# Supplementary material for: DNA Satellites Are Transcribed as Part of the Non-Coding Genome in Eukaryotes and Bacteria
Source: MDPI journal article supplement (doi:10.3390/genes12111651), 2021-10-20
Supplement: s1 [file s1]

## Table S6. Examples of perfect hits

SRR7443983. Spot 236610013 Score 127 Length 140 nt Identity 100 %

GGCGGCAAATCGGCAAATTGTCGG-AATTGAAAATTTCCGGCAAATCGGCAAATTGCCGG-AATTGAAAATTTCCGGCAAATCGCAAATGCCGA-AATTGCAAATT  
TCCGGCAAATCGGCAAATTGCCGG-AATgAAAATTTCCGGCAAATCGGCAAATTGCCGG-AATgAAAATTTCCGGCAAATCGGCAAATTGCCGG-AATgAAAATTTCC

SRR7443983. Spot 213225154 Score 118 Length 137 nt Identity 97.14%

TCTTAGGTATGGTATATT-TC TTGAAAATTTCCGGCAAATCGGTAATCGCCGG-AATTGAAAATTTCCGGCAAATCGGTAATTTGCCGG-AATTGAAAATTTTC  
AAATCGGCAAATTGCCGG-AATgAAAATTTCCGGCAAATCGGCAAATTGCCGG-AATgAAAATTTCCGGCAAATCGGCAAATTGCCGG-AATgAAAATTTCC

SRR7443983. Spot 150997260 Score 106 Length 140 nt Identity 95.45%

GCAAATCGCAAATTGCCGG-AATTCAA--TTCCGGCAAATCAAATACTCGG-AATTGAAAATTTCCGGCAAATCGGCAAGTTCCGA-AATTGAAAATTTCCGGCAAATTCAG-AATTGAAAATTC  
GCAAATCGGCAAATTGCCGG-AATgAAAATTTCCGGCAAATCGGCAAATTGCCGG-AATgAAAATTTCCGGCAAATCGGCAAATTGCCGG-AATgAAAATTTCCGGC

Above we compare the sequence of different RNA-seq spots (upper lines) with a theoretical satellite (lower lines) in *C.elegans*. Dashes separate individual repeats. The RNA-seq spots were obtained from a run of SRX4314512 with a query sequence of two repeats of the consensus sequence of Fam\_2\_35\_166 (AATgAAAATTTCCGGCAAATCGGCAAATTGCCGG). The theoretical satellite is formed by a string of repeats with this consensus sequence. Differences between both are highlighted in red. All spots in this run present a string of several repeats of this family, which differ slightly from the consensus sequence. In this way different regions of satellites in this family are captured in the RNA-seq experiment. Occasionally part of the sequence corresponds to the terminal region of one satellite with its neighboring region in the genome, as shown above in the second example. Below we show similar results in *B.coagulans*, with the reverse sequence of Fam\_360\_52\_1 (Table S5).

>gnl|SRA|SRR1574894.4395888.1 HWI-ST531R:246:C348YACXX:1:2112:12873:55937 (Biological)

TTTCCAAGCAACTGTCTTTTACAACGGTTCAAAAAGACAAAA-GCGTTCCAATTTTCCCGCAACTGTCTTTTACAACGATCAAAAAGACAAAA-GCATTC  
TTTCCACCGAACTGTCTTTTACAACGGTTCAAAAAGACAAAA-GCGTTCCAGCTTTCCACCGAACTGTCTTTTACAACGGTTCAAAAAGACAAAA-GCGTTCC...

>gnl|SRA|SRR1574894.6119208.1 HWI-ST531R:246:C348YACXX:1:2303:10326:69539 (Biological)

GTTCAAAAAGACAAAA--TCGTTCCAATTTTCCCGCAACTGTCTTTTACAACGATTCAAAAAGACAAAA-GCATTCAGCTTTCCACCAAAATGTTCCTTTACA  
GTTCAAAAAGACAAAA-GCGTTCCAGCTTTCCACCGAACTGTCTTTTACAACGGTTCAAAAAGACAAAA-GCGTTCCAGCTTTCCACCGAACTGTCTTTTACA...
