# Supplementary material for: DNA Satellites Are Transcribed as Part of the Non-Coding Genome in Eukaryotes and Bacteria
Source: MDPI journal article supplement (doi:10.3390/genes12111651), 2021-10-20
Supplement: s1 [file s1]

**Table S5.**

**Sequence of main families of *B.coagulans* satellites**

| Family name | Consensus Sequence                                                    |
|-------------|-----------------------------------------------------------------------|
| 1_52_139    | GTgAAGgAAGgcCnTCnTTTTTcCncGCTTcCTTAACGTAGACGcgCTCTAT                  |
| 2_52_35     | TTTTGTCCTTTTgACaGcTTCAAAAnGACATTTcGgGCCCgGATgCAgCntG                  |
| 8_52_18     | TGTCCTTCATaagggtGATGAAaGACAAAACaCnGGcCgggaAAcGgCgAAt                  |
| 360_52_1    | TTTTGTC <b>TTTTGA</b> ACCGTTGT <b>AAAAGACA</b> GTTcGgTGGAAAGCTGGAACGC |

We have used the consensus sequence of the main satellite families previously determined [15] from the genome sequence of seven strains of *B.coagulans*. We have also used a unique satellite (360\_52\_1), which is only present in the 2-6 strain studied by Qin et al. [11]. Note that part of the consensus sequence of this satellite (shown in red) is identical with the consensus sequence of the 2\_52\_35 family.
