# Supplementary material for: DNA Satellites Are Transcribed as Part of the Non-Coding Genome in Eukaryotes and Bacteria
Source: MDPI journal article supplement (doi:10.3390/genes12111651), 2021-10-20
Supplement: s1 [file s1]

**Table S1. A list of all satellites in *C.elegans***

| Genome                                                                                                                                                 | Satellite name       | Contig | Start  | End    | Sat. length | Number repeats | Repeat length | Seed motif  |
|--------------------------------------------------------------------------------------------------------------------------------------------------------|----------------------|--------|--------|--------|-------------|----------------|---------------|-------------|
| <u>repeat</u>                                                                                                                                          |                      |        |        |        |             |                |               |             |
| UNSB01.fasta                                                                                                                                           | Cele-UNSB01_1:1      | 1      | 1      | 2668   | 2668        | 204            | 12            | CTAAGCCTAA  |
| CTAAGCCTAAGC                                                                                                                                           |                      |        |        |        |             |                |               |             |
| UNSB01.fasta                                                                                                                                           | Cele-UNSB01_1:224582 | 1      | 224582 | 224687 | 106         | 5              | 15            | AGACCCATCG  |
| AGACCCATCGTGGTG                                                                                                                                        |                      |        |        |        |             |                |               |             |
| UNSB01.fasta                                                                                                                                           | Cele-UNSB01_1:282371 | 1      | 282371 | 283239 | 869         | 23             | 38            | AAATTTTAAT  |
| AAATTTTAATTTTTTGAAAATATTTGGCGGGAATTTA                                                                                                                  |                      |        |        |        |             |                |               |             |
| UNSB01.fasta                                                                                                                                           | Cele-UNSB01_1:283314 | 1      | 283314 | 284124 | 811         | 52             | 15            | TCGTGGTGAG  |
| TCGTGGTGAGACCCA                                                                                                                                        |                      |        |        |        |             |                |               |             |
| UNSB01.fasta                                                                                                                                           | Cele-UNSB01_1:309874 | 1      | 309874 | 309994 | 121         | 7              | 15            | GAGACCCATC  |
| GAGACCCATCGTGGC                                                                                                                                        |                      |        |        |        |             |                |               |             |
| UNSB01.fasta                                                                                                                                           | Cele-UNSB01_1:336527 | 1      | 336527 | 337247 | 721         | 18             | 40            | AATTTTCTCG  |
| AATTTTCTCGAAATTTCCAAAAGGTTCTAGAACATTTTCAG                                                                                                              |                      |        |        |        |             |                |               |             |
| UNSB01.fasta                                                                                                                                           | Cele-UNSB01_1:340649 | 1      | 340649 | 342857 | 2209        | 12             | 184           | GAATACAGAA  |
| GAATACAGAACACCAATTATGCCCGAGAAAAAGATCCTACTCAGAATATAAACATAGTCAAATTTATCGGATGTATAAAGATTCCCGAAGACACTTCCAATTACCCAAATTGTTTCATATTCTAAATGAAATTC'TTTTACTAGAACACT |                      |        |        |        |             |                |               |             |
| CTTGGCCAATGTACGCAGCCGAACGTATCATAAGT                                                                                                                    |                      |        |        |        |             |                |               |             |
| UNSB01.fasta                                                                                                                                           | Cele-UNSB01_1:356425 | 1      | 356425 | 357011 | 587         | 29             | 19            | TATCGATTTT  |
| TATCGATTTTCTGAAATT                                                                                                                                     |                      |        |        |        |             |                |               |             |
| UNSB01.fasta                                                                                                                                           | Cele-UNSB01_1:360798 | 1      | 360798 | 360950 | 153         | 8              | 19            | GTACTACCTT  |
| GTACTACCTTTTAATGTAT                                                                                                                                    |                      |        |        |        |             |                |               |             |
| UNSB01.fasta                                                                                                                                           | Cele-UNSB01_1:479600 | 1      | 479600 | 479769 | 170         | 13             | 12            | TAGGCTTAGG  |
| TAGGCCTAGGCT                                                                                                                                           |                      |        |        |        |             |                |               |             |
| UNSB01.fasta                                                                                                                                           | Cele-UNSB01_1:558852 | 1      | 558852 | 559000 | 149         | 8              | 12            | CTAAGCCTAA  |
| CTAAGCCTAAGC                                                                                                                                           |                      |        |        |        |             |                |               |             |
| UNSB01.fasta                                                                                                                                           | Cele-UNSB01_1:564264 | 1      | 564264 | 564319 | 56          | 5              | 11            | GTACTCCTAC  |
| GTACTCCTAAA                                                                                                                                            |                      |        |        |        |             |                |               |             |
| UNSB01.fasta                                                                                                                                           | Cele-UNSB01_1:567454 | 1      | 567454 | 567526 | 73          | 6              | 12            | GCGTTGCGTG  |
| GCGTTGCGTGCC                                                                                                                                           |                      |        |        |        |             |                |               |             |
| UNSB01.fasta                                                                                                                                           | Cele-UNSB01_1:568805 | 1      | 568805 | 568943 | 139         | 8              | 12            | AGGCTTAGGC  |
| AGGCCTAGGCTT                                                                                                                                           |                      |        |        |        |             |                |               |             |
| UNSB01.fasta                                                                                                                                           | Cele-UNSB01_1:625093 | 1      | 625093 | 626033 | 941         | 22             | 23            | AAAAAAAATT  |
| AAAAAAAATTAAATTTTTCACG                                                                                                                                 |                      |        |        |        |             |                |               |             |
| UNSB01.fasta                                                                                                                                           | Cele-UNSB01_1:642767 | 1      | 642767 | 642875 | 109         | 6              | 12            | TAAGCCTAAG  |
| TGAGCCTAAGCG                                                                                                                                           |                      |        |        |        |             |                |               |             |
| UNSB01.fasta                                                                                                                                           | Cele-UNSB01_1:671513 | 1      | 671513 | 680928 | 9416        | 294            | 32            | GAATTCAAAT  |
| GAATTCAAATTTTCTGAGAAAAATTTAGGCGA                                                                                                                       |                      |        |        |        |             |                |               |             |
| UNSB01.fasta                                                                                                                                           | Cele-UNSB01_1:685710 | 1      | 685710 | 685978 | 269         | 6              | 45            | TCTGATCCTT  |
| TCTGATCCTTCAGATAAGAAGGATCGTAAGGGTACCTCCTGATGG                                                                                                          |                      |        |        |        |             |                |               |             |
| UNSB01.fasta                                                                                                                                           | Cele-UNSB01_1:696260 | 1      | 696260 | 697073 | 814         | 14             | 44            | TTTGCCGGTT  |
| TTTGCCGGTTTGGCGATTGCCCCGAAATTTTCAATTTCGGCAA                                                                                                            |                      |        |        |        |             |                |               |             |
| UNSB01.fasta                                                                                                                                           | Cele-UNSB01_1:698928 | 1      | 698928 | 699108 | 181         | 12             | 15            | GGTGAGACCC  |
| GGTGAGACACATCGT                                                                                                                                        |                      |        |        |        |             |                |               |             |
| UNSB01.fasta                                                                                                                                           | Cele-UNSB01_1:733992 | 1      | 733992 | 734160 | 169         | 4              | 42            | TTTGATCTAC  |
| TTTGATCTACAAAAATGCGGGAATTTTCCCAGCATTGCTCA                                                                                                              |                      |        |        |        |             |                |               |             |
| UNSB01.fasta                                                                                                                                           | Cele-UNSB01_1:736250 | 1      | 736250 | 736486 | 237         | 5              | 12            | GCTTAGGCCTT |
| GCTTAGGCCTGG                                                                                                                                           |                      |        |        |        |             |                |               |             |
| UNSB01.fasta                                                                                                                                           | Cele-UNSB01_1:742856 | 1      | 742856 | 743285 | 430         | 11             | 12            | GCAGGTAGGT  |
| GTAGGTAGGTAG                                                                                                                                           |                      |        |        |        |             |                |               |             |
| UNSB01.fasta                                                                                                                                           | Cele-UNSB01_1:758474 | 1      | 758474 | 759042 | 569         | 35             | 16            | TTTCAGGCCTT |
| TTTCAGGCCTTTCAGGC                                                                                                                                      |                      |        |        |        |             |                |               |             |
| UNSB01.fasta                                                                                                                                           | Cele-UNSB01_1:768290 | 1      | 768290 | 768741 | 452         | 13             | 34            | TTTCTCAGAA  |
| TTTATCAGAAAATTTGAATTTCCACCAAATTT                                                                                                                       |                      |        |        |        |             |                |               |             |

|                                                                                                                                                   |                       |   |         |         |       |     |     |             |
|---------------------------------------------------------------------------------------------------------------------------------------------------|-----------------------|---|---------|---------|-------|-----|-----|-------------|
| UNSB01.fasta                                                                                                                                      | Cele-UNSB01_1:774871  | 1 | 774871  | 775189  | 319   | 26  | 12  | TCTAGGTCTA  |
| TCTAGGTTTAGG                                                                                                                                      |                       |   |         |         |       |     |     |             |
| UNSB01.fasta                                                                                                                                      | Cele-UNSB01_1:787252  | 1 | 787252  | 787531  | 280   | 6   | 40  | GAACCTTCTG  |
| GAACCTTTTGAAATTTTGAGAAAATCTGGAATGTTTTG                                                                                                            |                       |   |         |         |       |     |     |             |
| UNSB01.fasta                                                                                                                                      | Cele-UNSB01_1:788353  | 1 | 788353  | 788527  | 175   | 12  | 12  | GCCTAAGCCT  |
| GCCTAAGCCTAA                                                                                                                                      |                       |   |         |         |       |     |     |             |
| UNSB01.fasta                                                                                                                                      | Cele-UNSB01_1:789928  | 1 | 789928  | 790208  | 281   | 7   | 40  | TCTAGAACAT  |
| TCTAGAACATTCCAACTTTTCTCAAAGTTCCAAAAGAC                                                                                                            |                       |   |         |         |       |     |     |             |
| UNSB01.fasta                                                                                                                                      | Cele-UNSB01_1:815618  | 1 | 815618  | 815840  | 223   | 16  | 12  | GCCTAAGCCT  |
| GCCAAAGCCTGA                                                                                                                                      |                       |   |         |         |       |     |     |             |
| UNSB01.fasta                                                                                                                                      | Cele-UNSB01_1:817628  | 1 | 817628  | 817952  | 325   | 8   | 22  | TTAAAAATTTT |
| TTAAAAATTTTGTCTAGTTTGACA                                                                                                                          |                       |   |         |         |       |     |     |             |
| UNSB01.fasta                                                                                                                                      | Cele-UNSB01_1:823660  | 1 | 823660  | 823840  | 181   | 13  | 12  | GCTTAGGCTT  |
| GCTTAGGCTTAG                                                                                                                                      |                       |   |         |         |       |     |     |             |
| UNSB01.fasta                                                                                                                                      | Cele-UNSB01_1:833000  | 1 | 833000  | 833653  | 654   | 29  | 21  | TGGCCTAGAT  |
| TGGCCTCGATTCTGTACAGGG                                                                                                                             |                       |   |         |         |       |     |     |             |
| UNSB01.fasta                                                                                                                                      | Cele-UNSB01_1:842713  | 1 | 842713  | 843650  | 938   | 48  | 12  | CTTAGGCTTA  |
| CTCAGGCTTAGG                                                                                                                                      |                       |   |         |         |       |     |     |             |
| UNSB01.fasta                                                                                                                                      | Cele-UNSB01_1:855372  | 1 | 855372  | 855570  | 199   | 12  | 12  | GCTTAGGCTT  |
| GCTTAGACTTAG                                                                                                                                      |                       |   |         |         |       |     |     |             |
| UNSB01.fasta                                                                                                                                      | Cele-UNSB01_1:907957  | 1 | 907957  | 908415  | 459   | 21  | 22  | TTTTAGCCAA  |
| TTTTAACCAAAAATCCGTGA                                                                                                                              |                       |   |         |         |       |     |     |             |
| UNSB01.fasta                                                                                                                                      | Cele-UNSB01_1:911764  | 1 | 911764  | 911915  | 152   | 8   | 15  | ATCTTCTTTT  |
| ATCTTCTTTTGGTAA                                                                                                                                   |                       |   |         |         |       |     |     |             |
| UNSB01.fasta                                                                                                                                      | Cele-UNSB01_1:927465  | 1 | 927465  | 927693  | 229   | 6   | 32  | GAAAATTTGA  |
| GAAAATTTGAATCCCGCCAAGATTTTACAA                                                                                                                    |                       |   |         |         |       |     |     |             |
| UNSB01.fasta                                                                                                                                      | Cele-UNSB01_1:932742  | 1 | 932742  | 934750  | 2009  | 89  | 21  | AATTTCAGG   |
| AATTTCAGGCCACGATCTGA                                                                                                                              |                       |   |         |         |       |     |     |             |
| UNSB01.fasta                                                                                                                                      | Cele-UNSB01_1:943054  | 1 | 943054  | 953346  | 10293 | 369 | 27  | TTTTACTCTC  |
| TTTTACTCTCTGTGGCTTCACCAATTA                                                                                                                       |                       |   |         |         |       |     |     |             |
| UNSB01.fasta                                                                                                                                      | Cele-UNSB01_1:961004  | 1 | 961004  | 961082  | 79    | 6   | 12  | AGCCTAAGCC  |
| AGCCTAAGCCTA                                                                                                                                      |                       |   |         |         |       |     |     |             |
| UNSB01.fasta                                                                                                                                      | Cele-UNSB01_1:961195  | 1 | 961195  | 961471  | 277   | 23  | 12  | CTAAGTCTAA  |
| CTAAGTCTAAGT                                                                                                                                      |                       |   |         |         |       |     |     |             |
| UNSB01.fasta                                                                                                                                      | Cele-UNSB01_1:961002  | 1 | 961002  | 961808  | 807   | 44  | 12  | TAAGCCTAAG  |
| TAAGCCTAAGCC                                                                                                                                      |                       |   |         |         |       |     |     |             |
| UNSB01.fasta                                                                                                                                      | Cele-UNSB01_1:980318  | 1 | 980318  | 980990  | 673   | 16  | 42  | CCGGAAATTT  |
| CCGGAAATTTGAAAACCGCAATTGCCGAAATTGCCCATTTG                                                                                                         |                       |   |         |         |       |     |     |             |
| UNSB01.fasta                                                                                                                                      | Cele-UNSB01_1:995161  | 1 | 995161  | 995964  | 804   | 5   | 162 | ATCATATGAA  |
| ATCATATGAAATGCTTTTTTTTCTTTTTTAAACCTATTTAGAATTGTCAAACTACCAGAAAATACTAAACAAAATAGCTTAGCTTGACCGAAATATTTTTAAAAAATTGATAAAAAATGAAAAGCTGATATTTTCAAAATTTCCA |                       |   |         |         |       |     |     |             |
| GAATGACGGAAAA                                                                                                                                     |                       |   |         |         |       |     |     |             |
| UNSB01.fasta                                                                                                                                      | Cele-UNSB01_1:1009660 | 1 | 1009660 | 1009762 | 103   | 8   | 12  | GGTCTAGGTC  |
| GGTCTAGGTCTA                                                                                                                                      |                       |   |         |         |       |     |     |             |
| UNSB01.fasta                                                                                                                                      | Cele-UNSB01_1:1012680 | 1 | 1012680 | 1013098 | 419   | 4   | 32  | CAAAATTTTT  |
| CAAAATTTTTCTAAGAAAATTTGAATTCCTGC                                                                                                                  |                       |   |         |         |       |     |     |             |
| UNSB01.fasta                                                                                                                                      | Cele-UNSB01_1:1018800 | 1 | 1018800 | 1018890 | 91    | 5   | 12  | AGCCTAAGCC  |
| AGCATAAGCCTA                                                                                                                                      |                       |   |         |         |       |     |     |             |
| UNSB01.fasta                                                                                                                                      | Cele-UNSB01_1:1018801 | 1 | 1018801 | 1019027 | 227   | 14  | 12  | GCCTAAGCCT  |
| GCATAAGCCTAA                                                                                                                                      |                       |   |         |         |       |     |     |             |
| UNSB01.fasta                                                                                                                                      | Cele-UNSB01_1:1031726 | 1 | 1031726 | 1032601 | 876   | 25  | 35  | ATTTTCAATT  |
| ATTTTCAATTCCGGCAATTGCGGATTTGCCGGAA                                                                                                                |                       |   |         |         |       |     |     |             |
| UNSB01.fasta                                                                                                                                      | Cele-UNSB01_1:1103105 | 1 | 1103105 | 1103421 | 317   | 8   | 35  | CGGCAAATCG  |
| CGGCAAATCGGTATTTTGCCGGAATTGAAAATTTT                                                                                                               |                       |   |         |         |       |     |     |             |
| UNSB01.fasta                                                                                                                                      | Cele-UNSB01_1:1117625 | 1 | 1117625 | 1118154 | 530   | 23  | 23  | GGCCTAGAAA  |
| GGCCTAGAAATACTGAAAGTGGT                                                                                                                           |                       |   |         |         |       |     |     |             |
| UNSB01.fasta                                                                                                                                      | Cele-UNSB01_1:1127917 | 1 | 1127917 | 1128577 | 661   | 21  | 20  | ATTTCTAGGC  |
| ATTTCTAGGCTATCGATGAG                                                                                                                              |                       |   |         |         |       |     |     |             |
| UNSB01.fasta                                                                                                                                      | Cele-UNSB01_1:1149569 | 1 | 1149569 | 1149724 | 156   | 10  | 12  | CCTAAGCCTA  |
| CCTAAGCCTAAG                                                                                                                                      |                       |   |         |         |       |     |     |             |

|                                                                                                                                                     |                       |   |         |         |      |     |     |             |
|-----------------------------------------------------------------------------------------------------------------------------------------------------|-----------------------|---|---------|---------|------|-----|-----|-------------|
| UNSB01.fasta                                                                                                                                        | Cele-UNSB01_1:1158888 | 1 | 1158888 | 1159076 | 189  | 5   | 31  | ATTTCCCGCCA |
| ATTTCCCGCCAATTTTTTCTCAGAAATTTTGA                                                                                                                    |                       |   |         |         |      |     |     |             |
| UNSB01.fasta                                                                                                                                        | Cele-UNSB01_1:1232170 | 1 | 1232170 | 1233535 | 1366 | 32  | 43  | CCAGAAATTA  |
| CCAGAAATTAGAATTTTCGGCAAATCAACAACTGACAAATTG                                                                                                          |                       |   |         |         |      |     |     |             |
| UNSB01.fasta                                                                                                                                        | Cele-UNSB01_1:1234705 | 1 | 1234705 | 1235262 | 558  | 15  | 35  | AAATCGGCAA  |
| AAATCGGCAATTTTCCTAAATGAAAGGTTCCGGC                                                                                                                  |                       |   |         |         |      |     |     |             |
| UNSB01.fasta                                                                                                                                        | Cele-UNSB01_1:1236946 | 1 | 1236946 | 1237103 | 158  | 7   | 11  | GTACTGTAGG  |
| GTACTGTAGGA                                                                                                                                         |                       |   |         |         |      |     |     |             |
| UNSB01.fasta                                                                                                                                        | Cele-UNSB01_1:1302534 | 1 | 1302534 | 1303556 | 1023 | 33  | 19  | TTCTAGGCCA  |
| TTCTAGGCCATCTGATAAT                                                                                                                                 |                       |   |         |         |      |     |     |             |
| UNSB01.fasta                                                                                                                                        | Cele-UNSB01_1:1341786 | 1 | 1341786 | 1343571 | 1786 | 47  | 38  | GGGAATTCAA  |
| GGGAATCAAACCTTTAATTTTTTTGAAAACATTTTGGC                                                                                                              |                       |   |         |         |      |     |     |             |
| UNSB01.fasta                                                                                                                                        | Cele-UNSB01_1:1346901 | 1 | 1346901 | 1347222 | 322  | 5   | 42  | TTTGCCGGAA  |
| TTTCCCGGAAGTTTTCATTTTCGACAAATTACCGATTTGTCG                                                                                                          |                       |   |         |         |      |     |     |             |
| UNSB01.fasta                                                                                                                                        | Cele-UNSB01_1:1386048 | 1 | 1386048 | 1386208 | 161  | 5   | 32  | AAAATTTTGG  |
| AAAATTTTGGCGGAATTCAAATTTTCTGAGA                                                                                                                     |                       |   |         |         |      |     |     |             |
| UNSB01.fasta                                                                                                                                        | Cele-UNSB01_1:1435639 | 1 | 1435639 | 1436319 | 681  | 8   | 71  | ATTTATGTGA  |
| ATTTATGTGAAAATTAGGTTTTAGGGCATTTTTTGAGGGAAATCTGATTTTTTTTCGATTTTCTGGCGA                                                                               |                       |   |         |         |      |     |     |             |
| UNSB01.fasta                                                                                                                                        | Cele-UNSB01_1:1456315 | 1 | 1456315 | 1457241 | 927  | 24  | 35  | AAATTTGAAT  |
| AAATCTGAATTTCCCGCAAAATTTTTTTCTCAGA                                                                                                                  |                       |   |         |         |      |     |     |             |
| UNSB01.fasta                                                                                                                                        | Cele-UNSB01_1:1457508 | 1 | 1457508 | 1457876 | 369  | 14  | 11  | CTACAGTACT  |
| CTACAGTAATT                                                                                                                                         |                       |   |         |         |      |     |     |             |
| UNSB01.fasta                                                                                                                                        | Cele-UNSB01_1:1530606 | 1 | 1530606 | 1531290 | 685  | 18  | 31  | GGTTACTGTA  |
| GGTTACTGTAACTCAATTATAGGATTCTTCG                                                                                                                     |                       |   |         |         |      |     |     |             |
| UNSB01.fasta                                                                                                                                        | Cele-UNSB01_1:1591838 | 1 | 1591838 | 1592129 | 292  | 7   | 35  | CGGCAAATCG  |
| CGGCAAATCGGCAAATTGCCGAATTGAAAATTTTC                                                                                                                 |                       |   |         |         |      |     |     |             |
| UNSB01.fasta                                                                                                                                        | Cele-UNSB01_1:1620106 | 1 | 1620106 | 1621181 | 1076 | 5   | 189 | TTTTTTTTGA  |
| TTTTTTTTGACTATGAATTATAAGAAAAATCGAATTTCAAAAAGCATGTATTAGCCAATGTAAACGCGCTCCAATGATGATGTAGCCACAGTGGTATCAGAGTGTCTCTTTACGGCTTGATTTAAATACGTAGATCTACAAATTCAC |                       |   |         |         |      |     |     |             |
| TTATCTGTTTTCTCACGGGTTTAGGATATTTTTCTGTTA                                                                                                             |                       |   |         |         |      |     |     |             |
| UNSB01.fasta                                                                                                                                        | Cele-UNSB01_1:1632570 | 1 | 1632570 | 1633118 | 549  | 6   | 35  | AAATTTTCAA  |
| AAATTTTCAATTCGGCATTTTGCCGATTTGCCGG                                                                                                                  |                       |   |         |         |      |     |     |             |
| UNSB01.fasta                                                                                                                                        | Cele-UNSB01_1:1647038 | 1 | 1647038 | 1647577 | 540  | 9   | 49  | CAATAATTTT  |
| CAATAATTTTAAATGTAATTATCGATTTTCTAAATTTTGCCGAAAAAT                                                                                                    |                       |   |         |         |      |     |     |             |
| UNSB01.fasta                                                                                                                                        | Cele-UNSB01_1:1679297 | 1 | 1679297 | 1679633 | 337  | 16  | 21  | TCTCCTGGTA  |
| TCTCCTGGTAAATTTAAAAAT                                                                                                                               |                       |   |         |         |      |     |     |             |
| UNSB01.fasta                                                                                                                                        | Cele-UNSB01_1:1680231 | 1 | 1680231 | 1680351 | 121  | 7   | 12  | AGCCTAAACC  |
| AGCCTAAACCTG                                                                                                                                        |                       |   |         |         |      |     |     |             |
| UNSB01.fasta                                                                                                                                        | Cele-UNSB01_1:1685357 | 1 | 1685357 | 1686631 | 1275 | 49  | 26  | CAAACCGGC   |
| CAAACCGGCAATTGCCGAAAATTC                                                                                                                            |                       |   |         |         |      |     |     |             |
| UNSB01.fasta                                                                                                                                        | Cele-UNSB01_1:1691009 | 1 | 1691009 | 1691188 | 180  | 4   | 45  | TCTGATCCTT  |
| TCTGATCCTTCAGATAAGAAGGATCGTAAGGTGCCACTTGATGG                                                                                                        |                       |   |         |         |      |     |     |             |
| UNSB01.fasta                                                                                                                                        | Cele-UNSB01_1:1730783 | 1 | 1730783 | 1731662 | 880  | 24  | 30  | AATTTGAATT  |
| AATTTGATTATTTCCGAATTTTTTAGCGAA                                                                                                                      |                       |   |         |         |      |     |     |             |
| UNSB01.fasta                                                                                                                                        | Cele-UNSB01_1:1781850 | 1 | 1781850 | 1784996 | 3147 | 154 | 20  | CCACCAAAAA  |
| CCACCAAAAAGATTTCTAGG                                                                                                                                |                       |   |         |         |      |     |     |             |
| UNSB01.fasta                                                                                                                                        | Cele-UNSB01_1:1787086 | 1 | 1787086 | 1788479 | 1394 | 64  | 20  | TTCTAGGCCA  |
| TTCTAGGCCACCAAGAAAGT                                                                                                                                |                       |   |         |         |      |     |     |             |
| UNSB01.fasta                                                                                                                                        | Cele-UNSB01_1:1822719 | 1 | 1822719 | 1823169 | 451  | 9   | 43  | AAATCGGCAA  |
| AAATCGGCAACCCCGCAATTTGCCAGAATTGAAAATTTCCGGA                                                                                                         |                       |   |         |         |      |     |     |             |
| UNSB01.fasta                                                                                                                                        | Cele-UNSB01_1:1824052 | 1 | 1824052 | 1824465 | 414  | 9   | 43  | GCCGGAATTG  |
| GCCGGAATTGAAAATTTCTGGCAAATCGGCAAACCGACACATA                                                                                                         |                       |   |         |         |      |     |     |             |
| UNSB01.fasta                                                                                                                                        | Cele-UNSB01_1:1833668 | 1 | 1833668 | 1834030 | 363  | 11  | 26  | TTGCCGGTTT  |
| TTGCTGGTTTTGGGAATTATCGGCAC                                                                                                                          |                       |   |         |         |      |     |     |             |

|                                                                                                                                                      |                       |   |         |         |       |     |     |            |
|------------------------------------------------------------------------------------------------------------------------------------------------------|-----------------------|---|---------|---------|-------|-----|-----|------------|
| UNSB01.fasta                                                                                                                                         | Cele-UNSB01_1:1878726 | 1 | 1878726 | 1878810 | 85    | 4   | 21  | CCTACTCTAG |
| CCTACTCTAGGCAGCCCCCTAG                                                                                                                               |                       |   |         |         |       |     |     |            |
| UNSB01.fasta                                                                                                                                         | Cele-UNSB01_1:1878816 | 1 | 1878816 | 1878916 | 101   | 5   | 20  | CTAGGCAGAC |
| CTAGGCAGACTTAGCCTACC                                                                                                                                 |                       |   |         |         |       |     |     |            |
| UNSB01.fasta                                                                                                                                         | Cele-UNSB01_1:1910732 | 1 | 1910732 | 1911187 | 456   | 11  | 35  | AAATCGGCAA |
| AAATCGGCAAATTGCCGAAACTAAAAATTTCTGGT                                                                                                                  |                       |   |         |         |       |     |     |            |
| UNSB01.fasta                                                                                                                                         | Cele-UNSB01_1:1946077 | 1 | 1946077 | 1948348 | 2272  | 60  | 35  | TTGCCGATTT |
| TTGCCGATTTGCCGAAATTTTCATTTTTCGCAAA                                                                                                                   |                       |   |         |         |       |     |     |            |
| UNSB01.fasta                                                                                                                                         | Cele-UNSB01_1:1961569 | 1 | 1961569 | 1963172 | 1604  | 40  | 35  | GAAATTTTCA |
| GAAATTTTCAGTTTCGGCAAATTGCCGATTTGCC                                                                                                                   |                       |   |         |         |       |     |     |            |
| UNSB01.fasta                                                                                                                                         | Cele-UNSB01_1:1961569 | 1 | 1961569 | 1964216 | 2648  | 64  | 35  | GAAATTTTCA |
| GAAATTTTCAGTTTCGGCAAATTGCCGATTTGCC                                                                                                                   |                       |   |         |         |       |     |     |            |
| UNSB01.fasta                                                                                                                                         | Cele-UNSB01_1:1961569 | 1 | 1961569 | 1966139 | 4571  | 108 | 35  | GAAATTTTCA |
| GAAATTTTCAGTTTCGGCAAATTGCCGATTTGCC                                                                                                                   |                       |   |         |         |       |     |     |            |
| UNSB01.fasta                                                                                                                                         | Cele-UNSB01_1:1961569 | 1 | 1961569 | 1968269 | 6701  | 154 | 35  | GAAATTTTCA |
| GAAATTTTCAGTTTCGGCAAATTGCCGATTTGCC                                                                                                                   |                       |   |         |         |       |     |     |            |
| UNSB01.fasta                                                                                                                                         | Cele-UNSB01_1:1976543 | 1 | 1976543 | 1977056 | 514   | 5   | 35  | TTTGCCGGAA |
| TTTGCCGGAAATTTTCATTTTGGCAAAGTGCCGA                                                                                                                   |                       |   |         |         |       |     |     |            |
| UNSB01.fasta                                                                                                                                         | Cele-UNSB01_1:1980049 | 1 | 1980049 | 1980327 | 279   | 8   | 35  | TTGCCGGAAA |
| TTGCCGGAAAGTATCAATTTCCGCTGATGCCGAT                                                                                                                   |                       |   |         |         |       |     |     |            |
| UNSB01.fasta                                                                                                                                         | Cele-UNSB01_1:2017348 | 1 | 2017348 | 2017684 | 337   | 5   | 38  | AAAATCGATA |
| AAAATCGATAATTTTCAGTATGCAGTGAATTTCTTGA                                                                                                                |                       |   |         |         |       |     |     |            |
| UNSB01.fasta                                                                                                                                         | Cele-UNSB01_1:2044939 | 1 | 2044939 | 2045157 | 219   | 13  | 11  | TTTTGCCGAA |
| TTTCGCCGAAC                                                                                                                                          |                       |   |         |         |       |     |     |            |
| UNSB01.fasta                                                                                                                                         | Cele-UNSB01_1:2141918 | 1 | 2141918 | 2142329 | 412   | 7   | 35  | CAAACCGGCA |
| CAAACCGGCATTTTGCCGGAAATTAACATTTAGAG                                                                                                                  |                       |   |         |         |       |     |     |            |
| UNSB01.fasta                                                                                                                                         | Cele-UNSB01_1:2169410 | 1 | 2169410 | 2169690 | 281   | 8   | 35  | CGGCAAATTG |
| CGGCAAATTGCCGATTTGCCGGAACTTTCAATTC                                                                                                                   |                       |   |         |         |       |     |     |            |
| UNSB01.fasta                                                                                                                                         | Cele-UNSB01_1:2174082 | 1 | 2174082 | 2174248 | 167   | 10  | 15  | AGATCTTGTT |
| AGATCATGTTTTCGG                                                                                                                                      |                       |   |         |         |       |     |     |            |
| UNSB01.fasta                                                                                                                                         | Cele-UNSB01_1:2195476 | 1 | 2195476 | 2195914 | 439   | 10  | 35  | TTTGCCGGAA |
| TTTGCCGGAATTTTCGGAATCTGACAGTTTGCCGG                                                                                                                  |                       |   |         |         |       |     |     |            |
| UNSB01.fasta                                                                                                                                         | Cele-UNSB01_1:2263475 | 1 | 2263475 | 2263726 | 252   | 6   | 43  | CAAATCGGCA |
| CAAATCGGCAACTCGGCAAATTTCCGAAATTAAAAAATTTTCAG                                                                                                         |                       |   |         |         |       |     |     |            |
| UNSB01.fasta                                                                                                                                         | Cele-UNSB01_1:2281114 | 1 | 2281114 | 2281247 | 134   | 4   | 33  | TAAGAAAAGT |
| TAAGAAAAGTTAGGCCACCAAACATTGGTGGAC                                                                                                                    |                       |   |         |         |       |     |     |            |
| UNSB01.fasta                                                                                                                                         | Cele-UNSB01_1:2284293 | 1 | 2284293 | 2285881 | 1589  | 82  | 12  | CACGCAACGC |
| CACGCAACGCTG                                                                                                                                         |                       |   |         |         |       |     |     |            |
| UNSB01.fasta                                                                                                                                         | Cele-UNSB01_1:2293586 | 1 | 2293586 | 2294094 | 509   | 12  | 43  | AATTTCCGGC |
| AATTTCCGGCAAACCGGCAAACCGACATGTTGCCGAAAAAGAA                                                                                                          |                       |   |         |         |       |     |     |            |
| UNSB01.fasta                                                                                                                                         | Cele-UNSB01_1:2301010 | 1 | 2301010 | 2301088 | 79    | 6   | 12  | TAGGCTTAGG |
| TAGGCTTAGGCT                                                                                                                                         |                       |   |         |         |       |     |     |            |
| UNSB01.fasta                                                                                                                                         | Cele-UNSB01_1:2308046 | 1 | 2308046 | 2308235 | 190   | 5   | 12  | AGGCTTAGGC |
| AGGCTCAGGCTC                                                                                                                                         |                       |   |         |         |       |     |     |            |
| UNSB01.fasta                                                                                                                                         | Cele-UNSB01_1:2365340 | 1 | 2365340 | 2366051 | 712   | 8   | 20  | GGACTAGTTT |
| GGACTAGTTTTTGAGTAGAG                                                                                                                                 |                       |   |         |         |       |     |     |            |
| UNSB01.fasta                                                                                                                                         | Cele-UNSB01_1:2365340 | 1 | 2365340 | 2366212 | 873   | 11  | 20  | GGACTAGTTT |
| GGACTAGTTTTTGAGTAGAG                                                                                                                                 |                       |   |         |         |       |     |     |            |
| UNSB01.fasta                                                                                                                                         | Cele-UNSB01_1:2396315 | 1 | 2396315 | 2396849 | 535   | 20  | 20  | TTATTGATTT |
| TTATTAAATTTTCTAGGACA                                                                                                                                 |                       |   |         |         |       |     |     |            |
| UNSB01.fasta                                                                                                                                         | Cele-UNSB01_1:2402282 | 1 | 2402282 | 2402378 | 97    | 6   | 12  | AAGCCTAAGC |
| AAGCCTAAGCCT                                                                                                                                         |                       |   |         |         |       |     |     |            |
| UNSB01.fasta                                                                                                                                         | Cele-UNSB01_1:2461739 | 1 | 2461739 | 2462720 | 982   | 5   | 175 | GATGCACCAT |
| GATGCACCATGTCTTTGAAAGCCTATACTTCGGTTCAATTCGTAGCTGTCAAAAATTTTAAACAACACATCTATAGAAATCAACATGCTTAATATTTTCGTAGTTGACAGTTTTTTTGATACTGCAATGAAATCCGAGATATGAGCTT |                       |   |         |         |       |     |     |            |
| TCAAAGTTGAGAGACCTCACTCGGTT                                                                                                                           |                       |   |         |         |       |     |     |            |
| UNSB01.fasta                                                                                                                                         | Cele-UNSB01_1:2556234 | 1 | 2556234 | 2556523 | 290   | 10  | 18  | GCCTAGGAAT |
| GACTAGGAATCCAATATG                                                                                                                                   |                       |   |         |         |       |     |     |            |
| UNSB01.fasta                                                                                                                                         | Cele-UNSB01_1:2574462 | 1 | 2574462 | 2585290 | 10829 | 565 | 19  | TACACGAAAA |
| TACACGAAAAATAGATTGT                                                                                                                                  |                       |   |         |         |       |     |     |            |



|                                                                                                                                                        |                       |   |           |         |       |      |     |             |
|--------------------------------------------------------------------------------------------------------------------------------------------------------|-----------------------|---|-----------|---------|-------|------|-----|-------------|
| UNSB01.fasta                                                                                                                                           | Cele-UNSB01_1:3798271 | 1 | 3798271   | 3798674 | 404   | 9    | 45  | TCTGATCCTT  |
| TCTGATCCTTCAGATAAGAAGGATCGTAAGGGTACCTCCTGATGG                                                                                                          |                       |   |           |         |       |      |     |             |
| UNSB01.fasta                                                                                                                                           | Cele-UNSB01_1:3799094 | 1 | 3799094   | 3799407 | 314   | 7    | 45  | CTGAAGGATC  |
| CTGAAGTATCAGACCATCAGGTGGTACCCCTTACGATCCTTCTTAT                                                                                                         |                       |   |           |         |       |      |     |             |
| UNSB01.fasta                                                                                                                                           | Cele-UNSB01_1:3815334 | 1 | 3815334   | 3818659 | 3326  | 133  | 25  | TTTACTCTCT  |
| TTTACTCTCTGGCTTCACCAAATAT                                                                                                                              |                       |   |           |         |       |      |     |             |
| UNSB01.fasta                                                                                                                                           | Cele-UNSB01_1:3888641 | 1 | 3888641   | 3889727 | 1087  | 26   | 34  | TGCCGGAATT  |
| TGTCGGAAATTGAAATTCCAGCAAATCGGCAAAT                                                                                                                     |                       |   |           |         |       |      |     |             |
| UNSB01.fasta                                                                                                                                           | Cele-UNSB01_1:4033028 | 1 | 4033028   | 4033133 | 106   | 7    | 15  | TCGTGGTGAG  |
| TCGTGGTGAGACCCCT                                                                                                                                       |                       |   |           |         |       |      |     |             |
| UNSB01.fasta                                                                                                                                           | Cele-UNSB01_1:4033525 | 1 | 4033525   | 4033725 | 201   | 6    | 40  | TTTCTAGAAA  |
| TTTCTAGAAAATTTCGGGAAAACCTCTGGAATATTCCAGAAC                                                                                                             |                       |   |           |         |       |      |     |             |
| UNSB01.fasta                                                                                                                                           | Cele-UNSB01_1:4042754 | 1 | 4042754   | 4055380 | 12627 | 214  | 59  | AAAACCAAGTG |
| AAAACCAAGTGCGCATTGAAATTCCAAATCTCCATTATTTTCAGTTTAAAAAATTTTG                                                                                             |                       |   |           |         |       |      |     |             |
| UNSB01.fasta                                                                                                                                           | Cele-UNSB01_1:4183555 | 1 | 4183555   | 4184714 | 1160  | 5    | 223 | TTTCAGAATT  |
| TTTCAGAATTAAAAACGGCATTCCAAAACTTTACACACCGCCAAGCTCAAGCAAAAAAGTAAACTTCAGTCATACCTTTCAGAGCAAACCTTGAAATTGAATGAAATAGACCATTTATTTGCAAAATTAGTAGATTTTCCAATTTT     |                       |   |           |         |       |      |     |             |
| TAAAAATTAATATCTGGCTTCTAAATACTTTTTTGAAAAATCCCCGTAGCCATTTTGTGCAAATTTTGTGCTC                                                                              |                       |   |           |         |       |      |     |             |
| UNSB01.fasta                                                                                                                                           | Cele-UNSB01_1:4232491 | 1 | 4232491   | 4233003 | 513   | 13   | 39  | TATTTTTTAAT |
| TATTTTTAATTTGGCCTACTTAAAAAGTAGGTCATGACT                                                                                                                |                       |   |           |         |       |      |     |             |
| UNSB01.fasta                                                                                                                                           | Cele-UNSB01_1:4250268 | 1 | 4250268   | 4250328 | 61    | 4    | 15  | TTTCCGGATC  |
| TTTCCGGATCTACGT                                                                                                                                        |                       |   |           |         |       |      |     |             |
| UNSB01.fasta                                                                                                                                           | Cele-UNSB01_1:4250510 | 1 | 4250510   | 4250645 | 136   | 9    | 15  | AGATCCGGAA  |
| AGATCCGGAAAACGT                                                                                                                                        |                       |   |           |         |       |      |     |             |
| UNSB01.fasta                                                                                                                                           | Cele-UNSB01_1:4344690 | 1 | 4344690   | 4345849 | 1160  | 6    | 226 | ACAAGAAGCT  |
| ACAAGAAGCTTCACGTAGTTACAGAAATAGTAGATTTTTAGCCCTACCTTTTAGAGCGTATTTTATTATTTAATGAAACTACCACTTATAGGCAAAATAGAGGGATTTTCGTAATTTTGAAAATTCATAAATCTCTTCAAAGTAATTT   |                       |   |           |         |       |      |     |             |
| TTTTTGCGAAATGTCTTTTCAGAACTTTGTAGTAAATTTAAGCTCTTTTAGAATATATTAACAATATTCAGTAGGT                                                                           |                       |   |           |         |       |      |     |             |
| UNSB01.fasta                                                                                                                                           | Cele-UNSB01_1:4346155 | 1 | 4346155   | 4359862 | 13708 | 146  | 94  | TCAAAATCTT  |
| TCAAAATCTTCTGTCTCTAAATATTGGGTGCTTTTCGATGCTCTTTGTAGACAAATCAATGGGAAAAATGTCAATTTCTGAAGGCAGTAATTC                                                          |                       |   |           |         |       |      |     |             |
| UNSB01.fasta                                                                                                                                           | Cele-UNSB01_1:4404167 | 1 | 4404167   | 4404863 | 697   | 4    | 174 | CTTCAAGAGC  |
| CTTCAAGAGCTCAGTGTTATTTCTGACATGCCAATCTCGACTCTAGACCTGAACATGTTGCAAGGAGTTGAAGACAACCTGAACAGTCTTCCAAGTGAAGAAAGCTGATAAGATCCGCGAGAAGATTAACGATCTGAGAAGAAGGAAACA |                       |   |           |         |       |      |     |             |
| AGAAAGCGATCTGGCTGAAGCTCTT                                                                                                                              |                       |   |           |         |       |      |     |             |
| UNSB01.fasta                                                                                                                                           | Cele-UNSB01_1:4530676 | 1 | 4530676   | 4530829 | 154   | 8    | 19  | TTTTTCGTGT  |
| TTTTTCGTGTAAACAATCTA                                                                                                                                   |                       |   |           |         |       |      |     |             |
| UNSB01.fasta                                                                                                                                           | Cele-UNSB01_1:4605678 | 1 | 4605678   | 4635032 | 29355 | 1129 | 26  | TTTTCTAAAA  |
| TTTTCTAAAAATCCGCCGAATGCCAT                                                                                                                             |                       |   |           |         |       |      |     |             |
| UNSB01.fasta                                                                                                                                           | Cele-UNSB01_1:4635066 | 1 | 4635066   | 4668893 | 33828 | 1253 | 27  | TGGCTTCCCA  |
| TGGCTTCCCACTATATTTTACTCTCTG                                                                                                                            |                       |   |           |         |       |      |     |             |
| UNSB01.fasta                                                                                                                                           | Cele-UNSB01_1:4669638 | 1 | 4669638   | 4670054 | 417   | 33   | 12  | TTTTTATTTT  |
| TTTTTATTTT                                                                                                                                             |                       |   |           |         |       |      |     |             |
| UNSB01.fasta                                                                                                                                           | Cele-UNSB01_1:4669638 | 1 | 4669638   | 4670196 | 559   | 41   | 12  | TTTTTATTTT  |
| TTTTTATTTT                                                                                                                                             |                       |   |           |         |       |      |     |             |
| UNSB01.fasta                                                                                                                                           | Cele-UNSB01_1:4669638 | 1 | 4669638   | 4670946 | 1309  | 43   | 12  | TTTTTATTTT  |
| TTTTTATTTT                                                                                                                                             |                       |   |           |         |       |      |     |             |
| UNSB01.fasta                                                                                                                                           | Cele-UNSB01_1:4694849 | 1 | 4694849   | 4695647 | 799   | 20   | 40  | CATTCCAGAA  |
| CATTCCAGAAATTTTCTCGATTTTCTAGAAAGTTCTGGAG                                                                                                               |                       |   |           |         |       |      |     |             |
| UNSB01.fasta                                                                                                                                           | Cele-UNSB01_1:4695896 | 1 | 4695896   | 4696451 | 556   | 34   | 15  | GGGTCTCACC  |
| GGGTCTCACCACGGT                                                                                                                                        |                       |   |           |         |       |      |     |             |
| UNSB01.fasta                                                                                                                                           | Cele-UNSB01_1:5080040 | 1 | 5080040   | 5080117 | 78    | 5    | 15  | CGAAAAGGGG  |
| CGAAAAGGGGATCTG                                                                                                                                        |                       |   |           |         |       |      |     |             |
| UNSB01.fasta                                                                                                                                           | Cele-UNSB01_1:5080289 | 1 | 5080289   | 5080381 | 93    | 5    | 15  | CTCCCCTTTT  |
| CTCCCCTTTTCGTAT                                                                                                                                        |                       |   |           |         |       |      |     |             |
| UNSB01.fasta                                                                                                                                           | Cele-UNSB01_1:5082880 | 1 | 5082880</ |         |       |      |     |             |

|                                                                                                                                                     |                        |   |          |          |       |     |     |             |
|-----------------------------------------------------------------------------------------------------------------------------------------------------|------------------------|---|----------|----------|-------|-----|-----|-------------|
| UNSB01.fasta                                                                                                                                        | Cele-UNSB01_1:5700313  | 1 | 5700313  | 5700505  | 193   | 16  | 12  | GAAATTTTTT  |
| GAAATTTTTTCT                                                                                                                                        |                        |   |          |          |       |     |     |             |
| UNSB01.fasta                                                                                                                                        | Cele-UNSB01_1:5758991  | 1 | 5758991  | 5759083  | 93    | 6   | 15  | TCCCCTTTTC  |
| TCCCCTTTTCGTATC                                                                                                                                     |                        |   |          |          |       |     |     |             |
| UNSB01.fasta                                                                                                                                        | Cele-UNSB01_1:5777645  | 1 | 5777645  | 5778359  | 715   | 6   | 119 | GCCACCTTTA  |
| GCCACCTTTAAACCCTAATCCAAGCAGACAGGCCGTAGGCCTGCTAGGCGGTAGCGACACGCTCAAGCCCAACAGTCCGGGATGAGGGTCGCAGGCCCTTACTCTTAGAACTTTAG                                |                        |   |          |          |       |     |     |             |
| UNSB01.fasta                                                                                                                                        | Cele-UNSB01_1:6112428  | 1 | 6112428  | 6113232  | 805   | 18  | 45  | TCTGATCCTT  |
| TCTGATCCTTCAGATAAGAAGGATCGTAAGGGTACCTTCTGATGG                                                                                                       |                        |   |          |          |       |     |     |             |
| UNSB01.fasta                                                                                                                                        | Cele-UNSB01_1:6114632  | 1 | 6114632  | 6114855  | 224   | 5   | 45  | AAGGATCAGA  |
| AAGGATCAGATCATCAGAAGGTACCCATGTGATCCTTCGGAGCTG                                                                                                       |                        |   |          |          |       |     |     |             |
| UNSB01.fasta                                                                                                                                        | Cele-UNSB01_1:6226496  | 1 | 6226496  | 6226583  | 88    | 5   | 17  | AGGTAGTCAA  |
| AGGTAGTCAATGAGCAA                                                                                                                                   |                        |   |          |          |       |     |     |             |
| UNSB01.fasta                                                                                                                                        | Cele-UNSB01_1:6651710  | 1 | 6651710  | 6652545  | 836   | 13  | 30  | TGGTGGAACT  |
| TGGTGGAACTGGATTTCGGCAGTGGAAATGC                                                                                                                     |                        |   |          |          |       |     |     |             |
| UNSB01.fasta                                                                                                                                        | Cele-UNSB01_1:6785229  | 1 | 6785229  | 6785394  | 166   | 11  | 15  | GAGACCCATC  |
| GAGACCCACCGTGGT                                                                                                                                     |                        |   |          |          |       |     |     |             |
| UNSB01.fasta                                                                                                                                        | Cele-UNSB01_1:6785543  | 1 | 6785543  | 6785983  | 441   | 11  | 40  | TTCTGGAATG  |
| TTCTGGAATGTTCCAGAACTTTCTAGAAAAATCGAGAAAA                                                                                                            |                        |   |          |          |       |     |     |             |
| UNSB01.fasta                                                                                                                                        | Cele-UNSB01_1:6909627  | 1 | 6909627  | 6919602  | 9976  | 399 | 25  | GAAGCCAGAG  |
| GAAGCCAGAGAGTAAATTATTATGT                                                                                                                           |                        |   |          |          |       |     |     |             |
| UNSB01.fasta                                                                                                                                        | Cele-UNSB01_1:7000180  | 1 | 7000180  | 7000255  | 76    | 5   | 15  | AGATCCGGAA  |
| AGATCCGGAAAACGT                                                                                                                                     |                        |   |          |          |       |     |     |             |
| UNSB01.fasta                                                                                                                                        | Cele-UNSB01_1:7149236  | 1 | 7149236  | 7149296  | 61    | 4   | 15  | CGAAAAGGGG  |
| CAAAAAGGGGATCTG                                                                                                                                     |                        |   |          |          |       |     |     |             |
| UNSB01.fasta                                                                                                                                        | Cele-UNSB01_1:7886332  | 1 | 7886332  | 7886407  | 76    | 5   | 15  | TCGTGGTGAG  |
| TCGTGGTGAGACCTT                                                                                                                                     |                        |   |          |          |       |     |     |             |
| UNSB01.fasta                                                                                                                                        | Cele-UNSB01_1:7886430  | 1 | 7886430  | 7887346  | 917   | 26  | 35  | GCGGGAAATT  |
| GCGGGAAATCAAATTTTAAGGGAAAAATTTTGTG                                                                                                                  |                        |   |          |          |       |     |     |             |
| UNSB01.fasta                                                                                                                                        | Cele-UNSB01_1:7887436  | 1 | 7887436  | 7887916  | 481   | 13  | 40  | TTTCTAGAAA  |
| TTTCTAGAAAAATCGAGAAATGTCTGCAATGTTCCAGAAG                                                                                                            |                        |   |          |          |       |     |     |             |
| UNSB01.fasta                                                                                                                                        | Cele-UNSB01_1:7925712  | 1 | 7925712  | 7926382  | 671   | 39  | 16  | AATTTTCCG   |
| AATTTTGCCGCGTCTGA                                                                                                                                   |                        |   |          |          |       |     |     |             |
| UNSB01.fasta                                                                                                                                        | Cele-UNSB01_1:8014213  | 1 | 8014213  | 8014468  | 256   | 17  | 15  | ACCCATCGTG  |
| ACCCATCGTGGCGAA                                                                                                                                     |                        |   |          |          |       |     |     |             |
| UNSB01.fasta                                                                                                                                        | Cele-UNSB01_1:8014573  | 1 | 8014573  | 8014958  | 386   | 11  | 35  | GGGAAATTTA  |
| GGGAAATTTAAATTTTCTGTGAAAAATATTTTGGC                                                                                                                 |                        |   |          |          |       |     |     |             |
| UNSB01.fasta                                                                                                                                        | Cele-UNSB01_1:8015067  | 1 | 8015067  | 8016984  | 1918  | 48  | 40  | GAATGTTCCA  |
| GAATGTTCCAGAACTTTCTAGAAAAATCGAGAAAAATTCTG                                                                                                           |                        |   |          |          |       |     |     |             |
| UNSB01.fasta                                                                                                                                        | Cele-UNSB01_1:8640900  | 1 | 8640900  | 8641029  | 130   | 4   | 32  | AAAATCGAAA  |
| AAAATCGAAAAATTCTCGTTTTTCAATTTTAA                                                                                                                    |                        |   |          |          |       |     |     |             |
| UNSB01.fasta                                                                                                                                        | Cele-UNSB01_1:9793063  | 1 | 9793063  | 9794825  | 1763  | 41  | 44  | CTGTTTTCTG  |
| CTGTTTTCTGAGCATTGTAGATTTTCGGATTGATGGCCGAAAGG                                                                                                        |                        |   |          |          |       |     |     |             |
| UNSB01.fasta                                                                                                                                        | Cele-UNSB01_1:9974009  | 1 | 9974009  | 9976809  | 2801  | 15  | 200 | AACAGAATTT  |
| AACAGAATTTTGAAAAATTTTCGAAACCGCAAGTTCAGCAGAAAAAGTGAATTTTCAGTCATACCTTGTTAGACCACAATTTATATACAAAATTAATAGATTTTCCAACTTTTGAAAAATTAATTTCTGGCTTCAAACCTTTTCTAG |                        |   |          |          |       |     |     |             |
| AAATCCCGTTGCCATTTTGTAGCACATTTTATGTTCTTTTCAGAAATTTGAA                                                                                                |                        |   |          |          |       |     |     |             |
| UNSB01.fasta                                                                                                                                        | Cele-UNSB01_1:9977112  | 1 | 9977112  | 9977772  | 661   | 41  | 15  | CACGATGGGT  |
| CACGAAGGTATCAC                                                                                                                                      |                        |   |          |          |       |     |     |             |
| UNSB01.fasta                                                                                                                                        | Cele-UNSB01_1:10089590 | 1 | 10089590 | 10089728 | 139   | 5   | 37  | ATAATTTTTTC |
| ATAATTTTCTTGAGTAATGAGAGACTTTTCATAAT                                                                                                                 |                        |   |          |          |       |     |     |             |
| UNSB01.fasta                                                                                                                                        | Cele-UNSB01_1:10295164 | 1 | 10295164 | 10303189 | 8026  | 319 | 25  | TTACTCTAAT  |
| TTACTCTAATTTTCTGCCAATTTAT                                                                                                                           |                        |   |          |          |       |     |     |             |
| UNSB01.fasta                                                                                                                                        | Cele-UNSB01_1:10374816 | 1 | 10374816 | 10387323 | 12508 | 186 | 68  | AAAACCATTG  |
| AAAACCATTTGCAACTGAATAGGTTGATTGTTTTCTTTCTGAAATTCTAAGAATTTTGTTAAAG                                                                                    |                        |   |          |          |       |     |     |             |
| UNSB01.fasta                                                                                                                                        | Cele-UNSB01_1:10434433 | 1 | 10434433 | 10461186 | 26754 | 116 | 231 | GCTGAATTC   |
| GCTGAATTCAGTTGGGTAAGATGTGACTTCATGGCTGAGTGGAAACATCTTGAACATCATCAGCACGATGTGTAGTGTGAGTGGTCCATCGTATTGATCAGAAATCGGGTAATCAGAATGAGCAGAACTTCTTGAACAATCCAGTAA |                        |   |          |          |       |     |     |             |
| TCTTCAATTTCAATGATGGCTCGTCTCTTCTCCGATTCTTCAATCACAACTGGGATGACATACTCTGGCAGCTTCTCATA                                                                    |                        |   |          |          |       |     |     |             |
| UNSB01.fasta                                                                                                                                        | Cele-UNSB01_1:10475895 | 1 | 10475895 | 10475986 | 92    | 6   | 14  | GCTATACGCT  |
| GCTATACGCTATAC                                                                                                                                      |                        |   |          |          |       |     |     |             |

|                                                                                                                                                     |                        |   |          |          |       |     |     |             |
|-----------------------------------------------------------------------------------------------------------------------------------------------------|------------------------|---|----------|----------|-------|-----|-----|-------------|
| UNSB01.fasta                                                                                                                                        | Cele-UNSB01_1:10588945 | 1 | 10588945 | 10589028 | 84    | 6   | 12  | TAGGCTTAGG  |
| TAGGCTTAGTCT                                                                                                                                        |                        |   |          |          |       |     |     |             |
| UNSB01.fasta                                                                                                                                        | Cele-UNSB01_1:10648848 | 1 | 10648848 | 10654019 | 5172  | 115 | 45  | AAGGATCACA  |
| AAGGATCACAAGGGTAGCTCCTGATGATCTGATCCTTCAGCTTCG                                                                                                       |                        |   |          |          |       |     |     |             |
| UNSB01.fasta                                                                                                                                        | Cele-UNSB01_1:10660173 | 1 | 10660173 | 10660265 | 93    | 6   | 15  | CGAAAAGGGG  |
| CGAAAAGGGGATCTG                                                                                                                                     |                        |   |          |          |       |     |     |             |
| UNSB01.fasta                                                                                                                                        | Cele-UNSB01_1:10660440 | 1 | 10660440 | 10660532 | 93    | 6   | 15  | TCCCTTTTC   |
| TCCCTTTTCGTATC                                                                                                                                      |                        |   |          |          |       |     |     |             |
| UNSB01.fasta                                                                                                                                        | Cele-UNSB01_1:10842122 | 1 | 10842122 | 10842194 | 73    | 4   | 18  | AAAAGTTACA  |
| AAAAGTTACAGTGTCTT                                                                                                                                   |                        |   |          |          |       |     |     |             |
| UNSB01.fasta                                                                                                                                        | Cele-UNSB01_1:11042845 | 1 | 11042845 | 11046757 | 3913  | 24  | 163 | GCATAGTCAA  |
| GCATAGTCAAAAATACAAGAATATGCCTATCAAATTATAATAGTTTGTACGGAAGTATTTTTTAAAAACTTGATAAAAATATATAAAAGCTGATTTTTTAAAAAATTCAAAAGTATGGGAAATCATATGGAATCATTCTTTTTATCT |                        |   |          |          |       |     |     |             |
| CAAAAACTGTTC                                                                                                                                        |                        |   |          |          |       |     |     |             |
| UNSB01.fasta                                                                                                                                        | Cele-UNSB01_1:11104747 | 1 | 11104747 | 11105884 | 1138  | 5   | 94  | TGTAGACAAA  |
| TGTAGACAAATCAATGGGAGAATCATCAATTTCTGAAGGCAGTAATTCTCAAATCTTCTGTTCTCTAAATATGGGTGCTTTTCGATGTCTT                                                         |                        |   |          |          |       |     |     |             |
| UNSB01.fasta                                                                                                                                        | Cele-UNSB01_1:11137320 | 1 | 11137320 | 11159590 | 22271 | 783 | 32  | GCACCAATA   |
| GCACCAATATCACCAATTTAGCACCGATAGA                                                                                                                     |                        |   |          |          |       |     |     |             |
| UNSB01.fasta                                                                                                                                        | Cele-UNSB01_1:11159617 | 1 | 11159617 | 11160082 | 466   | 4   | 26  | TTTTTGAAAA  |
| TTTTTGAAAAATGGCATTGCGGCGGA                                                                                                                          |                        |   |          |          |       |     |     |             |
| UNSB01.fasta                                                                                                                                        | Cele-UNSB01_1:11183622 | 1 | 11183622 | 11184094 | 473   | 10  | 35  | TTGCCGATTT  |
| TTACCGATTGCGCGAATTTTCAATTCGGCAAT                                                                                                                    |                        |   |          |          |       |     |     |             |
| UNSB01.fasta                                                                                                                                        | Cele-UNSB01_1:11199905 | 1 | 11199905 | 11200227 | 323   | 8   | 35  | GCCGGAATTG  |
| GCCGGAATCGAAATTTCCGGCAAATCTACAACT                                                                                                                   |                        |   |          |          |       |     |     |             |
| UNSB01.fasta                                                                                                                                        | Cele-UNSB01_1:11239237 | 1 | 11239237 | 11239369 | 133   | 12  | 11  | TATGCCTAGC  |
| TATGCCTAGCC                                                                                                                                         |                        |   |          |          |       |     |     |             |
| UNSB01.fasta                                                                                                                                        | Cele-UNSB01_1:11267568 | 1 | 11267568 | 11267793 | 226   | 15  | 15  | CGATGCTCCA  |
| CGATGCTCCACCCGG                                                                                                                                     |                        |   |          |          |       |     |     |             |
| UNSB01.fasta                                                                                                                                        | Cele-UNSB01_1:11268535 | 1 | 11268535 | 11268966 | 432   | 11  | 34  | TTCCGGCAAA  |
| TTCCGGCAAATCGGAAATTGCTGGAACTAAAA                                                                                                                    |                        |   |          |          |       |     |     |             |
| UNSB01.fasta                                                                                                                                        | Cele-UNSB01_1:11276130 | 1 | 11276130 | 11276202 | 73    | 6   | 12  | CGATCTCCAC  |
| CGATCTCCACCA                                                                                                                                        |                        |   |          |          |       |     |     |             |
| UNSB01.fasta                                                                                                                                        | Cele-UNSB01_1:11291527 | 1 | 11291527 | 11291639 | 113   | 7   | 14  | AGCTTGAAGC  |
| AGCTTGAAGCTGGA                                                                                                                                      |                        |   |          |          |       |     |     |             |
| UNSB01.fasta                                                                                                                                        | Cele-UNSB01_1:11320046 | 1 | 11320046 | 11320214 | 169   | 4   | 42  | TGCCGGAAAT  |
| TGCCGGAAATTTCAAACCGTCAATTTGTTGATTGCCGATT                                                                                                            |                        |   |          |          |       |     |     |             |
| UNSB01.fasta                                                                                                                                        | Cele-UNSB01_1:11351419 | 1 | 11351419 | 11351614 | 196   | 13  | 15  | TCGTGGTGAG  |
| TCGTAGTGAGACCCA                                                                                                                                     |                        |   |          |          |       |     |     |             |
| UNSB01.fasta                                                                                                                                        | Cele-UNSB01_1:11352081 | 1 | 11352081 | 11352141 | 61    | 5   | 12  | TATACATATA  |
| TATACATATACA                                                                                                                                        |                        |   |          |          |       |     |     |             |
| UNSB01.fasta                                                                                                                                        | Cele-UNSB01_1:11361560 | 1 | 11361560 | 11361658 | 99    | 7   | 14  | AACTACTAAC  |
| AACTACAACTACA                                                                                                                                       |                        |   |          |          |       |     |     |             |
| UNSB01.fasta                                                                                                                                        | Cele-UNSB01_1:11393763 | 1 | 11393763 | 11394894 | 1132  | 15  | 35  | TTCCGGCAAA  |
| TTCCGGCAAATCGGCAAATTGCCGGGACTGAAAAT                                                                                                                 |                        |   |          |          |       |     |     |             |
| UNSB01.fasta                                                                                                                                        | Cele-UNSB01_1:11398081 | 1 | 11398081 | 11398840 | 760   | 4   | 35  | TCGGCAAATT  |
| TCGGCAAATTACGGAAATGAAAATTTCCGGCAAA                                                                                                                  |                        |   |          |          |       |     |     |             |
| UNSB01.fasta                                                                                                                                        | Cele-UNSB01_1:11408393 | 1 | 11408393 | 11409029 | 637   | 9   | 35  | AATTGCCGAA  |
| AATTGCCAAATTTCTCGTTTTTGGCAATTTTCAAA                                                                                                                 |                        |   |          |          |       |     |     |             |
| UNSB01.fasta                                                                                                                                        | Cele-UNSB01_1:11460977 | 1 | 11460977 | 11461721 | 745   | 60  | 12  | CGTTGCGTGT  |
| CGTTGCATGTCG                                                                                                                                        |                        |   |          |          |       |     |     |             |
| UNSB01.fasta                                                                                                                                        | Cele-UNSB01_1:11481110 | 1 | 11481110 | 11481222 | 113   | 7   | 16  | CTACATGCCT  |
| CTACATGCCTATATGC                                                                                                                                    |                        |   |          |          |       |     |     |             |
| UNSB01.fasta                                                                                                                                        | Cele-UNSB01_1:11481110 | 1 | 11481110 | 11482230 | 1121  | 68  | 16  | CTACATGCCT  |
| CTACATGCCTATATGC                                                                                                                                    |                        |   |          |          |       |     |     |             |
| UNSB01.fasta                                                                                                                                        | Cele-UNSB01_1:11519985 | 1 | 11519985 | 11520529 | 545   | 18  | 26  | ACCTACAGTA  |
| ATCTACAGTACCCCTATTCTAGAGTG                                                                                                                          |                        |   |          |          |       |     |     |             |
| UNSB01.fasta                                                                                                                                        | Cele-UNSB01_1:11521003 | 1 | 11521003 | 11522550 | 1548  | 48  | 32  | GCAATTTTTTA |
| GCAATTTTtagGCTAAAAATCACTAAAAAACT                                                                                                                    |                        |   |          |          |       |     |     |             |
| UNSB01.fasta                                                                                                                                        | Cele-UNSB01_1:11550058 | 1 | 11550058 | 11550130 | 73    | 6   | 12  | TATATGTATA  |
| TATATGTATATG                                                                                                                                        |                        |   |          |          |       |     |     |             |



|                                                                                                                                                      |                        |   |          |          |      |     |     |             |
|------------------------------------------------------------------------------------------------------------------------------------------------------|------------------------|---|----------|----------|------|-----|-----|-------------|
| UNSB01.fasta                                                                                                                                         | Cele-UNSB01_1:11556393 | 1 | 11556393 | 11558176 | 1784 | 47  | 35  | GGCAAAATCAG |
| GGCAAAATCAGCAAGTTACCGGAATTGAAAATTTCC                                                                                                                 |                        |   |          |          |      |     |     |             |
| UNSB01.fasta                                                                                                                                         | Cele-UNSB01_1:11564527 | 1 | 11564527 | 11564628 | 102  | 5   | 20  | TGTAACAATC  |
| TGTAACAATCTATTTTTCG                                                                                                                                  |                        |   |          |          |      |     |     |             |
| UNSB01.fasta                                                                                                                                         | Cele-UNSB01_1:11591612 | 1 | 11591612 | 11591946 | 335  | 14  | 20  | AAAAATCAAT  |
| AAAAATCAATAATTTTCATCG                                                                                                                                |                        |   |          |          |      |     |     |             |
| UNSB01.fasta                                                                                                                                         | Cele-UNSB01_1:11592271 | 1 | 11592271 | 11597890 | 5620 | 277 | 20  | ATTGATTTTTT |
| ATTGATTTTTTGAGAAAATT                                                                                                                                 |                        |   |          |          |      |     |     |             |
| UNSB01.fasta                                                                                                                                         | Cele-UNSB01_1:11615647 | 1 | 11615647 | 11616001 | 355  | 10  | 30  | CCTTGGGCTC  |
| CCTTGGGCTCCCTGAGCTCCAAATTGTGTT                                                                                                                       |                        |   |          |          |      |     |     |             |
| UNSB01.fasta                                                                                                                                         | Cele-UNSB01_1:11631541 | 1 | 11631541 | 11632264 | 724  | 15  | 11  | GTACTGTAGG  |
| GTACTGTAGTG                                                                                                                                          |                        |   |          |          |      |     |     |             |
| UNSB01.fasta                                                                                                                                         | Cele-UNSB01_1:11636321 | 1 | 11636321 | 11636670 | 350  | 9   | 35  | ATTCGGGCAA  |
| ATTCGGCAATTTGCCGATTTTCAGAAATTTTCA                                                                                                                    |                        |   |          |          |      |     |     |             |
| UNSB01.fasta                                                                                                                                         | Cele-UNSB01_1:11643779 | 1 | 11643779 | 11644036 | 258  | 6   | 34  | ATGCACCATG  |
| ATGCACCATGCCAAAAATATATCCAAAACCCCG                                                                                                                    |                        |   |          |          |      |     |     |             |
| UNSB01.fasta                                                                                                                                         | Cele-UNSB01_1:11661653 | 1 | 11661653 | 11661731 | 79   | 6   | 12  | AAGCCTAAGC  |
| AAGCCTAAGCCT                                                                                                                                         |                        |   |          |          |      |     |     |             |
| UNSB01.fasta                                                                                                                                         | Cele-UNSB01_1:11662428 | 1 | 11662428 | 11662542 | 115  | 9   | 12  | GCTTAGGCTT  |
| GCTTAGGCTTAG                                                                                                                                         |                        |   |          |          |      |     |     |             |
| UNSB01.fasta                                                                                                                                         | Cele-UNSB01_1:11667166 | 1 | 11667166 | 11667423 | 258  | 6   | 34  | ATGCACCATG  |
| ATGCACCATGCCAAAAATATATCCAAAACCCCG                                                                                                                    |                        |   |          |          |      |     |     |             |
| UNSB01.fasta                                                                                                                                         | Cele-UNSB01_1:11682141 | 1 | 11682141 | 11682225 | 85   | 7   | 12  | GGCTTAGGCT  |
| GGCTTAGGCTTA                                                                                                                                         |                        |   |          |          |      |     |     |             |
| UNSB01.fasta                                                                                                                                         | Cele-UNSB01_1:11685636 | 1 | 11685636 | 11685851 | 216  | 5   | 43  | CGGCAAATCG  |
| CGGCAAATCGCAAACAGCAAGTTGCCAAAAATCAAATTTTC                                                                                                            |                        |   |          |          |      |     |     |             |
| UNSB01.fasta                                                                                                                                         | Cele-UNSB01_1:11691383 | 1 | 11691383 | 11691503 | 121  | 8   | 15  | TCGTGGTGAG  |
| TCGTGGTGAGACCCCT                                                                                                                                     |                        |   |          |          |      |     |     |             |
| UNSB01.fasta                                                                                                                                         | Cele-UNSB01_1:11691539 | 1 | 11691539 | 11692754 | 1216 | 24  | 35  | TGGCGGGAAA  |
| TGGCGGGAAATTCAAATTTTCAGTGAAAAAAATTT                                                                                                                  |                        |   |          |          |      |     |     |             |
| UNSB01.fasta                                                                                                                                         | Cele-UNSB01_1:11696177 | 1 | 11696177 | 11696255 | 79   | 6   | 12  | TAGGTCTAGG  |
| TAGGTCTAGGTC                                                                                                                                         |                        |   |          |          |      |     |     |             |
| UNSB01.fasta                                                                                                                                         | Cele-UNSB01_1:11696998 | 1 | 11696998 | 11697105 | 108  | 5   | 19  | TCAAAAATCA  |
| TCAAAAATCAATAATTTCA                                                                                                                                  |                        |   |          |          |      |     |     |             |
| UNSB01.fasta                                                                                                                                         | Cele-UNSB01_1:11697315 | 1 | 11697315 | 11697448 | 134  | 7   | 19  | TTATCGATTT  |
| TTATCGATTTTCCGGAAA                                                                                                                                   |                        |   |          |          |      |     |     |             |
| UNSB01.fasta                                                                                                                                         | Cele-UNSB01_1:11696961 | 1 | 11696961 | 11698223 | 1263 | 20  | 19  | AAAAATCGAT  |
| AAAAATCAATAATTTTCATC                                                                                                                                 |                        |   |          |          |      |     |     |             |
| UNSB01.fasta                                                                                                                                         | Cele-UNSB01_1:11744458 | 1 | 11744458 | 11744933 | 476  | 17  | 19  | TTTCACAAAA  |
| TTTCACAAAAATCGATAAT                                                                                                                                  |                        |   |          |          |      |     |     |             |
| UNSB01.fasta                                                                                                                                         | Cele-UNSB01_1:11743735 | 1 | 11743735 | 11745857 | 2123 | 45  | 19  | AAAATCGATA  |
| AAAATCGATAATTTCTCAT                                                                                                                                  |                        |   |          |          |      |     |     |             |
| UNSB01.fasta                                                                                                                                         | Cele-UNSB01_1:11752079 | 1 | 11752079 | 11752337 | 259  | 16  | 12  | AAGCCAAAGC  |
| AAGCCAAAGAAT                                                                                                                                         |                        |   |          |          |      |     |     |             |
| UNSB01.fasta                                                                                                                                         | Cele-UNSB01_1:11868010 | 1 | 11868010 | 11868741 | 732  | 60  | 12  | AGGCTCAGGC  |
| AGGGTCAGGCTC                                                                                                                                         |                        |   |          |          |      |     |     |             |
| UNSB01.fasta                                                                                                                                         | Cele-UNSB01_1:11869240 | 1 | 11869240 | 11870103 | 864  | 53  | 16  | GCATGTAGGC  |
| GCATGTAGGCATGTAG                                                                                                                                     |                        |   |          |          |      |     |     |             |
| UNSB01.fasta                                                                                                                                         | Cele-UNSB01_1:11907174 | 1 | 11907174 | 11907313 | 140  | 13  | 11  | TTTTGCACAT  |
| TTTTCCACATT                                                                                                                                          |                        |   |          |          |      |     |     |             |
| UNSB01.fasta                                                                                                                                         | Cele-UNSB01_1:11925845 | 1 | 11925845 | 11930260 | 4416 | 27  | 164 | ATACCAGAAA  |
| ATACCAGAAAATGCCAATCAAAGTATATTAGCTTGTCAGGAAGTAATTTTTTTTTTAATTGATAAAAAATATATAAAAGCTGATTTTTTCAAATTCAAAAGTATGGGAAAGTCAAATGGAGTCATTCTTTTTTATTCTATAAAACTGT |                        |   |          |          |      |     |     |             |
| TTACCATAGTCAAAA                                                                                                                                      |                        |   |          |          |      |     |     |             |
| UNSB01.fasta                                                                                                                                         | Cele-UNSB01_1:11979429 | 1 | 11979429 | 11979575 | 147  | 6   | 11  | AGTACTGTAG  |
| AGTACTGTAGG                                                                                                                                          |                        |   |          |          |      |     |     |             |
| UNSB01.fasta                                                                                                                                         | Cele-UNSB01_1:12045808 | 1 | 12045808 | 12046235 | 428  | 5   | 42  | TCGGCAAATC  |
| TCGGCAAATTCGGCAAATCTACTTTTTTGAAAATTGCCGAGC                                                                                                           |                        |   |          |          |      |     |     |             |
| UNSB01.fasta                                                                                                                                         | Cele-UNSB01_1:12056400 | 1 | 12056400 | 12056477 | 78   | 7   | 11  | CAAAAAATGT  |
| CAAAAAATGTC                                                                                                                                          |                        |   |          |          |      |     |     |             |

|                                                                            |                        |   |          |          |      |     |    |             |
|----------------------------------------------------------------------------|------------------------|---|----------|----------|------|-----|----|-------------|
| UNSB01.fasta                                                               | Cele-UNSB01_1:12149612 | 1 | 12149612 | 12149804 | 193  | 15  | 12 | TTAGGCTTAG  |
| TTACGCTTAGGC                                                               |                        |   |          |          |      |     |    |             |
| UNSB01.fasta                                                               | Cele-UNSB01_1:12200484 | 1 | 12200484 | 12200598 | 115  | 7   | 12 | CTAAGCCTAA  |
| CGAAGCCTAAGC                                                               |                        |   |          |          |      |     |    |             |
| UNSB01.fasta                                                               | Cele-UNSB01_1:12310642 | 1 | 12310642 | 12315079 | 4438 | 373 | 11 | CACATTTTTT  |
| CACATTTTTTG                                                                |                        |   |          |          |      |     |    |             |
| UNSB01.fasta                                                               | Cele-UNSB01_1:12330775 | 1 | 12330775 | 12330985 | 211  | 7   | 30 | GTCATTATCA  |
| GTCATTATCAGCTTCTGGTGTCTTAGAAGA                                             |                        |   |          |          |      |     |    |             |
| UNSB01.fasta                                                               | Cele-UNSB01_1:12340678 | 1 | 12340678 | 12340816 | 139  | 10  | 12 | TAAGCCTAAG  |
| TAAGCCTAAGCT                                                               |                        |   |          |          |      |     |    |             |
| UNSB01.fasta                                                               | Cele-UNSB01_1:12350087 | 1 | 12350087 | 12350549 | 463  | 41  | 11 | TTGCACATTT  |
| TTGCACATTTT                                                                |                        |   |          |          |      |     |    |             |
| UNSB01.fasta                                                               | Cele-UNSB01_1:12396670 | 1 | 12396670 | 12396802 | 133  | 9   | 12 | GCCTAAGCCT  |
| GCCTAAGCCTAT                                                               |                        |   |          |          |      |     |    |             |
| UNSB01.fasta                                                               | Cele-UNSB01_1:12413207 | 1 | 12413207 | 12413533 | 327  | 4   | 73 | AATAAAATAT  |
| AATAAAATATAGAAAATCCTTATGACACACTTAAGCCTAAAGGCCCGGAAAAACATACTAGGATGCCCAACTGG |                        |   |          |          |      |     |    |             |
| UNSB01.fasta                                                               | Cele-UNSB01_1:12444291 | 1 | 12444291 | 12444339 | 49   | 4   | 12 | GCCTAAGCCT  |
| GCCTAAGCCTAG                                                               |                        |   |          |          |      |     |    |             |
| UNSB01.fasta                                                               | Cele-UNSB01_1:12478910 | 1 | 12478910 | 12479068 | 159  | 5   | 34 | ATGCACCATG  |
| ATGCACCGTGTCCAAAAGTATATATAAAATTGCG                                         |                        |   |          |          |      |     |    |             |
| UNSB01.fasta                                                               | Cele-UNSB01_1:12487096 | 1 | 12487096 | 12487168 | 73   | 5   | 12 | GGCTTAGGCT  |
| GGCTTCGGCTTA                                                               |                        |   |          |          |      |     |    |             |
| UNSB01.fasta                                                               | Cele-UNSB01_1:12700590 | 1 | 12700590 | 12700802 | 213  | 16  | 12 | GAAATTTTTT  |
| GAAATTTTTTCC                                                               |                        |   |          |          |      |     |    |             |
| UNSB01.fasta                                                               | Cele-UNSB01_1:12700867 | 1 | 12700867 | 12701490 | 624  | 50  | 12 | AAAAAATTTT  |
| AAAAAATTTTCGG                                                              |                        |   |          |          |      |     |    |             |
| UNSB01.fasta                                                               | Cele-UNSB01_1:12702448 | 1 | 12702448 | 12702698 | 251  | 5   | 50 | ACACATGCTA  |
| ACACATGCTATAACATTGTCTCCTTCTCTAGTGCACGAGAGCGGCCGCC                          |                        |   |          |          |      |     |    |             |
| UNSB01.fasta                                                               | Cele-UNSB01_1:12783664 | 1 | 12783664 | 12784000 | 337  | 20  | 16 | TGATCTGATG  |
| TGATCTGATGATCTCA                                                           |                        |   |          |          |      |     |    |             |
| UNSB01.fasta                                                               | Cele-UNSB01_1:12807224 | 1 | 12807224 | 12807329 | 106  | 5   | 21 | ACCACCCCTA  |
| ACCACTCCTACAACAACCACT                                                      |                        |   |          |          |      |     |    |             |
| UNSB01.fasta                                                               | Cele-UNSB01_1:12834373 | 1 | 12834373 | 12834766 | 394  | 5   | 32 | GCTGATTGGT  |
| GCTGATTGGTTCAAAAGTGGGCTTGGCTTATG                                           |                        |   |          |          |      |     |    |             |
| UNSB01.fasta                                                               | Cele-UNSB01_1:12842011 | 1 | 12842011 | 12842077 | 67   | 5   | 12 | TACCTATACC  |
| TACCTATACCTT                                                               |                        |   |          |          |      |     |    |             |
| UNSB01.fasta                                                               | Cele-UNSB01_1:12905958 | 1 | 12905958 | 12906024 | 67   | 5   | 11 | TTTGGAGCGG  |
| TTCGGAGCGGT                                                                |                        |   |          |          |      |     |    |             |
| UNSB01.fasta                                                               | Cele-UNSB01_1:13114799 | 1 | 13114799 | 13114994 | 196  | 5   | 39 | TATTTTTTAAT |
| TATTTTTTAATTTAACCTACTTAAAAAGTAGGTCATGACC                                   |                        |   |          |          |      |     |    |             |
| UNSB01.fasta                                                               | Cele-UNSB01_1:13115312 | 1 | 13115312 | 13116088 | 777  | 11  | 23 | ACTACAAACT  |
| ACTACAAACTACAACTATGAAA                                                     |                        |   |          |          |      |     |    |             |
| UNSB01.fasta                                                               | Cele-UNSB01_1:13121380 | 1 | 13121380 | 13121635 | 256  | 17  | 15 | AAAAGGGGAT  |
| AAAAGGGGATCTGCG                                                            |                        |   |          |          |      |     |    |             |
| UNSB01.fasta                                                               | Cele-UNSB01_1:13132164 | 1 | 13132164 | 13132288 | 125  | 6   | 21 | AATCCAATAT  |
| AATCAAATATGGTTGAAATCT                                                      |                        |   |          |          |      |     |    |             |
| UNSB01.fasta                                                               | Cele-UNSB01_1:13177981 | 1 | 13177981 | 13178228 | 248  | 13  | 19 | CAAGGCACTA  |
| CAAGGTACTAGAAATGCGC                                                        |                        |   |          |          |      |     |    |             |
| UNSB01.fasta                                                               | Cele-UNSB01_1:13199796 | 1 | 13199796 | 13200258 | 463  | 10  | 35 | GCCGGAAATT  |
| GCCGGAAATTTTCAATTCTGGCAGTTTACCAATT                                         |                        |   |          |          |      |     |    |             |
| UNSB01.fasta                                                               | Cele-UNSB01_1:13236201 | 1 | 13236201 | 13236854 | 654  | 16  | 35 | ATTGCCGGAA  |
| ATTGCCGGAAATTGAAAAATGCAGCAAATCGGCAT                                        |                        |   |          |          |      |     |    |             |
| UNSB01.fasta                                                               | Cele-UNSB01_1:13241763 | 1 | 13241763 | 13242154 | 392  | 8   | 14 | AGTTTGTAGT  |
| AGTCTGTAGTTGT                                                              |                        |   |          |          |      |     |    |             |
| UNSB01.fasta                                                               | Cele-UNSB01_1:13307625 | 1 | 13307625 | 13307715 | 91   | 4   | 22 | TCGAGAAAAA  |
| TCGAGAAAAAATCTGAAAAAAT                                                     |                        |   |          |          |      |     |    |             |
| UNSB01.fasta                                                               | Cele-UNSB01_1:13315136 | 1 | 13315136 | 13315216 | 81   | 5   | 16 | AATACGGGAA  |
| AATACGGGAATACGGG                                                           |                        |   |          |          |      |     |    |             |

|                                                                                                                                                |                        |   |          |          |       |     |     |             |
|------------------------------------------------------------------------------------------------------------------------------------------------|------------------------|---|----------|----------|-------|-----|-----|-------------|
| UNSB01.fasta                                                                                                                                   | Cele-UNSB01_1:13324034 | 1 | 13324034 | 13324147 | 114   | 5   | 22  | TTTTTCTCTCG |
| TTTTTCTCTCGAATTTTTCAGA                                                                                                                         |                        |   |          |          |       |     |     |             |
| UNSB01.fasta                                                                                                                                   | Cele-UNSB01_1:13379937 | 1 | 13379937 | 13380822 | 886   | 18  | 39  | TTAAAAAGTA  |
| TTAAAAAGTAGGTCATGACCTAATTTTAATATGACCTAC                                                                                                        |                        |   |          |          |       |     |     |             |
| UNSB01.fasta                                                                                                                                   | Cele-UNSB01_1:13456302 | 1 | 13456302 | 13456675 | 374   | 12  | 11  | GTACTGTAGG  |
| GTACTGTAGGA                                                                                                                                    |                        |   |          |          |       |     |     |             |
| UNSB01.fasta                                                                                                                                   | Cele-UNSB01_1:13456767 | 1 | 13456767 | 13461871 | 5105  | 124 | 40  | AATGTTCCAG  |
| AATGTTCCAGAACTTTCTAGAAAAATCGAGAAAATTCTGA                                                                                                       |                        |   |          |          |       |     |     |             |
| UNSB01.fasta                                                                                                                                   | Cele-UNSB01_1:13507191 | 1 | 13507191 | 13507550 | 360   | 18  | 20  | AAAATAGATT  |
| AAAATAGATTGTTACACGAA                                                                                                                           |                        |   |          |          |       |     |     |             |
| UNSB01.fasta                                                                                                                                   | Cele-UNSB01_1:13507576 | 1 | 13507576 | 13507758 | 183   | 7   | 26  | CTCTGGCAGT  |
| CTCTGGCAGTTCACTAAAATAAGTGA                                                                                                                     |                        |   |          |          |       |     |     |             |
| UNSB01.fasta                                                                                                                                   | Cele-UNSB01_1:13634561 | 1 | 13634561 | 13638668 | 4108  | 158 | 26  | TTTTAGGTGA  |
| TTTTAGGTGAATGGTTAGAGTCATAA                                                                                                                     |                        |   |          |          |       |     |     |             |
| UNSB01.fasta                                                                                                                                   | Cele-UNSB01_1:13683275 | 1 | 13683275 | 13683450 | 176   | 5   | 35  | TGAAAAATTC  |
| TGAAAAATTCGGCAAAACGGCAAATTTTCGAAAA                                                                                                             |                        |   |          |          |       |     |     |             |
| UNSB01.fasta                                                                                                                                   | Cele-UNSB01_1:13729567 | 1 | 13729567 | 13730578 | 1012  | 11  | 14  | TAGTTTGTAG  |
| TAGTTTGTAGTTG                                                                                                                                  |                        |   |          |          |       |     |     |             |
| UNSB01.fasta                                                                                                                                   | Cele-UNSB01_1:13730896 | 1 | 13730896 | 13731271 | 376   | 11  | 14  | TACAAACTAC  |
| TATAAACTACAAAC                                                                                                                                 |                        |   |          |          |       |     |     |             |
| UNSB01.fasta                                                                                                                                   | Cele-UNSB01_1:13831060 | 1 | 13831060 | 13832042 | 983   | 52  | 14  | TGTAGTATGT  |
| TGTAGTATGTAGTT                                                                                                                                 |                        |   |          |          |       |     |     |             |
| UNSB01.fasta                                                                                                                                   | Cele-UNSB01_1:13840435 | 1 | 13840435 | 13852243 | 11809 | 369 | 32  | TGAATTCCCG  |
| TGAATTCCCGCCAAAACCTTTTCACAGAAAATT                                                                                                              |                        |   |          |          |       |     |     |             |
| UNSB01.fasta                                                                                                                                   | Cele-UNSB01_1:13852339 | 1 | 13852339 | 13853459 | 1121  | 28  | 40  | GAATTTTCTC  |
| GAATTTTCTCGAATTTTCCAGAAGGTTCTGGAGCATTCCA                                                                                                       |                        |   |          |          |       |     |     |             |
| UNSB01.fasta                                                                                                                                   | Cele-UNSB01_1:13927551 | 1 | 13927551 | 13927713 | 163   | 13  | 12  | TATACCTATA  |
| TATACCTATACC                                                                                                                                   |                        |   |          |          |       |     |     |             |
| UNSB01.fasta                                                                                                                                   | Cele-UNSB01_1:13927986 | 1 | 13927986 | 13928124 | 139   | 11  | 12  | ATAGGTATAG  |
| ATAGGTATAGGC                                                                                                                                   |                        |   |          |          |       |     |     |             |
| UNSB01.fasta                                                                                                                                   | Cele-UNSB01_1:14006347 | 1 | 14006347 | 14006515 | 169   | 7   | 21  | CAAAATTCGT  |
| CAAAATTCGCCCAAAAATGCT                                                                                                                          |                        |   |          |          |       |     |     |             |
| UNSB01.fasta                                                                                                                                   | Cele-UNSB01_1:14038349 | 1 | 14038349 | 14038662 | 314   | 9   | 35  | AATTCGGCA   |
| AATTCGCCCAATTTGCCGATTTGCCGAAAAATTA                                                                                                             |                        |   |          |          |       |     |     |             |
| UNSB01.fasta                                                                                                                                   | Cele-UNSB01_1:14122632 | 1 | 14122632 | 14123925 | 1294  | 19  | 68  | TTGGTTGAGG  |
| TTGGTTGAGGCTAGAAAATGTTGTAGTTGTAGTGTGTAGCCTCAACCAAAATTAATTTTTTTTAA                                                                              |                        |   |          |          |       |     |     |             |
| UNSB01.fasta                                                                                                                                   | Cele-UNSB01_1:14164675 | 1 | 14164675 | 14164835 | 161   | 8   | 20  | AAAAAATAGA  |
| AAAAAATAGATTAGCATACC                                                                                                                           |                        |   |          |          |       |     |     |             |
| UNSB01.fasta                                                                                                                                   | Cele-UNSB01_1:14166580 | 1 | 14166580 | 14166640 | 61    | 5   | 12  | GCCTAAGCCT  |
| GCCTAAGCCTAC                                                                                                                                   |                        |   |          |          |       |     |     |             |
| UNSB01.fasta                                                                                                                                   | Cele-UNSB01_1:14168111 | 1 | 14168111 | 14168331 | 221   | 5   | 63  | TTTTTGACTA  |
| TTTTTGACTACGAGTGTCTTTTTCGCTACTGAGCGAAAAATAGCTACATTTCGCACCTTTTGTC                                                                               |                        |   |          |          |       |     |     |             |
| UNSB01.fasta                                                                                                                                   | Cele-UNSB01_1:14174364 | 1 | 14174364 | 14175224 | 861   | 15  | 64  | GTAGTCAAAA  |
| GTAGTCAAAAAGTCAAAAGTGCGAATGTAGCTATTTTTCAGTCAGTAGCGAAAAAGACATTCA                                                                                |                        |   |          |          |       |     |     |             |
| UNSB01.fasta                                                                                                                                   | Cele-UNSB01_1:14199204 | 1 | 14199204 | 14199288 | 85    | 4   | 21  | ATATTTTGTG  |
| ATATTTTGTGACATTTTATT                                                                                                                           |                        |   |          |          |       |     |     |             |
| UNSB01.fasta                                                                                                                                   | Cele-UNSB01_1:14207225 | 1 | 14207225 | 14207295 | 71    | 6   | 10  | GATTTTCATA  |
| GATTTTCATA                                                                                                                                     |                        |   |          |          |       |     |     |             |
| UNSB01.fasta                                                                                                                                   | Cele-UNSB01_1:14240945 | 1 | 14240945 | 14242222 | 1278  | 80  | 16  | ATCTAAGGAT  |
| ATCTAAGGATCTAAGG                                                                                                                               |                        |   |          |          |       |     |     |             |
| UNSB01.fasta                                                                                                                                   | Cele-UNSB01_1:14240945 | 1 | 14240945 | 14243302 | 2358  | 147 | 16  | ATCTAAGGAT  |
| ATCTAAGGATCTAAGG                                                                                                                               |                        |   |          |          |       |     |     |             |
| UNSB01.fasta                                                                                                                                   | Cele-UNSB01_1:14245984 | 1 | 14245984 | 14247232 | 1249  | 59  | 16  | AGATCCTTAG  |
| AGATCCTTAGATCCTT                                                                                                                               |                        |   |          |          |       |     |     |             |
| UNSB01.fasta                                                                                                                                   | Cele-UNSB01_1:14248002 | 1 | 14248002 | 14248098 | 97    | 6   | 16  | AGGATCTAAG  |
| AGGATCTAAGGATCTA                                                                                                                               |                        |   |          |          |       |     |     |             |
| UNSB01.fasta                                                                                                                                   | Cele-UNSB01_1:14266018 | 1 | 14266018 | 14266935 | 918   | 5   | 179 | CTACCCAAAT  |
| CTACCCAAATTTTTGAAATTTGGAAATTTTCAAAAATCTCAAATTTTAAAAATCCATAATTCAGCCAATTTTGAGATTTTCAGATATTTTAAATTGAAAATCTGTTTGTCTTATCCATTAACTATATCGCTGCATCTACATT |                        |   |          |          |       |     |     |             |
| TTTCACAGTACCCCATGACTTTTCCCGATT                                                                                                                 |                        |   |          |          |       |     |     |             |

|                                                                                                                                                          |                        |   |          |          |      |     |     |             |
|----------------------------------------------------------------------------------------------------------------------------------------------------------|------------------------|---|----------|----------|------|-----|-----|-------------|
| UNSB01.fasta                                                                                                                                             | Cele-UNSB01_1:14275073 | 1 | 14275073 | 14275913 | 841  | 24  | 40  | TTCTGGAAAA  |
| TTCTGGAAAAATTTAGAAAAATTCGGGAATGTTCTGGAACC                                                                                                                |                        |   |          |          |      |     |     |             |
| UNSB01.fasta                                                                                                                                             | Cele-UNSB01_1:14343732 | 1 | 14343732 | 14344621 | 890  | 4   | 62  | GTAGTTTGTA  |
| GTAGTTTGTAGTGTGAGCCTCAACCAACTAGCCAAAGCTTGAGTGAGGCTATGGTGATTTT                                                                                            |                        |   |          |          |      |     |     |             |
| UNSB01.fasta                                                                                                                                             | Cele-UNSB01_1:14381938 | 1 | 14381938 | 14382071 | 134  | 7   | 19  | CCCTGATACC  |
| CCCTGATACCCCGGTCCC                                                                                                                                       |                        |   |          |          |      |     |     |             |
| UNSB01.fasta                                                                                                                                             | Cele-UNSB01_1:14392151 | 1 | 14392151 | 14393037 | 887  | 5   | 177 | CTAACAAAAAT |
| CTAACAAAAATAATTAGCGTAAAAATTTCTACATTTTACTAGTTAACAAATATTTTGATAGCATCAGTGGGTTTTGAGATACAGAAGTTATAAGATGTACGTCCAAAAATGATTGTGAGCTGCTTTATCAAAAAATTACCATAACTTTTTTA |                        |   |          |          |      |     |     |             |
| CTCACTAACGGTATCAAAAATGTTTTAA                                                                                                                             |                        |   |          |          |      |     |     |             |
| UNSB01.fasta                                                                                                                                             | Cele-UNSB01_1:14511380 | 1 | 14511380 | 14511819 | 440  | 17  | 22  | GCACGGCCTG  |
| GCATGGCCTGACGGTCCTGAGG                                                                                                                                   |                        |   |          |          |      |     |     |             |
| UNSB01.fasta                                                                                                                                             | Cele-UNSB01_1:14535288 | 1 | 14535288 | 14535435 | 148  | 8   | 15  | GGGGGCAACA  |
| GGGGGCAACAAATTA                                                                                                                                          |                        |   |          |          |      |     |     |             |
| UNSB01.fasta                                                                                                                                             | Cele-UNSB01_1:14537614 | 1 | 14537614 | 14537761 | 148  | 8   | 15  | TGTTGCCCCC  |
| TGTTGACCCCTATTA                                                                                                                                          |                        |   |          |          |      |     |     |             |
| UNSB01.fasta                                                                                                                                             | Cele-UNSB01_1:14566637 | 1 | 14566637 | 14566717 | 81   | 4   | 20  | ATATCAAAAA  |
| ATACCAAAAAATAGATTGGC                                                                                                                                     |                        |   |          |          |      |     |     |             |
| UNSB01.fasta                                                                                                                                             | Cele-UNSB01_1:14568940 | 1 | 14568940 | 14569168 | 229  | 4   | 14  | TGTAGTTTGT  |
| TGTAGTTTGTAGTG                                                                                                                                           |                        |   |          |          |      |     |     |             |
| UNSB01.fasta                                                                                                                                             | Cele-UNSB01_1:14574460 | 1 | 14574460 | 14574865 | 406  | 4   | 101 | GCATTTGCAT  |
| GCATTTGCATATAGAGATCAGATAAAAGTTAGAATTTTCCAGCCGTTGCAAGTGCCTCTATTGAGAACATTTTGAAAATTGAATGTTTTCAAATTAGAGC                                                     |                        |   |          |          |      |     |     |             |
| UNSB01.fasta                                                                                                                                             | Cele-UNSB01_1:14577219 | 1 | 14577219 | 14577388 | 170  | 5   | 23  | GCACCATAAG  |
| GCATCATAAGGACTCTAGTTGAT                                                                                                                                  |                        |   |          |          |      |     |     |             |
| UNSB01.fasta                                                                                                                                             | Cele-UNSB01_1:14582954 | 1 | 14582954 | 14583490 | 537  | 26  | 18  | TTGTAGATCA  |
| TTGTAGATCAACGGGGTC                                                                                                                                       |                        |   |          |          |      |     |     |             |
| UNSB01.fasta                                                                                                                                             | Cele-UNSB01_1:14647518 | 1 | 14647518 | 14647641 | 124  | 4   | 11  | GTACTGTAGG  |
| GTACTGTAGGA                                                                                                                                              |                        |   |          |          |      |     |     |             |
| UNSB01.fasta                                                                                                                                             | Cele-UNSB01_1:14648049 | 1 | 14648049 | 14648258 | 210  | 6   | 35  | AATTTAAATT  |
| AATTTAAATTTTCTGAAAAAATATTTTGGAGGGA                                                                                                                       |                        |   |          |          |      |     |     |             |
| UNSB01.fasta                                                                                                                                             | Cele-UNSB01_1:14674978 | 1 | 14674978 | 14675094 | 117  | 10  | 12  | ATATGTATAT  |
| ATATGTATTTGT                                                                                                                                             |                        |   |          |          |      |     |     |             |
| UNSB01.fasta                                                                                                                                             | Cele-UNSB01_1:14687699 | 1 | 14687699 | 14688279 | 581  | 8   | 73  | TGTCGGCCGC  |
| TGTCGGCCGCTCTAACTATTTTGCATACACCAAGCTACTTGTTCACGCCAAGCTGCGGAACCTCGAAAG                                                                                    |                        |   |          |          |      |     |     |             |
| UNSB01.fasta                                                                                                                                             | Cele-UNSB01_1:14694045 | 1 | 14694045 | 14694325 | 281  | 8   | 35  | AAAATTTCCG  |
| AAAATTTCCGGCAAATCGGCAATTTACCGAAAGTG                                                                                                                      |                        |   |          |          |      |     |     |             |
| UNSB01.fasta                                                                                                                                             | Cele-UNSB01_1:14697056 | 1 | 14697056 | 14704541 | 7486 | 214 | 35  | GAAATTTTCA  |
| GAAATTTTCACTTTTCGGTAAACTGCCGATTTACCG                                                                                                                     |                        |   |          |          |      |     |     |             |
| UNSB01.fasta                                                                                                                                             | Cele-UNSB01_1:14726982 | 1 | 14726982 | 14727102 | 121  | 6   | 20  | GTGAAATTTT  |
| GTGAAATTTTAAATTTTGA                                                                                                                                      |                        |   |          |          |      |     |     |             |
| UNSB01.fasta                                                                                                                                             | Cele-UNSB01_1:14731269 | 1 | 14731269 | 14731934 | 666  | 19  | 35  | GAAATTTTCC  |
| GAAATTTTCCGGCAACCCGGCAAATTGCCGGAATC                                                                                                                      |                        |   |          |          |      |     |     |             |
| UNSB01.fasta                                                                                                                                             | Cele-UNSB01_1:14804070 | 1 | 14804070 | 14804449 | 380  | 9   | 43  | TTTGCCGGTT  |
| TTTGCCGGTTTGCCGATTTGCCGAAATTTTATTTTCGGCAC                                                                                                                |                        |   |          |          |      |     |     |             |
| UNSB01.fasta                                                                                                                                             | Cele-UNSB01_1:14869199 | 1 | 14869199 | 14869444 | 246  | 6   | 35  | CAAATCGGCA  |
| CAAATCGGCAAATTTTCGGAATTGAAAAATTTTCGG                                                                                                                     |                        |   |          |          |      |     |     |             |
| UNSB01.fasta                                                                                                                                             | Cele-UNSB01_1:14918515 | 1 | 14918515 | 14918575 | 61   | 4   | 15  | CCACGATGGG  |
| CCACGATGGGTCTCT                                                                                                                                          |                        |   |          |          |      |     |     |             |
| UNSB01.fasta                                                                                                                                             | Cele-UNSB01_1:14918627 | 1 | 14918627 | 14918817 | 191  | 5   | 40  | CCAGAAGGTT  |
| CCAGAAGGTTCTAGAACAATCCAGAATTTTTCGAATTTT                                                                                                                  |                        |   |          |          |      |     |     |             |
| UNSB01.fasta                                                                                                                                             | Cele-UNSB01_1:14936456 | 1 | 14936456 | 14937856 | 1401 | 35  | 40  | TTTCTAGAAA  |
| TTTCTAGAAAGTTCTGGAGCATTCAGAATTTTCTCGATT                                                                                                                  |                        |   |          |          |      |     |     |             |
| UNSB01.fasta                                                                                                                                             | Cele-UNSB01_1:15014974 | 1 | 15014974 | 15015203 | 230  | 5   | 34  | GAAATTTCAA  |
| GAAACTTCAACTCCTGCAAATTGCCGATTGCGC                                                                                                                        |                        |   |          |          |      |     |     |             |
| UNSB01.fasta                                                                                                                                             | Cele-UNSB01_1:15023397 | 1 | 15023397 | 15024044 | 648  | 19  | 34  | CGGAAATTTTC |
| CGGTAATTTCAATTCGGCAAGTTGCCGATTTCC                                                                                                                        |                        |   |          |          |      |     |     |             |
| UNSB01.fasta                                                                                                                                             | Cele-UNSB01_1:15062491 | 1 | 15062491 | 15062841 | 351  | 10  | 35  | AATTCGGCA   |
| AATTACGGCACTTTGTCGATTTTCTGAAATTTTC                                                                                                                       |                        |   |          |          |      |     |     |             |
| UNSB01.fasta                                                                                                                                             | Cele-UNSB01_1:15073460 | 1 | 15073460 | 15073709 | 250  | 7   | 35  | CGGTTTGGGA  |
| CGGTTTGGGAAATTTTCGGTAATTTTGACAAATTGC                                                                                                                     |                        |   |          |          |      |     |     |             |



|                                                                                                                                                       |                       |   |         |         |      |     |     |             |
|-------------------------------------------------------------------------------------------------------------------------------------------------------|-----------------------|---|---------|---------|------|-----|-----|-------------|
| UNSB01.fasta                                                                                                                                          | Cele-UNSB01_2:891851  | 2 | 891851  | 892689  | 839  | 4   | 184 | GTTCAAAAGA  |
| GTTCAAAAGATACAAAATTTATCTACACATCTACAAGTTAACTTGCAACTTAGTTAACCAAATTCAAAAGTTATGAGCCGGGGAAGCTATAATAACCAACGTTTCACACTAAAAAGCCCCAAAAAATTCGAAAAATCATTTTTATCTCA |                       |   |         |         |      |     |     |             |
| TGACGGGACAAGCTACAAATGTCTAGTTAGGCTT                                                                                                                    |                       |   |         |         |      |     |     |             |
| UNSB01.fasta                                                                                                                                          | Cele-UNSB01_2:894739  | 2 | 894739  | 894896  | 158  | 8   | 20  | CAATCTATTT  |
| CAATCTATTTTCTGGTATGC                                                                                                                                  |                       |   |         |         |      |     |     |             |
| UNSB01.fasta                                                                                                                                          | Cele-UNSB01_2:898652  | 2 | 898652  | 902061  | 3410 | 58  | 59  | TATGGAAAAT  |
| TATGGAAAATATGGATTTTAAATGTGCACTGGTTTTCAAATTTTTTAAACTGAGAAT                                                                                             |                       |   |         |         |      |     |     |             |
| UNSB01.fasta                                                                                                                                          | Cele-UNSB01_2:1043954 | 2 | 1043954 | 1044457 | 504  | 17  | 11  | GTACTGTAGG  |
| GTACTGTAGTA                                                                                                                                           |                       |   |         |         |      |     |     |             |
| UNSB01.fasta                                                                                                                                          | Cele-UNSB01_2:1044642 | 2 | 1044642 | 1047492 | 2851 | 181 | 15  | TCGTGGTGAG  |
| TCGTGGTGAGATCCA                                                                                                                                       |                       |   |         |         |      |     |     |             |
| UNSB01.fasta                                                                                                                                          | Cele-UNSB01_2:1097712 | 2 | 1097712 | 1098091 | 380  | 5   | 26  | GTCGGCTGCT  |
| GTCGGCTGCTTTTTTTTGCAAAAGT                                                                                                                             |                       |   |         |         |      |     |     |             |
| UNSB01.fasta                                                                                                                                          | Cele-UNSB01_2:1142725 | 2 | 1142725 | 1142802 | 78   | 5   | 15  | CGAAAAGGGG  |
| CGAAAAGGGGATCTG                                                                                                                                       |                       |   |         |         |      |     |     |             |
| UNSB01.fasta                                                                                                                                          | Cele-UNSB01_2:1142992 | 2 | 1142992 | 1143084 | 93   | 6   | 15  | TCCCTTTTTTC |
| TCCCTTTTTCGTATC                                                                                                                                       |                       |   |         |         |      |     |     |             |
| UNSB01.fasta                                                                                                                                          | Cele-UNSB01_2:1186731 | 2 | 1186731 | 1187015 | 285  | 8   | 26  | TACTGTAGTT  |
| TACTGTAGTTTGACTAACTTAGGACT                                                                                                                            |                       |   |         |         |      |     |     |             |
| UNSB01.fasta                                                                                                                                          | Cele-UNSB01_2:1212949 | 2 | 1212949 | 1213169 | 221  | 4   | 55  | GGGATTATTG  |
| GGGATTATTGGAGTTTCTTTTCTAGAAATTTTGAAAATTTTGACAGTTTTTT                                                                                                  |                       |   |         |         |      |     |     |             |
| UNSB01.fasta                                                                                                                                          | Cele-UNSB01_2:1233155 | 2 | 1233155 | 1233235 | 81   | 5   | 12  | TTAGGCTTAG  |
| TTAGGCTTAGGT                                                                                                                                          |                       |   |         |         |      |     |     |             |
| UNSB01.fasta                                                                                                                                          | Cele-UNSB01_2:1258661 | 2 | 1258661 | 1259567 | 907  | 73  | 12  | CTATGCCTAT  |
| CTATGCCTATGC                                                                                                                                          |                       |   |         |         |      |     |     |             |
| UNSB01.fasta                                                                                                                                          | Cele-UNSB01_2:1261170 | 2 | 1261170 | 1261684 | 515  | 42  | 12  | CTATGCCTAT  |
| CTATGCCTATGC                                                                                                                                          |                       |   |         |         |      |     |     |             |
| UNSB01.fasta                                                                                                                                          | Cele-UNSB01_2:1316328 | 2 | 1316328 | 1316758 | 431  | 7   | 63  | GGTCTGCTAA  |
| GGTCTGCTAAATCGAACTTGTAAGTTTGTAGTCTAGCAGACCAAATTTCTTCAAACTACTTG                                                                                        |                       |   |         |         |      |     |     |             |
| UNSB01.fasta                                                                                                                                          | Cele-UNSB01_2:1327419 | 2 | 1327419 | 1327790 | 372  | 5   | 73  | AGTTTGTAGT  |
| ACTTTGTAGTTTGTAGTCTAGCAGACCAAATTTATTAATACTGCAGAAAATTGATGGGTCTGCTAATTAAG                                                                               |                       |   |         |         |      |     |     |             |
| UNSB01.fasta                                                                                                                                          | Cele-UNSB01_2:1412228 | 2 | 1412228 | 1413706 | 1479 | 12  | 63  | TAGTTTGTAG  |
| TAGTTTGTAGTCTAGCAGACCATATTTCTTCAAACCCCATAGGTCTGCTAAATCGAACTTT                                                                                         |                       |   |         |         |      |     |     |             |
| UNSB01.fasta                                                                                                                                          | Cele-UNSB01_2:1416594 | 2 | 1416594 | 1416934 | 341  | 5   | 59  | CTACAAACTA  |
| CTACAAACTACAAAAGCCTATTTAGCAGACCCACGCCAACTTCTGATGGGTCTGCTAGA                                                                                           |                       |   |         |         |      |     |     |             |
| UNSB01.fasta                                                                                                                                          | Cele-UNSB01_2:1422798 | 2 | 1422798 | 1423926 | 1129 | 9   | 63  | TTGGTCTGCT  |
| TTGGTCTGCTAGACTACAACTACAACTTTGTATTTAGCAGACCCATGGGGTTTTGAAGAAAA                                                                                        |                       |   |         |         |      |     |     |             |
| UNSB01.fasta                                                                                                                                          | Cele-UNSB01_2:1429641 | 2 | 1429641 | 1430207 | 567  | 41  | 12  | CCTATGCCTA  |
| CCTATGCCTATG                                                                                                                                          |                       |   |         |         |      |     |     |             |
| UNSB01.fasta                                                                                                                                          | Cele-UNSB01_2:1488365 | 2 | 1488365 | 1488455 | 91   | 5   | 18  | GGAGGTCCAG  |
| GGAGGTCCAGGAACCCCT                                                                                                                                    |                       |   |         |         |      |     |     |             |
| UNSB01.fasta                                                                                                                                          | Cele-UNSB01_2:1507976 | 2 | 1507976 | 1508324 | 349  | 19  | 15  | GGGGCAACA   |
| GGGGCAACAAAAA                                                                                                                                         |                       |   |         |         |      |     |     |             |
| UNSB01.fasta                                                                                                                                          | Cele-UNSB01_2:1517382 | 2 | 1517382 | 1518287 | 906  | 6   | 150 | TTGCAACATG  |
| TTGCAACATGCGGCCGCGGGAATTTGAATTTTGGGTCCAAAACACGTTTTTCGACTAATTTTTCATATTTTCAAGCTAAATTATGATAGAAAATTCGAATTTTCACTAAAAATCGGCAATTTTCAGATTTTCTCACTGGGGCGCA     |                       |   |         |         |      |     |     |             |
| T                                                                                                                                                     |                       |   |         |         |      |     |     |             |
| UNSB01.fasta                                                                                                                                          | Cele-UNSB01_2:1585165 | 2 | 1585165 | 1585860 | 696  | 7   | 96  | GGCCTGCGGC  |
| GGCCTGCGGCCCTCAAACCTGGTTATTAGGCTTGAGTGAATAACATATCTGCTTAGAATAGGATCAAAGCCAGCCCATAGTTTCCAAGAGTGTTCG                                                      |                       |   |         |         |      |     |     |             |
| UNSB01.fasta                                                                                                                                          | Cele-UNSB01_2:1599041 | 2 | 1599041 | 1599824 | 784  | 24  | 23  | CGCTGTAAGA  |
| CGCTGTAAGACCATTTGCTGTAT                                                                                                                               |                       |   |         |         |      |     |     |             |
| UNSB01.fasta                                                                                                                                          | Cele-UNSB01_2:1617453 | 2 | 1617453 | 1617521 | 69   | 4   | 17  | TCATTCCGTG  |
| TCATTCCGTGATTATTT                                                                                                                                     |                       |   |         |         |      |     |     |             |
| UNSB01.fasta                                                                                                                                          | Cele-UNSB01_2:1625642 | 2 | 1625642 | 1627656 | 2015 | 131 | 14  | GATCCTAGAT  |
| GATCCTAGATCCTA                                                                                                                                        |                       |   |         |         |      |     |     |             |
| UNSB01.fasta                                                                                                                                          | Cele-UNSB01_2:1652802 | 2 | 1652802 | 1653206 | 405  | 5   | 42  | TTGCCGGTTG  |
| TTGCCGGTTGCCGAAGTTTTCAGCGTTTCGACAACTTCGGCAA                                                                                                           |                       |   |         |         |      |     |     |             |
| UNSB01.fasta                                                                                                                                          | Cele-UNSB01_2:1657514 | 2 | 1657514 | 1657909 | 396  | 5   | 42  | CAACCGGCAA  |
| CAACCGGCAATTGCCGAAGTTGTCTGACGCTGAAAACCTTCGG                                                                                                           |                       |   |         |         |      |     |     |             |

|                                                                                                                                                   |                       |   |         |         |      |    |     |            |
|---------------------------------------------------------------------------------------------------------------------------------------------------|-----------------------|---|---------|---------|------|----|-----|------------|
| UNSB01.fasta                                                                                                                                      | Cele-UNSB01_2:1681965 | 2 | 1681965 | 1682083 | 119  | 7  | 17  | GATGCCCCCT |
| GATGCCCCCTCTGAACG                                                                                                                                 |                       |   |         |         |      |    |     |            |
| UNSB01.fasta                                                                                                                                      | Cele-UNSB01_2:1815608 | 2 | 1815608 | 1815814 | 207  | 6  | 34  | ATTTGAATTT |
| ATTTGAATTTCCCGCAAAATTTTTCAGTGAAA                                                                                                                  |                       |   |         |         |      |    |     |            |
| UNSB01.fasta                                                                                                                                      | Cele-UNSB01_2:1818966 | 2 | 1818966 | 1819342 | 377  | 11 | 34  | CGGGAAATTC |
| CGGGAAATTCAAATTTTCAGTGAAAAATTTTGC                                                                                                                 |                       |   |         |         |      |    |     |            |
| UNSB01.fasta                                                                                                                                      | Cele-UNSB01_2:1881035 | 2 | 1881035 | 1881350 | 316  | 5  | 65  | TATCGAGAGA |
| TATCGAGAGAAATGCTCTACATTCACTTTGAATTTCTTTTCCAATTTCAATAAGACTCTCAGTAAG                                                                                |                       |   |         |         |      |    |     |            |
| UNSB01.fasta                                                                                                                                      | Cele-UNSB01_2:1915179 | 2 | 1915179 | 1915855 | 677  | 26 | 26  | ATTTACGGAG |
| ATTTACGGAGCTTCAAGTTAATGTTG                                                                                                                        |                       |   |         |         |      |    |     |            |
| UNSB01.fasta                                                                                                                                      | Cele-UNSB01_2:1984417 | 2 | 1984417 | 1985378 | 962  | 31 | 31  | AGAGCTGAGT |
| AGAGATGAGTTGTCGAGCGAGACCTCAGAAG                                                                                                                   |                       |   |         |         |      |    |     |            |
| UNSB01.fasta                                                                                                                                      | Cele-UNSB01_2:1991206 | 2 | 1991206 | 1991967 | 762  | 23 | 32  | AATTCCCGCC |
| AATTCCCGCCAAAAAATTGTAAAGAAAAATTTA                                                                                                                 |                       |   |         |         |      |    |     |            |
| UNSB01.fasta                                                                                                                                      | Cele-UNSB01_2:1992839 | 2 | 1992839 | 1994265 | 1427 | 46 | 31  | AGAGCTGAGT |
| AGAGATGAGTTGTCGAGCGAGACCTCAGAAG                                                                                                                   |                       |   |         |         |      |    |     |            |
| UNSB01.fasta                                                                                                                                      | Cele-UNSB01_2:2000093 | 2 | 2000093 | 2000918 | 826  | 25 | 32  | AATTCCCGCC |
| AATTCCCGCCAAAAAATTTTAAAGAAAAATTTA                                                                                                                 |                       |   |         |         |      |    |     |            |
| UNSB01.fasta                                                                                                                                      | Cele-UNSB01_2:2015956 | 2 | 2015956 | 2016256 | 301  | 25 | 12  | ATGTATATGT |
| ATGTATATGTAT                                                                                                                                      |                       |   |         |         |      |    |     |            |
| UNSB01.fasta                                                                                                                                      | Cele-UNSB01_2:2017071 | 2 | 2017071 | 2017146 | 76   | 5  | 15  | TCGTGGCGAG |
| TCGTTGCGAGACCCT                                                                                                                                   |                       |   |         |         |      |    |     |            |
| UNSB01.fasta                                                                                                                                      | Cele-UNSB01_2:2017169 | 2 | 2017169 | 2017519 | 351  | 10 | 32  | GGCGGGAATT |
| GGCGGGAATTCAAATTTTCTTTGAAAAATTTT                                                                                                                  |                       |   |         |         |      |    |     |            |
| UNSB01.fasta                                                                                                                                      | Cele-UNSB01_2:2023342 | 2 | 2023342 | 2024644 | 1303 | 42 | 31  | GACAACTCAG |
| GACAACTCATCTCTTCTCTGCTATCTCGCTA                                                                                                                   |                       |   |         |         |      |    |     |            |
| UNSB01.fasta                                                                                                                                      | Cele-UNSB01_2:2065528 | 2 | 2065528 | 2066342 | 815  | 5  | 162 | AGTTTTATGA |
| AGTTTTATGAAATAAAAAAGAATGACTCTATATGATTTTCCCATACTTTTGAATTTTGAAAAAATCAGCTTTTATATATTTTTATCCATTTTAAAAAATACTTCCGTACAACTATTATACTTTGTTTAGCATTTTCTGGTATTTT |                       |   |         |         |      |    |     |            |
| GACTATGCTGAAG                                                                                                                                     |                       |   |         |         |      |    |     |            |
| UNSB01.fasta                                                                                                                                      | Cele-UNSB01_2:2125481 | 2 | 2125481 | 2125594 | 114  | 5  | 22  | TGGTCAGTGC |
| TGGTCAGTGCAAAACATTTTAT                                                                                                                            |                       |   |         |         |      |    |     |            |
| UNSB01.fasta                                                                                                                                      | Cele-UNSB01_2:2168167 | 2 | 2168167 | 2168227 | 61   | 4  | 11  | ACCGCAACGC |
| ACCGCAACGCA                                                                                                                                       |                       |   |         |         |      |    |     |            |
| UNSB01.fasta                                                                                                                                      | Cele-UNSB01_2:2174137 | 2 | 2174137 | 2174267 | 131  | 5  | 26  | TCAAGGCGAA |
| TCAAGGCGAAACGGGAGGTGAATCGC                                                                                                                        |                       |   |         |         |      |    |     |            |
| UNSB01.fasta                                                                                                                                      | Cele-UNSB01_2:2187430 | 2 | 2187430 | 2189107 | 1678 | 38 | 43  | CGAGTTTGGC |
| CGAGTTTGGCCTACAGCAAATTTGGCAAATCGGCAAATTTGC                                                                                                        |                       |   |         |         |      |    |     |            |
| UNSB01.fasta                                                                                                                                      | Cele-UNSB01_2:2291158 | 2 | 2291158 | 2291371 | 214  | 8  | 21  | TGTGCCCTGG |
| TGTGCCCTGGAAAGCTGGTGG                                                                                                                             |                       |   |         |         |      |    |     |            |
| UNSB01.fasta                                                                                                                                      | Cele-UNSB01_2:2296694 | 2 | 2296694 | 2296754 | 61   | 4  | 10  | CAGCAGAGTG |
| CAGCAGAGTG                                                                                                                                        |                       |   |         |         |      |    |     |            |
| UNSB01.fasta                                                                                                                                      | Cele-UNSB01_2:2366031 | 2 | 2366031 | 2366422 | 392  | 13 | 11  | CTACAGTACC |
| CTACAGTACTC                                                                                                                                       |                       |   |         |         |      |    |     |            |
| UNSB01.fasta                                                                                                                                      | Cele-UNSB01_2:2379059 | 2 | 2379059 | 2380853 | 1795 | 9  | 163 | TGAATTTTGT |
| TGAATTTTGAATATATCAGCTTTTGGTTAAATCTGCATTTTAAAAATAAACTTCCGTACGAGCTAGCACCTTTTAAAGTATTTCTGGTACATTTGACTATGCTGAACAGTTTATAAAAAATAAAAAAGAATGACTTCATATAA   |                       |   |         |         |      |    |     |            |
| TTTTGAGGTACTTT                                                                                                                                    |                       |   |         |         |      |    |     |            |
| UNSB01.fasta                                                                                                                                      | Cele-UNSB01_2:2403604 | 2 | 2403604 | 2403679 | 76   | 5  | 15  | TCGTGGCGAG |
| TCGTTGCGAGACCCT                                                                                                                                   |                       |   |         |         |      |    |     |            |
| UNSB01.fasta                                                                                                                                      | Cele-UNSB01_2:2547654 | 2 | 2547654 | 2548528 | 875  | 24 | 35  | CCGGAAATTT |
| CCGGAAATTTTCATTTTCAACGATTTGCCGATTTG                                                                                                               |                       |   |         |         |      |    |     |            |
| UNSB01.fasta                                                                                                                                      | Cele-UNSB01_2:2568294 | 2 | 2568294 | 2568366 | 73   | 6  | 12  | TTAGGCTTAG |
| TTAGGCTTAGGC                                                                                                                                      |                       |   |         |         |      |    |     |            |
| UNSB01.fasta                                                                                                                                      | Cele-UNSB01_2:2602717 | 2 | 2602717 | 2603767 | 1051 | 24 | 31  | CTGAAATTCC |
| CTGAAATTTCCAATTTTCCACAGTAAAAATGC                                                                                                                  |                       |   |         |         |      |    |     |            |
| UNSB01.fasta                                                                                                                                      | Cele-UNSB01_2:2619434 | 2 | 2619434 | 2619682 | 249  | 8  | 31  | AGAGCTGAGT |
| AGAGATGAGTTGTCGAGCGAGACCTCAGAAG                                                                                                                   |                       |   |         |         |      |    |     |            |
| UNSB01.fasta                                                                                                                                      | Cele-UNSB01_2:2625510 | 2 | 2625510 | 2625733 | 224  | 7  | 32  | AATTCCCGCC |
| AATTCCCGCCAAAAAATTTTAAAGAAAAATTTA                                                                                                                 |                       |   |         |         |      |    |     |            |

|                                                                                                                                              |                       |   |         |         |      |     |     |              |
|----------------------------------------------------------------------------------------------------------------------------------------------|-----------------------|---|---------|---------|------|-----|-----|--------------|
| UNSB01.fasta                                                                                                                                 | Cele-UNSB01_2:2625547 | 2 | 2625547 | 2626102 | 556  | 7   | 32  | CCGCCAAAAA   |
| CCGCCAAAAATTTTCAGAGAAAAATTGAATTC                                                                                                             |                       |   |         |         |      |     |     |              |
| UNSB01.fasta                                                                                                                                 | Cele-UNSB01_2:2648748 | 2 | 2648748 | 2648862 | 115  | 6   | 19  | AAAATCGATA   |
| AAAATCAATAGTTTCATCG                                                                                                                          |                       |   |         |         |      |     |     |              |
| UNSB01.fasta                                                                                                                                 | Cele-UNSB01_2:2655599 | 2 | 2655599 | 2656120 | 522  | 10  | 14  | CTACAAACTA   |
| CTACAACCTATAAA                                                                                                                               |                       |   |         |         |      |     |     |              |
| UNSB01.fasta                                                                                                                                 | Cele-UNSB01_2:2657840 | 2 | 2657840 | 2658242 | 403  | 31  | 13  | TAAGCCTAAG   |
| TAAGCCTAAGCTC                                                                                                                                |                       |   |         |         |      |     |     |              |
| UNSB01.fasta                                                                                                                                 | Cele-UNSB01_2:2659185 | 2 | 2659185 | 2659251 | 67   | 5   | 12  | CCTAAGCCTA   |
| CTTAAGCCTATG                                                                                                                                 |                       |   |         |         |      |     |     |              |
| UNSB01.fasta                                                                                                                                 | Cele-UNSB01_2:2738496 | 2 | 2738496 | 2739194 | 699  | 7   | 95  | TTCTGGGCGCTG |
| TTCTGGGCGCTGCGGCCCTCAAACCTGGTTGTAGGCTTGAGCGAATAACAATCTGCTTGAATAGGATTAAAGTTGGCCACAGTTTCCAAGAGTG                                               |                       |   |         |         |      |     |     |              |
| UNSB01.fasta                                                                                                                                 | Cele-UNSB01_2:2756689 | 2 | 2756689 | 2756749 | 61   | 4   | 12  | GCCTAAGCCT   |
| GCCTAAGCCTAA                                                                                                                                 |                       |   |         |         |      |     |     |              |
| UNSB01.fasta                                                                                                                                 | Cele-UNSB01_2:2758878 | 2 | 2758878 | 2759540 | 663  | 24  | 22  | ACTACAGTAA   |
| ACTACAGTAATTCTACGTCGCT                                                                                                                       |                       |   |         |         |      |     |     |              |
| UNSB01.fasta                                                                                                                                 | Cele-UNSB01_2:2787652 | 2 | 2787652 | 2787836 | 185  | 11  | 16  | CACGTAGGCA   |
| CACGTAGGCAAGTAGG                                                                                                                             |                       |   |         |         |      |     |     |              |
| UNSB01.fasta                                                                                                                                 | Cele-UNSB01_2:2836927 | 2 | 2836927 | 2837967 | 1041 | 6   | 144 | TGGCCTAGAA   |
| TGGCCTAGAAATCCAAGTTTGCAAAGTTAGGCCATCAACTTCAAATGCCTATAACTTTGCGGAAATCTATATTTCAAATTAATTTTGAAGTTCTGTGATGCCATTAAACATGCGCATTTTTTGGCCTAGTTAACGTTTGA |                       |   |         |         |      |     |     |              |
| UNSB01.fasta                                                                                                                                 | Cele-UNSB01_2:2842834 | 2 | 2842834 | 2842918 | 85   | 6   | 12  | CCTAAGCCTA   |
| CCTAAGTCTAAG                                                                                                                                 |                       |   |         |         |      |     |     |              |
| UNSB01.fasta                                                                                                                                 | Cele-UNSB01_2:2923591 | 2 | 2923591 | 2929183 | 5593 | 231 | 21  | CCAAAAATTG   |
| CCAAAAATTGAGATTTTGTAGT                                                                                                                       |                       |   |         |         |      |     |     |              |
| UNSB01.fasta                                                                                                                                 | Cele-UNSB01_2:2979318 | 2 | 2979318 | 2980713 | 1396 | 9   | 155 | TCCCGCTGTG   |
| TCCCGCTGTGTTAAAGTTTGTGCGTGCTCAGTTCTGTACGGTAAATGTGTTAAAACTTCTGGAAGTTGAAATTCAGAAATTTGTCCAAATGGCGCAGTGGGAAATTCGATTTCTCTGACCCAAGAGGCCACGGG       |                       |   |         |         |      |     |     |              |
| TTCAAT                                                                                                                                       |                       |   |         |         |      |     |     |              |
| UNSB01.fasta                                                                                                                                 | Cele-UNSB01_2:2986853 | 2 | 2986853 | 2986937 | 85   | 7   | 12  | ATAGGCATAG   |
| ATAGGCATAGGC                                                                                                                                 |                       |   |         |         |      |     |     |              |
| UNSB01.fasta                                                                                                                                 | Cele-UNSB01_2:2995760 | 2 | 2995760 | 2997536 | 1777 | 53  | 14  | CTACCTGCCT   |
| CTACCTGCTTGTAC                                                                                                                               |                       |   |         |         |      |     |     |              |
| UNSB01.fasta                                                                                                                                 | Cele-UNSB01_2:3009682 | 2 | 3009682 | 3009822 | 141  | 5   | 28  | AATGTCGGCT   |
| AATGTCGGCTGCTTCTAGAAACTAAGCA                                                                                                                 |                       |   |         |         |      |     |     |              |
| UNSB01.fasta                                                                                                                                 | Cele-UNSB01_2:3063296 | 2 | 3063296 | 3063566 | 271  | 18  | 14  | TTAGGGCCTT   |
| TTAGGGCCTTGGGC                                                                                                                               |                       |   |         |         |      |     |     |              |
| UNSB01.fasta                                                                                                                                 | Cele-UNSB01_2:3065991 | 2 | 3065991 | 3066701 | 711  | 18  | 19  | GCCAAGGCAC   |
| GCCAAGGCACTGGAAATGC                                                                                                                          |                       |   |         |         |      |     |     |              |
| UNSB01.fasta                                                                                                                                 | Cele-UNSB01_2:3077809 | 2 | 3077809 | 3078033 | 225  | 15  | 14  | CTTATACCTT   |
| CTTATACCTTATAC                                                                                                                               |                       |   |         |         |      |     |     |              |
| UNSB01.fasta                                                                                                                                 | Cele-UNSB01_2:3099938 | 2 | 3099938 | 3100072 | 135  | 4   | 31  | ATCGATTTTT   |
| ATCGATTTTTTGGTTAAAAATCAATAAAAT                                                                                                               |                       |   |         |         |      |     |     |              |
| UNSB01.fasta                                                                                                                                 | Cele-UNSB01_2:3132033 | 2 | 3132033 | 3132195 | 163  | 6   | 27  | GCTGCTGGAG   |
| GCTGCTGGAGATCAACTTCAACAACT                                                                                                                   |                       |   |         |         |      |     |     |              |
| UNSB01.fasta                                                                                                                                 | Cele-UNSB01_2:3135702 | 2 | 3135702 | 3137322 | 1621 | 60  | 27  | TGCTGGAGGA   |
| TGCTGGAGGATCAACTTCAACAACTGC                                                                                                                  |                       |   |         |         |      |     |     |              |
| UNSB01.fasta                                                                                                                                 | Cele-UNSB01_2:3141695 | 2 | 3141695 | 3142468 | 774  | 16  | 43  | TTGCCGGAAT   |
| TTGCCGAGTTGAAAAATTTCTGTAAATCGGCAACCGGCAAC                                                                                                    |                       |   |         |         |      |     |     |              |
| UNSB01.fasta                                                                                                                                 | Cele-UNSB01_2:3154398 | 2 | 3154398 | 3154558 | 161  | 9   | 16  | TAGGCACGTA   |
| TAGGCACGTAAGCATG                                                                                                                             |                       |   |         |         |      |     |     |              |
| UNSB01.fasta                                                                                                                                 | Cele-UNSB01_2:3155808 | 2 | 3155808 | 3156160 | 353  | 18  | 16  | TACGTGCCTA   |
| TACGTGCCTACGTGCC                                                                                                                             |                       |   |         |         |      |     |     |              |
| UNSB01.fasta                                                                                                                                 | Cele-UNSB01_2:3166478 | 2 | 3166478 | 3166668 | 191  | 8   | 12  | GGCTTAGGCT   |
| GGCTTAGGCTTA                                                                                                                                 |                       |   |         |         |      |     |     |              |
| UNSB01.fasta                                                                                                                                 | Cele-UNSB01_2:3175289 | 2 | 3175289 | 3175339 | 51   | 4   | 10  | AACTTTCGAA   |
| AACTTTCGAA                                                                                                                                   |                       |   |         |         |      |     |     |              |
| UNSB01.fasta                                                                                                                                 | Cele-UNSB01_2:3182927 | 2 | 3182927 | 3183063 | 137  | 8   | 16  | AGGCACGTAG   |
| AGGCACGTAGGCATAT                                                                                                                             |                       |   |         |         |      |     |     |              |
| UNSB01.fasta                                                                                                                                 | Cele-UNSB01_2:3184073 | 2 | 3184073 | 3184138 | 66   | 4   | 14  | CCAAGGCCCA   |
| CCAAGGCCCAAGGC                                                                                                                               |                       |   |         |         |      |     |     |              |



|                                                                                |                       |   |         |         |       |     |    |            |
|--------------------------------------------------------------------------------|-----------------------|---|---------|---------|-------|-----|----|------------|
| UNSB01.fasta                                                                   | Cele-UNSB01_2:3220556 | 2 | 3220556 | 3221123 | 568   | 21  | 16 | GTAGGCACGT |
| GTAGGCACGTAGGCAC                                                               |                       |   |         |         |       |     |    |            |
| UNSB01.fasta                                                                   | Cele-UNSB01_2:3287465 | 2 | 3287465 | 3288008 | 544   | 19  | 20 | GTAAATCTAC |
| GTAAATCTACACTTGCTTCC                                                           |                       |   |         |         |       |     |    |            |
| UNSB01.fasta                                                                   | Cele-UNSB01_2:3312389 | 2 | 3312389 | 3313069 | 681   | 42  | 16 | CGTAGGCACG |
| CGTAGGCACGTGGGCG                                                               |                       |   |         |         |       |     |    |            |
| UNSB01.fasta                                                                   | Cele-UNSB01_2:3331473 | 2 | 3331473 | 3331608 | 136   | 5   | 27 | TTTACTCTCT |
| TTTACTCTCTGTGGCTTCCACTATAT                                                     |                       |   |         |         |       |     |    |            |
| UNSB01.fasta                                                                   | Cele-UNSB01_2:3341963 | 2 | 3341963 | 3342088 | 126   | 4   | 22 | ATTCTGCGCA |
| ATTCTGCGCACCCCCTGAGCGG                                                         |                       |   |         |         |       |     |    |            |
| UNSB01.fasta                                                                   | Cele-UNSB01_2:3406743 | 2 | 3406743 | 3406803 | 61    | 4   | 15 | GGTGAGACCC |
| GGTGAGACCCATCGC                                                                |                       |   |         |         |       |     |    |            |
| UNSB01.fasta                                                                   | Cele-UNSB01_2:3456136 | 2 | 3456136 | 3456276 | 141   | 4   | 28 | TGCCTCGCCT |
| TGCCTCGCCTACGTGCCTATTTCAAGCA                                                   |                       |   |         |         |       |     |    |            |
| UNSB01.fasta                                                                   | Cele-UNSB01_2:3460910 | 2 | 3460910 | 3461075 | 166   | 5   | 16 | GCACGTAGGC |
| GCACGTAAGCACGTAG                                                               |                       |   |         |         |       |     |    |            |
| UNSB01.fasta                                                                   | Cele-UNSB01_2:3500187 | 2 | 3500187 | 3500295 | 109   | 5   | 18 | GGCTTAGGCT |
| GGCTTAGGCTTAGGCTCA                                                             |                       |   |         |         |       |     |    |            |
| UNSB01.fasta                                                                   | Cele-UNSB01_2:3515774 | 2 | 3515774 | 3515844 | 71    | 4   | 12 | ATACATATAC |
| ATACATATACAT                                                                   |                       |   |         |         |       |     |    |            |
| UNSB01.fasta                                                                   | Cele-UNSB01_2:3535061 | 2 | 3535061 | 3535729 | 669   | 54  | 12 | TAGGTATAGG |
| TAGGTAAAGGCA                                                                   |                       |   |         |         |       |     |    |            |
| UNSB01.fasta                                                                   | Cele-UNSB01_2:3539245 | 2 | 3539245 | 3539476 | 232   | 5   | 39 | AATTTCCCGC |
| AATTTCCCGCCAAAATTGAATTTTAAAGAAAATTTA                                           |                       |   |         |         |       |     |    |            |
| UNSB01.fasta                                                                   | Cele-UNSB01_2:3540761 | 2 | 3540761 | 3541492 | 732   | 18  | 31 | GGTTACTGTA |
| GGTTACTGTAACTCAAGCCTGAGATTCTTCG                                                |                       |   |         |         |       |     |    |            |
| UNSB01.fasta                                                                   | Cele-UNSB01_2:3557247 | 2 | 3557247 | 3557399 | 153   | 9   | 16 | GTAGGCACGT |
| GTAGGTACGTAGGCAC                                                               |                       |   |         |         |       |     |    |            |
| UNSB01.fasta                                                                   | Cele-UNSB01_2:3617397 | 2 | 3617397 | 3617684 | 288   | 6   | 42 | TTTGAAAACC |
| TTTGAAAACCGCAATTGCCGAAATTGTCGAGTGCCGAAAAT                                      |                       |   |         |         |       |     |    |            |
| UNSB01.fasta                                                                   | Cele-UNSB01_2:3687013 | 2 | 3687013 | 3687103 | 91    | 5   | 20 | CTATCGCCTG |
| CTATCGCCTGCTATTGCCTA                                                           |                       |   |         |         |       |     |    |            |
| UNSB01.fasta                                                                   | Cele-UNSB01_2:3736361 | 2 | 3736361 | 3736609 | 249   | 8   | 31 | GCTGATTGGT |
| GCTGATTGGTCGGAATAACTCTCCAGAATC                                                 |                       |   |         |         |       |     |    |            |
| UNSB01.fasta                                                                   | Cele-UNSB01_2:3799242 | 2 | 3799242 | 3799338 | 97    | 4   | 24 | TGCATCTGCC |
| TGCATCTGCCGCTGGAGTTGTTGC                                                       |                       |   |         |         |       |     |    |            |
| UNSB01.fasta                                                                   | Cele-UNSB01_2:3989433 | 2 | 3989433 | 3989722 | 290   | 6   | 45 | AAGGATCAGA |
| AAGGATCAGATCATTAGGAGGTACCCCTTCTGATCCTTCGGAGCTG                                 |                       |   |         |         |       |     |    |            |
| UNSB01.fasta                                                                   | Cele-UNSB01_2:3993365 | 2 | 3993365 | 3994945 | 1581  | 20  | 79 | GTGAATCTCC |
| GTGAATCTCCTCTCCACCTAATGATTCTGACAGAATACCGGCAGTATTCTGGGGTCTCATTAGCTTTTAGTTTCTTCT |                       |   |         |         |       |     |    |            |
| UNSB01.fasta                                                                   | Cele-UNSB01_2:4043072 | 2 | 4043072 | 4059727 | 16656 | 833 | 20 | ATTGTTACAC |
| ATTGTTACACGAAAAAATAG                                                           |                       |   |         |         |       |     |    |            |
| UNSB01.fasta                                                                   | Cele-UNSB01_2:4095823 | 2 | 4095823 | 4096643 | 821   | 4   | 16 | TGCCTACGTG |
| TGCCTACGTGCCTACG                                                               |                       |   |         |         |       |     |    |            |
| UNSB01.fasta                                                                   | Cele-UNSB01_2:4119390 | 2 | 4119390 | 4119751 | 362   | 4   | 21 | CTACGTAAGA |
| CTACGTAAGAGTAGCGCAGGA                                                          |                       |   |         |         |       |     |    |            |
| UNSB01.fasta                                                                   | Cele-UNSB01_2:4146856 | 2 | 4146856 | 4147072 | 217   | 14  | 12 | CTTAGGCTTA |
| CTTAGGTTTAGA                                                                   |                       |   |         |         |       |     |    |            |
| UNSB01.fasta                                                                   | Cele-UNSB01_2:4159337 | 2 | 4159337 | 4159593 | 257   | 13  | 11 | GTACTGTAGG |
| GTACTGTAGGA                                                                    |                       |   |         |         |       |     |    |            |
| UNSB01.fasta                                                                   | Cele-UNSB01_2:4203805 | 2 | 4203805 | 4204480 | 676   | 4   | 11 | TGCCTGCCTA |
| TGCCTGCCTAC                                                                    |                       |   |         |         |       |     |    |            |
| UNSB01.fasta                                                                   | Cele-UNSB01_2:4205915 | 2 | 4205915 | 4205959 | 45    | 4   | 11 | GGCAGGCAGT |
| GGCAGGCAGTA                                                                    |                       |   |         |         |       |     |    |            |
| UNSB01.fasta                                                                   | Cele-UNSB01_2:4270872 | 2 | 4270872 | 4271040 | 169   | 5   | 24 | GTGAGGTACG |
| GTGAGGTACGAGATGAGGTACAAG                                                       |                       |   |         |         |       |     |    |            |
| UNSB01.fasta                                                                   | Cele-UNSB01_2:4272676 | 2 | 4272676 | 4272936 | 261   | 25  | 10 | GCGTTAGCAG |
| GCGTTAGCAG                                                                     |                       |   |         |         |       |     |    |            |

|                                                                                                                                                       |                       |   |         |         |       |     |     |             |
|-------------------------------------------------------------------------------------------------------------------------------------------------------|-----------------------|---|---------|---------|-------|-----|-----|-------------|
| UNSB01.fasta                                                                                                                                          | Cele-UNSB01_2:4275898 | 2 | 4275898 | 4276001 | 104   | 5   | 18  | TGCAAGACTA  |
| TGCAAGACTAATAGAGAC                                                                                                                                    |                       |   |         |         |       |     |     |             |
| UNSB01.fasta                                                                                                                                          | Cele-UNSB01_2:4325046 | 2 | 4325046 | 4325721 | 676   | 27  | 25  | GAGAGTAAAA  |
| GAGAGTAAAAATACGGTGAAGCCA                                                                                                                              |                       |   |         |         |       |     |     |             |
| UNSB01.fasta                                                                                                                                          | Cele-UNSB01_2:4325748 | 2 | 4325748 | 4326453 | 706   | 45  | 15  | CTCACCACGA  |
| CTCACCACGAAGGGT                                                                                                                                       |                       |   |         |         |       |     |     |             |
| UNSB01.fasta                                                                                                                                          | Cele-UNSB01_2:4361834 | 2 | 4361834 | 4362159 | 326   | 8   | 35  | TTCCGGCAAA  |
| TTCCGGCAAAACGGCAAATTGTCAAATTGAAAAAT                                                                                                                   |                       |   |         |         |       |     |     |             |
| UNSB01.fasta                                                                                                                                          | Cele-UNSB01_2:4377229 | 2 | 4377229 | 4377482 | 254   | 23  | 11  | CAGTTGTTCAC |
| CAGTTATCACCC                                                                                                                                          |                       |   |         |         |       |     |     |             |
| UNSB01.fasta                                                                                                                                          | Cele-UNSB01_2:4380400 | 2 | 4380400 | 4380472 | 73    | 4   | 12  | AGCCTAAGCC  |
| AGCCTTAGCCTA                                                                                                                                          |                       |   |         |         |       |     |     |             |
| UNSB01.fasta                                                                                                                                          | Cele-UNSB01_2:4433247 | 2 | 4433247 | 4433329 | 83    | 4   | 12  | TAAGCCTAAG  |
| TAAGCCTAAGAC                                                                                                                                          |                       |   |         |         |       |     |     |             |
| UNSB01.fasta                                                                                                                                          | Cele-UNSB01_2:4510577 | 2 | 4510577 | 4510967 | 391   | 36  | 11  | TGCACATTTT  |
| TGCACATTTT                                                                                                                                            |                       |   |         |         |       |     |     |             |
| UNSB01.fasta                                                                                                                                          | Cele-UNSB01_2:4622617 | 2 | 4622617 | 4623337 | 721   | 18  | 40  | TCCAGAACCT  |
| TCCAGAACCTTCTGGAAAATCCGAGAAAATTTCTGGAAATGT                                                                                                            |                       |   |         |         |       |     |     |             |
| UNSB01.fasta                                                                                                                                          | Cele-UNSB01_2:4623470 | 2 | 4623470 | 4624110 | 641   | 20  | 32  | CGGGAATTCA  |
| CGGGAATTCAAATTTCTGTGAAAAATTTTGG                                                                                                                       |                       |   |         |         |       |     |     |             |
| UNSB01.fasta                                                                                                                                          | Cele-UNSB01_2:4637434 | 2 | 4637434 | 4637644 | 211   | 5   | 35  | TTTGCCGGAA  |
| TTTGCCAGAAAATTTTCATTTTCGGCAAATTACCGA                                                                                                                  |                       |   |         |         |       |     |     |             |
| UNSB01.fasta                                                                                                                                          | Cele-UNSB01_2:4751417 | 2 | 4751417 | 4751507 | 91    | 6   | 15  | GAGACCCATC  |
| GAGACCCAGCGTGGT                                                                                                                                       |                       |   |         |         |       |     |     |             |
| UNSB01.fasta                                                                                                                                          | Cele-UNSB01_2:4751413 | 2 | 4751413 | 4751956 | 544   | 21  | 15  | TGGTGAGACC  |
| TGGCGAGACCCAGCG                                                                                                                                       |                       |   |         |         |       |     |     |             |
| UNSB01.fasta                                                                                                                                          | Cele-UNSB01_2:5140446 | 2 | 5140446 | 5146375 | 5930  | 77  | 76  | CAATAGAAAA  |
| CAATAGAAAAGATGGAAGACTACAGAAAACTATTGAGAGACCCCGAAATACTGGCTGTATTTTGAAAGGTCATCT                                                                           |                       |   |         |         |       |     |     |             |
| UNSB01.fasta                                                                                                                                          | Cele-UNSB01_2:5166221 | 2 | 5166221 | 5171016 | 4796  | 184 | 26  | TAGACCATTA  |
| TAGACCATTAGATGAATTCCCAAAGT                                                                                                                            |                       |   |         |         |       |     |     |             |
| UNSB01.fasta                                                                                                                                          | Cele-UNSB01_2:5217429 | 2 | 5217429 | 5217681 | 253   | 9   | 25  | AGAGTAAAAAT |
| AGAGTAAAAATAATTGGTGAAGCCAG                                                                                                                            |                       |   |         |         |       |     |     |             |
| UNSB01.fasta                                                                                                                                          | Cele-UNSB01_2:5217526 | 2 | 5217526 | 5241162 | 23637 | 927 | 25  | AGCCAGAGAG  |
| AGCCACAGAGTAAAAATAATTGGGAA                                                                                                                            |                       |   |         |         |       |     |     |             |
| UNSB01.fasta                                                                                                                                          | Cele-UNSB01_2:5722242 | 2 | 5722242 | 5722548 | 307   | 9   | 34  | GGAATTGAAA  |
| GGAATTGAAATTTCCAGCAAATCGGCAAATTGCC                                                                                                                    |                       |   |         |         |       |     |     |             |
| UNSB01.fasta                                                                                                                                          | Cele-UNSB01_2:5970897 | 2 | 5970897 | 5971730 | 834   | 4   | 203 | GTTCAAGCAG  |
| GTTCAAGCAGAACAAGTAGATCACATTTTGAGATTGAATAGAAATAAACGAGTTATATGCAAAATTAGTAGACTTTCCAACTTTGAAAAATTAATATCTGGCTTCAAATACTTTTCTGAAAATCCCCGTAGCCATTTTGTTCGAAATT  |                       |   |         |         |       |     |     |             |
| TTGTGCTCTTTTCAGAAATTTAGAAACGGCATTTCCAACATTTCCATATTCGCCAG                                                                                              |                       |   |         |         |       |     |     |             |
| UNSB01.fasta                                                                                                                                          | Cele-UNSB01_2:6168224 | 2 | 6168224 | 6172025 | 3802  | 21  | 181 | TTTTTAAC TT |
| TTTTTAAC TT TTAATCCACTAAAAATTTGAATGGTACAGAACATGAAAATTTGAATTTTAAAACTGAATGTGGTTTCGAATATTTATGGATTCTTTATTCTAAAAC TGACTCTGAAATATTTTGCATCCATTTGACTATTAATTGC |                       |   |         |         |       |     |     |             |
| CATATTATACCGAACACTACTAAC TTTACTGG                                                                                                                     |                       |   |         |         |       |     |     |             |
| UNSB01.fasta                                                                                                                                          | Cele-UNSB01_2:6176621 | 2 | 6176621 | 6177425 | 805   | 18  | 45  | CTGAAGGATC  |
| CTGAAGGATCAGACCATCAGGAGGTACCCTTACGATCCTTCTTAT                                                                                                         |                       |   |         |         |       |     |     |             |
| UNSB01.fasta                                                                                                                                          | Cele-UNSB01_2:6280573 | 2 | 6280573 | 6282049 | 1477  | 96  | 14  | CTATACGCTA  |
| CTATACGCTATACG                                                                                                                                        |                       |   |         |         |       |     |     |             |
| UNSB01.fasta                                                                                                                                          | Cele-UNSB01_2:6282823 | 2 | 6282823 | 6283646 | 824   | 34  | 10  | TCCCGATCCA  |
| TCCCGATCCA                                                                                                                                            |                       |   |         |         |       |     |     |             |
| UNSB01.fasta                                                                                                                                          | Cele-UNSB01_2:6392491 | 2 | 6392491 | 6392539 | 49    | 4   | 12  | CCACTGACCA  |
| CCACTGACCATC                                                                                                                                          |                       |   |         |         |       |     |     |             |
| UNSB01.fasta                                                                                                                                          | Cele-UNSB01_2:6392670 | 2 | 6392670 | 6395650 | 2981  | 44  | 68  | AATAAAAAATT |
| AATAAAAAATTTAAAAATTTTATTAGTGTCTCTATTTTATCAAGAAAAATACATTTTCAAATAGAGACG                                                                                 |                       |   |         |         |       |     |     |             |
| UNSB01.fasta                                                                                                                                          | Cele-UNSB01_2:6532865 | 2 | 6532865 | 6533025 | 161   | 5   | 32  | AAAAATTTTC  |
| AAAAATTTTTCACAGAAAATTTGAATTTCCCGCC                                                                                                                    |                       |   |         |         |       |     |     |             |
| UNSB01.fasta                                                                                                                                          | Cele-UNSB01_2:6532865 | 2 | 6532865 | 6533618 | 754   | 6   | 32  | AAAAATTTTC  |
| AAAAATTTTTCACAGAAAATTTGAATTTCCCGCC                                                                                                                    |                       |   |         |         |       |     |     |             |
| UNSB01.fasta                                                                                                                                          | Cele-UNSB01_2:7497139 | 2 | 7497139 | 7497311 | 173   | 4   | 41  | AAACCGGGAA  |
| AAACCGGGAAAAACGGGAATTTCCCGTTCCCGTGAAAAATTTTA                                                                                                          |                       |   |         |         |       |     |     |             |

|                                                                                                                                      |                                                    |   |          |          |       |     |     |             |
|--------------------------------------------------------------------------------------------------------------------------------------|----------------------------------------------------|---|----------|----------|-------|-----|-----|-------------|
| UNSB01.fasta                                                                                                                         | Cele-UNSB01_2:7497138                              | 2 | 7497138  | 7497671  | 534   | 10  | 41  | AAAAACGGGA  |
| AAAAACGGGAAAAACGGGAATTC                                                                                                              | CCCGTTCCCGTGAAAAATTTT                              |   |          |          |       |     |     |             |
| UNSB01.fasta                                                                                                                         | Cele-UNSB01_2:7564245                              | 2 | 7564245  | 7565607  | 1363  | 34  | 14  | GAAGGATCGG  |
| GAAGGATCGGGCCG                                                                                                                       |                                                    |   |          |          |       |     |     |             |
| UNSB01.fasta                                                                                                                         | Cele-UNSB01_2:7566750                              | 2 | 7566750  | 7567567  | 818   | 42  | 16  | CGGAAAAATT  |
| CGGAAAACTTTCGCTG                                                                                                                     |                                                    |   |          |          |       |     |     |             |
| UNSB01.fasta                                                                                                                         | Cele-UNSB01_2:7568262                              | 2 | 7568262  | 7569624  | 1363  | 34  | 14  | CCGATCCTTC  |
| CCGATCCTTCCGAC                                                                                                                       |                                                    |   |          |          |       |     |     |             |
| UNSB01.fasta                                                                                                                         | Cele-UNSB01_2:7569779                              | 2 | 7569779  | 7570282  | 504   | 27  | 10  | TCCATCCCGA  |
| TCCATCCAC                                                                                                                            |                                                    |   |          |          |       |     |     |             |
| UNSB01.fasta                                                                                                                         | Cele-UNSB01_2:7594307                              | 2 | 7594307  | 7594367  | 61    | 4   | 15  | GTAGATCTTG  |
| GTAGATCTTGAAAAAT                                                                                                                     |                                                    |   |          |          |       |     |     |             |
| UNSB01.fasta                                                                                                                         | Cele-UNSB01_2:8013550                              | 2 | 8013550  | 8013642  | 93    | 6   | 15  | CGAAAAGGGG  |
| CGAAAAGGGGATCTG                                                                                                                      |                                                    |   |          |          |       |     |     |             |
| UNSB01.fasta                                                                                                                         | Cele-UNSB01_2:8013818                              | 2 | 8013818  | 8013910  | 93    | 6   | 15  | CCCCTTTTCG  |
| CCCCTTTTCGTATCT                                                                                                                      |                                                    |   |          |          |       |     |     |             |
| UNSB01.fasta                                                                                                                         | Cele-UNSB01_2:8406477                              | 2 | 8406477  | 8418390  | 11914 | 144 | 79  | TGACAGAATA  |
| TGACAGAATACCGACAGTATTTT                                                                                                              | GGGTCATAGTTTCCTTTTCTTGAATCTCCACTCTTCTTAATGAGTCC    |   |          |          |       |     |     |             |
| UNSB01.fasta                                                                                                                         | Cele-UNSB01_2:8585644                              | 2 | 8585644  | 8586044  | 401   | 10  | 40  | AAAGTTCTGG  |
| AAAGTTCTGGAACATTCCAAAAATTT                                                                                                           | CCCAATTTTCTAG                                      |   |          |          |       |     |     |             |
| UNSB01.fasta                                                                                                                         | Cele-UNSB01_2:8586336                              | 2 | 8586336  | 8586411  | 76    | 4   | 15  | GGGTCTCACC  |
| GGGTCTCACCACGAC                                                                                                                      |                                                    |   |          |          |       |     |     |             |
| UNSB01.fasta                                                                                                                         | Cele-UNSB01_2:9101090                              | 2 | 9101090  | 9103530  | 2441  | 29  | 86  | AGCCAGTATT  |
| AGCCAGTATTTCGGGGTCTGGCAATAGCTTCTCTTAACTTCGAACCTCTTCCATCTTTT                                                                          | CCCTATTGCCACGACCTTTCAAAAATAC                       |   |          |          |       |     |     |             |
| UNSB01.fasta                                                                                                                         | Cele-UNSB01_2:9328143                              | 2 | 9328143  | 9328548  | 406   | 27  | 15  | TGGTGAGACC  |
| TGGTGAGACCTTCG                                                                                                                       |                                                    |   |          |          |       |     |     |             |
| UNSB01.fasta                                                                                                                         | Cele-UNSB01_2:9328575                              | 2 | 9328575  | 9329101  | 527   | 15  | 35  | ATTCAAATTT  |
| ATTCAAATTTTCAGTGAAAAAATTTT                                                                                                           | TGGCGGGAA                                          |   |          |          |       |     |     |             |
| UNSB01.fasta                                                                                                                         | Cele-UNSB01_2:9328566                              | 2 | 9328566  | 9329542  | 977   | 16  | 35  | TGGCGGGAAA  |
| TGGAGGGAAATTCAAATTTTCAGTGAAAAAATTT                                                                                                   |                                                    |   |          |          |       |     |     |             |
| UNSB01.fasta                                                                                                                         | Cele-UNSB01_2:9530992                              | 2 | 9530992  | 9537371  | 6380  | 247 | 25  | CTCTCTGGCT  |
| CTCTCCGGCTTCACAGTATATTTTA                                                                                                            |                                                    |   |          |          |       |     |     |             |
| UNSB01.fasta                                                                                                                         | Cele-UNSB01_2:9763711                              | 2 | 9763711  | 9764616  | 906   | 23  | 40  | TTCCAGAATT  |
| TTCCAGAATTTTCTCGATTTTCTAGAAAGTTCTGGAACA                                                                                              |                                                    |   |          |          |       |     |     |             |
| UNSB01.fasta                                                                                                                         | Cele-UNSB01_2:9764656                              | 2 | 9764656  | 9765286  | 631   | 18  | 35  | CCAAAAATATT |
| CCAAAAATATTTTTTCAGAAAAATTAAATTTCCCT                                                                                                  |                                                    |   |          |          |       |     |     |             |
| UNSB01.fasta                                                                                                                         | Cele-UNSB01_2:9765369                              | 2 | 9765369  | 9765639  | 271   | 17  | 15  | CCACGATGGG  |
| CCACGAAGGGTATCA                                                                                                                      |                                                    |   |          |          |       |     |     |             |
| UNSB01.fasta                                                                                                                         | Cele-UNSB01_2:9765885                              | 2 | 9765885  | 9766019  | 135   | 5   | 11  | GTA         |
| GTACTCCTACA                                                                                                                          |                                                    |   |          |          |       |     |     |             |
| UNSB01.fasta                                                                                                                         | Cele-UNSB01_2:9825153                              | 2 | 9825153  | 9825520  | 368   | 4   | 42  | CAGCCGACAG  |
| CAGCCGACAGCCGAAAACTTGGAAATTTTCGGCTGGTAGCAC                                                                                           |                                                    |   |          |          |       |     |     |             |
| UNSB01.fasta                                                                                                                         | Cele-UNSB01_2:10367690                             | 2 | 10367690 | 10367782 | 93    | 6   | 15  | TCCCCTTTTC  |
| TCCCCTTTTCGTATC                                                                                                                      |                                                    |   |          |          |       |     |     |             |
| UNSB01.fasta                                                                                                                         | Cele-UNSB01_2:10468271                             | 2 | 10468271 | 10470517 | 2247  | 10  | 225 | TTTTCGAAAT  |
| TTTTCGAAATGTCTTTCAGAACTTTGTAGTAAATTTTAAGCTCTTTCAGATTATATTAACAATATTCCAGTAGGTACAAGAAGCTTCAAGTAGTTACAGAAATAGTACATTTTCAGCCCTACCTTTTAGTGC | TATTTTATTATTAAT                                    |   |          |          |       |     |     |             |
| GAAACTACTATGTATAGGCAAAATAGATGGATTTTACAACCTTTGAAATTCATAAACCTCTTCAAGTAACTG                                                             |                                                    |   |          |          |       |     |     |             |
| UNSB01.fasta                                                                                                                         | Cele-UNSB01_2:10597740                             | 2 | 10597740 | 10597833 | 94    | 5   | 18  | TAAATAAGTG  |
| TAAATAAGTGGCTATAAG                                                                                                                   |                                                    |   |          |          |       |     |     |             |
| UNSB01.fasta                                                                                                                         | Cele-UNSB01_2:10844890                             | 2 | 10844890 | 10845587 | 698   | 8   | 35  | TTTCTGGCAA  |
| TTTCTGGCAAACCGCAATTTGCCGAAAAATTA                                                                                                     | AAAA                                               |   |          |          |       |     |     |             |
| UNSB01.fasta                                                                                                                         | Cele-UNSB01_2:10964073                             | 2 | 10964073 | 10965096 | 1024  | 24  | 11  | GTA         |
| GTA                                                                                                                                  |                                                    |   |          |          |       |     |     |             |
| UNSB01.fasta                                                                                                                         | Cele-UNSB01_2:11255667                             | 2 | 11255667 | 11256407 | 741   | 61  | 12  | AAAAATAAAA  |
| AAAAATAAAAAAT                                                                                                                        |                                                    |   |          |          |       |     |     |             |
| UNSB01.fasta                                                                                                                         | Cele-UNSB01_2:11255666                             | 2 | 11255666 | 11256503 | 838   | 64  | 12  | TAAAAATAAA  |
| TAAAAATAAAAA                                                                                                                         |                                                    |   |          |          |       |     |     |             |
| UNSB01.fasta                                                                                                                         | Cele-UNSB01_2:11256637                             | 2 | 11256637 | 11258512 | 1876  | 15  | 124 | AATTTTCAAA  |
| AATTTTCAAAAGTTTGAAATCTATTAATTTTACATATAAATTGTGGTCTACAAGGTATGACTGAAAAATTCAC                                                            | TTTTTCTGCTTGAACCTGGCGGTTTCAAAATTTTTTGAAATCTGTTTTTA |   |          |          |       |     |     |             |

|                                                                   |                        |   |          |          |      |    |    |             |
|-------------------------------------------------------------------|------------------------|---|----------|----------|------|----|----|-------------|
| UNSB01.fasta                                                      | Cele-UNSB01_2:11366885 | 2 | 11366885 | 11367108 | 224  | 5  | 44 | AAGGATCAGA  |
| AAGGATCAGATCATCAGGCAGAGCCTCATGCTCTTTTGGAGCTG                      |                        |   |          |          |      |    |    |             |
| UNSB01.fasta                                                      | Cele-UNSB01_2:11443617 | 2 | 11443617 | 11443668 | 52   | 4  | 12 | ACTATAACTA  |
| ACTACAAC TACA                                                     |                        |   |          |          |      |    |    |             |
| UNSB01.fasta                                                      | Cele-UNSB01_2:11502184 | 2 | 11502184 | 11502280 | 97   | 5  | 24 | GCTTAGGCTT  |
| GCTTAGGCTTAGGCTTGGGCTCAA                                          |                        |   |          |          |      |    |    |             |
| UNSB01.fasta                                                      | Cele-UNSB01_2:11560093 | 2 | 11560093 | 11560292 | 200  | 9  | 20 | AAAAAATAGA  |
| AAAAAATAGATTGGCATACG                                              |                        |   |          |          |      |    |    |             |
| UNSB01.fasta                                                      | Cele-UNSB01_2:11664501 | 2 | 11664501 | 11665796 | 1296 | 29 | 45 | TCTGATCCTT  |
| TCTGATCCTTCAGATAAGAAGAATCGTAAGGGTACCTCCTGATGG                     |                        |   |          |          |      |    |    |             |
| UNSB01.fasta                                                      | Cele-UNSB01_2:11667411 | 2 | 11667411 | 11669597 | 2187 | 49 | 45 | GAAGGATCAG  |
| GAAGTATCAGACCATCAGGAGGTACCCTTACGATCCTTCTTATCT                     |                        |   |          |          |      |    |    |             |
| UNSB01.fasta                                                      | Cele-UNSB01_2:11673801 | 2 | 11673801 | 11673893 | 93   | 6  | 15 | CGAAAAGGGG  |
| CGAAAAGGGGATCTG                                                   |                        |   |          |          |      |    |    |             |
| UNSB01.fasta                                                      | Cele-UNSB01_2:11674068 | 2 | 11674068 | 11674143 | 76   | 5  | 15 | TCCCTTTTTC  |
| TCCCTTTTTCGTATC                                                   |                        |   |          |          |      |    |    |             |
| UNSB01.fasta                                                      | Cele-UNSB01_2:11799205 | 2 | 11799205 | 11799469 | 265  | 8  | 33 | AATTGAAAAT  |
| AATTGAAAATCCGGCAAATGGGCAAATTGCCGT                                 |                        |   |          |          |      |    |    |             |
| UNSB01.fasta                                                      | Cele-UNSB01_2:11872286 | 2 | 11872286 | 11872364 | 79   | 6  | 12 | CTTAGGCTTA  |
| CTTAGGCTTAGG                                                      |                        |   |          |          |      |    |    |             |
| UNSB01.fasta                                                      | Cele-UNSB01_2:12045935 | 2 | 12045935 | 12046042 | 108  | 8  | 12 | AGGCTTAGGC  |
| AGGCTTAAGCTT                                                      |                        |   |          |          |      |    |    |             |
| UNSB01.fasta                                                      | Cele-UNSB01_2:12047204 | 2 | 12047204 | 12047947 | 744  | 32 | 20 | TAAATCTACA  |
| TAAATCTACACAGGGTGGTG                                              |                        |   |          |          |      |    |    |             |
| UNSB01.fasta                                                      | Cele-UNSB01_2:12070558 | 2 | 12070558 | 12070690 | 133  | 10 | 12 | AAGCCTAAGC  |
| AAGCCTAACCAT                                                      |                        |   |          |          |      |    |    |             |
| UNSB01.fasta                                                      | Cele-UNSB01_2:12072605 | 2 | 12072605 | 12072779 | 175  | 10 | 12 | AGGCTTAGGC  |
| AGGCTTAGACTT                                                      |                        |   |          |          |      |    |    |             |
| UNSB01.fasta                                                      | Cele-UNSB01_2:12142720 | 2 | 12142720 | 12142795 | 76   | 4  | 15 | AAAACAAGAT  |
| AAAAGAAGATCTACA                                                   |                        |   |          |          |      |    |    |             |
| UNSB01.fasta                                                      | Cele-UNSB01_2:12311843 | 2 | 12311843 | 12313532 | 1690 | 56 | 30 | CAAAC TACAG |
| CAAAC TACAGTAGCACTG TAGTACCATAAC                                  |                        |   |          |          |      |    |    |             |
| UNSB01.fasta                                                      | Cele-UNSB01_2:12381269 | 2 | 12381269 | 12381383 | 115  | 7  | 12 | TTAGTCTTAG  |
| TTAGTCTTAGGC                                                      |                        |   |          |          |      |    |    |             |
| UNSB01.fasta                                                      | Cele-UNSB01_2:12388949 | 2 | 12388949 | 12389045 | 97   | 7  | 12 | CCTAAGCCTA  |
| CCTAACCCTAAG                                                      |                        |   |          |          |      |    |    |             |
| UNSB01.fasta                                                      | Cele-UNSB01_2:12463695 | 2 | 12463695 | 12463773 | 79   | 5  | 12 | TTAGGCTTAG  |
| TTAGGCTCAGGC                                                      |                        |   |          |          |      |    |    |             |
| UNSB01.fasta                                                      | Cele-UNSB01_2:12477614 | 2 | 12477614 | 12477893 | 280  | 4  | 69 | AGGTAGGCCT  |
| AGGTAGGCCTGTAGGCATTGACTGGCAGAAAAGTGTAGGCAGGCAGGTAAAAAGATACATGCGGC |                        |   |          |          |      |    |    |             |
| UNSB01.fasta                                                      | Cele-UNSB01_2:12492091 | 2 | 12492091 | 12492147 | 57   | 5  | 11 | CTACAGTACC  |
| CTACAGTACCC                                                       |                        |   |          |          |      |    |    |             |
| UNSB01.fasta                                                      | Cele-UNSB01_2:12494810 | 2 | 12494810 | 12494978 | 169  | 14 | 12 | CCTATACCTA  |
| CCTATACCTATA                                                      |                        |   |          |          |      |    |    |             |
| UNSB01.fasta                                                      | Cele-UNSB01_2:12522288 | 2 | 12522288 | 12522472 | 185  | 13 | 12 | AGCCTAAGCC  |
| AGCCTAAGCCTA                                                      |                        |   |          |          |      |    |    |             |
| UNSB01.fasta                                                      | Cele-UNSB01_2:12544046 | 2 | 12544046 | 12545336 | 1291 | 30 | 43 | TTTCCGGCAA  |
| TTTCCGGCAAATCGGCAAACCGGCATATTGCCAAAAATAAAAA                       |                        |   |          |          |      |    |    |             |
| UNSB01.fasta                                                      | Cele-UNSB01_2:12597085 | 2 | 12597085 | 12597273 | 189  | 6  | 31 | GACATCTCGC  |
| GACATCTCGCAGGACAATATAAAAAGCGACC                                   |                        |   |          |          |      |    |    |             |
| UNSB01.fasta                                                      | Cele-UNSB01_2:12608492 | 2 | 12608492 | 12608559 | 68   | 5  | 12 | GGCTTAGGCT  |
| GGCTTAGGCTTA                                                      |                        |   |          |          |      |    |    |             |
| UNSB01.fasta                                                      | Cele-UNSB01_2:12716681 | 2 | 12716681 | 12716766 | 86   | 5  | 17 | ACTTGGTACA  |
| ACTTGGTACATAGACCA                                                 |                        |   |          |          |      |    |    |             |
| UNSB01.fasta                                                      | Cele-UNSB01_2:12718309 | 2 | 12718309 | 12718687 | 379  | 8  | 42 | TTGCCGAACC  |
| TTGCCGAACCGTAAAAATTTGGCAACCTGGAAGTGCCAAAG                         |                        |   |          |          |      |    |    |             |
| UNSB01.fasta                                                      | Cele-UNSB01_2:12791702 | 2 | 12791702 | 12792113 | 412  | 11 | 37 | ATTTTGCGCG  |
| ATTTTGCGCGGAATTCAAATTTTAAATTTTGGAAAAAT                            |                        |   |          |          |      |    |    |             |

|                                                                                                                                                   |                        |   |          |          |       |     |     |             |
|---------------------------------------------------------------------------------------------------------------------------------------------------|------------------------|---|----------|----------|-------|-----|-----|-------------|
| UNSB01.fasta                                                                                                                                      | Cele-UNSB01_2:12792220 | 2 | 12792220 | 12794215 | 1996  | 131 | 15  | TCGTGGTGAG  |
| TCGTGGTGAGACCCA                                                                                                                                   |                        |   |          |          |       |     |     |             |
| UNSB01.fasta                                                                                                                                      | Cele-UNSB01_2:12843731 | 2 | 12843731 | 12843956 | 226   | 7   | 11  | CTACAGTACC  |
| CTACAGTACTC                                                                                                                                       |                        |   |          |          |       |     |     |             |
| UNSB01.fasta                                                                                                                                      | Cele-UNSB01_2:12862834 | 2 | 12862834 | 12863019 | 186   | 5   | 43  | TATTTTCATT  |
| TATTTTCATTTTCGGCAAATTGCCGGTTTGCCGATTTGCCGGG                                                                                                       |                        |   |          |          |       |     |     |             |
| UNSB01.fasta                                                                                                                                      | Cele-UNSB01_2:12892893 | 2 | 12892893 | 12893074 | 182   | 4   | 45  | ATCTGATCCT  |
| ATCTGATCCTTCAGCTCCGAAGGATCAGAAGGGTACCTCCTGGTG                                                                                                     |                        |   |          |          |       |     |     |             |
| UNSB01.fasta                                                                                                                                      | Cele-UNSB01_2:12900948 | 2 | 12900948 | 12901228 | 281   | 8   | 35  | ATTTCCAGGCA |
| ATTTCCAGGCAATTTACCGATTGGCCAGAAATGTTTC                                                                                                             |                        |   |          |          |       |     |     |             |
| UNSB01.fasta                                                                                                                                      | Cele-UNSB01_2:12905171 | 2 | 12905171 | 12905894 | 724   | 9   | 14  | AACTACAAAC  |
| AACTATAAACTACA                                                                                                                                    |                        |   |          |          |       |     |     |             |
| UNSB01.fasta                                                                                                                                      | Cele-UNSB01_2:12906532 | 2 | 12906532 | 12906652 | 121   | 7   | 15  | ATTTCCGGAT  |
| ATTTCCGGATCTATG                                                                                                                                   |                        |   |          |          |       |     |     |             |
| UNSB01.fasta                                                                                                                                      | Cele-UNSB01_2:12914019 | 2 | 12914019 | 12914481 | 463   | 11  | 35  | TCAATTCGGG  |
| TCAATTCGGGCAATTTTCCGGTTTGCCGGAAAAAT                                                                                                               |                        |   |          |          |       |     |     |             |
| UNSB01.fasta                                                                                                                                      | Cele-UNSB01_2:12938825 | 2 | 12938825 | 12939101 | 277   | 8   | 35  | TGTGTAATAA  |
| TGTGTAATAAGAAAAATTTCAAATGTTTTTCACGAG                                                                                                              |                        |   |          |          |       |     |     |             |
| UNSB01.fasta                                                                                                                                      | Cele-UNSB01_2:12968710 | 2 | 12968710 | 12969129 | 420   | 28  | 12  | GGCTTAGGCT  |
| GGCTTAGGCTTA                                                                                                                                      |                        |   |          |          |       |     |     |             |
| UNSB01.fasta                                                                                                                                      | Cele-UNSB01_2:12988123 | 2 | 12988123 | 12990065 | 1943  | 72  | 27  | GTGGGAAGCC  |
| GTGGGAAGCCACAGAGAGTAAAATATA                                                                                                                       |                        |   |          |          |       |     |     |             |
| UNSB01.fasta                                                                                                                                      | Cele-UNSB01_2:12990090 | 2 | 12990090 | 13000798 | 10709 | 416 | 25  | TGGCTTCCCA  |
| TGGCTTCCCACTATATTTTACTCTC                                                                                                                         |                        |   |          |          |       |     |     |             |
| UNSB01.fasta                                                                                                                                      | Cele-UNSB01_2:13043920 | 2 | 13043920 | 13044316 | 397   | 21  | 18  | ACTACTGTAT  |
| ACTACTGTATCGCAAGAT                                                                                                                                |                        |   |          |          |       |     |     |             |
| UNSB01.fasta                                                                                                                                      | Cele-UNSB01_2:13060029 | 2 | 13060029 | 13060418 | 390   | 5   | 43  | GATTTGCCGG  |
| GATTTGCCGGAAATTTTCAATCCCGGCAAATTGCAGGTTTGCC                                                                                                       |                        |   |          |          |       |     |     |             |
| UNSB01.fasta                                                                                                                                      | Cele-UNSB01_2:13097657 | 2 | 13097657 | 13097799 | 143   | 5   | 18  | CCTAAGCCTA  |
| CCTGAGCCTAAGCTCAAC                                                                                                                                |                        |   |          |          |       |     |     |             |
| UNSB01.fasta                                                                                                                                      | Cele-UNSB01_2:13106081 | 2 | 13106081 | 13106253 | 173   | 4   | 43  | CGGCAAATTA  |
| CGGCAAATTACCAATTTGCCGATTGGCCGAAATTTTCATTTT                                                                                                        |                        |   |          |          |       |     |     |             |
| UNSB01.fasta                                                                                                                                      | Cele-UNSB01_2:13133064 | 2 | 13133064 | 13133208 | 145   | 9   | 16  | GCCTACATGC  |
| GCCTACATGCCTACAT                                                                                                                                  |                        |   |          |          |       |     |     |             |
| UNSB01.fasta                                                                                                                                      | Cele-UNSB01_2:13134300 | 2 | 13134300 | 13134450 | 151   | 4   | 30  | TTCAGGCAGG  |
| TTCAGGCAGGTATAGGTTTCTTTGAAAATT                                                                                                                    |                        |   |          |          |       |     |     |             |
| UNSB01.fasta                                                                                                                                      | Cele-UNSB01_2:13161799 | 2 | 13161799 | 13161943 | 145   | 6   | 19  | TATGGTGCAT  |
| TATGGTGCATTTAACTAGT                                                                                                                               |                        |   |          |          |       |     |     |             |
| UNSB01.fasta                                                                                                                                      | Cele-UNSB01_2:13192718 | 2 | 13192718 | 13192854 | 137   | 4   | 34  | TTCAATTCCG  |
| TTCAATTCGGTAACTCGTCGATTTTTCGGAAAT                                                                                                                 |                        |   |          |          |       |     |     |             |
| UNSB01.fasta                                                                                                                                      | Cele-UNSB01_2:13216705 | 2 | 13216705 | 13216849 | 145   | 8   | 16  | TAGGCACGTA  |
| TAGGTACGTAGGCACA                                                                                                                                  |                        |   |          |          |       |     |     |             |
| UNSB01.fasta                                                                                                                                      | Cele-UNSB01_2:13339084 | 2 | 13339084 | 13339231 | 148   | 7   | 21  | AATCTAGCCA  |
| AATCTAGCCAGACGCACACCT                                                                                                                             |                        |   |          |          |       |     |     |             |
| UNSB01.fasta                                                                                                                                      | Cele-UNSB01_2:13398823 | 2 | 13398823 | 13400207 | 1385  | 8   | 165 | AAAAATTCAT  |
| AAAAATTCGATTTTGGACTTATCTATTCTCTTTTTTATAACATGTATTTTCAGTTGATAGAGGACTCAAATTTATAATGCTCGTAATTTATTATAAGTGTGTTGTCTCAGAATCAATTCTAAAAACAGATTTTTTTTGAAGTTTA |                        |   |          |          |       |     |     |             |
| AGTAATATCCCGGAG                                                                                                                                   |                        |   |          |          |       |     |     |             |
| UNSB01.fasta                                                                                                                                      | Cele-UNSB01_2:13437444 | 2 | 13437444 | 13437847 | 404   | 10  | 31  | CACGCCTATT  |
| CACGCCTATTTTGTGGGAGGAGTCTACAAGC                                                                                                                   |                        |   |          |          |       |     |     |             |
| UNSB01.fasta                                                                                                                                      | Cele-UNSB01_2:13440285 | 2 | 13440285 | 13440859 | 575   | 12  | 48  | TGCCTACGTG  |
| TGCCTACGTGCTGCAAAACAGGCGTGGGCAGCTTTAAAGGTGATGTA                                                                                                   |                        |   |          |          |       |     |     |             |
| UNSB01.fasta                                                                                                                                      | Cele-UNSB01_2:13459229 | 2 | 13459229 | 13459607 | 379   | 13  | 14  | TAGTTTGTAG  |
| TAGTTTGTAGTTA                                                                                                                                     |                        |   |          |          |       |     |     |             |
| UNSB01.fasta                                                                                                                                      | Cele-UNSB01_2:13460078 | 2 | 13460078 | 13460334 | 257   | 15  | 16  | GGCATGTAGG  |
| GGAATGTAGGCATGTA                                                                                                                                  |                        |   |          |          |       |     |     |             |
| UNSB01.fasta                                                                                                                                      | Cele-UNSB01_2:13465788 | 2 | 13465788 | 13466109 | 322   | 20  | 16  | GGCATGTAGG  |
| GGCATATAGGCATGTA                                                                                                                                  |                        |   |          |          |       |     |     |             |
| UNSB01.fasta                                                                                                                                      | Cele-UNSB01_2:13474627 | 2 | 13474627 | 13476516 | 1890  | 78  | 20  | AAAAATTGAA  |
| AAAAATTGAATTTTTAAGCC                                                                                                                              |                        |   |          |          |       |     |     |             |

|                                                                                                                            |                        |   |          |          |      |     |     |             |
|----------------------------------------------------------------------------------------------------------------------------|------------------------|---|----------|----------|------|-----|-----|-------------|
| UNSB01.fasta                                                                                                               | Cele-UNSB01_2:13490523 | 2 | 13490523 | 13491161 | 639  | 5   | 122 | GATCTACAAA  |
| GATCTACAAAACGCGGGAAAAGTGACGCAGAGTTTTGAACTGATTTTGCATAAAAATTCCCGCATTTTTTTGTAGATCAAACCGTTATGGGACAGCCTGGTGCCACGTGCTTGATCTACGCA |                        |   |          |          |      |     |     |             |
| UNSB01.fasta                                                                                                               | Cele-UNSB01_2:13499104 | 2 | 13499104 | 13499209 | 106  | 5   | 21  | CTAGAAAAAC  |
| CTAGAAAAACTCGGCCATCAA                                                                                                      |                        |   |          |          |      |     |     |             |
| UNSB01.fasta                                                                                                               | Cele-UNSB01_2:13500094 | 2 | 13500094 | 13501231 | 1138 | 46  | 21  | TTTTCTAGTT  |
| TTTCCTAGTTGATAGCCGAGT                                                                                                      |                        |   |          |          |      |     |     |             |
| UNSB01.fasta                                                                                                               | Cele-UNSB01_2:13509974 | 2 | 13509974 | 13510060 | 87   | 6   | 12  | CTTAGGCTTA  |
| CTTAGGCTTAGT                                                                                                               |                        |   |          |          |      |     |     |             |
| UNSB01.fasta                                                                                                               | Cele-UNSB01_2:13528433 | 2 | 13528433 | 13528477 | 45   | 4   | 11  | TGGAAAATTG  |
| TGGAAAATTGA                                                                                                                |                        |   |          |          |      |     |     |             |
| UNSB01.fasta                                                                                                               | Cele-UNSB01_2:13541965 | 2 | 13541965 | 13542724 | 760  | 8   | 95  | GGCCTGCGGC  |
| GGCCTGCGGCCCTCAAACCTGGTTGGTAGGCTTTGAGCGAATAACAATCTGCTTGAATAGGATTAAAGCTGGCCCTTATTTTTTCATGAGTATTCA                           |                        |   |          |          |      |     |     |             |
| UNSB01.fasta                                                                                                               | Cele-UNSB01_2:13551182 | 2 | 13551182 | 13551985 | 804  | 20  | 35  | GATTTGCCGG  |
| GATTTGCGGGAAATGTTCAATTCGGCAATTTACT                                                                                         |                        |   |          |          |      |     |     |             |
| UNSB01.fasta                                                                                                               | Cele-UNSB01_2:13571681 | 2 | 13571681 | 13571955 | 275  | 20  | 11  | CCTACAGTAC  |
| CCTATAGTACC                                                                                                                |                        |   |          |          |      |     |     |             |
| UNSB01.fasta                                                                                                               | Cele-UNSB01_2:13579229 | 2 | 13579229 | 13580664 | 1436 | 41  | 35  | GAATTTTTTGA |
| GAGTTTTTTGATTTTCGGCAATTTGCCAATTTGCCA                                                                                       |                        |   |          |          |      |     |     |             |
| UNSB01.fasta                                                                                                               | Cele-UNSB01_2:13658533 | 2 | 13658533 | 13659809 | 1277 | 26  | 27  | AGCAGCCGAC  |
| AGCAGCCGACGCCTTGCGGGTCGCTCA                                                                                                |                        |   |          |          |      |     |     |             |
| UNSB01.fasta                                                                                                               | Cele-UNSB01_2:13663688 | 2 | 13663688 | 13663784 | 97   | 6   | 16  | ACATGCCTAC  |
| ACATGCCTACATGCCT                                                                                                           |                        |   |          |          |      |     |     |             |
| UNSB01.fasta                                                                                                               | Cele-UNSB01_2:13678541 | 2 | 13678541 | 13678601 | 61   | 5   | 12  | AATACCAACC  |
| AATACCAACCAC                                                                                                               |                        |   |          |          |      |     |     |             |
| UNSB01.fasta                                                                                                               | Cele-UNSB01_2:13684820 | 2 | 13684820 | 13685366 | 547  | 24  | 20  | GTAAATCGAC  |
| GTAAATCGACAAAAGACATC                                                                                                       |                        |   |          |          |      |     |     |             |
| UNSB01.fasta                                                                                                               | Cele-UNSB01_2:13754985 | 2 | 13754985 | 13755264 | 280  | 7   | 35  | TTGCCGGAAT  |
| TTGCCGGAATTGAATATTTGCGGCAATCTGTAAAT                                                                                        |                        |   |          |          |      |     |     |             |
| UNSB01.fasta                                                                                                               | Cele-UNSB01_2:13755448 | 2 | 13755448 | 13762935 | 7488 | 166 | 45  | ACCAGGAGGT  |
| ACCAGGAGGTACTCTTCTTATCCTTCGGAGCTGAATGATCAGATC                                                                              |                        |   |          |          |      |     |     |             |
| UNSB01.fasta                                                                                                               | Cele-UNSB01_2:13794379 | 2 | 13794379 | 13794568 | 190  | 10  | 16  | CCTACATGCC  |
| CCTACATGCCTACATG                                                                                                           |                        |   |          |          |      |     |     |             |
| UNSB01.fasta                                                                                                               | Cele-UNSB01_2:13805325 | 2 | 13805325 | 13805605 | 281  | 7   | 35  | CTTGCCGATT  |
| CTTGCCGATTTGCCGAAATTTTCAATTCGGCAA                                                                                          |                        |   |          |          |      |     |     |             |
| UNSB01.fasta                                                                                                               | Cele-UNSB01_2:13813351 | 2 | 13813351 | 13813423 | 73   | 6   | 12  | TAGGCTTAGG  |
| TAGGCTTAGGCT                                                                                                               |                        |   |          |          |      |     |     |             |
| UNSB01.fasta                                                                                                               | Cele-UNSB01_2:13831609 | 2 | 13831609 | 13831953 | 345  | 12  | 27  | TTCCGGCAAA  |
| TTCCGGCAAATCGGCAATTTTGAAAAT                                                                                                |                        |   |          |          |      |     |     |             |
| UNSB01.fasta                                                                                                               | Cele-UNSB01_2:13844810 | 2 | 13844810 | 13844989 | 180  | 5   | 36  | TTGCCTAAAA  |
| TTGCCTAAAAATTAATTTCCGGCAAATCAGCAAAT                                                                                        |                        |   |          |          |      |     |     |             |
| UNSB01.fasta                                                                                                               | Cele-UNSB01_2:13878619 | 2 | 13878619 | 13878763 | 145  | 10  | 12  | GCCTAAGCCT  |
| GCCGAAGCCTAA                                                                                                               |                        |   |          |          |      |     |     |             |
| UNSB01.fasta                                                                                                               | Cele-UNSB01_2:13900624 | 2 | 13900624 | 13901003 | 380  | 15  | 21  | CTCGTAAATC  |
| CTCGTAGATCGACAAGAACTC                                                                                                      |                        |   |          |          |      |     |     |             |
| UNSB01.fasta                                                                                                               | Cele-UNSB01_2:13903082 | 2 | 13903082 | 13903160 | 79   | 5   | 13  | GGCTTCTAGT  |
| GGCTTCTAGTCTA                                                                                                              |                        |   |          |          |      |     |     |             |
| UNSB01.fasta                                                                                                               | Cele-UNSB01_2:13911573 | 2 | 13911573 | 13912594 | 1022 | 28  | 35  | TTTGCCGGAA  |
| TTTGCTGGAAATTTTCAAATCCGGCAAATTGCTGC                                                                                        |                        |   |          |          |      |     |     |             |
| UNSB01.fasta                                                                                                               | Cele-UNSB01_2:13932545 | 2 | 13932545 | 13934837 | 2293 | 68  | 35  | CCGGAATTGA  |
| CCGGAATTGAAAATTCTTGAAAATCGGCAAATTG                                                                                         |                        |   |          |          |      |     |     |             |
| UNSB01.fasta                                                                                                               | Cele-UNSB01_2:13962674 | 2 | 13962674 | 13962948 | 275  | 23  | 10  | CCGCTACCGC  |
| CCGCTACCGC                                                                                                                 |                        |   |          |          |      |     |     |             |
| UNSB01.fasta                                                                                                               | Cele-UNSB01_2:13967191 |   |          |          |      |     |     |             |

|                                                              |                        |   |          |          |      |    |    |             |
|--------------------------------------------------------------|------------------------|---|----------|----------|------|----|----|-------------|
| UNSB01.fasta                                                 | Cele-UNSB01_2:13977826 | 2 | 13977826 | 13977988 | 163  | 10 | 12 | GCCTAAGCCTT |
| GCCTAAGCCTTA                                                 |                        |   |          |          |      |    |    |             |
| UNSB01.fasta                                                 | Cele-UNSB01_2:13981365 | 2 | 13981365 | 13981461 | 97   | 7  | 12 | TTAGGCTTAG  |
| TTCGGCTTAGGA                                                 |                        |   |          |          |      |    |    |             |
| UNSB01.fasta                                                 | Cele-UNSB01_2:14003653 | 2 | 14003653 | 14004477 | 825  | 18 | 34 | AATTCCGGCA  |
| AATTCCGGCAACTTGCCTATTTTCCGGAATTTTC                           |                        |   |          |          |      |    |    |             |
| UNSB01.fasta                                                 | Cele-UNSB01_2:14078695 | 2 | 14078695 | 14078860 | 166  | 5  | 33 | AAAATTTGAA  |
| AAAATTCGAATTTGGCGCCAAAATTTTTCACAA                            |                        |   |          |          |      |    |    |             |
| UNSB01.fasta                                                 | Cele-UNSB01_2:14106829 | 2 | 14106829 | 14106943 | 115  | 7  | 12 | AGCCTAAGCC  |
| ACCTAAGCCTAC                                                 |                        |   |          |          |      |    |    |             |
| UNSB01.fasta                                                 | Cele-UNSB01_2:14136989 | 2 | 14136989 | 14138428 | 1440 | 41 | 14 | TACAAACTAC  |
| TACAAACTACAAAC                                               |                        |   |          |          |      |    |    |             |
| UNSB01.fasta                                                 | Cele-UNSB01_2:14141898 | 2 | 14141898 | 14142455 | 558  | 7  | 62 | TGCTAACTAG  |
| TGCTAACTAGCGCGGCCTGCTTAGGTGCGCGTGCAGAAAGCAGTCTGGTTTAATGTCGGC |                        |   |          |          |      |    |    |             |
| UNSB01.fasta                                                 | Cele-UNSB01_2:14148263 | 2 | 14148263 | 14148341 | 79   | 6  | 12 | GGCTTTGGCT  |
| GGCTTTGGCTTT                                                 |                        |   |          |          |      |    |    |             |
| UNSB01.fasta                                                 | Cele-UNSB01_2:14148276 | 2 | 14148276 | 14148504 | 229  | 14 | 12 | GCTTAGGCTT  |
| GCTTCGGCTTTG                                                 |                        |   |          |          |      |    |    |             |
| UNSB01.fasta                                                 | Cele-UNSB01_2:14178132 | 2 | 14178132 | 14178499 | 368  | 11 | 11 | GTACTGTAGG  |
| GTACTGTAGGA                                                  |                        |   |          |          |      |    |    |             |
| UNSB01.fasta                                                 | Cele-UNSB01_2:14178691 | 2 | 14178691 | 14179588 | 898  | 30 | 30 | TTTCTAGAAA  |
| TTTCTAGAAACATTTGGAACTTCTAGAAC                                |                        |   |          |          |      |    |    |             |
| UNSB01.fasta                                                 | Cele-UNSB01_2:14194765 | 2 | 14194765 | 14194942 | 178  | 5  | 14 | GTAGTTTGTA  |
| GTAGTTGTAGCTT                                                |                        |   |          |          |      |    |    |             |
| UNSB01.fasta                                                 | Cele-UNSB01_2:14195501 | 2 | 14195501 | 14195591 | 91   | 5  | 12 | TAGGCTTAGG  |
| TAGCCTTAGGCC                                                 |                        |   |          |          |      |    |    |             |
| UNSB01.fasta                                                 | Cele-UNSB01_2:14213145 | 2 | 14213145 | 14213210 | 66   | 4  | 12 | TAGGCTTAGG  |
| TAGGCTTAGGTT                                                 |                        |   |          |          |      |    |    |             |
| UNSB01.fasta                                                 | Cele-UNSB01_2:14289556 | 2 | 14289556 | 14289862 | 307  | 8  | 34 | CCGTGCCTAC  |
| CCGTGCCTACTAACCTACCGACCTTGCCTGCCTC                           |                        |   |          |          |      |    |    |             |
| UNSB01.fasta                                                 | Cele-UNSB01_2:14294397 | 2 | 14294397 | 14294650 | 254  | 11 | 18 | CTAGGTGCCT  |
| CTAGGTACCTATCCATTC                                           |                        |   |          |          |      |    |    |             |
| UNSB01.fasta                                                 | Cele-UNSB01_2:14297875 | 2 | 14297875 | 14298051 | 177  | 10 | 16 | TAGGCATATA  |
| TAGGCATATAGGCTTA                                             |                        |   |          |          |      |    |    |             |
| UNSB01.fasta                                                 | Cele-UNSB01_2:14303812 | 2 | 14303812 | 14304194 | 383  | 12 | 22 | CTACAGTAAC  |
| CTACAGTAACCCTAGTTTTGAA                                       |                        |   |          |          |      |    |    |             |
| UNSB01.fasta                                                 | Cele-UNSB01_2:14320079 | 2 | 14320079 | 14320251 | 173  | 4  | 43 | GAAAACTAGG  |
| GAAAACTAGGCCACGGAGTTCAAATTGATGGCCGAGAAGTCTA                  |                        |   |          |          |      |    |    |             |
| UNSB01.fasta                                                 | Cele-UNSB01_2:14326178 | 2 | 14326178 | 14326688 | 511  | 14 | 34 | CGGAATTGAA  |
| CGGAATTGAAATTTCTGGCAAATTGGTAAATGC                            |                        |   |          |          |      |    |    |             |
| UNSB01.fasta                                                 | Cele-UNSB01_2:14355758 | 2 | 14355758 | 14355994 | 237  | 18 | 12 | ATAGGCATAG  |
| ATAGGCATAGGC                                                 |                        |   |          |          |      |    |    |             |
| UNSB01.fasta                                                 | Cele-UNSB01_2:14379544 | 2 | 14379544 | 14380198 | 655  | 13 | 13 | TATACAAAAA  |
| TATACAAAATGAA                                                |                        |   |          |          |      |    |    |             |
| UNSB01.fasta                                                 | Cele-UNSB01_2:14381587 | 2 | 14381587 | 14382260 | 674  | 16 | 42 | AAAACCGGCA  |
| AAAACCTGGCAATTGCCAAAATTGCCGATTGCCGGGAAGATTG                  |                        |   |          |          |      |    |    |             |
| UNSB01.fasta                                                 | Cele-UNSB01_2:14401364 | 2 | 14401364 | 14401594 | 231  | 10 | 21 | CAATTTTCTG  |
| CAATTTTCTGTTAACTTTGG                                         |                        |   |          |          |      |    |    |             |
| UNSB01.fasta                                                 | Cele-UNSB01_2:14428274 | 2 | 14428274 | 14428974 | 701  | 18 | 35 | GCAAATCGGC  |
| GCAAATCGGCAAATTGTCGGCATGGAAATTTTCCG                          |                        |   |          |          |      |    |    |             |
| UNSB01.fasta                                                 | Cele-UNSB01_2:14453377 | 2 | 14453377 | 14453692 | 316  | 8  | 35 | CGGCAAATCG  |
| CGGCAAATCGGCAAATTGCCGGAAGTGTAAATTTTC                         |                        |   |          |          |      |    |    |             |
| UNSB01.fasta                                                 | Cele-UNSB01_2:14458676 | 2 | 14458676 | 14459058 | 383  | 11 | 35 | CCGGCAAATC  |
| CCGGCAAATGGGCAAATTGCCGAAATGAAAGCAT                           |                        |   |          |          |      |    |    |             |
| UNSB01.fasta                                                 | Cele-UNSB01_2:14462473 | 2 | 14462473 | 14462688 | 216  | 5  | 35 | CGGCAAATTG  |
| CGGCAAATCGGCTAATTGCCGAAATTGAAAATTTTC                         |                        |   |          |          |      |    |    |             |
| UNSB01.fasta                                                 | Cele-UNSB01_2:14464146 | 2 | 14464146 | 14465077 | 932  | 26 | 32 | AACCAATCAG  |
| AACCAATCAGCGATGGGCTCCACCCTTTTGA                              |                        |   |          |          |      |    |    |             |

|                                                                                                                                                       |                        |   |          |          |       |      |     |            |
|-------------------------------------------------------------------------------------------------------------------------------------------------------|------------------------|---|----------|----------|-------|------|-----|------------|
| UNSB01.fasta                                                                                                                                          | Cele-UNSB01_2:14513028 | 2 | 14513028 | 14524678 | 11651 | 63   | 185 | CTCGGACATA |
| CTCGGACATAATTGGTGTCTGTATTCACTTATGATACGTTCCGGCTGCGTACGTTGGCCAAGAGTGTCTAGTAAGAGAATTTCAATTTAGAATATGAACAATTTGGGTAATTGGAAAGTGTCTTCGGGAATCTTTATACATCCGACAAA |                        |   |          |          |       |      |     |            |
| TTCGAGTATGTTAATATTCTGAATTGGATTCTTTTT                                                                                                                  |                        |   |          |          |       |      |     |            |
| UNSB01.fasta                                                                                                                                          | Cele-UNSB01_2:14526196 | 2 | 14526196 | 14534994 | 8799  | 53   | 166 | TCGTAATTAT |
| TCGTAATTATTCATAAGTTTGTGTGTCTCAGAGCCATGCTCGAAAAACAGATTTTTTTTCGAAAAATTTAAAAAGTTCGTAAAAATTGGATTTTGACAAATCTATGCTCTCTTTTTTTGTTTGAAATTTAGTTCAGTGACATACAA    |                        |   |          |          |       |      |     |            |
| TTTCAAAAATATAATGT                                                                                                                                     |                        |   |          |          |       |      |     |            |
| UNSB01.fasta                                                                                                                                          | Cele-UNSB01_2:14535014 | 2 | 14535014 | 14566604 | 31591 | 1170 | 27  | TGTGGCTTCC |
| TGTGGCTTCCCACTATATTTTACTCTC                                                                                                                           |                        |   |          |          |       |      |     |            |
| UNSB01.fasta                                                                                                                                          | Cele-UNSB01_2:14573634 | 2 | 14573634 | 14573711 | 78    | 5    | 15  | CGAAAAGGGG |
| CGAAAAGGGGATCTG                                                                                                                                       |                        |   |          |          |       |      |     |            |
| UNSB01.fasta                                                                                                                                          | Cele-UNSB01_2:14573886 | 2 | 14573886 | 14573978 | 93    | 6    | 15  | TCCCCTTTTC |
| TCCCCTTTTCGTATC                                                                                                                                       |                        |   |          |          |       |      |     |            |
| UNSB01.fasta                                                                                                                                          | Cele-UNSB01_2:14582719 | 2 | 14582719 | 14582837 | 119   | 5    | 18  | TAGTCTTGCA |
| TAGTCTTGCAAGCCTCTAT                                                                                                                                   |                        |   |          |          |       |      |     |            |
| UNSB01.fasta                                                                                                                                          | Cele-UNSB01_2:14966230 | 2 | 14966230 | 14966326 | 97    | 6    | 16  | GCAGTTTGCC |
| GCCGTTTGCCGAATTG                                                                                                                                      |                        |   |          |          |       |      |     |            |
| UNSB01.fasta                                                                                                                                          | Cele-UNSB01_2:15007973 | 2 | 15007973 | 15008319 | 347   | 4    | 35  | TCCGGCAAAT |
| TCCGGCAATTTCCGATTTGCCGAAACTTTCAAT                                                                                                                     |                        |   |          |          |       |      |     |            |
| UNSB01.fasta                                                                                                                                          | Cele-UNSB01_2:15030456 | 2 | 15030456 | 15030601 | 146   | 7    | 21  | ATTGGATTAG |
| ATTCGATTAGATTTTCGTCCAT                                                                                                                                |                        |   |          |          |       |      |     |            |
| UNSB01.fasta                                                                                                                                          | Cele-UNSB01_2:15064033 | 2 | 15064033 | 15064173 | 141   | 5    | 30  | TTCTGGAAAA |
| TTCTGGAAAAATCTAAAAAGCTTTAGAAC                                                                                                                         |                        |   |          |          |       |      |     |            |
| UNSB01.fasta                                                                                                                                          | Cele-UNSB01_2:15064232 | 2 | 15064232 | 15064367 | 136   | 9    | 15  | AGACCCATCG |
| AGGCCCATCGTTGTG                                                                                                                                       |                        |   |          |          |       |      |     |            |
| UNSB01.fasta                                                                                                                                          | Cele-UNSB01_2:15064421 | 2 | 15064421 | 15065299 | 879   | 25   | 35  | TTAAATTTTC |
| TTAAATTTTCTGAAAAAATATTTTGGAGGGAAAT                                                                                                                    |                        |   |          |          |       |      |     |            |
| UNSB01.fasta                                                                                                                                          | Cele-UNSB01_2:15097668 | 2 | 15097668 | 15098195 | 528   | 13   | 35  | TTTCCGGCAA |
| TTTCCGGCAAATCGGCGAATTGCATTAATTTAAAA                                                                                                                   |                        |   |          |          |       |      |     |            |
| UNSB01.fasta                                                                                                                                          | Cele-UNSB01_2:15105694 | 2 | 15105694 | 15106081 | 388   | 11   | 35  | CAGAAAATTT |
| CAGAAAATTTAAATTTCCCGCCAAAATATTTTCA                                                                                                                    |                        |   |          |          |       |      |     |            |
| UNSB01.fasta                                                                                                                                          | Cele-UNSB01_2:15106134 | 2 | 15106134 | 15106254 | 121   | 7    | 15  | CCACGATGGG |
| CCACGATGGGTCTCA                                                                                                                                       |                        |   |          |          |       |      |     |            |
| UNSB01.fasta                                                                                                                                          | Cele-UNSB01_2:15106314 | 2 | 15106314 | 15106454 | 141   | 5    | 30  | AATTTTCCAG |
| AATTTTCCAGAAAGTTCTGGAACATTCCAG                                                                                                                        |                        |   |          |          |       |      |     |            |
| UNSB01.fasta                                                                                                                                          | Cele-UNSB01_2:15121230 | 2 | 15121230 | 15121314 | 85    | 6    | 12  | TTAGGCTTAG |
| TTAGGCTAAGGT                                                                                                                                          |                        |   |          |          |       |      |     |            |
| UNSB01.fasta                                                                                                                                          | Cele-UNSB01_2:15182818 | 2 | 15182818 | 15182878 | 61    | 5    | 12  | AAGCCTAAGC |
| AAGCCCAAGCCT                                                                                                                                          |                        |   |          |          |       |      |     |            |
| UNSB01.fasta                                                                                                                                          | Cele-UNSB01_2:15212191 | 2 | 15212191 | 15212515 | 325   | 14   | 20  | TTCAGTCAAA |
| TTCAGTCAAAATTTAGATTT                                                                                                                                  |                        |   |          |          |       |      |     |            |
| UNSB01.fasta                                                                                                                                          | Cele-UNSB01_2:15219171 | 2 | 15219171 | 15219261 | 91    | 6    | 15  | TCGTGGCGAG |
| TCGTGGCGAGACCT                                                                                                                                        |                        |   |          |          |       |      |     |            |
| UNSB01.fasta                                                                                                                                          | Cele-UNSB01_2:15219280 | 2 | 15219280 | 15219502 | 223   | 7    | 32  | TTTTGGCGGG |
| TTTCGGCGGGAATTCAAATTTTCTGTGAAAAAT                                                                                                                     |                        |   |          |          |       |      |     |            |
| UNSB01.fasta                                                                                                                                          | Cele-UNSB01_2:15221118 | 2 | 15221118 | 15221238 | 121   | 8    | 15  | GGTGAGACCC |
| GGTGAGACCCATCGT                                                                                                                                       |                        |   |          |          |       |      |     |            |
| UNSB01.fasta                                                                                                                                          | Cele-UNSB01_2:15221118 | 2 | 15221118 | 15221591 | 474   | 14   | 15  | GGTGAGACCC |
| GGTGAGACCCATCGT                                                                                                                                       |                        |   |          |          |       |      |     |            |
| UNSB01.fasta                                                                                                                                          | Cele-UNSB01_2:15221267 | 2 | 15221267 | 15222837 | 1571  | 42   | 32  | TTTTGGCGGG |
| TTTTGGCGGGAATTCAAATTTTCTCTGAAAAAT                                                                                                                     |                        |   |          |          |       |      |     |            |
| UNSB01.fasta                                                                                                                                          | Cele-UNSB01_2:15224452 | 2 | 15224452 | 15224572 | 121   | 8    | 15  | GGTGAGACCC |
| GGTGAGACCCATCGT                                                                                                                                       |                        |   |          |          |       |      |     |            |
| UNSB01.fasta                                                                                                                                          | Cele-UNSB01_2:15224452 | 2 | 15224452 | 15225368 | 917   | 26   | 15  | GGTGAGACCC |
| GGTGAGACCCATCGT                                                                                                                                       |                        |   |          |          |       |      |     |            |
| UNSB01.fasta                                                                                                                                          | Cele-UNSB01_2:15224601 | 2 | 15224601 | 15228185 | 3585  | 96   | 32  | TTTTGGCGGG |
| TTTTGGCGGGAATTTAAATTTTCTTTGAAAAAT                                                                                                                     |                        |   |          |          |       |      |     |            |
| UNSB01.fasta                                                                                                                                          | Cele-UNSB01_2:15229801 | 2 | 15229801 | 15229921 | 121   | 8    | 15  | GGTGAGACCC |
| GGTGAGACCCATCGT                                                                                                                                       |                        |   |          |          |       |      |     |            |



|                                                                                                                                                    |                        |   |          |          |      |     |     |             |
|----------------------------------------------------------------------------------------------------------------------------------------------------|------------------------|---|----------|----------|------|-----|-----|-------------|
| UNSB01.fasta                                                                                                                                       | Cele-UNSB01_2:15229801 | 2 | 15229801 | 15230289 | 489  | 15  | 15  | GGTGAGACCC  |
| GGTGAGACCCATCGT                                                                                                                                    |                        |   |          |          |      |     |     |             |
| UNSB01.fasta                                                                                                                                       | Cele-UNSB01_2:15229950 | 2 | 15229950 | 15234144 | 4195 | 125 | 32  | TTTTGGCGGG  |
| TTTTGGCGGGAATTCAAATTTTCTTTGAAAAAT                                                                                                                  |                        |   |          |          |      |     |     |             |
| UNSB01.fasta                                                                                                                                       | Cele-UNSB01_2:15235758 | 2 | 15235758 | 15235848 | 91   | 6   | 15  | GGTGAGACCC  |
| GGTGAGACCCATCGT                                                                                                                                    |                        |   |          |          |      |     |     |             |
| UNSB01.fasta                                                                                                                                       | Cele-UNSB01_2:15235864 | 2 | 15235864 | 15236243 | 380  | 11  | 34  | TTGGCGGGGAA |
| TTGGCGGGGAAATTCAAATTTTCAGTGAAAAAATT                                                                                                                |                        |   |          |          |      |     |     |             |
| UNSB01.fasta                                                                                                                                       | Cele-UNSB01_2:15242777 | 2 | 15242777 | 15242951 | 175  | 9   | 15  | AGACCCATCG  |
| AGACCCATCGTGGCG                                                                                                                                    |                        |   |          |          |      |     |     |             |
| UNSB01.fasta                                                                                                                                       | Cele-UNSB01_2:15242891 | 2 | 15242891 | 15243160 | 270  | 5   | 35  | ATTTTGGCGG  |
| ATTTTGGCGGGTAATTTAAATATTCGGAGAAAAAT                                                                                                                |                        |   |          |          |      |     |     |             |
| UNSB01.fasta                                                                                                                                       | Cele-UNSB01_2:15286316 | 2 | 15286316 | 15286491 | 176  | 5   | 35  | TTTGCCGGAA  |
| TTTGCCGGAAATTTTAAATTTCTGGCAATTTGCCGA                                                                                                               |                        |   |          |          |      |     |     |             |
| UNSB01.fasta                                                                                                                                       | Cele-UNSB01_2:15290141 | 2 | 15290141 | 15290702 | 562  | 16  | 35  | TTTGCCGGAA  |
| TTTGCCGGAAAGTTTCAATTCAGGCAACTTGTCGT                                                                                                                |                        |   |          |          |      |     |     |             |
| UNSB01.fasta                                                                                                                                       | Cele-UNSB01_2:15354583 | 2 | 15354583 | 15354863 | 281  | 8   | 35  | TTTGCCGGAA  |
| TTTGCCGGAAATTTTCAATTCGGCAATATACTGA                                                                                                                 |                        |   |          |          |      |     |     |             |
| UNSB01.fasta                                                                                                                                       | Cele-UNSB01_2:15381973 | 2 | 15381973 | 15383739 | 1767 | 38  | 15  | GGGTCTCACC  |
| GGGTCTCACCACAAC                                                                                                                                    |                        |   |          |          |      |     |     |             |
| UNSB01.fasta                                                                                                                                       | Cele-UNSB01_2:15429658 | 2 | 15429658 | 15431122 | 1465 | 9   | 163 | AAATAAAAAA  |
| AAATAAAAAAGAATGACTCCATATGATTTTCCATACTTTTGAAATTTTGAAAAAATCAGCTTTTATATATTTTATCAATTTTAAAAAAATACTTCCGTACAAGCTAATATACTTTGATTGGCATATTCTGGTAATTTTAACTATGC |                        |   |          |          |      |     |     |             |
| TGAACAGTTTTATG                                                                                                                                     |                        |   |          |          |      |     |     |             |
| UNSB01.fasta                                                                                                                                       | Cele-UNSB01_2:15432049 | 2 | 15432049 | 15432695 | 647  | 18  | 34  | TTTCAATTCC  |
| TTTCAATTCGGCAATTTGTGATTTGCCGGAAA                                                                                                                   |                        |   |          |          |      |     |     |             |
| UNSB01.fasta                                                                                                                                       | Cele-UNSB01_2:15437952 | 2 | 15437952 | 15438032 | 81   | 4   | 20  | TGTAGATTTA  |
| TGTAGATTTACGCGGGATGG                                                                                                                               |                        |   |          |          |      |     |     |             |
| UNSB01.fasta                                                                                                                                       | Cele-UNSB01_2:15454038 | 2 | 15454038 | 15454614 | 577  | 12  | 35  | CCGATTTGCC  |
| CCGATTTTCCGGAAATTTCGAATTCGGCAACTTC                                                                                                                 |                        |   |          |          |      |     |     |             |
| UNSB01.fasta                                                                                                                                       | Cele-UNSB01_2:15454990 | 2 | 15454990 | 15455468 | 479  | 9   | 35  | TTGCCGGAAT  |
| TTGCCAGAATTGAAAAATTTCTGGCAAACCGCCAAA                                                                                                               |                        |   |          |          |      |     |     |             |
| UNSB01.fasta                                                                                                                                       | Cele-UNSB01_2:15522229 | 2 | 15522229 | 15522469 | 241  | 12  | 23  | GCTACAGTAC  |
| GCTACAGTACCCAGCTTGACTT                                                                                                                             |                        |   |          |          |      |     |     |             |
| UNSB01.fasta                                                                                                                                       | Cele-UNSB01_2:15522855 | 2 | 15522855 | 15525136 | 2282 | 188 | 12  | TTAGGCTTAG  |
| TTAGGCTTAGGC                                                                                                                                       |                        |   |          |          |      |     |     |             |
| UNSB01.fasta                                                                                                                                       | Cele-UNSB01_3:11       | 3 | 11       | 3196     | 3186 | 261 | 12  | TAAGCCTAAG  |
| TAAGCCTAAGCC                                                                                                                                       |                        |   |          |          |      |     |     |             |
| UNSB01.fasta                                                                                                                                       | Cele-UNSB01_3:81693    | 3 | 81693    | 82933    | 1241 | 39  | 31  | TAAATAATTA  |
| TAAATAATTAGCAGACAAACGTTGGGTCTGC                                                                                                                    |                        |   |          |          |      |     |     |             |
| UNSB01.fasta                                                                                                                                       | Cele-UNSB01_3:83964    | 3 | 83964    | 84341    | 378  | 14  | 21  | AAATTTGGCT  |
| AAATTTGGCTTAAATGTTGA                                                                                                                               |                        |   |          |          |      |     |     |             |
| UNSB01.fasta                                                                                                                                       | Cele-UNSB01_3:86662    | 3 | 86662    | 86935    | 274  | 13  | 21  | CCATTTTAAG  |
| CCATTTTAAGCCAATTTTGGA                                                                                                                              |                        |   |          |          |      |     |     |             |
| UNSB01.fasta                                                                                                                                       | Cele-UNSB01_3:86662    | 3 | 86662    | 87180    | 519  | 25  | 21  | CCATTTTAAG  |
| CCATTTTAAGCCAATTTTGGA                                                                                                                              |                        |   |          |          |      |     |     |             |
| UNSB01.fasta                                                                                                                                       | Cele-UNSB01_3:88388    | 3 | 88388    | 88698    | 311  | 9   | 31  | TGCTAAATAA  |
| TGCTAAATAATTAGCAGACCATTTTGGGTA                                                                                                                     |                        |   |          |          |      |     |     |             |
| UNSB01.fasta                                                                                                                                       | Cele-UNSB01_3:119691   | 3 | 119691   | 119763   | 73   | 5   | 12  | GCCTAAGCCT  |
| GCCTAAGCCTAA                                                                                                                                       |                        |   |          |          |      |     |     |             |
| UNSB01.fasta                                                                                                                                       | Cele-UNSB01_3:134796   | 3 | 134796   | 135400   | 605  | 7   | 34  | AATTCGGCA   |
| AATTCGGCAATTTACCAATTTGCCAGAAATTC                                                                                                                   |                        |   |          |          |      |     |     |             |
| UNSB01.fasta                                                                                                                                       | Cele-UNSB01_3:192738   | 3 | 192738   | 193322   | 585  | 4   | 31  | TTAGCAGACC  |
| TTAGCAGACCAAGTATGGTCTGCTAATTAT                                                                                                                     |                        |   |          |          |      |     |     |             |
| UNSB01.fasta                                                                                                                                       | Cele-UNSB01_3:194647   | 3 | 194647   | 195253   | 607  | 5   | 31  | TTAGCAGACC  |
| TTAGCAGACCAAGTATGGTCTGCTAAATAA                                                                                                                     |                        |   |          |          |      |     |     |             |
| UNSB01.fasta                                                                                                                                       | Cele-UNSB01_3:196367   | 3 | 196367   | 196735   | 369  | 7   | 31  | GGTCTGCTAA  |
| GGTCTGCTAAATATTTAGCATACCCAATTT                                                                                                                     |                        |   |          |          |      |     |     |             |
| UNSB01.fasta                                                                                                                                       | Cele-UNSB01_3:198288   | 3 | 198288   | 198567   | 280  | 9   | 31  | ACCCAAGTAT  |
| ACCCAAGTATGGTCTGCTAATTATTTAGCAA                                                                                                                    |                        |   |          |          |      |     |     |             |

|                                                                                                                                                    |                      |   |        |        |       |    |     |             |
|----------------------------------------------------------------------------------------------------------------------------------------------------|----------------------|---|--------|--------|-------|----|-----|-------------|
| UNSB01.fasta                                                                                                                                       | Cele-UNSB01_3:211856 | 3 | 211856 | 211976 | 121   | 7  | 16  | TAGGCATCTA  |
| TAGGCATCTAGGCAGG                                                                                                                                   |                      |   |        |        |       |    |     |             |
| UNSB01.fasta                                                                                                                                       | Cele-UNSB01_3:214401 | 3 | 214401 | 214633 | 233   | 8  | 12  | AAGCCTAAGC  |
| AAGACTAAGCCT                                                                                                                                       |                      |   |        |        |       |    |     |             |
| UNSB01.fasta                                                                                                                                       | Cele-UNSB01_3:249570 | 3 | 249570 | 249725 | 156   | 4  | 31  | AGCTCAAAAT  |
| AGCTCAAAATCTGTAAAAATGCCCATTTTGT                                                                                                                    |                      |   |        |        |       |    |     |             |
| UNSB01.fasta                                                                                                                                       | Cele-UNSB01_3:260141 | 3 | 260141 | 260567 | 427   | 12 | 30  | TTTTTTGAGC  |
| TGTTTTGAGCCAAAAATTCAAAAATCTCG                                                                                                                      |                      |   |        |        |       |    |     |             |
| UNSB01.fasta                                                                                                                                       | Cele-UNSB01_3:265034 | 3 | 265034 | 265468 | 435   | 11 | 11  | CCTACAGTAC  |
| CCTACAGTACA                                                                                                                                        |                      |   |        |        |       |    |     |             |
| UNSB01.fasta                                                                                                                                       | Cele-UNSB01_3:272176 | 3 | 272176 | 273482 | 1307  | 13 | 101 | GGTTACTGTGA |
| GGTTACTGTAGTTCCAAAAGTACGCAAACTGACTACGGTTCCTAATACATCAGATATTACGACAAAGTGCAGAAAATCGCTAAAAATGACTTTACTGG                                                 |                      |   |        |        |       |    |     |             |
| UNSB01.fasta                                                                                                                                       | Cele-UNSB01_3:344303 | 3 | 344303 | 344830 | 528   | 17 | 31  | TGGTCTGCTA  |
| TGGTCTGCTAAATTTTAGCAGACCCAAACAT                                                                                                                    |                      |   |        |        |       |    |     |             |
| UNSB01.fasta                                                                                                                                       | Cele-UNSB01_3:347263 | 3 | 347263 | 347821 | 559   | 17 | 31  | TATGCTAAAT  |
| TATGCTAAATATTTAGCAGACCAAAAATAGG                                                                                                                    |                      |   |        |        |       |    |     |             |
| UNSB01.fasta                                                                                                                                       | Cele-UNSB01_3:350896 | 3 | 350896 | 352295 | 1400  | 23 | 31  | TTAGCAGACC  |
| TTAGCAGACCCAAAGTAGGTATGCTAAATAT                                                                                                                    |                      |   |        |        |       |    |     |             |
| UNSB01.fasta                                                                                                                                       | Cele-UNSB01_3:355335 | 3 | 355335 | 355552 | 218   | 7  | 31  | CTGCTAAATA  |
| CTGCTAAATATTTAGCAGACCAACTTTGGGT                                                                                                                    |                      |   |        |        |       |    |     |             |
| UNSB01.fasta                                                                                                                                       | Cele-UNSB01_3:356762 | 3 | 356762 | 357146 | 385   | 13 | 31  | TTAGCAGACC  |
| TTAGCAGACCCAAAGTTGGGTATGCTAAATAT                                                                                                                   |                      |   |        |        |       |    |     |             |
| UNSB01.fasta                                                                                                                                       | Cele-UNSB01_3:415402 | 3 | 415402 | 416126 | 725   | 7  | 40  | TCCACGTGGA  |
| TCTACGTGGAATTTTCAGAATTTTCTCAGAAATTTTGATT                                                                                                           |                      |   |        |        |       |    |     |             |
| UNSB01.fasta                                                                                                                                       | Cele-UNSB01_3:421701 | 3 | 421701 | 421887 | 187   | 6  | 31  | TTGGGTCTGC  |
| TTGGGTCTGCTAAATAATTAGCAGACCATAA                                                                                                                    |                      |   |        |        |       |    |     |             |
| UNSB01.fasta                                                                                                                                       | Cele-UNSB01_3:437143 | 3 | 437143 | 437747 | 605   | 6  | 31  | TATTTAGCAG  |
| TATTTAGCAGACCCAATTATGGTCTGCTAAT                                                                                                                    |                      |   |        |        |       |    |     |             |
| UNSB01.fasta                                                                                                                                       | Cele-UNSB01_3:438816 | 3 | 438816 | 440336 | 1521  | 38 | 40  | TAGAAAGTTC  |
| TAGAAAGTTCTGGAACATTCCAGAAATTCCCGATTTTTC                                                                                                            |                      |   |        |        |       |    |     |             |
| UNSB01.fasta                                                                                                                                       | Cele-UNSB01_3:438790 | 3 | 438790 | 441355 | 2566  | 43 | 40  | ACATTCCAGA  |
| ACATTCCAGAATTTTCTCGATTTTCTAGAAAGTTCTGGA                                                                                                            |                      |   |        |        |       |    |     |             |
| UNSB01.fasta                                                                                                                                       | Cele-UNSB01_3:441483 | 3 | 441483 | 441987 | 505   | 18 | 11  | CTACAGTACT  |
| CTACAGTACTA                                                                                                                                        |                      |   |        |        |       |    |     |             |
| UNSB01.fasta                                                                                                                                       | Cele-UNSB01_3:464201 | 3 | 464201 | 477164 | 12964 | 79 | 164 | ATATAATGCT  |
| ATATAATGCTCGTAATTATTAATAAATGTGTGTGTCTCAGAGCCACGTCTGAAAATACAGATTTTTTCTCGAAAATTTCAAAACTTTGTAGAAATTCGATTTTGACATAAATGATCGCTCTTTTTTCTGACATGTATTTTCAGTGA |                      |   |        |        |       |    |     |             |
| CAACTAAACTAGAAA                                                                                                                                    |                      |   |        |        |       |    |     |             |
| UNSB01.fasta                                                                                                                                       | Cele-UNSB01_3:495426 | 3 | 495426 | 496459 | 1034  | 16 | 31  | TTTAGCAGAC  |
| TTTAGCAGACCAAAGTTGGGTATGCTAAATA                                                                                                                    |                      |   |        |        |       |    |     |             |
| UNSB01.fasta                                                                                                                                       | Cele-UNSB01_3:503013 | 3 | 503013 | 503261 | 249   | 8  | 31  | TTGGGTATGC  |
| TTGGGTATGCTAAATATTTAGCAGACCAAAG                                                                                                                    |                      |   |        |        |       |    |     |             |
| UNSB01.fasta                                                                                                                                       | Cele-UNSB01_3:506857 | 3 | 506857 | 507105 | 249   | 8  | 31  | GTATGCTAAA  |
| GTATGCTAAATATTTAGCAGACCAAAGTTGG                                                                                                                    |                      |   |        |        |       |    |     |             |
| UNSB01.fasta                                                                                                                                       | Cele-UNSB01_3:516006 | 3 | 516006 | 516440 | 435   | 14 | 31  | GGTCTGCTAA  |
| GGTCTGCTAAATATTTAGCATACCCAACCTT                                                                                                                    |                      |   |        |        |       |    |     |             |
| UNSB01.fasta                                                                                                                                       | Cele-UNSB01_3:517798 | 3 | 517798 | 519152 | 1355  | 34 | 31  | TTAGCAGACC  |
| TTAGCAGACCAAAGATAGGTATGCTAAATAC                                                                                                                    |                      |   |        |        |       |    |     |             |
| UNSB01.fasta                                                                                                                                       | Cele-UNSB01_3:523916 | 3 | 523916 | 525062 | 1147  | 37 | 31  | GGTCTGCTAA  |
| GGTCTGCTAATTATTCAGCATACCCAAATTT                                                                                                                    |                      |   |        |        |       |    |     |             |
| UNSB01.fasta                                                                                                                                       | Cele-UNSB01_3:546017 | 3 | 546017 | 546152 | 136   | 6  | 11  | CTACAGTACC  |
| CTACAGTAACC                                                                                                                                        |                      |   |        |        |       |    |     |             |
| UNSB01.fasta                                                                                                                                       | Cele-UNSB01_3:611245 | 3 | 611245 | 611586 | 342   | 11 | 31  | GGTCTGCTAA  |
| GGTCTGCTAATTATTTAGCATACCGAACTTC                                                                                                                    |                      |   |        |        |       |    |     |             |
| UNSB01.fasta                                                                                                                                       | Cele-UNSB01_3:614340 | 3 | 614340 | 614495 | 156   | 5  | 31  | TGGGTATGCT  |
| TGGGTATGCTAAATAATTAGCAGACCAAAGT                                                                                                                    |                      |   |        |        |       |    |     |             |
| UNSB01.fasta                                                                                                                                       | Cele-UNSB01_3:660202 | 3 | 660202 | 660394 | 193   | 6  | 31  | TTAGCAGACC  |
| TTAGCAGACTCATGGTAGGTATGCTAAATAT                                                                                                                    |                      |   |        |        |       |    |     |             |
| UNSB01.fasta                                                                                                                                       | Cele-UNSB01_3:662174 | 3 | 662174 | 662284 | 111   | 6  | 18  | TAGGCTTAGG  |
| TAGTCTTAGGCTAACCTT                                                                                                                                 |                      |   |        |        |       |    |     |             |

|                                                                                             |                       |   |         |         |       |     |    |             |
|---------------------------------------------------------------------------------------------|-----------------------|---|---------|---------|-------|-----|----|-------------|
| UNSB01.fasta                                                                                | Cele-UNSB01_3:665955  | 3 | 665955  | 666358  | 404   | 13  | 31 | TGGGTCTGCT  |
| TGGGTCTGCTAAATATTTAGCAGACCAACTA                                                             |                       |   |         |         |       |     |    |             |
| UNSB01.fasta                                                                                | Cele-UNSB01_3:727287  | 3 | 727287  | 727380  | 94    | 5   | 15 | GGGGGCAACA  |
| GGGGGCAACAAATTA                                                                             |                       |   |         |         |       |     |    |             |
| UNSB01.fasta                                                                                | Cele-UNSB01_3:731921  | 3 | 731921  | 732069  | 149   | 8   | 15 | TGTTGCCCCC  |
| TGTTGACCCCTATTA                                                                             |                       |   |         |         |       |     |    |             |
| UNSB01.fasta                                                                                | Cele-UNSB01_3:882434  | 3 | 882434  | 882682  | 249   | 7   | 31 | TAAATATTTA  |
| TAAATATTTAGTAGACCAAAGTTGGGTATGC                                                             |                       |   |         |         |       |     |    |             |
| UNSB01.fasta                                                                                | Cele-UNSB01_3:949283  | 3 | 949283  | 949630  | 348   | 8   | 18 | TGCAAGACTA  |
| TGCAAGACTATTAGAAGC                                                                          |                       |   |         |         |       |     |    |             |
| UNSB01.fasta                                                                                | Cele-UNSB01_3:949715  | 3 | 949715  | 950024  | 310   | 5   | 18 | TAGTGCTGCA  |
| TAGTGCTGCAGTCTCTAT                                                                          |                       |   |         |         |       |     |    |             |
| UNSB01.fasta                                                                                | Cele-UNSB01_3:958005  | 3 | 958005  | 958109  | 105   | 4   | 26 | CGGCCAGAGT  |
| CGGCCAGAGTCACTATATTTGGTGAA                                                                  |                       |   |         |         |       |     |    |             |
| UNSB01.fasta                                                                                | Cele-UNSB01_3:958146  | 3 | 958146  | 965823  | 7678  | 284 | 27 | AGAGAGTAAA  |
| AGAGAGTAAAAATATAGTGGGAAGCCAC                                                                |                       |   |         |         |       |     |    |             |
| UNSB01.fasta                                                                                | Cele-UNSB01_3:958162  | 3 | 958162  | 973687  | 15526 | 569 | 27 | TGGGAAGCCA  |
| TGGGAAGCCACAGAGAGTAAATATAG                                                                  |                       |   |         |         |       |     |    |             |
| UNSB01.fasta                                                                                | Cele-UNSB01_3:1041359 | 3 | 1041359 | 1041618 | 260   | 12  | 22 | TAAATCTACA  |
| TAAATCTACACACTTGGCCTCG                                                                      |                       |   |         |         |       |     |    |             |
| UNSB01.fasta                                                                                | Cele-UNSB01_3:1053032 | 3 | 1053032 | 1053110 | 79    | 5   | 16 | TTATAGTGTT  |
| TTATAGTGTTATAGTG                                                                            |                       |   |         |         |       |     |    |             |
| UNSB01.fasta                                                                                | Cele-UNSB01_3:1059346 | 3 | 1059346 | 1075750 | 16405 | 279 | 59 | AACTGAGAAT  |
| AACTGAGAATATGAGAAATATGGAAATTCATGTGTGCACCTGGTTTTCAAATTTTTTA                                  |                       |   |         |         |       |     |    |             |
| UNSB01.fasta                                                                                | Cele-UNSB01_3:1107553 | 3 | 1107553 | 1107733 | 181   | 10  | 12 | AAGCCTAAGC  |
| AAGCCTAAGCCT                                                                                |                       |   |         |         |       |     |    |             |
| UNSB01.fasta                                                                                | Cele-UNSB01_3:1112086 | 3 | 1112086 | 1112814 | 729   | 14  | 40 | AAAAATCCACG |
| AAAATCCACGTAGATTATCGATTTTTCATAGATTTTGCA                                                     |                       |   |         |         |       |     |    |             |
| UNSB01.fasta                                                                                | Cele-UNSB01_3:1112079 | 3 | 1112079 | 1113479 | 1401  | 16  | 40 | TTTTTGCAAAA |
| TTTTGCAAAAATCCACGTAGATTATCGATTTTTCATAGAA                                                    |                       |   |         |         |       |     |    |             |
| UNSB01.fasta                                                                                | Cele-UNSB01_3:1175770 | 3 | 1175770 | 1176177 | 408   | 4   | 96 | GAGGGCCGCA  |
| GAGGGCCGAGGCCCGAACACTCTTGAAACTATGGGCTGGCTTTGATCCTATTCTAAGCAGATATGTTATTTCAAGCCTAATAACCAGGTTT |                       |   |         |         |       |     |    |             |
| UNSB01.fasta                                                                                | Cele-UNSB01_3:1204553 | 3 | 1204553 | 1205580 | 1028  | 13  | 35 | TTTAAATTT   |
| TTGAAATTTTCGGGCAAATTGGCAACTTGCCGGAT                                                         |                       |   |         |         |       |     |    |             |
| UNSB01.fasta                                                                                | Cele-UNSB01_3:1210986 | 3 | 1210986 | 1211328 | 343   | 4   | 21 | ACTACAGTAC  |
| ACTACAGTACCCCCACTACC                                                                        |                       |   |         |         |       |     |    |             |
| UNSB01.fasta                                                                                | Cele-UNSB01_3:1301641 | 3 | 1301641 | 1302992 | 1352  | 116 | 11 | TTTTTGCACA  |
| TTTTTGCACAA                                                                                 |                       |   |         |         |       |     |    |             |
| UNSB01.fasta                                                                                | Cele-UNSB01_3:1307999 | 3 | 1307999 | 1309276 | 1278  | 65  | 20 | AAAAATAGAT  |
| AAAAATAAATTGGCAGACGA                                                                        |                       |   |         |         |       |     |    |             |
| UNSB01.fasta                                                                                | Cele-UNSB01_3:1312329 | 3 | 1312329 | 1312425 | 97    | 5   | 12 | AGGCTTAGGC  |
| AGGCTTAGGCTT                                                                                |                       |   |         |         |       |     |    |             |
| UNSB01.fasta                                                                                | Cele-UNSB01_3:1320709 | 3 | 1320709 | 1320805 | 97    | 5   | 12 | AGGCTTAGGC  |
| AGGCTTAGGCTT                                                                                |                       |   |         |         |       |     |    |             |
| UNSB01.fasta                                                                                | Cele-UNSB01_3:1329089 | 3 | 1329089 | 1329185 | 97    | 5   | 12 | AGGCTTAGGC  |
| AGGCTTAGGCTT                                                                                |                       |   |         |         |       |     |    |             |
| UNSB01.fasta                                                                                | Cele-UNSB01_3:1364177 | 3 | 1364177 | 1382615 | 18439 | 734 | 25 | CAGAGAGTAA  |
| CAGAGAGTAAATAATTGGTGAAGC                                                                    |                       |   |         |         |       |     |    |             |
| UNSB01.fasta                                                                                | Cele-UNSB01_3:1391886 | 3 | 1391886 | 1392275 | 390   | 16  | 21 | TTTTTGGTAA  |
| TTTTTGGTAAATTTGATAAT                                                                        |                       |   |         |         |       |     |    |             |
| UNSB01.fasta                                                                                | Cele-UNSB01_3:1394199 | 3 | 1394199 | 1394513 | 315   | 12  | 21 | CAAAAAGTTA  |
| CAAAAAGTTATCAAATTTTAC                                                                       |                       |   |         |         |       |     |    |             |
| UNSB01.fasta                                                                                | Cele-UNSB01_3:1395088 | 3 | 1395088 | 1395322 | 235   | 5   | 35 | CAAATCGGCA  |
| CAAATCGACAAATTGCCGGAATTGAAAATTTCCGG                                                         |                       |   |         |         |       |     |    |             |
| UNSB01.fasta                                                                                | Cele-UNSB01_3:1399964 | 3 | 1399964 | 1400110 | 147   | 5   | 11 | GTACTGTAGG  |
| GTACTGTAGGA                                                                                 |                       |   |         |         |       |     |    |             |
| UNSB01.fasta                                                                                | Cele-UNSB01_3:1400275 | 3 | 1400275 | 1400335 | 61    | 4   | 15 | TCGTGGTGAG  |
| TCGTGGTGAGACCCA                                                                             |                       |   |         |         |       |     |    |             |

|                                                                                                                                                   |                       |   |         |         |       |     |     |             |
|---------------------------------------------------------------------------------------------------------------------------------------------------|-----------------------|---|---------|---------|-------|-----|-----|-------------|
| UNSB01.fasta                                                                                                                                      | Cele-UNSB01_3:1400394 | 3 | 1400394 | 1400521 | 128   | 4   | 31  | AATTCAAATT  |
| AATTCAAATTTCTTCAAAAAATTTTGGCGGG                                                                                                                   |                       |   |         |         |       |     |     |             |
| UNSB01.fasta                                                                                                                                      | Cele-UNSB01_3:1406406 | 3 | 1406406 | 1406896 | 491   | 33  | 11  | GGTACTGTAG  |
| GGTGTCTGTAGG                                                                                                                                      |                       |   |         |         |       |     |     |             |
| UNSB01.fasta                                                                                                                                      | Cele-UNSB01_3:1413910 | 3 | 1413910 | 1414798 | 889   | 40  | 14  | ATACCTAATA  |
| ATACCTTATACCTT                                                                                                                                    |                       |   |         |         |       |     |     |             |
| UNSB01.fasta                                                                                                                                      | Cele-UNSB01_3:1466668 | 3 | 1466668 | 1467327 | 660   | 5   | 43  | GGCTCTCGGC  |
| GGCTCTCGGCTCGCGCCGAGAGCCGAGCTCTATTTTCCGGTTC                                                                                                       |                       |   |         |         |       |     |     |             |
| UNSB01.fasta                                                                                                                                      | Cele-UNSB01_3:1616576 | 3 | 1616576 | 1616906 | 331   | 16  | 20  | CATAAAAAATT |
| CATAAAAAATTCAGAAAAATG                                                                                                                             |                       |   |         |         |       |     |     |             |
| UNSB01.fasta                                                                                                                                      | Cele-UNSB01_3:1617648 | 3 | 1617648 | 1618407 | 760   | 37  | 20  | TTTCACTAAA  |
| TTTCACTAAAATTTCAAAT                                                                                                                               |                       |   |         |         |       |     |     |             |
| UNSB01.fasta                                                                                                                                      | Cele-UNSB01_3:1642030 | 3 | 1642030 | 1642586 | 557   | 7   | 21  | CCTAAAAATT  |
| CCTAAAAATTCCAAATTTTAA                                                                                                                             |                       |   |         |         |       |     |     |             |
| UNSB01.fasta                                                                                                                                      | Cele-UNSB01_3:1690415 | 3 | 1690415 | 1691093 | 679   | 5   | 72  | ATGAATTTTA  |
| ATGAATTTTAAATACATTTTCCTGACGATAAAGTCATAAAACTCATTTTTTGACCTTTCAACTTTAGTTTT                                                                           |                       |   |         |         |       |     |     |             |
| UNSB01.fasta                                                                                                                                      | Cele-UNSB01_3:1715361 | 3 | 1715361 | 1716220 | 860   | 41  | 11  | TACTGTAGGG  |
| TACTGTAGAGG                                                                                                                                       |                       |   |         |         |       |     |     |             |
| UNSB01.fasta                                                                                                                                      | Cele-UNSB01_3:1724995 | 3 | 1724995 | 1725361 | 367   | 4   | 92  | CTGCGGAACC  |
| CTGCGGAACCCGAACGTGTCGGCGCTTCCAAAAACAACCCTCTTCACACTTCATTGCGCACACACCAAACCTACTAGTTTCAGTCAAA                                                          |                       |   |         |         |       |     |     |             |
| UNSB01.fasta                                                                                                                                      | Cele-UNSB01_3:1738456 | 3 | 1738456 | 1739086 | 631   | 52  | 12  | TGAGCCTGAG  |
| TGAGCCTGAGCC                                                                                                                                      |                       |   |         |         |       |     |     |             |
| UNSB01.fasta                                                                                                                                      | Cele-UNSB01_3:1753459 | 3 | 1753459 | 1753580 | 122   | 11  | 11  | GCAAAAAATG  |
| GCAAAAAATGT                                                                                                                                       |                       |   |         |         |       |     |     |             |
| UNSB01.fasta                                                                                                                                      | Cele-UNSB01_3:1796051 | 3 | 1796051 | 1796519 | 469   | 35  | 12  | CTAAGCCTAA  |
| CTAAGCCTGAGC                                                                                                                                      |                       |   |         |         |       |     |     |             |
| UNSB01.fasta                                                                                                                                      | Cele-UNSB01_3:1833347 | 3 | 1833347 | 1833868 | 522   | 14  | 34  | AATTGAAATT  |
| AATTGAAATTTCCGGTAAATCGGAAAAATGCGCGG                                                                                                               |                       |   |         |         |       |     |     |             |
| UNSB01.fasta                                                                                                                                      | Cele-UNSB01_3:1843958 | 3 | 1843958 | 1844048 | 91    | 6   | 12  | AGGCTTAGGC  |
| AGGCTGAGGCTT                                                                                                                                      |                       |   |         |         |       |     |     |             |
| UNSB01.fasta                                                                                                                                      | Cele-UNSB01_3:1887376 | 3 | 1887376 | 1889731 | 2356  | 56  | 19  | AAAATCGATA  |
| AAAATCAATATTTTATCGG                                                                                                                               |                       |   |         |         |       |     |     |             |
| UNSB01.fasta                                                                                                                                      | Cele-UNSB01_3:1891974 | 3 | 1891974 | 1892414 | 441   | 36  | 11  | ATTTTTTGCA  |
| ATTTTTTGTAAC                                                                                                                                      |                       |   |         |         |       |     |     |             |
| UNSB01.fasta                                                                                                                                      | Cele-UNSB01_3:1974698 | 3 | 1974698 | 1975558 | 861   | 44  | 19  | AAAATCGATA  |
| AAAATCGATAATTCCTCAA                                                                                                                               |                       |   |         |         |       |     |     |             |
| UNSB01.fasta                                                                                                                                      | Cele-UNSB01_3:2017089 | 3 | 2017089 | 2018496 | 1408  | 57  | 21  | TGGAAATTTT  |
| TGGAAATTTTACCCAAAAAT                                                                                                                              |                       |   |         |         |       |     |     |             |
| UNSB01.fasta                                                                                                                                      | Cele-UNSB01_3:2046603 | 3 | 2046603 | 2047209 | 607   | 30  | 12  | TAGGCTTAGG  |
| TAGGCTTAGGCT                                                                                                                                      |                       |   |         |         |       |     |     |             |
| UNSB01.fasta                                                                                                                                      | Cele-UNSB01_3:2058475 | 3 | 2058475 | 2058618 | 144   | 11  | 11  | GTCGCGTTGC  |
| GTCGCGTTGCG                                                                                                                                       |                       |   |         |         |       |     |     |             |
| UNSB01.fasta                                                                                                                                      | Cele-UNSB01_3:2068206 | 3 | 2068206 | 2068691 | 486   | 44  | 11  | TGTGCAAAAA  |
| TGTGCAAAAAA                                                                                                                                       |                       |   |         |         |       |     |     |             |
| UNSB01.fasta                                                                                                                                      | Cele-UNSB01_3:2092267 | 3 | 2092267 | 2093197 | 931   | 27  | 31  | TGCGTCGGAA  |
| TGCGTCGGAAATGCATTCTTATCATCAGCGG                                                                                                                   |                       |   |         |         |       |     |     |             |
| UNSB01.fasta                                                                                                                                      | Cele-UNSB01_3:2094174 | 3 | 2094174 | 2094918 | 745   | 17  | 31  | TCCGATGCAT  |
| TCCGATGCATTGGAAATGATCGGAAAAATGGT                                                                                                                  |                       |   |         |         |       |     |     |             |
| UNSB01.fasta                                                                                                                                      | Cele-UNSB01_3:2095462 | 3 | 2095462 | 2096950 | 1489  | 36  | 19  | TATCGATTTT  |
| TATTGATTTTTTGCTAAAA                                                                                                                               |                       |   |         |         |       |     |     |             |
| UNSB01.fasta                                                                                                                                      | Cele-UNSB01_3:2118334 | 3 | 2118334 | 2118593 | 260   | 20  | 11  | CTACAGTACC  |
| CTACAGTACTT                                                                                                                                       |                       |   |         |         |       |     |     |             |
| UNSB01.fasta                                                                                                                                      | Cele-UNSB01_3:2118949 | 3 | 2118949 | 2119137 | 189   | 9   | 20  | TGTAGATTTA  |
| TGTGGATTTACAGGAATCTA                                                                                                                              |                       |   |         |         |       |     |     |             |
| UNSB01.fasta                                                                                                                                      | Cele-UNSB01_3:2149341 | 3 | 2149341 | 2150059 | 719   | 12  | 35  | TTTGCCGGAA  |
| TTTGCCGGAAATTTTCAATTCGACAATTTGCCGA                                                                                                                |                       |   |         |         |       |     |     |             |
| UNSB01.fasta                                                                                                                                      | Cele-UNSB01_3:2160246 | 3 | 2160246 | 2184061 | 23816 | 142 | 168 | TTTATTTTTG  |
| TTTATTTTTGTTTTTTTGTGCCTACATATACCTGTTGAAATTGGAATTCAAGACAAAAACCCCTGTAGCGCTCTGAAATGGATATCTAGGTACAAAACTTACCAATAATATTTTAAAAAATCTAGAATCCAAATCTATCAAAACA |                       |   |         |         |       |     |     |             |
| TTTCCGGAATTCATAATG                                                                                                                                |                       |   |         |         |       |     |     |             |

|                                                                                                                                                           |                       |   |         |         |       |     |     |              |
|-----------------------------------------------------------------------------------------------------------------------------------------------------------|-----------------------|---|---------|---------|-------|-----|-----|--------------|
| UNSB01.fasta                                                                                                                                              | Cele-UNSB01_3:2204608 | 3 | 2204608 | 2205196 | 589   | 25  | 21  | GCCTAAAAAC   |
| GCATAAAACGTAAATTTTAG                                                                                                                                      |                       |   |         |         |       |     |     |              |
| UNSB01.fasta                                                                                                                                              | Cele-UNSB01_3:2212231 | 3 | 2212231 | 2213000 | 770   | 22  | 31  | ATTTCCCGCC   |
| ATTTCGCCCAAAAATATTTGAAAAC TTGA                                                                                                                            |                       |   |         |         |       |     |     |              |
| UNSB01.fasta                                                                                                                                              | Cele-UNSB01_3:2214780 | 3 | 2214780 | 2216279 | 1500  | 39  | 39  | TTTTTGGCGG   |
| TTTTTGGCGGGAAATTTCAA AATTCAAATTTTGAATAT                                                                                                                   |                       |   |         |         |       |     |     |              |
| UNSB01.fasta                                                                                                                                              | Cele-UNSB01_3:2219970 | 3 | 2219970 | 2221469 | 1500  | 39  | 39  | TTTTTGGCGG   |
| TTTTTGGCGGGAAATTTCAA AATTCAAATTTTGAATAT                                                                                                                   |                       |   |         |         |       |     |     |              |
| UNSB01.fasta                                                                                                                                              | Cele-UNSB01_3:2223808 | 3 | 2223808 | 2223967 | 160   | 4   | 40  | TCCCCC AAAA  |
| TCCCCC AAAA AATATTCAA A AATTTGAATTTTGAAATT                                                                                                                |                       |   |         |         |       |     |     |              |
| UNSB01.fasta                                                                                                                                              | Cele-UNSB01_3:2325106 | 3 | 2325106 | 2325938 | 833   | 23  | 32  | CTCAGCCAAT   |
| CTCAGCCAATCAGCAATTAGCTCTGCCTATTT                                                                                                                          |                       |   |         |         |       |     |     |              |
| UNSB01.fasta                                                                                                                                              | Cele-UNSB01_3:2342333 | 3 | 2342333 | 2342437 | 105   | 5   | 21  | CTGACCAAAT   |
| CTGACCAAATTTGTTTTAGCA                                                                                                                                     |                       |   |         |         |       |     |     |              |
| UNSB01.fasta                                                                                                                                              | Cele-UNSB01_3:2351961 | 3 | 2351961 | 2352192 | 232   | 9   | 21  | GTCAGTGTCTG  |
| GTCAGTGTCTGTAACACATTTT                                                                                                                                    |                       |   |         |         |       |     |     |              |
| UNSB01.fasta                                                                                                                                              | Cele-UNSB01_3:2562874 | 3 | 2562874 | 2563954 | 1081  | 40  | 10  | AGGCAGGCTT   |
| AGGCAGGCAT                                                                                                                                                |                       |   |         |         |       |     |     |              |
| UNSB01.fasta                                                                                                                                              | Cele-UNSB01_3:2564180 | 3 | 2564180 | 2564252 | 73    | 5   | 12  | CCAAGCCCAA   |
| CCAAGCCCAATC                                                                                                                                              |                       |   |         |         |       |     |     |              |
| UNSB01.fasta                                                                                                                                              | Cele-UNSB01_3:2578277 | 3 | 2578277 | 2578816 | 540   | 27  | 20  | GACCAGCCT    |
| GACCCAGCCTACCCCAGGCA                                                                                                                                      |                       |   |         |         |       |     |     |              |
| UNSB01.fasta                                                                                                                                              | Cele-UNSB01_3:2578282 | 3 | 2578282 | 2579101 | 820   | 41  | 20  | AGCCTACCCC   |
| AGCCTACCCCAGGCAGACCC                                                                                                                                      |                       |   |         |         |       |     |     |              |
| UNSB01.fasta                                                                                                                                              | Cele-UNSB01_3:2604301 | 3 | 2604301 | 2604569 | 269   | 6   | 45  | TCTGATCCTT   |
| TCTGATCCTTCCGATCCGAAGGATCACATGGGTACCTCCTGATGG                                                                                                             |                       |   |         |         |       |     |     |              |
| UNSB01.fasta                                                                                                                                              | Cele-UNSB01_3:2604631 | 3 | 2604631 | 2620875 | 16245 | 650 | 25  | AGAGAGTAAA   |
| AGAGAGTAAAAATATATGGTGAAGCC                                                                                                                                |                       |   |         |         |       |     |     |              |
| UNSB01.fasta                                                                                                                                              | Cele-UNSB01_3:2620888 | 3 | 2620888 | 2621068 | 181   | 5   | 40  | TTCCAGAATT   |
| TTCCAGAATTTTCTCGATTTTCTAGAAAGTTCTGGAACA                                                                                                                   |                       |   |         |         |       |     |     |              |
| UNSB01.fasta                                                                                                                                              | Cele-UNSB01_3:2621291 | 3 | 2621291 | 2621771 | 481   | 29  | 15  | GGTCTCACCA   |
| GGTCTCACACGATG                                                                                                                                            |                       |   |         |         |       |     |     |              |
| UNSB01.fasta                                                                                                                                              | Cele-UNSB01_3:2665588 | 3 | 2665588 | 2665980 | 393   | 11  | 35  | TTTGCCGGAA   |
| TTTGCTGGAAATGTTCAATTGCGGCAAATTGCCGA                                                                                                                       |                       |   |         |         |       |     |     |              |
| UNSB01.fasta                                                                                                                                              | Cele-UNSB01_3:2911307 | 3 | 2911307 | 2911655 | 349   | 10  | 35  | TTTGCCGGAA   |
| TTTGCCGGAAATTTTAA TTTCTGGCAATTGCCGA                                                                                                                       |                       |   |         |         |       |     |     |              |
| UNSB01.fasta                                                                                                                                              | Cele-UNSB01_3:2955858 | 3 | 2955858 | 2957390 | 1533  | 44  | 19  | AAAA TC GATA |
| AAAA TTGATAATTTCCGGA                                                                                                                                      |                       |   |         |         |       |     |     |              |
| UNSB01.fasta                                                                                                                                              | Cele-UNSB01_3:3099001 | 3 | 3099001 | 3099720 | 720   | 4   | 180 | TGTCGGCCGC   |
| TGTCGGCCGCTGTATCTTTTGCCTCAATTTTTTTTAAATTTTCAA ACATACATATTC CATTAGGTAACATTATGAGCTACAGTTTGT TAGTTGGAATTTTATTTCTAAA ATTACTAGTTTCTGAGTTATACTCATTTCAATATCCCCCA |                       |   |         |         |       |     |     |              |
| AGTGAAATCGCTAAAAATGAACTCGCGAGG                                                                                                                            |                       |   |         |         |       |     |     |              |
| UNSB01.fasta                                                                                                                                              | Cele-UNSB01_3:3140206 | 3 | 3140206 | 3140936 | 731   | 5   | 16  | TGTATATATA   |
| TGTATATATATATA                                                                                                                                            |                       |   |         |         |       |     |     |              |
| UNSB01.fasta                                                                                                                                              | Cele-UNSB01_3:3145893 | 3 | 3145893 | 3146730 | 838   | 18  | 37  | ATTTTGGCGG   |
| ATTTTGGCGGGATTTCAA TTTGAATTTTTTGAAAAAT                                                                                                                    |                       |   |         |         |       |     |     |              |
| UNSB01.fasta                                                                                                                                              | Cele-UNSB01_3:3152376 | 3 | 3152376 | 3152920 | 545   | 14  | 35  | AATTGCCGGA   |
| AATTGCCGGAATTGAA ACTTTCCGGCGCAATTGGAA                                                                                                                     |                       |   |         |         |       |     |     |              |
| UNSB01.fasta                                                                                                                                              | Cele-UNSB01_3:3159908 | 3 | 3159908 | 3160529 | 622   | 13  | 35  | AAATCGGCAA   |
| AAATCGGAAAAATTGCCGGAATTGAAA ATTTCCAGA                                                                                                                     |                       |   |         |         |       |     |     |              |
| UNSB01.fasta                                                                                                                                              | Cele-UNSB01_3:3164980 | 3 | 3164980 | 3165718 | 739   | 38  | 18  | GTCGATTTAC   |
| GTCGATTTACGAGATTTT                                                                                                                                        |                       |   |         |         |       |     |     |              |
| UNSB01.fasta                                                                                                                                              | Cele-UNSB01_3:3200630 | 3 | 3200630 | 3201398 | 769   | 4   | 151 | TTTAAAGGCG   |
| TTTAAAGGAGCATAACCCAATTTCCCTCTTCATTTTCGAGGAAATCACTTAAAAATTTGAATTCCTTTGAAAAATTC CAGTCAAAACACACTTTTATTAAGCCTCTAACGTCGATTTTAACTATTTCCGGGTCTCGCCACGAAAAATTGT   |                       |   |         |         |       |     |     |              |

|                                                                                                |                       |   |         |         |       |      |    |             |
|------------------------------------------------------------------------------------------------|-----------------------|---|---------|---------|-------|------|----|-------------|
| UNSB01.fasta                                                                                   | Cele-UNSB01_3:3352849 | 3 | 3352849 | 3353088 | 240   | 8    | 30 | TAGAACTTTC  |
| TAGAACTTTC                                                                                     |                       |   |         |         |       |      |    |             |
| UNSB01.fasta                                                                                   | Cele-UNSB01_3:3356021 | 3 | 3356021 | 3356788 | 768   | 13   | 19 | CTTGGCGCAA  |
| CTTGGCGCAATTCTCGTGC                                                                            |                       |   |         |         |       |      |    |             |
| UNSB01.fasta                                                                                   | Cele-UNSB01_3:3394846 | 3 | 3394846 | 3394930 | 85    | 4    | 21 | TCCAGCACTG  |
| TCCAGCACTGACAAATTTTGT                                                                          |                       |   |         |         |       |      |    |             |
| UNSB01.fasta                                                                                   | Cele-UNSB01_3:3456121 | 3 | 3456121 | 3456336 | 216   | 18   | 12 | AAAAATAAAAA |
| AAAAATAAAAA                                                                                    |                       |   |         |         |       |      |    |             |
| UNSB01.fasta                                                                                   | Cele-UNSB01_3:3456392 | 3 | 3456392 | 3470370 | 13979 | 556  | 25 | ACTCTCTGGC  |
| ACTCTCTGGCTTCCCACTATATTTT                                                                      |                       |   |         |         |       |      |    |             |
| UNSB01.fasta                                                                                   | Cele-UNSB01_3:3480039 | 3 | 3480039 | 3480224 | 186   | 12   | 12 | TAGGCTTAGG  |
| TAGGCTCAGGCT                                                                                   |                       |   |         |         |       |      |    |             |
| UNSB01.fasta                                                                                   | Cele-UNSB01_3:3518362 | 3 | 3518362 | 3520167 | 1806  | 19   | 95 | TAATCCTATT  |
| TAATCCTATTCCAATCAGATTGTTATTTCGCTCAAGCCTACAAATCAGGTTTGAGGGCCGAGGCCCGAACACTCTTGGAACTGTGGGCCAGCTT |                       |   |         |         |       |      |    |             |
| UNSB01.fasta                                                                                   | Cele-UNSB01_3:3579672 | 3 | 3579672 | 3580411 | 740   | 47   | 15 | GTGGTGAGAC  |
| GTGGTGAGACCCGTC                                                                                |                       |   |         |         |       |      |    |             |
| UNSB01.fasta                                                                                   | Cele-UNSB01_3:3676441 | 3 | 3676441 | 3676612 | 172   | 5    | 34 | AATTGAAATT  |
| AATTGAAATTTCCTGCAAAGCGCAAATGCCGA                                                               |                       |   |         |         |       |      |    |             |
| UNSB01.fasta                                                                                   | Cele-UNSB01_3:3780853 | 3 | 3780853 | 3780925 | 73    | 4    | 16 | CCTACATACC  |
| CCTACATACCTACATA                                                                               |                       |   |         |         |       |      |    |             |
| UNSB01.fasta                                                                                   | Cele-UNSB01_3:3795055 | 3 | 3795055 | 3795458 | 404   | 8    | 35 | TTCCGGCAAA  |
| TTCCGGCAAAATCGACAATTTCCGAAAATGAAAAT                                                            |                       |   |         |         |       |      |    |             |
| UNSB01.fasta                                                                                   | Cele-UNSB01_3:3799869 | 3 | 3799869 | 3800537 | 669   | 5    | 65 | AAGACACTAA  |
| AAGACACTAATAAAAAATATATTTTATTCGTCTTTAATTTACAAAATTTTCAATAAAAAATTT                                |                       |   |         |         |       |      |    |             |
| UNSB01.fasta                                                                                   | Cele-UNSB01_3:3818464 | 3 | 3818464 | 3818544 | 81    | 5    | 12 | TAAGCCTAAG  |
| TAAGCCTAAGCC                                                                                   |                       |   |         |         |       |      |    |             |
| UNSB01.fasta                                                                                   | Cele-UNSB01_3:3873879 | 3 | 3873879 | 3874448 | 570   | 9    | 30 | CCTTGTAGGC  |
| CCTTGTAGGTAAGGAGGTAGGTGTAGGCCG                                                                 |                       |   |         |         |       |      |    |             |
| UNSB01.fasta                                                                                   | Cele-UNSB01_3:3880760 | 3 | 3880760 | 3880928 | 169   | 10   | 16 | TAGGCATGTA  |
| TAGACATGTAGGCATG                                                                               |                       |   |         |         |       |      |    |             |
| UNSB01.fasta                                                                                   | Cele-UNSB01_3:3928597 | 3 | 3928597 | 3928907 | 311   | 5    | 18 | TGCAGCACTA  |
| TGCAGCACTATTAGAGAC                                                                             |                       |   |         |         |       |      |    |             |
| UNSB01.fasta                                                                                   | Cele-UNSB01_3:4029920 | 3 | 4029920 | 4030220 | 301   | 8    | 40 | AGAACCTTCT  |
| AGAACCTTCTGAAAAATTCTAGAAAAATCTGGAATGGTCC                                                       |                       |   |         |         |       |      |    |             |
| UNSB01.fasta                                                                                   | Cele-UNSB01_3:4030293 | 3 | 4030293 | 4031043 | 751   | 50   | 15 | CGTGGTGAGA  |
| CGTGGCGAGACCCAC                                                                                |                       |   |         |         |       |      |    |             |
| UNSB01.fasta                                                                                   | Cele-UNSB01_3:4031086 | 3 | 4031086 | 4031330 | 245   | 7    | 35 | AATTTAAATT  |
| AATTTAAATTTCTGTGAGAAATATTTTGGCGGGA                                                             |                       |   |         |         |       |      |    |             |
| UNSB01.fasta                                                                                   | Cele-UNSB01_3:4031404 | 3 | 4031404 | 4032964 | 1561  | 39   | 40 | GTTCCAGAAC  |
| GTTCCAGAACTTTCTAGAAAAATCGAGAAAAATCTGGAAT                                                       |                       |   |         |         |       |      |    |             |
| UNSB01.fasta                                                                                   | Cele-UNSB01_3:4122367 | 3 | 4122367 | 4122965 | 599   | 31   | 19 | AAAAATAGAT  |
| AAAAATAGATTGTTACACG                                                                            |                       |   |         |         |       |      |    |             |
| UNSB01.fasta                                                                                   | Cele-UNSB01_3:4344679 | 3 | 4344679 | 4344767 | 89    | 4    | 22 | CAAAACCCAA  |
| CAAAACCCAAAGTAGATCCCACT                                                                        |                       |   |         |         |       |      |    |             |
| UNSB01.fasta                                                                                   | Cele-UNSB01_3:4389614 | 3 | 4389614 | 4389732 | 119   | 7    | 17 | AGGGGGCATC  |
| AGGGGGCATTAGGTCAA                                                                              |                       |   |         |         |       |      |    |             |
| UNSB01.fasta                                                                                   | Cele-UNSB01_3:4392502 | 3 | 4392502 | 4392620 | 119   | 7    | 17 | GATGCCCCCT  |
| GATGCCCCCTCTGAATG                                                                              |                       |   |         |         |       |      |    |             |
| UNSB01.fasta                                                                                   | Cele-UNSB01_3:4778835 | 3 | 4778835 | 4779093 | 259   | 5    | 17 | ATTATTTTCA  |
| ATTATTTTCATTCCGTG                                                                              |                       |   |         |         |       |      |    |             |
| UNSB01.fasta                                                                                   | Cele-UNSB01_3:5426163 | 3 | 5426163 | 5426753 | 591   | 28   | 20 | CTAGGTCTGC  |
| CTAGGTCTGCCTAGGGTAGG                                                                           |                       |   |         |         |       |      |    |             |
| UNSB01.fasta                                                                                   | Cele-UNSB01_3:5426187 | 3 | 5426187 | 5427065 | 879   | 40   | 20 | GGTAGGCTAG  |
| GGTAGGCTAGGTCTGCCCAG                                                                           |                       |   |         |         |       |      |    |             |
| UNSB01.fasta                                                                                   | Cele-UNSB01_3:5494321 | 3 | 5494321 | 5534864 | 40544 | 1542 | 26 | GTTAGAGTCA  |
| GTTAGAGTCATTATTTTAGGTGAATG                                                                     |                       |   |         |         |       |      |    |             |
| UNSB01.fasta                                                                                   | Cele-UNSB01_3:5534873 | 3 | 5534873 | 5535003 | 131   | 5    | 26 | ACCATTCAACC |
| ACCATTCAACCAAAATAATGACTCTA                                                                     |                       |   |         |         |       |      |    |             |

|                                                                                                                                                     |                       |   |         |         |       |      |     |            |
|-----------------------------------------------------------------------------------------------------------------------------------------------------|-----------------------|---|---------|---------|-------|------|-----|------------|
| UNSB01.fasta                                                                                                                                        | Cele-UNSB01_3:6120416 | 3 | 6120416 | 6122897 | 2482  | 10   | 228 | CCACCAGATC |
| CCACCAGATCAGCAGCGTCTCATCTTCGCCGGAAAGCAGCTCGAGGACGGCCGCACCTGTCTGACTACAAATCCAGAAGGAATCTACTCTTCACTTGGTTCTTCGTCTTAGAGGAGGAATGCAGATCTTTGTCAAGACTTTGACTGG |                       |   |         |         |       |      |     |            |
| AAAGACCATCACACTTGAAGTTGAAGCTTCCGACACGATCGAGAACGTCAAGGCCAAGATTCAAGACAAGGAGGGAATC                                                                     |                       |   |         |         |       |      |     |            |
| UNSB01.fasta                                                                                                                                        | Cele-UNSB01_3:6192343 | 3 | 6192343 | 6192405 | 63    | 4    | 15  | CGAAAAGGGG |
| CGAAAAGGGGATCTG                                                                                                                                     |                       |   |         |         |       |      |     |            |
| UNSB01.fasta                                                                                                                                        | Cele-UNSB01_3:6192580 | 3 | 6192580 | 6192657 | 78    | 5    | 15  | TCCCCTTTTC |
| TCCCCTTTTCGTATC                                                                                                                                     |                       |   |         |         |       |      |     |            |
| UNSB01.fasta                                                                                                                                        | Cele-UNSB01_3:6364525 | 3 | 6364525 | 6365839 | 1315  | 65   | 19  | AAAAATAGAT |
| AAAAATAGATTGTTACACG                                                                                                                                 |                       |   |         |         |       |      |     |            |
| UNSB01.fasta                                                                                                                                        | Cele-UNSB01_3:6731291 | 3 | 6731291 | 6731428 | 138   | 9    | 15  | CGAAAAGGGG |
| CGAAAAGGGGATCTG                                                                                                                                     |                       |   |         |         |       |      |     |            |
| UNSB01.fasta                                                                                                                                        | Cele-UNSB01_3:6731603 | 3 | 6731603 | 6731679 | 77    | 5    | 15  | TCCCCTTTTC |
| TCCCCTTTTCGTATC                                                                                                                                     |                       |   |         |         |       |      |     |            |
| UNSB01.fasta                                                                                                                                        | Cele-UNSB01_3:6746945 | 3 | 6746945 | 6756350 | 9406  | 204  | 11  | GTACTGTAGG |
| GTACTGTAGTA                                                                                                                                         |                       |   |         |         |       |      |     |            |
| UNSB01.fasta                                                                                                                                        | Cele-UNSB01_3:6807960 | 3 | 6807960 | 6808176 | 217   | 6    | 21  | AAATCTAATC |
| AAATCTAATCCAATATGGCCG                                                                                                                               |                       |   |         |         |       |      |     |            |
| UNSB01.fasta                                                                                                                                        | Cele-UNSB01_3:7587437 | 3 | 7587437 | 7632311 | 44875 | 1482 | 27  | GTGGGAAGCC |
| GTGGGAAGCCACAGAGTAAAAATA                                                                                                                            |                       |   |         |         |       |      |     |            |
| UNSB01.fasta                                                                                                                                        | Cele-UNSB01_3:7632425 | 3 | 7632425 | 7683091 | 50667 | 426  | 94  | AAAGCACCCA |
| AAAGCACCCAATATTAGAGAACAGAAGATTTTGAGAATTACTGCCTCCAGAAATTGATGATTTTCCCATTGATTGTCTACATAGGCATCGA                                                         |                       |   |         |         |       |      |     |            |
| UNSB01.fasta                                                                                                                                        | Cele-UNSB01_3:7683133 | 3 | 7683133 | 7684661 | 1529  | 131  | 11  | TGGAGCGGTT |
| TGGAGCGGTTT                                                                                                                                         |                       |   |         |         |       |      |     |            |
| UNSB01.fasta                                                                                                                                        | Cele-UNSB01_3:7825014 | 3 | 7825014 | 7825135 | 122   | 11   | 11  | CGGATAATTA |
| CGGATAATTAA                                                                                                                                         |                       |   |         |         |       |      |     |            |
| UNSB01.fasta                                                                                                                                        | Cele-UNSB01_3:7826007 | 3 | 7826007 | 7841897 | 15891 | 610  | 26  | CATTAGATGA |
| CATTAGATGAATTTCCAAAGTTAGAC                                                                                                                          |                       |   |         |         |       |      |     |            |
| UNSB01.fasta                                                                                                                                        | Cele-UNSB01_3:7846966 | 3 | 7846966 | 7847368 | 403   | 9    | 45  | TCTGATCCTT |
| TCTGATCCTTCAGATAAGAAGGATCGTAAGGGTACCTCCTGATGG                                                                                                       |                       |   |         |         |       |      |     |            |
| UNSB01.fasta                                                                                                                                        | Cele-UNSB01_3:7847664 | 3 | 7847664 | 7848155 | 492   | 11   | 45  | GAAGGATCAG |
| GAAGGATCAGACCATCAGGAGGTACCTTACGATCCTTCTTATCT                                                                                                        |                       |   |         |         |       |      |     |            |
| UNSB01.fasta                                                                                                                                        | Cele-UNSB01_3:7913456 | 3 | 7913456 | 7913988 | 533   | 28   | 19  | AATCTATTTT |
| AATCTATTTTTTCGTGTAAC                                                                                                                                |                       |   |         |         |       |      |     |            |
| UNSB01.fasta                                                                                                                                        | Cele-UNSB01_3:7922958 | 3 | 7922958 | 7923224 | 267   | 14   | 19  | CAATCTATTT |
| CAATCTATTTTTTCGTGGAA                                                                                                                                |                       |   |         |         |       |      |     |            |
| UNSB01.fasta                                                                                                                                        | Cele-UNSB01_3:7953449 | 3 | 7953449 | 7953511 | 63    | 4    | 15  | CGAAAAGGGG |
| CGAAAAGGGGATCTG                                                                                                                                     |                       |   |         |         |       |      |     |            |
| UNSB01.fasta                                                                                                                                        | Cele-UNSB01_3:7953695 | 3 | 7953695 | 7953787 | 93    | 6    | 15  | TCCCCTTTTC |
| TCCCCTTTTCGTATC                                                                                                                                     |                       |   |         |         |       |      |     |            |
| UNSB01.fasta                                                                                                                                        | Cele-UNSB01_3:8499608 | 3 | 8499608 | 8499713 | 106   | 5    | 21  | AAGTTTTACT |
| AAGTTTTACTTTGATTTTTTT                                                                                                                               |                       |   |         |         |       |      |     |            |
| UNSB01.fasta                                                                                                                                        | Cele-UNSB01_3:8579889 | 3 | 8579889 | 8580089 | 201   | 12   | 16  | AGGCACGTAG |
| AGGAACGTAGGCACGT                                                                                                                                    |                       |   |         |         |       |      |     |            |
| UNSB01.fasta                                                                                                                                        | Cele-UNSB01_3:8580701 | 3 | 8580701 | 8581151 | 451   | 29   | 15  | ACCCATCGTG |
| ACCCATCGTGCGAG                                                                                                                                      |                       |   |         |         |       |      |     |            |
| UNSB01.fasta                                                                                                                                        | Cele-UNSB01_3:8581179 | 3 | 8581179 | 8581353 | 175   | 5    | 35  | GGGAAATTTA |
| GGGAAATTTTAAATTTCTGTGAAAAATATTTTGGC                                                                                                                 |                       |   |         |         |       |      |     |            |
| UNSB01.fasta                                                                                                                                        | Cele-UNSB01_3:8581474 | 3 | 8581474 | 8581754 | 281   | 7    | 40  | TCTGGAATGT |
| TCTGGAATGTTCCAGAACTTCTAGAAAAATTGGGAAAAG                                                                                                             |                       |   |         |         |       |      |     |            |
| UNSB01.fasta                                                                                                                                        | Cele-UNSB01_3:8589669 | 3 | 8589669 | 8589949 | 281   | 7    | 40  | TCTGGAATGT |
| TCTGGAATGTTCCAGAACTTCTAGAAAAATTGGGAAAAG                                                                                                             |                       |   |         |         |       |      |     |            |
| UNSB01.fasta                                                                                                                                        | Cele-UNSB01_3:8597864 | 3 | 8597864 | 8598144 | 281   | 7    | 40  | TCTGGAATGT |
| TCTGGAATGTTCCAGAACTTCTAGAAAAATTGGGAAAAG                                                                                                             |                       |   |         |         |       |      |     |            |
| UNSB01.fasta                                                                                                                                        | Cele-UNSB01_3:8606059 | 3 | 8606059 | 8606339 | 281   |      |     |            |

|                                                                                                                                                                    |                        |   |          |          |      |     |     |            |
|--------------------------------------------------------------------------------------------------------------------------------------------------------------------|------------------------|---|----------|----------|------|-----|-----|------------|
| UNSB01.fasta                                                                                                                                                       | Cele-UNSB01_3:9809905  | 3 | 9809905  | 9810297  | 393  | 13  | 11  | GTACTGTAGG |
| GTACTGTAGGG                                                                                                                                                        |                        |   |          |          |      |     |     |            |
| UNSB01.fasta                                                                                                                                                       | Cele-UNSB01_3:9810383  | 3 | 9810383  | 9810703  | 321  | 8   | 40  | TCCAGAACCT |
| TCCAGAACCTTCTGGAAATCCGAGAAAATTCTGGAATGT                                                                                                                            |                        |   |          |          |      |     |     |            |
| UNSB01.fasta                                                                                                                                                       | Cele-UNSB01_3:9810418  | 3 | 9810418  | 9811039  | 622  | 9   | 40  | AATGTTCCAG |
| AATGTTCCAGAACCTTCTGGAAATTTGAGAAAATGCTGG                                                                                                                            |                        |   |          |          |      |     |     |            |
| UNSB01.fasta                                                                                                                                                       | Cele-UNSB01_3:10130069 | 3 | 10130069 | 10130193 | 125  | 4   | 31  | TCTGCTAAAT |
| TCTGCTAAATAATTAGCAGACCATACTTGAT                                                                                                                                    |                        |   |          |          |      |     |     |            |
| UNSB01.fasta                                                                                                                                                       | Cele-UNSB01_3:10140093 | 3 | 10140093 | 10140163 | 71   | 4   | 19  | TGGTTGAGGC |
| TGGTTGAGGCTCTAGATTT                                                                                                                                                |                        |   |          |          |      |     |     |            |
| UNSB01.fasta                                                                                                                                                       | Cele-UNSB01_3:10146078 | 3 | 10146078 | 10146173 | 96   | 5   | 19  | ATTTTGGTTG |
| ATTTTGGTTGAGGTTGAGG                                                                                                                                                |                        |   |          |          |      |     |     |            |
| UNSB01.fasta                                                                                                                                                       | Cele-UNSB01_3:10214948 | 3 | 10214948 | 10215134 | 187  | 6   | 31  | TCTGCTAAAT |
| TCTGCTAAATATTTAGCATACCCACATTGGG                                                                                                                                    |                        |   |          |          |      |     |     |            |
| UNSB01.fasta                                                                                                                                                       | Cele-UNSB01_3:10216874 | 3 | 10216874 | 10217114 | 241  | 12  | 20  | AAAAATAGAT |
| AAAAATAGATTGACATACCA                                                                                                                                               |                        |   |          |          |      |     |     |            |
| UNSB01.fasta                                                                                                                                                       | Cele-UNSB01_3:10234987 | 3 | 10234987 | 10235185 | 199  | 4   | 31  | TATGCTAAAT |
| TATGCTAAATATTTAGCAGACCCACGTTGG                                                                                                                                     |                        |   |          |          |      |     |     |            |
| UNSB01.fasta                                                                                                                                                       | Cele-UNSB01_3:10399868 | 3 | 10399868 | 10399945 | 78   | 5   | 15  | CGAAAAGGGG |
| CGAAAAGGGGATCTG                                                                                                                                                    |                        |   |          |          |      |     |     |            |
| UNSB01.fasta                                                                                                                                                       | Cele-UNSB01_3:10400120 | 3 | 10400120 | 10400212 | 93   | 5   | 15  | TCCCCTTTTC |
| TCCCCTTTTCGAGA                                                                                                                                                     |                        |   |          |          |      |     |     |            |
| UNSB01.fasta                                                                                                                                                       | Cele-UNSB01_3:10519446 | 3 | 10519446 | 10519548 | 103  | 8   | 12  | AAAACTAAAA |
| AAAACTAAAAAT                                                                                                                                                       |                        |   |          |          |      |     |     |            |
| UNSB01.fasta                                                                                                                                                       | Cele-UNSB01_3:10519570 | 3 | 10519570 | 10525291 | 5722 | 35  | 164 | ATGCCAATCA |
| ATGCCAATCAAAGTATAATAGCTTTATACGGAAGTATTTTTTAAAACTGATAAAAAATATATAAAAGCTGATTTTTTCAAAAATTCAAAAGTATGGGAAAATCATATGGAGTCATTCTTTTTTATTGCATAAACTGTTTCAGCGTAGTCAAAAATACCGAAT |                        |   |          |          |      |     |     |            |
| UNSB01.fasta                                                                                                                                                       | Cele-UNSB01_3:10614332 | 3 | 10614332 | 10615157 | 826  | 20  | 40  | AAAAGTAGGT |
| AAAAGTAGGTCATGGCCTAGTTTTTAACGTGACCTCCTTA                                                                                                                           |                        |   |          |          |      |     |     |            |
| UNSB01.fasta                                                                                                                                                       | Cele-UNSB01_3:10733639 | 3 | 10733639 | 10733701 | 63   | 4   | 15  | CGAAAAGGGG |
| CGAAAAGGGGATCTG                                                                                                                                                    |                        |   |          |          |      |     |     |            |
| UNSB01.fasta                                                                                                                                                       | Cele-UNSB01_3:10733861 | 3 | 10733861 | 10733953 | 93   | 6   | 15  | TCCCCTTTTC |
| TCCCCTTTTCGTATC                                                                                                                                                    |                        |   |          |          |      |     |     |            |
| UNSB01.fasta                                                                                                                                                       | Cele-UNSB01_3:10778310 | 3 | 10778310 | 10778713 | 404  | 14  | 16  | GTAGGCACGT |
| GTAGGCAGGTAGGCAC                                                                                                                                                   |                        |   |          |          |      |     |     |            |
| UNSB01.fasta                                                                                                                                                       | Cele-UNSB01_3:10787273 | 3 | 10787273 | 10787444 | 172  | 5   | 34  | TTTCCGGCAA |
| TTTCCGGCAAATCGGCGAATTGCCGGAATTGAAT                                                                                                                                 |                        |   |          |          |      |     |     |            |
| UNSB01.fasta                                                                                                                                                       | Cele-UNSB01_3:10934450 | 3 | 10934450 | 10934819 | 370  | 11  | 29  | GGCCTAGAAA |
| GGCCTAGAAAACCCATTTTTAAAGTTGGT                                                                                                                                      |                        |   |          |          |      |     |     |            |
| UNSB01.fasta                                                                                                                                                       | Cele-UNSB01_3:10975904 | 3 | 10975904 | 10976322 | 419  | 11  | 35  | CCGCCAAAAT |
| CCGCCAAAATATTTTTCACTAAAAATTTGAATTC                                                                                                                                 |                        |   |          |          |      |     |     |            |
| UNSB01.fasta                                                                                                                                                       | Cele-UNSB01_3:10980699 | 3 | 10980699 | 10982201 | 1503 | 43  | 35  | AAATTCAAAT |
| AAATTCAAATTTTAGTGAAAAATATTTTTGGCGGA                                                                                                                                |                        |   |          |          |      |     |     |            |
| UNSB01.fasta                                                                                                                                                       | Cele-UNSB01_3:11090269 | 3 | 11090269 | 11090626 | 358  | 8   | 45  | TCTGATCCTT |
| TCTGATCCTTCAGATAAGAAAGATCGTAAGGGTACCTCCTGATGG                                                                                                                      |                        |   |          |          |      |     |     |            |
| UNSB01.fasta                                                                                                                                                       | Cele-UNSB01_3:11094399 | 3 | 11094399 | 11094498 | 100  | 5   | 20  | GTTACACGAA |
| GTTACACGAAAAAATAGATT                                                                                                                                               |                        |   |          |          |      |     |     |            |
| UNSB01.fasta                                                                                                                                                       | Cele-UNSB01_3:11109268 | 3 | 11109268 | 11109343 | 76   | 5   | 15  | TCCCCTTTTC |
| TCCCCTTTTCATATC                                                                                                                                                    |                        |   |          |          |      |     |     |            |
| UNSB01.fasta                                                                                                                                                       | Cele-UNSB01_3:11222702 | 3 | 11222702 | 11222792 | 91   | 6   | 12  | GGCTTAGGCT |
| GGCTTAGGCTTA                                                                                                                                                       |                        |   |          |          |      |     |     |            |
| UNSB01.fasta                                                                                                                                                       | Cele-UNSB01_3:11241850 | 3 | 11241850 | 11242636 | 787  | 15  | 37  | TTGGCGGGAA |
| TTGGCAGGAATTCAAATTTTAATTTTTTAAAAATATT                                                                                                                              |                        |   |          |          |      |     |     |            |
| UNSB01.fasta                                                                                                                                                       | Cele-UNSB01_3:11273157 | 3 | 11273157 | 11273241 | 85   | 5   | 12  | GGCTTAGGCT |
| GGCTTAAGCTCA                                                                                                                                                       |                        |   |          |          |      |     |     |            |
| UNSB01.fasta                                                                                                                                                       | Cele-UNSB01_3:11300832 | 3 | 11300832 | 11300986 | 155  | 5   | 31  | GCAGCCGACG |
| GCAGCCGACGCTCTGCGAGGTTTGTAGAATG                                                                                                                                    |                        |   |          |          |      |     |     |            |
| UNSB01.fasta                                                                                                                                                       | Cele-UNSB01_3:11302620 | 3 | 11302620 | 11306800 | 4181 | 209 | 20  | TCTATTTTTT |
| TCTATTTTTTGGTATGTCAA                                                                                                                                               |                        |   |          |          |      |     |     |            |



|                                                                                                                                                         |                        |   |          |          |      |    |     |             |
|---------------------------------------------------------------------------------------------------------------------------------------------------------|------------------------|---|----------|----------|------|----|-----|-------------|
| UNSB01.fasta                                                                                                                                            | Cele-UNSB01_3:11327560 | 3 | 11327560 | 11327604 | 45   | 4  | 11  | AAACTTGGGC  |
| AAACTTGGGTA                                                                                                                                             |                        |   |          |          |      |    |     |             |
| UNSB01.fasta                                                                                                                                            | Cele-UNSB01_3:11452503 | 3 | 11452503 | 11452739 | 237  | 6  | 35  | AATTGCCGGA  |
| AATTGCCGGAATTAAAGATTTCGGCAAATTGGCC                                                                                                                      |                        |   |          |          |      |    |     |             |
| UNSB01.fasta                                                                                                                                            | Cele-UNSB01_3:11461018 | 3 | 11461018 | 11461218 | 201  | 5  | 40  | TCCAGAACCT  |
| TCCAGAACCTTCTTGAAAAATTTGAGAAAAATGCTGGAATGT                                                                                                              |                        |   |          |          |      |    |     |             |
| UNSB01.fasta                                                                                                                                            | Cele-UNSB01_3:11461401 | 3 | 11461401 | 11461721 | 321  | 10 | 32  | TTTCTGTGAA  |
| TTTCTGTGAAAAATTATAACGGGAATTCAAAA                                                                                                                        |                        |   |          |          |      |    |     |             |
| UNSB01.fasta                                                                                                                                            | Cele-UNSB01_3:11489719 | 3 | 11489719 | 11490125 | 407  | 12 | 31  | TCTGAGCTAC  |
| TCTGAGCTACAGTACTCCTGTCAAGAACAGT                                                                                                                         |                        |   |          |          |      |    |     |             |
| UNSB01.fasta                                                                                                                                            | Cele-UNSB01_3:11508351 | 3 | 11508351 | 11508507 | 157  | 10 | 12  | GCTTAGGCTT  |
| GCCTAGGCTTAG                                                                                                                                            |                        |   |          |          |      |    |     |             |
| UNSB01.fasta                                                                                                                                            | Cele-UNSB01_3:11522131 | 3 | 11522131 | 11522299 | 169  | 11 | 14  | GATAATTGAA  |
| GATAATTGAAAATC                                                                                                                                          |                        |   |          |          |      |    |     |             |
| UNSB01.fasta                                                                                                                                            | Cele-UNSB01_3:11543247 | 3 | 11543247 | 11543687 | 441  | 21 | 21  | GGCAATTTTC  |
| GGCAATTTTCCAGTGCAATTC                                                                                                                                   |                        |   |          |          |      |    |     |             |
| UNSB01.fasta                                                                                                                                            | Cele-UNSB01_3:11612201 | 3 | 11612201 | 11612410 | 210  | 6  | 35  | GATTTGCCGG  |
| GATTTGCCGGAAATATTAAATCCGGCAATTTATC                                                                                                                      |                        |   |          |          |      |    |     |             |
| UNSB01.fasta                                                                                                                                            | Cele-UNSB01_3:11614727 | 3 | 11614727 | 11615007 | 281  | 6  | 35  | TTGCCGGATT  |
| TTGCCGGATTGAAATATTTTCGGCAAATCTGCAGT                                                                                                                     |                        |   |          |          |      |    |     |             |
| UNSB01.fasta                                                                                                                                            | Cele-UNSB01_3:11631810 | 3 | 11631810 | 11631935 | 126  | 4  | 11  | CTACAGTACT  |
| CTACAGTACTC                                                                                                                                             |                        |   |          |          |      |    |     |             |
| UNSB01.fasta                                                                                                                                            | Cele-UNSB01_3:11700261 | 3 | 11700261 | 11701084 | 824  | 59 | 14  | AATTATAAAT  |
| AATTATAAATTAGA                                                                                                                                          |                        |   |          |          |      |    |     |             |
| UNSB01.fasta                                                                                                                                            | Cele-UNSB01_3:11723112 | 3 | 11723112 | 11723392 | 281  | 6  | 35  | TTTGCCGGAA  |
| TTTGCCGGAAATTTTATTCTGGCAATTGACGA                                                                                                                        |                        |   |          |          |      |    |     |             |
| UNSB01.fasta                                                                                                                                            | Cele-UNSB01_3:11725694 | 3 | 11725694 | 11725970 | 277  | 12 | 12  | TTAGGCTTAG  |
| TTAGGCTTAGGC                                                                                                                                            |                        |   |          |          |      |    |     |             |
| UNSB01.fasta                                                                                                                                            | Cele-UNSB01_3:11779688 | 3 | 11779688 | 11779808 | 121  | 10 | 12  | CTTAGGCTTA  |
| CTTAGACTTATG                                                                                                                                            |                        |   |          |          |      |    |     |             |
| UNSB01.fasta                                                                                                                                            | Cele-UNSB01_3:11779996 | 3 | 11779996 | 11780140 | 145  | 7  | 16  | TACAAGCCTA  |
| TACACGCCTACAAGCC                                                                                                                                        |                        |   |          |          |      |    |     |             |
| UNSB01.fasta                                                                                                                                            | Cele-UNSB01_3:11800186 | 3 | 11800186 | 11800737 | 552  | 15 | 34  | AAATTTCAAT  |
| AAATTTCAATTCCGCTAATTGCCGATTGCTGG                                                                                                                        |                        |   |          |          |      |    |     |             |
| UNSB01.fasta                                                                                                                                            | Cele-UNSB01_3:11834269 | 3 | 11834269 | 11834616 | 348  | 10 | 34  | TTTTCGATTT  |
| TTTTCGATTTTTCGATTTTGTGAAAAATCGGGAA                                                                                                                      |                        |   |          |          |      |    |     |             |
| UNSB01.fasta                                                                                                                                            | Cele-UNSB01_3:11851795 | 3 | 11851795 | 11852785 | 991  | 24 | 35  | CGGCAAATCG  |
| CGGCAAATCGGCAAGTTGCCAAAATGAAAAATCC                                                                                                                      |                        |   |          |          |      |    |     |             |
| UNSB01.fasta                                                                                                                                            | Cele-UNSB01_3:11898352 | 3 | 11898352 | 11906615 | 8264 | 45 | 184 | TACGCAGCCG  |
| TACGCAGCCGAACGTATCATAAGTGAATACAGAACACCAATTATGTCCGAGAAAAAGATCCTACTCAGAATATGAACATATCAAAAAATATCGGAGGTATATAGATTCCCGAAGAGCCTTTCCAATTAAACCAAACGGTTCAAATTTCTAG |                        |   |          |          |      |    |     |             |
| CAAACATCTCCTTACTTGAACACTCTTGGCCAATG                                                                                                                     |                        |   |          |          |      |    |     |             |
| UNSB01.fasta                                                                                                                                            | Cele-UNSB01_3:11990778 | 3 | 11990778 | 11991299 | 522  | 14 | 35  | CCGATTTGCC  |
| CCGATTTGCCGGAATTTTCAAATCCGGCAATTTT                                                                                                                      |                        |   |          |          |      |    |     |             |
| UNSB01.fasta                                                                                                                                            | Cele-UNSB01_3:12003957 | 3 | 12003957 | 12004292 | 336  | 7  | 11  | GTAAGCTAGAG |
| GTAAGCTAGAG                                                                                                                                             |                        |   |          |          |      |    |     |             |
| UNSB01.fasta                                                                                                                                            | Cele-UNSB01_3:12010851 | 3 | 12010851 | 12011440 | 590  | 30 | 12  | GGCTTAGGCT  |
| GGCTTAGGTATA                                                                                                                                            |                        |   |          |          |      |    |     |             |
| UNSB01.fasta                                                                                                                                            | Cele-UNSB01_3:12025839 | 3 | 12025839 | 12025976 | 138  | 8  | 12  | TAAGCCTAAG  |
| TAAGCCTAAACC                                                                                                                                            |                        |   |          |          |      |    |     |             |
| UNSB01.fasta                                                                                                                                            | Cele-UNSB01_3:12040777 | 3 | 12040777 | 12040867 | 91   | 6  | 12  | CCTAAGCCTA  |
| CCTAACCCTAAC                                                                                                                                            |                        |   |          |          |      |    |     |             |
| UNSB01.fasta                                                                                                                                            | Cele-UNSB01_3:12087067 | 3 | 12087067 | 12087157 | 91   | 4  | 12  | AGCCTGAGCC  |
| AGCCTGAGCCTC                                                                                                                                            |                        |   |          |          |      |    |     |             |
| UNSB01.fasta                                                                                                                                            | Cele-UNSB01_3:12088649 | 3 | 12088649 | 12088899 | 251  | 9  | 12  | TAAGCCTAAG  |
| TAAGCCTAAGCC                                                                                                                                            |                        |   |          |          |      |    |     |             |
| UNSB01.fasta                                                                                                                                            | Cele-UNSB01_3:12102276 | 3 | 12102276 | 12102493 | 218  | 6  | 34  | TTGCCGAATT  |
| TTGCCGAATTGCTATTTGCCGAGCTTGTCAAAT                                                                                                                       |                        |   |          |          |      |    |     |             |
| UNSB01.fasta                                                                                                                                            | Cele-UNSB01_3:12120993 | 3 | 12120993 | 12121420 | 428  | 12 | 35  | AATTGCCGGA  |
| AATTGCTGGAATTGAAATTTCCGGAATAATCGGCA                                                                                                                     |                        |   |          |          |      |    |     |             |

|                                             |                        |   |          |          |      |    |    |             |
|---------------------------------------------|------------------------|---|----------|----------|------|----|----|-------------|
| UNSB01.fasta                                | Cele-UNSB01_3:12166501 | 3 | 12166501 | 12166666 | 166  | 15 | 11 | ACATTTTTTTG |
| ACATTTTTTTGA                                |                        |   |          |          |      |    |    |             |
| UNSB01.fasta                                | Cele-UNSB01_3:12168292 | 3 | 12168292 | 12168722 | 431  | 13 | 34 | AAGTATTTTT  |
| AAGTATTTTTTGCCGGTTTTTTTGCCATAAATTTCC        |                        |   |          |          |      |    |    |             |
| UNSB01.fasta                                | Cele-UNSB01_3:12227970 | 3 | 12227970 | 12228196 | 227  | 6  | 35 | TTCCGGCAAA  |
| TTCTGGCAAATTCACAAATGCCCGAACTAAAAAA          |                        |   |          |          |      |    |    |             |
| UNSB01.fasta                                | Cele-UNSB01_3:12229422 | 3 | 12229422 | 12230200 | 779  | 21 | 35 | TTCAATTCCG  |
| TTCAATTCCGCAATTGCGCAATTGCGGAAATT            |                        |   |          |          |      |    |    |             |
| UNSB01.fasta                                | Cele-UNSB01_3:12305276 | 3 | 12305276 | 12305678 | 403  | 10 | 40 | ATTCCAGAAT  |
| ATTCCAGAATTCTTGGAAATTTCCAAAAGGTTCTAGAAC     |                        |   |          |          |      |    |    |             |
| UNSB01.fasta                                | Cele-UNSB01_3:12308090 | 3 | 12308090 | 12308555 | 466  | 12 | 35 | AAAATTTCCG  |
| AAAATTTCCGGTAAATCGGCAAATAGCCGGAAATTG        |                        |   |          |          |      |    |    |             |
| UNSB01.fasta                                | Cele-UNSB01_3:12309471 | 3 | 12309471 | 12309813 | 343  | 8  | 35 | GGAATTGAAA  |
| GGAATTGAAAACCTCCGGGAAATCGGCAAAATTGGC        |                        |   |          |          |      |    |    |             |
| UNSB01.fasta                                | Cele-UNSB01_3:12312970 | 3 | 12312970 | 12313186 | 217  | 11 | 20 | AAATAGATTG  |
| AAATAGATTGACAGACGGAA                        |                        |   |          |          |      |    |    |             |
| UNSB01.fasta                                | Cele-UNSB01_3:12321003 | 3 | 12321003 | 12321555 | 553  | 10 | 43 | AATTGCCGGT  |
| AATTGCCGGTTTGCCGATTGCCAGAAATTTTCGGTTTTCGGCA |                        |   |          |          |      |    |    |             |
| UNSB01.fasta                                | Cele-UNSB01_3:12376126 | 3 | 12376126 | 12377123 | 998  | 30 | 32 | AAATTTGTGA  |
| AAATTTGTGAAAATTTAGGCCCATTTTGCTCA            |                        |   |          |          |      |    |    |             |
| UNSB01.fasta                                | Cele-UNSB01_3:12433825 | 3 | 12433825 | 12433951 | 127  | 9  | 12 | TAAGCCTAAG  |
| TAAGTCTAAGCC                                |                        |   |          |          |      |    |    |             |
| UNSB01.fasta                                | Cele-UNSB01_3:12445241 | 3 | 12445241 | 12445717 | 477  | 10 | 32 | ATTCAAATTT  |
| ATTCAAATTTTTTACAGATACATTTTGCGGAAA           |                        |   |          |          |      |    |    |             |
| UNSB01.fasta                                | Cele-UNSB01_3:12447381 | 3 | 12447381 | 12447465 | 85   | 7  | 12 | GGCTTAGGCT  |
| GGCTTAGGCTTA                                |                        |   |          |          |      |    |    |             |
| UNSB01.fasta                                | Cele-UNSB01_3:12475925 | 3 | 12475925 | 12476790 | 866  | 62 | 11 | TTTTTGACA   |
| TTTTTGACAT                                  |                        |   |          |          |      |    |    |             |
| UNSB01.fasta                                | Cele-UNSB01_3:12492090 | 3 | 12492090 | 12492261 | 172  | 7  | 19 | CAATTTACCA  |
| CAATTTACCAAAATTTGT                          |                        |   |          |          |      |    |    |             |
| UNSB01.fasta                                | Cele-UNSB01_3:12493882 | 3 | 12493882 | 12494280 | 399  | 13 | 16 | ACGTAGGCAC  |
| ACGCAGGCACGTAGGC                            |                        |   |          |          |      |    |    |             |
| UNSB01.fasta                                | Cele-UNSB01_3:12499748 | 3 | 12499748 | 12499928 | 181  | 14 | 12 | CTTAGACTTA  |
| CTTAGGCTTAGG                                |                        |   |          |          |      |    |    |             |
| UNSB01.fasta                                | Cele-UNSB01_3:12542724 | 3 | 12542724 | 12542833 | 110  | 5  | 15 | CGACCTGCGA  |
| CGACCTGCGACCTAG                             |                        |   |          |          |      |    |    |             |
| UNSB01.fasta                                | Cele-UNSB01_3:12547936 | 3 | 12547936 | 12548181 | 246  | 7  | 35 | AATTGCCGGA  |
| AATTGCCGGAATTCAAAATTTCCGGCTAATCGGCA         |                        |   |          |          |      |    |    |             |
| UNSB01.fasta                                | Cele-UNSB01_3:12593157 | 3 | 12593157 | 12594697 | 1541 | 44 | 35 | TTGCCAGAAT  |
| TTGCCAGAATTAATAATTTCCGGAAAATCGGCAAG         |                        |   |          |          |      |    |    |             |
| UNSB01.fasta                                | Cele-UNSB01_3:12605711 | 3 | 12605711 | 12605849 | 139  | 9  | 12 | TAGGCATAGG  |
| TAGGCATAGACT                                |                        |   |          |          |      |    |    |             |
| UNSB01.fasta                                | Cele-UNSB01_3:12608882 | 3 | 12608882 | 12609486 | 605  | 14 | 43 | AGCAGCCGAC  |
| AGCAGCTGACAGTCACCGGTTGCCGAAAATTGCAATAATTTC  |                        |   |          |          |      |    |    |             |
| UNSB01.fasta                                | Cele-UNSB01_3:12626974 | 3 | 12626974 | 12627042 | 69   | 4  | 17 | TGAAAAATAAT |
| TGAAAAATAATCACGGAA                          |                        |   |          |          |      |    |    |             |
| UNSB01.fasta                                | Cele-UNSB01_3:12644803 | 3 | 12644803 | 12645326 | 524  | 7  | 35 | TTGCCGGAAT  |
| TTGGCGGAATTGGAAATTTCCGCCAAACCGGCAAA         |                        |   |          |          |      |    |    |             |
| UNSB01.fasta                                | Cele-UNSB01_3:12692847 | 3 | 12692847 | 12693292 | 446  | 15 | 17 | ATTTTTTCCG  |
| ATTTTTCCGCGGTTTCG                           |                        |   |          |          |      |    |    |             |
| UNSB01.fasta                                | Cele-UNSB01_3:12700775 | 3 | 12700775 | 12700871 | 97   | 4  | 24 | AAGCACCACC  |
| AAGCACCACCTCCTCCAACCTACAA                   |                        |   |          |          |      |    |    |             |
| UNSB01.fasta                                | Cele-UNSB01_3:12712606 | 3 | 12712606 | 12713078 | 473  | 10 | 35 | GATTTGCCGG  |
| GATTTGCCGGAAATTTTCGATTCCGGCAAATTGCC         |                        |   |          |          |      |    |    |             |
| UNSB01.fasta                                | Cele-UNSB01_3:12784240 | 3 | 12784240 | 12784411 | 172  | 5  | 35 | AATTTGAATT  |
| AATTTGAATTTCCCGCCAAAATCATTTTCTGAGAA         |                        |   |          |          |      |    |    |             |
| UNSB01.fasta                                | Cele-UNSB01_3:12788650 | 3 | 12788650 | 12788963 | 314  | 8  | 35 | TTCAAATTTT  |
| TTCAAATTTTCTGTGAAAGACTTTTGGCGGTAAA          |                        |   |          |          |      |    |    |             |

|                                                                             |                        |   |          |          |      |     |    |            |
|-----------------------------------------------------------------------------|------------------------|---|----------|----------|------|-----|----|------------|
| UNSB01.fasta                                                                | Cele-UNSB01_3:12817254 | 3 | 12817254 | 12818910 | 1657 | 46  | 36 | GATATTTTCA |
| GATATTTTCATGTTCCGGCAAAGTACCGATTGCGCA                                        |                        |   |          |          |      |     |    |            |
| UNSB01.fasta                                                                | Cele-UNSB01_3:12834918 | 3 | 12834918 | 12835593 | 676  | 18  | 35 | TTTCCGGCAA |
| TTTCCGGCAAAGCGGTAAATTGCGGGAATTGAAAA                                         |                        |   |          |          |      |     |    |            |
| UNSB01.fasta                                                                | Cele-UNSB01_3:12836433 | 3 | 12836433 | 12837192 | 760  | 21  | 34 | TTTCAATTCC |
| TTTCAATTCCGCCAATATACCAATTGCGCGAAG                                           |                        |   |          |          |      |     |    |            |
| UNSB01.fasta                                                                | Cele-UNSB01_3:12842209 | 3 | 12842209 | 12842347 | 139  | 11  | 12 | TATACATATA |
| TATACATATA                                                                  |                        |   |          |          |      |     |    |            |
| UNSB01.fasta                                                                | Cele-UNSB01_3:12885748 | 3 | 12885748 | 12886017 | 270  | 5   | 43 | GGCAAATCGG |
| GGCAAATCGGCAAACCGGGGAATTATTGGAATTGAAAAATTCC                                 |                        |   |          |          |      |     |    |            |
| UNSB01.fasta                                                                | Cele-UNSB01_3:12889217 | 3 | 12889217 | 12889593 | 377  | 11  | 34 | TTTCAATTCC |
| TTTCAATTCCGGCAATTGCGGACTTGCGGAAA                                            |                        |   |          |          |      |     |    |            |
| UNSB01.fasta                                                                | Cele-UNSB01_3:12934390 | 3 | 12934390 | 12934631 | 242  | 8   | 35 | TTTTAATTCC |
| TTTTAATTCCGGCAATTGCGGATTGTCGGAAAT                                           |                        |   |          |          |      |     |    |            |
| UNSB01.fasta                                                                | Cele-UNSB01_3:12996870 | 3 | 12996870 | 12997291 | 422  | 8   | 35 | GGAAATTTTA |
| GGAAATTTTAAATTCGGCAATTGCGCGTTAGCC                                           |                        |   |          |          |      |     |    |            |
| UNSB01.fasta                                                                | Cele-UNSB01_3:13000875 | 3 | 13000875 | 13002076 | 1202 | 5   | 32 | GACCAATCAG |
| GACCAATCAGCGATTGCGCCCGCCCACTCTCT                                            |                        |   |          |          |      |     |    |            |
| UNSB01.fasta                                                                | Cele-UNSB01_3:13002319 | 3 | 13002319 | 13002507 | 189  | 5   | 38 | TTTTGGCGGG |
| TTTTGGCGGGAATTCAAATTTTAATTTTTTTGAAAAATA                                     |                        |   |          |          |      |     |    |            |
| UNSB01.fasta                                                                | Cele-UNSB01_3:13026111 | 3 | 13026111 | 13026534 | 424  | 13  | 35 | AAATTTTGAT |
| AAATTTTGATTTTGGCAATTATCCGATTGCGCGG                                          |                        |   |          |          |      |     |    |            |
| UNSB01.fasta                                                                | Cele-UNSB01_3:13035804 | 3 | 13035804 | 13036305 | 502  | 16  | 35 | ATTGCGCGGA |
| ATTGCGCGGAACATTGATTTTCTGGAATATACCG                                          |                        |   |          |          |      |     |    |            |
| UNSB01.fasta                                                                | Cele-UNSB01_3:13044209 | 3 | 13044209 | 13044762 | 554  | 5   | 32 | ACCAATCAGC |
| ACCAATCAGCGATTGCTCCGCCCACTTTTGA                                             |                        |   |          |          |      |     |    |            |
| UNSB01.fasta                                                                | Cele-UNSB01_3:13065987 | 3 | 13065987 | 13066581 | 595  | 17  | 35 | AAATTCAAAT |
| AAATTCAAATTTTCTGATAAAATATTTTATGGCGGT                                        |                        |   |          |          |      |     |    |            |
| UNSB01.fasta                                                                | Cele-UNSB01_3:13121321 | 3 | 13121321 | 13121505 | 185  | 5   | 31 | GATTTTTTCA |
| GATTTTTTTTCAGGGAAAAACCAAAAAAATTC                                            |                        |   |          |          |      |     |    |            |
| UNSB01.fasta                                                                | Cele-UNSB01_3:13127780 | 3 | 13127780 | 13127920 | 141  | 4   | 35 | CGGCAATTTG |
| CGGCAATTTGCCAAAAATGAAAAATTCGGGCAAT                                          |                        |   |          |          |      |     |    |            |
| UNSB01.fasta                                                                | Cele-UNSB01_3:13139705 | 3 | 13139705 | 13140905 | 1201 | 30  | 20 | TGTAGATTTA |
| TGTAGATTTACGAAATTCTA                                                        |                        |   |          |          |      |     |    |            |
| UNSB01.fasta                                                                | Cele-UNSB01_3:13143562 | 3 | 13143562 | 13144065 | 504  | 16  | 19 | TTGGCAATTT |
| TTGGCATTGACCAAAAAAT                                                         |                        |   |          |          |      |     |    |            |
| UNSB01.fasta                                                                | Cele-UNSB01_3:13181955 | 3 | 13181955 | 13182047 | 93   | 5   | 15 | CGAAAAGGGG |
| CGAAAAGGGGAGATA                                                             |                        |   |          |          |      |     |    |            |
| UNSB01.fasta                                                                | Cele-UNSB01_3:13182222 | 3 | 13182222 | 13182299 | 78   | 5   | 15 | TCCCCTTTTC |
| TCCCCTTTTCGTATC                                                             |                        |   |          |          |      |     |    |            |
| UNSB01.fasta                                                                | Cele-UNSB01_3:13188476 | 3 | 13188476 | 13189044 | 569  | 13  | 35 | TGCCGGAATT |
| TGCCGGAATTTAGAAATTTTCGACAAAGTGGCAAAT                                        |                        |   |          |          |      |     |    |            |
| UNSB01.fasta                                                                | Cele-UNSB01_3:13248196 | 3 | 13248196 | 13248346 | 151  | 9   | 12 | TAAGCCTAAG |
| TGAGCCTAAGCA                                                                |                        |   |          |          |      |     |    |            |
| UNSB01.fasta                                                                | Cele-UNSB01_3:13289132 | 3 | 13289132 | 13289912 | 781  | 10  | 78 | CGAAGTTGCT |
| CGCAGTTGCTGGTCCAGAGATCACAACAGGCGGATTGGCGGCATAACCTGAGCAACGGTAGTGTCATTGTTCTTC |                        |   |          |          |      |     |    |            |
| UNSB01.fasta                                                                | Cele-UNSB01_3:13290888 | 3 | 13290888 | 13291020 | 133  | 7   | 12 | CGCGACACGC |
| CGCGACACGCAA                                                                |                        |   |          |          |      |     |    |            |
| UNSB01.fasta                                                                | Cele-UNSB01_3:13335994 | 3 | 13335994 | 13337798 | 1805 | 147 | 10 | GCTACCGCCC |
| GCTACCGCCC                                                                  |                        |   |          |          |      |     |    |            |
| UNSB01.fasta                                                                | Cele-UNSB01_3:13409998 | 3 | 13409998 | 13411238 | 1241 | 25  | 43 | CGGAAATTTT |
| CGGAAATTTTCAATTCGGCAACTTGCCAGTTTGCCGGTTTGC                                  |                        |   |          |          |      |     |    |            |

|                                                                                                       |                        |   |          |          |      |     |     |             |
|-------------------------------------------------------------------------------------------------------|------------------------|---|----------|----------|------|-----|-----|-------------|
| UNSB01.fasta                                                                                          | Cele-UNSB01_3:13483516 | 3 | 13483516 | 13483661 | 146  | 5   | 31  | CCAAAAATGA  |
| CCAAAAATGACTGAAATTAGTCAAAAATTGG                                                                       |                        |   |          |          |      |     |     |             |
| UNSB01.fasta                                                                                          | Cele-UNSB01_3:13559329 | 3 | 13559329 | 13561136 | 1808 | 95  | 19  | AAAAATAGAT  |
| AAAAATAGATTGGCATA CG                                                                                  |                        |   |          |          |      |     |     |             |
| UNSB01.fasta                                                                                          | Cele-UNSB01_3:13583922 | 3 | 13583922 | 13584205 | 284  | 8   | 30  | TTTCAGGCCA  |
| TTTCAGGCCAATTTTCGGTCAATTTTGGACA                                                                       |                        |   |          |          |      |     |     |             |
| UNSB01.fasta                                                                                          | Cele-UNSB01_3:13762939 | 3 | 13762939 | 13765339 | 2401 | 60  | 40  | ATTTTCTCTAG |
| ATTTTCTAGAAAGTTCTGGAACATTCCAGAATTTTCCCA                                                               |                        |   |          |          |      |     |     |             |
| UNSB01.fasta                                                                                          | Cele-UNSB01_3:13765752 | 3 | 13765752 | 13765977 | 226  | 15  | 15  | CCACGATGGG  |
| CCACGATGGGTCTCA                                                                                       |                        |   |          |          |      |     |     |             |
| UNSB01.fasta                                                                                          | Cele-UNSB01_3:13900788 | 3 | 13900788 | 13900959 | 172  | 7   | 24  | AAGAAGGATG  |
| AAGAAAGATGCCGAAGAGAAGAAG                                                                              |                        |   |          |          |      |     |     |             |
| UNSB01.fasta                                                                                          | Cele-UNSB01_3:14059760 | 3 | 14059760 | 14060650 | 891  | 57  | 15  | TCGTGGTGAG  |
| TCGTGGTGAGACCCA                                                                                       |                        |   |          |          |      |     |     |             |
| UNSB01.fasta                                                                                          | Cele-UNSB01_3:14063373 | 3 | 14063373 | 14064273 | 901  | 60  | 15  | TCGTGGTGAG  |
| TCGTGGTGAGACCCA                                                                                       |                        |   |          |          |      |     |     |             |
| UNSB01.fasta                                                                                          | Cele-UNSB01_4:1        | 4 | 1        | 5637     | 5637 | 464 | 12  | AAGCCTAAGC  |
| AAGCCTAAGCCT                                                                                          |                        |   |          |          |      |     |     |             |
| UNSB01.fasta                                                                                          | Cele-UNSB01_4:125359   | 4 | 125359   | 125607   | 249  | 13  | 19  | TGGTTGAGGC  |
| TGGTTGAGGCTCTCTATTT                                                                                   |                        |   |          |          |      |     |     |             |
| UNSB01.fasta                                                                                          | Cele-UNSB01_4:128195   | 4 | 128195   | 129066   | 872  | 28  | 19  | TTGGTTGAGG  |
| TTGGTTGAGGCTCAAAATT                                                                                   |                        |   |          |          |      |     |     |             |
| UNSB01.fasta                                                                                          | Cele-UNSB01_4:129890   | 4 | 129890   | 130903   | 1014 | 21  | 22  | TTGGTTGAGG  |
| TTGGTTGAGGCTCTCTGGATT                                                                                 |                        |   |          |          |      |     |     |             |
| UNSB01.fasta                                                                                          | Cele-UNSB01_4:160082   | 4 | 160082   | 160208   | 127  | 8   | 14  | CCTAAGCCTA  |
| CCTAAGCCTAAGGT                                                                                        |                        |   |          |          |      |     |     |             |
| UNSB01.fasta                                                                                          | Cele-UNSB01_4:186112   | 4 | 186112   | 186245   | 134  | 7   | 19  | CCTCAACCAA  |
| CCTCAACCAAATCTGAG                                                                                     |                        |   |          |          |      |     |     |             |
| UNSB01.fasta                                                                                          | Cele-UNSB01_4:201016   | 4 | 201016   | 202120   | 1105 | 53  | 20  | CTCAACCAAA  |
| CTCAACCAAAATCCTTAGC                                                                                   |                        |   |          |          |      |     |     |             |
| UNSB01.fasta                                                                                          | Cele-UNSB01_4:221202   | 4 | 221202   | 221862   | 661  | 32  | 20  | CTCAGCCTCA  |
| CTCAGCCTCAATCAAAAATT                                                                                  |                        |   |          |          |      |     |     |             |
| UNSB01.fasta                                                                                          | Cele-UNSB01_4:236013   | 4 | 236013   | 237239   | 1227 | 63  | 18  | CTCAACCAAA  |
| CTCAACCAAATCTTAGC                                                                                     |                        |   |          |          |      |     |     |             |
| UNSB01.fasta                                                                                          | Cele-UNSB01_4:242271   | 4 | 242271   | 242555   | 285  | 12  | 22  | TGAGGCTCTC  |
| TGAGGCTCTCTAGATTTTTGGT                                                                                |                        |   |          |          |      |     |     |             |
| UNSB01.fasta                                                                                          | Cele-UNSB01_4:244645   | 4 | 244645   | 245490   | 846  | 8   | 18  | AGCCTCAACC  |
| AGCCTCAACCAAATCTT                                                                                     |                        |   |          |          |      |     |     |             |
| UNSB01.fasta                                                                                          | Cele-UNSB01_4:286805   | 4 | 286805   | 287284   | 480  | 13  | 37  | TTGGCGGGAA  |
| TTGGCGGGAATTCAAAATTTAATTTTTGAACATATT                                                                  |                        |   |          |          |      |     |     |             |
| UNSB01.fasta                                                                                          | Cele-UNSB01_4:287372   | 4 | 287372   | 287852   | 481  | 32  | 15  | TCGTGGTGAG  |
| TCGTGGAGAGACCCT                                                                                       |                        |   |          |          |      |     |     |             |
| UNSB01.fasta                                                                                          | Cele-UNSB01_4:355820   | 4 | 355820   | 356311   | 492  | 11  | 45  | GAAGGATCAG  |
| GAAGGATCAGACCATCAGGAGGTACCCTTACGATCCTTCTTATCT                                                         |                        |   |          |          |      |     |     |             |
| UNSB01.fasta                                                                                          | Cele-UNSB01_4:388221   | 4 | 388221   | 388493   | 273  | 8   | 34  | TTGCAGGAAA  |
| TTGCAGGAAATTTCAATTCAGCCGATTGCGCGT                                                                     |                        |   |          |          |      |     |     |             |
| UNSB01.fasta                                                                                          | Cele-UNSB01_4:391568   | 4 | 391568   | 391630   | 63   | 4   | 15  | TCCCCTTTTC  |
| TCCCCTTTTCGCAGA                                                                                       |                        |   |          |          |      |     |     |             |
| UNSB01.fasta                                                                                          | Cele-UNSB01_4:552425   | 4 | 552425   | 552551   | 127  | 9   | 12  | TAGGCTTAGG  |
| TAGGCTAAGGCT                                                                                          |                        |   |          |          |      |     |     |             |
| UNSB01.fasta                                                                                          | Cele-UNSB01_4:600866   | 4 | 600866   | 601084   | 219  | 10  | 16  | AGGCATGTAG  |
| AGGCATGTAGGCATGT                                                                                      |                        |   |          |          |      |     |     |             |
| UNSB01.fasta                                                                                          | Cele-UNSB01_4:634851   | 4 | 634851   | 634943   | 93   | 6   | 15  | TCCCCTTTTC  |
| TCCCCTTTTCGTATC                                                                                       |                        |   |          |          |      |     |     |             |
| UNSB01.fasta                                                                                          | Cele-UNSB01_4:646705   | 4 | 646705   | 646786   | 82   | 4   | 15  | TAAGCCTAAG  |
| TAAGCCTAAGCCCAC                                                                                       |                        |   |          |          |      |     |     |             |
| UNSB01.fasta                                                                                          | Cele-UNSB01_4:695215   | 4 | 695215   | 705007   | 9793 | 96  | 102 | TGATATGTCTG |
| TGATATGTCTGACGATTGATAGTTTGGGAATCAAGAGAATCAGTTGGACGATCAATTCATCTTTGGGTCTTGCTGCAGCATATCTTTCTCCAGTACCACCT |                        |   |          |          |      |     |     |             |

|                                                                                                       |                       |   |         |         |      |    |     |             |
|-------------------------------------------------------------------------------------------------------|-----------------------|---|---------|---------|------|----|-----|-------------|
| UNSB01.fasta                                                                                          | Cele-UNSB01_4:782171  | 4 | 782171  | 782295  | 125  | 4  | 31  | CAAAAAATCGG |
| CAAAAAATCGGGAATTTTTCACAAAAAATGT                                                                       |                       |   |         |         |      |    |     |             |
| UNSB01.fasta                                                                                          | Cele-UNSB01_4:984710  | 4 | 984710  | 985413  | 704  | 35 | 19  | CAATAATTTTC |
| CAATAATTTTCATAAAAAAT                                                                                  |                       |   |         |         |      |    |     |             |
| UNSB01.fasta                                                                                          | Cele-UNSB01_4:1076311 | 4 | 1076311 | 1076365 | 55   | 4  | 12  | AGCCTAAGCC  |
| AGCCTAAGCCTA                                                                                          |                       |   |         |         |      |    |     |             |
| UNSB01.fasta                                                                                          | Cele-UNSB01_4:1078257 | 4 | 1078257 | 1078305 | 49   | 4  | 12  | AGGCTTAGGC  |
| AGGCTTAGGCTT                                                                                          |                       |   |         |         |      |    |     |             |
| UNSB01.fasta                                                                                          | Cele-UNSB01_4:1160688 | 4 | 1160688 | 1160967 | 280  | 7  | 40  | ATTTTTCTAG  |
| ATTTTTCTAGAAAGTTCTGGAACATTTTCAGACTTTTCCCA                                                             |                       |   |         |         |      |    |     |             |
| UNSB01.fasta                                                                                          | Cele-UNSB01_4:1160589 | 4 | 1160589 | 1161121 | 533  | 4  | 35  | AAAATATTTT  |
| AAAATATTTTTTCACAGAAAATTTAAATTTCCCTCC                                                                  |                       |   |         |         |      |    |     |             |
| UNSB01.fasta                                                                                          | Cele-UNSB01_4:1161180 | 4 | 1161180 | 1161420 | 241  | 16 | 15  | GGTCTCACCA  |
| GGTCTCACACGATG                                                                                        |                       |   |         |         |      |    |     |             |
| UNSB01.fasta                                                                                          | Cele-UNSB01_4:1160701 | 4 | 1160701 | 1161595 | 895  | 10 | 40  | GTTCTGGAAC  |
| GTTCTGGAACATTTTCAGACTTTTCCCAATTTTCTAGAAA                                                              |                       |   |         |         |      |    |     |             |
| UNSB01.fasta                                                                                          | Cele-UNSB01_4:1161685 | 4 | 1161685 | 1161942 | 258  | 8  | 11  | GTACTCCTAC  |
| GTAATCCTACC                                                                                           |                       |   |         |         |      |    |     |             |
| UNSB01.fasta                                                                                          | Cele-UNSB01_4:1309063 | 4 | 1309063 | 1309423 | 361  | 9  | 36  | TTATTTTCTG  |
| TTATTTTCTGACAAATTGCCGTTTGCCGGAAATTT                                                                   |                       |   |         |         |      |    |     |             |
| UNSB01.fasta                                                                                          | Cele-UNSB01_4:1313914 | 4 | 1313914 | 1314237 | 324  | 8  | 36  | TTTGCCGGAA  |
| TTTGTCGGAAATTTTATTTTCTGACAAATTGCCGG                                                                   |                       |   |         |         |      |    |     |             |
| UNSB01.fasta                                                                                          | Cele-UNSB01_4:1358775 | 4 | 1358775 | 1359527 | 753  | 22 | 34  | ATTTCCCGCC  |
| ATTTCCCGCCAAAATTTTTCAGTGAATTTGA                                                                       |                       |   |         |         |      |    |     |             |
| UNSB01.fasta                                                                                          | Cele-UNSB01_4:1359612 | 4 | 1359612 | 1359777 | 166  | 11 | 15  | CCACGATGGG  |
| CCACGATGGGTCTCG                                                                                       |                       |   |         |         |      |    |     |             |
| UNSB01.fasta                                                                                          | Cele-UNSB01_4:1362949 | 4 | 1362949 | 1363282 | 334  | 9  | 34  | ATTGCCGGAA  |
| ATTGCCGGAAATTCAAATTCCTAGCAAATCGGCAA                                                                   |                       |   |         |         |      |    |     |             |
| UNSB01.fasta                                                                                          | Cele-UNSB01_4:1370044 | 4 | 1370044 | 1370460 | 417  | 8  | 12  | TAGGCTTAGG  |
| TAGGCTTAGGCG                                                                                          |                       |   |         |         |      |    |     |             |
| UNSB01.fasta                                                                                          | Cele-UNSB01_4:1429332 | 4 | 1429332 | 1429629 | 298  | 15 | 21  | AAAATTGACT  |
| AAAATCGACTAAAAATCGTCA                                                                                 |                       |   |         |         |      |    |     |             |
| UNSB01.fasta                                                                                          | Cele-UNSB01_4:1444044 | 4 | 1444044 | 1444098 | 55   | 4  | 12  | CATAGGCATA  |
| CATAGGCATAGA                                                                                          |                       |   |         |         |      |    |     |             |
| UNSB01.fasta                                                                                          | Cele-UNSB01_4:1452742 | 4 | 1452742 | 1452796 | 55   | 4  | 12  | TATATGTATA  |
| TATATGTATATG                                                                                          |                       |   |         |         |      |    |     |             |
| UNSB01.fasta                                                                                          | Cele-UNSB01_4:1454445 | 4 | 1454445 | 1454610 | 166  | 11 | 15  | AGACCCATCG  |
| AGACCCATCGTGGTG                                                                                       |                       |   |         |         |      |    |     |             |
| UNSB01.fasta                                                                                          | Cele-UNSB01_4:1461281 | 4 | 1461281 | 1461373 | 93   | 6  | 15  | TCCCCTTTTC  |
| TCCCCTTTTCGTATC                                                                                       |                       |   |         |         |      |    |     |             |
| UNSB01.fasta                                                                                          | Cele-UNSB01_4:1490085 | 4 | 1490085 | 1491772 | 1688 | 46 | 35  | AAAAAATTTT  |
| AAAAAATTTTGGCGGGAAATTCAAATTTTCAGTGA                                                                   |                       |   |         |         |      |    |     |             |
| UNSB01.fasta                                                                                          | Cele-UNSB01_4:1491894 | 4 | 1491894 | 1492067 | 174  | 5  | 35  | GAAAATTTGA  |
| GAAAATTTGAATTTCCCGCCAAAATTTTTCAGT                                                                     |                       |   |         |         |      |    |     |             |
| UNSB01.fasta                                                                                          | Cele-UNSB01_4:1492099 | 4 | 1492099 | 1492204 | 106  | 7  | 15  | CTCACCACGA  |
| CTCACCACGATGGGT                                                                                       |                       |   |         |         |      |    |     |             |
| UNSB01.fasta                                                                                          | Cele-UNSB01_4:1508767 | 4 | 1508767 | 1509123 | 357  | 5  | 12  | AGGCTTAGGC  |
| AGGCTTAGGCCT                                                                                          |                       |   |         |         |      |    |     |             |
| UNSB01.fasta                                                                                          | Cele-UNSB01_4:1530750 | 4 | 1530750 | 1530982 | 233  | 8  | 29  | CCACCCGGGA  |
| CCACCCGGGAGGCGTCGGCTGCTCTAAGC                                                                         |                       |   |         |         |      |    |     |             |
| UNSB01.fasta                                                                                          | Cele-UNSB01_4:1558589 | 4 | 1558589 | 1558964 | 376  | 4  | 94  | TCCCATTGAT  |
| TCCCATTGATTTGTCTACATAGGGCATTGAAAAGCACCCAATATTAGAGAACAGAAGATTTTGAGAATTACTGCCTTCAGAAATTGATGATTT         |                       |   |         |         |      |    |     |             |
| UNSB01.fasta                                                                                          | Cele-UNSB01_4:1580035 | 4 | 1580035 | 1580182 | 148  | 7  | 21  | CCATAGGTGG  |
| CCATAGGTGGATGATCAGATA                                                                                 |                       |   |         |         |      |    |     |             |
| UNSB01.fasta                                                                                          | Cele-UNSB01_4:1584655 | 4 | 1584655 | 1585480 | 826  | 7  | 101 | TTGATTTTTTC |
| TTGATTTTTTCGTCTTTGAAGGGATATTGGTTTCGGGGTAGTGGGCGGATATGGTCGGGGTACTGTAGGTATACGGTAGGGTTACTGTAGTTTTGGAAATT |                       |   |         |         |      |    |     |             |
| UNSB01.fasta                                                                                          | Cele-UNSB01_4:1639262 | 4 | 1639262 | 1639353 | 92   | 6  | 14  | ACTACACACT  |
| ACTACACACTACAC                                                                                        |                       |   |         |         |      |    |     |             |

|                                                                              |                       |   |         |         |      |     |    |             |
|------------------------------------------------------------------------------|-----------------------|---|---------|---------|------|-----|----|-------------|
| UNSB01.fasta                                                                 | Cele-UNSB01_4:1643155 | 4 | 1643155 | 1643244 | 90   | 6   | 12 | TTAGGCTTAG  |
| TTAGGCTTCGGC                                                                 |                       |   |         |         |      |     |    |             |
| UNSB01.fasta                                                                 | Cele-UNSB01_4:1647487 | 4 | 1647487 | 1647595 | 109  | 9   | 12 | CTTAAGCTTA  |
| CTTAAGCTTAGG                                                                 |                       |   |         |         |      |     |    |             |
| UNSB01.fasta                                                                 | Cele-UNSB01_4:1654144 | 4 | 1654144 | 1654247 | 104  | 5   | 23 | ATTTAATTAA  |
| ATTTATTTAATTAATTAATATTT                                                      |                       |   |         |         |      |     |    |             |
| UNSB01.fasta                                                                 | Cele-UNSB01_4:1669669 | 4 | 1669669 | 1669879 | 211  | 6   | 35 | ATTTCGGCA   |
| ATTTCGGCAAATCGGCAATATGCCAAAAATGGAT                                           |                       |   |         |         |      |     |    |             |
| UNSB01.fasta                                                                 | Cele-UNSB01_4:1695920 | 4 | 1695920 | 1696142 | 223  | 6   | 37 | CGCCAAAATG  |
| CGCCAAAATGATTCCAAAAATTAAATTTGAATTCC                                          |                       |   |         |         |      |     |    |             |
| UNSB01.fasta                                                                 | Cele-UNSB01_4:1703835 | 4 | 1703835 | 1704045 | 211  | 11  | 12 | CTAAGCCTAA  |
| CTAAGCCTAATA                                                                 |                       |   |         |         |      |     |    |             |
| UNSB01.fasta                                                                 | Cele-UNSB01_4:1729821 | 4 | 1729821 | 1729883 | 63   | 4   | 15 | CGAAAAGGGG  |
| CGAAAAGGGGATCTG                                                              |                       |   |         |         |      |     |    |             |
| UNSB01.fasta                                                                 | Cele-UNSB01_4:1755267 | 4 | 1755267 | 1755667 | 401  | 20  | 20 | CAGAAAAATC  |
| CAGAAAAATCAATAAATTCCT                                                        |                       |   |         |         |      |     |    |             |
| UNSB01.fasta                                                                 | Cele-UNSB01_4:1766949 | 4 | 1766949 | 1767039 | 91   | 5   | 12 | TAAGCCTAAG  |
| TAAGCCTAAGAC                                                                 |                       |   |         |         |      |     |    |             |
| UNSB01.fasta                                                                 | Cele-UNSB01_4:1777357 | 4 | 1777357 | 1777453 | 97   | 5   | 16 | CACGTAGGCA  |
| CACGTAAGCACGTAGG                                                             |                       |   |         |         |      |     |    |             |
| UNSB01.fasta                                                                 | Cele-UNSB01_4:1800043 | 4 | 1800043 | 1800133 | 91   | 7   | 12 | TTAGGATTAG  |
| TTAGGATTAGGA                                                                 |                       |   |         |         |      |     |    |             |
| UNSB01.fasta                                                                 | Cele-UNSB01_4:1802551 | 4 | 1802551 | 1803063 | 513  | 30  | 16 | TAGGCACGTA  |
| TAGGTACGTAGGCACG                                                             |                       |   |         |         |      |     |    |             |
| UNSB01.fasta                                                                 | Cele-UNSB01_4:1866819 | 4 | 1866819 | 1867315 | 497  | 18  | 21 | TGTCGATTTA  |
| TGTCGATTTACGGGGTTTCTAG                                                       |                       |   |         |         |      |     |    |             |
| UNSB01.fasta                                                                 | Cele-UNSB01_4:1908625 | 4 | 1908625 | 1908709 | 85   | 5   | 12 | TAAGCCTAAG  |
| TAAGTCTAAGCT                                                                 |                       |   |         |         |      |     |    |             |
| UNSB01.fasta                                                                 | Cele-UNSB01_4:1946817 | 4 | 1946817 | 1947132 | 316  | 8   | 35 | GAAATTTTCA  |
| GAAATTTTCAATTCCGGCAGTTTGCCGATTTGCCG                                          |                       |   |         |         |      |     |    |             |
| UNSB01.fasta                                                                 | Cele-UNSB01_4:1949645 | 4 | 1949645 | 1950620 | 976  | 28  | 35 | CATTTTCGCC  |
| CATTTTCGCCGAATTGCCGATTTGCCGGAAATTTT                                          |                       |   |         |         |      |     |    |             |
| UNSB01.fasta                                                                 | Cele-UNSB01_4:1966969 | 4 | 1966969 | 1971964 | 4996 | 213 | 21 | GTAAATCTAC  |
| GTAAATCTACAAGAAACCCCC                                                        |                       |   |         |         |      |     |    |             |
| UNSB01.fasta                                                                 | Cele-UNSB01_4:1985632 | 4 | 1985632 | 1987358 | 1727 | 15  | 80 | AATTTCTCAA  |
| AATTTCTCAATAGCGCGCTTGCAACATCCGAACGGCGCAAATTTGAGTTTTTGCCATAAAATAACGAAAATCGGCA |                       |   |         |         |      |     |    |             |
| UNSB01.fasta                                                                 | Cele-UNSB01_4:2119001 | 4 | 2119001 | 2119076 | 76   | 5   | 15 | GGGTCTCACC  |
| GGGTCTCGCCACGAT                                                              |                       |   |         |         |      |     |    |             |
| UNSB01.fasta                                                                 | Cele-UNSB01_4:2158460 | 4 | 2158460 | 2158710 | 251  | 6   | 40 | TTCCAGAATT  |
| TTCCAGAATTTTCTCGAATATTTCCAGAAGCTTCTAGAACAA                                   |                       |   |         |         |      |     |    |             |
| UNSB01.fasta                                                                 | Cele-UNSB01_4:2158825 | 4 | 2158825 | 2158968 | 144  | 5   | 11 | CTACAGTACC  |
| CTACAGTACTA                                                                  |                       |   |         |         |      |     |    |             |
| UNSB01.fasta                                                                 | Cele-UNSB01_4:2163715 | 4 | 2163715 | 2164250 | 536  | 8   | 43 | TTGCCGGAAAA |
| TTGCCGGAAATTTTCAATCGCGCATTTTGCCGTTTGTCTCAT                                   |                       |   |         |         |      |     |    |             |
| UNSB01.fasta                                                                 | Cele-UNSB01_4:2179058 | 4 | 2179058 | 2179920 | 863  | 38  | 21 | GATTTACGGG  |
| GATTTACGGGATGAAAAATGTG                                                       |                       |   |         |         |      |     |    |             |
| UNSB01.fasta                                                                 | Cele-UNSB01_4:2205280 | 4 | 2205280 | 2205605 | 326  | 13  | 21 | AAAATAGCTT  |
| AAAATAGCTGAAAATTCACTA                                                        |                       |   |         |         |      |     |    |             |
| UNSB01.fasta                                                                 | Cele-UNSB01_4:2267683 | 4 | 2267683 | 2267908 | 226  | 15  | 15 | CGATGGGTCT  |
| CGATGGGTCTCACCA                                                              |                       |   |         |         |      |     |    |             |
| UNSB01.fasta                                                                 | Cele-UNSB01_4:2268162 | 4 | 2268162 | 2268293 | 132  | 4   | 11 | GTACTCCTAC  |
| GTAATCCTACC                                                                  |                       |   |         |         |      |     |    |             |
| UNSB01.fasta                                                                 | Cele-UNSB01_4:2419217 | 4 | 2419217 | 2421562 | 2346 | 23  | 70 | AAAAATCGAT  |
| AAAAATCGATGTTTTGAAGTTTTTCTCAATAGAGCGCACTTTCAACAGCGAGAAATTGAATTTTCCACC        |                       |   |         |         |      |     |    |             |
| UNSB01.fasta                                                                 | Cele-UNSB01_4:2422782 | 4 | 2422782 | 2423615 |      |     |    |             |

|                                                                                                                                                       |                       |   |         |         |       |      |     |            |
|-------------------------------------------------------------------------------------------------------------------------------------------------------|-----------------------|---|---------|---------|-------|------|-----|------------|
| UNSB01.fasta                                                                                                                                          | Cele-UNSB01_4:2599504 | 4 | 2599504 | 2602273 | 2770  | 17   | 164 | CTTTTTTCTT |
| CTTTTTTCTTTTATAAACTGTTTAGCATAGTCGAATATACCAGAAAAATACCAAACAAAGTATGCTATCTTGTACGAAAGATTATTTTAAAAAATTGAGAAAATGCATCTAAAGCGGTTTTTTTTTCAAAAATTCAAAGTACCGGAAAA |                       |   |         |         |       |      |     |            |
| TCATAAAAAGTGCTT                                                                                                                                       |                       |   |         |         |       |      |     |            |
| UNSB01.fasta                                                                                                                                          | Cele-UNSB01_4:2676914 | 4 | 2676914 | 2677180 | 267   | 11   | 19  | CGCCAAGTAT |
| CGCCAAGTGTCGGAATA                                                                                                                                     |                       |   |         |         |       |      |     |            |
| UNSB01.fasta                                                                                                                                          | Cele-UNSB01_4:2701520 | 4 | 2701520 | 2702341 | 822   | 4    | 175 | AACTTGTGAC |
| AACTTGTGACGGTGGGTATGGATTTTATGCACATATTTGTTTGAAATAGTCTACCAAGTAAACTGGTGAAGTTTCAAAACTTTGTGGATCTAGTTTTTGAAAAAGTTCAAATTGCGCCAATTTTGACCAATTTTGGTGGTTTTCT     |                       |   |         |         |       |      |     |            |
| GAGCTAAAATTGAAAAGTTGGGAATG                                                                                                                            |                       |   |         |         |       |      |     |            |
| UNSB01.fasta                                                                                                                                          | Cele-UNSB01_4:2721172 | 4 | 2721172 | 2721362 | 191   | 5    | 40  | GAATTTTCCA |
| GAATTTTTCAGAAAGTTCTAGAACATTCAGAAATTTTTC                                                                                                               |                       |   |         |         |       |      |     |            |
| UNSB01.fasta                                                                                                                                          | Cele-UNSB01_4:2728247 | 4 | 2728247 | 2729274 | 1028  | 42   | 21  | TTTGGATTTT |
| TTCGGATTTTGTAGGCTTAAAA                                                                                                                                |                       |   |         |         |       |      |     |            |
| UNSB01.fasta                                                                                                                                          | Cele-UNSB01_4:2780831 | 4 | 2780831 | 2781210 | 380   | 12   | 11  | TACTGTAGGA |
| TACTGTAGAGA                                                                                                                                           |                       |   |         |         |       |      |     |            |
| UNSB01.fasta                                                                                                                                          | Cele-UNSB01_4:2843789 | 4 | 2843789 | 2844131 | 343   | 4    | 87  | TGAAGTCGTA |
| TGAAGTCGTAGGATTCTGTGTAGCGACTGGTGTGTTTACTCTGTGAAGGGGACGTGGCTTCTTCTGTTGAGTCAGGCTTCTGAGG                                                                 |                       |   |         |         |       |      |     |            |
| UNSB01.fasta                                                                                                                                          | Cele-UNSB01_4:2889237 | 4 | 2889237 | 2889839 | 603   | 7    | 35  | TTTTCAATTC |
| TTTTCAATTCAAGCAATTTGCAGTTTGCCTGAAT                                                                                                                    |                       |   |         |         |       |      |     |            |
| UNSB01.fasta                                                                                                                                          | Cele-UNSB01_4:2892401 | 4 | 2892401 | 2892617 | 217   | 5    | 24  | GCTTCTGGAG |
| GCTTCTGGAGCCACAGGTTATCCA                                                                                                                              |                       |   |         |         |       |      |     |            |
| UNSB01.fasta                                                                                                                                          | Cele-UNSB01_4:2898426 | 4 | 2898426 | 2898868 | 443   | 12   | 19  | ACCTAGGCAT |
| ACCTATGCATAAGGCAGGC                                                                                                                                   |                       |   |         |         |       |      |     |            |
| UNSB01.fasta                                                                                                                                          | Cele-UNSB01_4:2909681 | 4 | 2909681 | 2910188 | 508   | 14   | 35  | ATTCCGGCAA |
| ATTCCGGCAAATTACCGATTTGCCGAAAATTTTCA                                                                                                                   |                       |   |         |         |       |      |     |            |
| UNSB01.fasta                                                                                                                                          | Cele-UNSB01_4:2933784 | 4 | 2933784 | 2933839 | 56    | 5    | 11  | TTGTTTACAA |
| TTGTTTACAAG                                                                                                                                           |                       |   |         |         |       |      |     |            |
| UNSB01.fasta                                                                                                                                          | Cele-UNSB01_4:2990271 | 4 | 2990271 | 2990613 | 343   | 19   | 16  | TAGGCATGTA |
| TAGGCATGTAGGAATG                                                                                                                                      |                       |   |         |         |       |      |     |            |
| UNSB01.fasta                                                                                                                                          | Cele-UNSB01_4:3002005 | 4 | 3002005 | 3002220 | 216   | 4    | 43  | TTTGCCGGAA |
| TTTGCCGGAATTGAAAACCTACCGGCAAATCTGCAAACTGGAAA                                                                                                          |                       |   |         |         |       |      |     |            |
| UNSB01.fasta                                                                                                                                          | Cele-UNSB01_4:3004201 | 4 | 3004201 | 3004345 | 145   | 6    | 24  | GCGGCCGACA |
| GCGGCCGACACCTTACGGGTTGTA                                                                                                                              |                       |   |         |         |       |      |     |            |
| UNSB01.fasta                                                                                                                                          | Cele-UNSB01_4:3018891 | 4 | 3018891 | 3018971 | 81    | 4    | 16  | AGGTAGGAAG |
| AGATAGGAAGGTAGGA                                                                                                                                      |                       |   |         |         |       |      |     |            |
| UNSB01.fasta                                                                                                                                          | Cele-UNSB01_4:3087838 | 4 | 3087838 | 3087930 | 93    | 6    | 15  | CGAAAAGGGG |
| CGAAAAGGGGATCTG                                                                                                                                       |                       |   |         |         |       |      |     |            |
| UNSB01.fasta                                                                                                                                          | Cele-UNSB01_4:3088105 | 4 | 3088105 | 3088197 | 93    | 6    | 15  | TCCCCTTTTC |
| TCCCCTTTTCGTATC                                                                                                                                       |                       |   |         |         |       |      |     |            |
| UNSB01.fasta                                                                                                                                          | Cele-UNSB01_4:3090317 | 4 | 3090317 | 3090467 | 151   | 8    | 15  | CACGATGGGT |
| CACGATGGGTCTCAT                                                                                                                                       |                       |   |         |         |       |      |     |            |
| UNSB01.fasta                                                                                                                                          | Cele-UNSB01_4:3135501 | 4 | 3135501 | 3135649 | 149   | 4    | 37  | TGGCGGGAAT |
| TGGCGGGAATTCAAATTTCAATTTTGTAGAACTCATT                                                                                                                 |                       |   |         |         |       |      |     |            |
| UNSB01.fasta                                                                                                                                          | Cele-UNSB01_4:3176916 | 4 | 3176916 | 3177039 | 124   | 7    | 12  | TAGGCTTAGG |
| TAGGCGTAGGCA                                                                                                                                          |                       |   |         |         |       |      |     |            |
| UNSB01.fasta                                                                                                                                          | Cele-UNSB01_4:3192518 | 4 | 3192518 | 3194426 | 1909  | 53   | 35  | CGGCAATTTG |
| CAGCAATTTGCCGATTGCGGAAATTTTTCAGTTC                                                                                                                    |                       |   |         |         |       |      |     |            |
| UNSB01.fasta                                                                                                                                          | Cele-UNSB01_4:3222029 | 4 | 3222029 | 3222419 | 391   | 5    | 16  | TACATGCCTA |
| TACATGCCTACATGCC                                                                                                                                      |                       |   |         |         |       |      |     |            |
| UNSB01.fasta                                                                                                                                          | Cele-UNSB01_4:3226485 | 4 | 3226485 | 3226669 | 185   | 11   | 16  | CATGCCTACA |
| CATGCCTACATACATA                                                                                                                                      |                       |   |         |         |       |      |     |            |
| UNSB01.fasta                                                                                                                                          | Cele-UNSB01_4:3230422 | 4 | 3230422 | 3232144 | 1723  | 67   | 16  | ATGCCTACAT |
| ATGCCTACATGGCTAG                                                                                                                                      |                       |   |         |         |       |      |     |            |
| UNSB01.fasta                                                                                                                                          | Cele-UNSB01_4:3232737 | 4 | 3232737 | 3232899 | 163   | 6    | 18  | CCTTCGCCTA |
| CCTTCGCCTACCTGCATG                                                                                                                                    |                       |   |         |         |       |      |     |            |
| UNSB01.fasta                                                                                                                                          | Cele-UNSB01_4:3243719 | 4 | 3243719 | 3271867 | 28149 | 1487 | 19  | CCTCACTCAA |
| CCTCACTCAAAATCCTCAG                                                                                                                                   |                       |   |         |         |       |      |     |            |
| UNSB01.fasta                                                                                                                                          | Cele-UNSB01_4:3274030 | 4 | 3274030 | 3274126 | 97    | 6    | 16  | AGGCATGTAG |
| AGGCATGTAGGCATGC                                                                                                                                      |                       |   |         |         |       |      |     |            |

|                                              |                       |   |         |         |      |     |    |             |
|----------------------------------------------|-----------------------|---|---------|---------|------|-----|----|-------------|
| UNSB01.fasta                                 | Cele-UNSB01_4:3353341 | 4 | 3353341 | 3353481 | 141  | 5   | 33 | CGGCATATGC  |
| CGGCATATGCCGTGAATTTTAAATCGGCATAA             |                       |   |         |         |      |     |    |             |
| UNSB01.fasta                                 | Cele-UNSB01_4:3371888 | 4 | 3371888 | 3372867 | 980  | 27  | 35 | AATCGGCAAG  |
| AATCGGCAAGTTACCGAAATTGAAAATTCCGGCA           |                       |   |         |         |      |     |    |             |
| UNSB01.fasta                                 | Cele-UNSB01_4:3428944 | 4 | 3428944 | 3430273 | 1330 | 24  | 45 | TCTGATCCTT  |
| TCTGATCCTTCAGCTCCAAGGATCAGAAGGGTACCTCCTGGTGA |                       |   |         |         |      |     |    |             |
| UNSB01.fasta                                 | Cele-UNSB01_4:3517707 | 4 | 3517707 | 3518097 | 391  | 27  | 12 | TAAGCCTAAG  |
| TAAGCCTAAGCT                                 |                       |   |         |         |      |     |    |             |
| UNSB01.fasta                                 | Cele-UNSB01_4:3630301 | 4 | 3630301 | 3630781 | 481  | 28  | 16 | TGCCTACATG  |
| TGCCTACATGCCCCACA                            |                       |   |         |         |      |     |    |             |
| UNSB01.fasta                                 | Cele-UNSB01_4:3670951 | 4 | 3670951 | 3671065 | 115  | 7   | 12 | TTAGGCTTAG  |
| TTAGGATTAGGA                                 |                       |   |         |         |      |     |    |             |
| UNSB01.fasta                                 | Cele-UNSB01_4:3714325 | 4 | 3714325 | 3715225 | 901  | 15  | 21 | TGTAGATTTA  |
| TGTAGATATACGGGAATCTTG                        |                       |   |         |         |      |     |    |             |
| UNSB01.fasta                                 | Cele-UNSB01_4:3733029 | 4 | 3733029 | 3733089 | 61   | 4   | 15 | TCGTGGTGAG  |
| TCGTGGTGAGACCCCT                             |                       |   |         |         |      |     |    |             |
| UNSB01.fasta                                 | Cele-UNSB01_4:3733495 | 4 | 3733495 | 3734015 | 521  | 15  | 40 | TTTCTAGAAA  |
| TTTCTAGAAAATTCGGGAAAACCTCTGGAATATTCCAGAAC    |                       |   |         |         |      |     |    |             |
| UNSB01.fasta                                 | Cele-UNSB01_4:3758727 | 4 | 3758727 | 3758973 | 247  | 6   | 41 | AAATTTTTAA  |
| AAATTTTTAACTAAAAGTGGGCGAAAATCATTCAAAAATTC    |                       |   |         |         |      |     |    |             |
| UNSB01.fasta                                 | Cele-UNSB01_4:3817232 | 4 | 3817232 | 3817391 | 160  | 5   | 21 | TAGTTTGTAG  |
| TAGTTTATAGTTCACAGTTTA                        |                       |   |         |         |      |     |    |             |
| UNSB01.fasta                                 | Cele-UNSB01_4:3888107 | 4 | 3888107 | 3888300 | 194  | 12  | 16 | TAGGCATGTA  |
| TAGGCATGTAGGCATG                             |                       |   |         |         |      |     |    |             |
| UNSB01.fasta                                 | Cele-UNSB01_4:3896416 | 4 | 3896416 | 3896737 | 322  | 5   | 18 | ATTAGTATTG  |
| ATTAGTATTGCCCTACCT                           |                       |   |         |         |      |     |    |             |
| UNSB01.fasta                                 | Cele-UNSB01_4:4053946 | 4 | 4053946 | 4054647 | 702  | 6   | 12 | TAAGCCTAAG  |
| TAAGCCTATGCC                                 |                       |   |         |         |      |     |    |             |
| UNSB01.fasta                                 | Cele-UNSB01_4:4229494 | 4 | 4229494 | 4229583 | 90   | 7   | 12 | GTTCGCTGTC  |
| GTTGCGTGTCGC                                 |                       |   |         |         |      |     |    |             |
| UNSB01.fasta                                 | Cele-UNSB01_4:4229497 | 4 | 4229497 | 4230359 | 863  | 71  | 12 | GCGTGTCGCG  |
| GCGTGTCGCGTT                                 |                       |   |         |         |      |     |    |             |
| UNSB01.fasta                                 | Cele-UNSB01_4:4261575 | 4 | 4261575 | 4261676 | 102  | 6   | 17 | GATGCCCCCT  |
| GATGCCCCCTCTGAACG                            |                       |   |         |         |      |     |    |             |
| UNSB01.fasta                                 | Cele-UNSB01_4:4368763 | 4 | 4368763 | 4369020 | 258  | 5   | 11 | GTA CTGTAGG |
| GTA CTGTAGGA                                 |                       |   |         |         |      |     |    |             |
| UNSB01.fasta                                 | Cele-UNSB01_4:4388126 | 4 | 4388126 | 4388633 | 508  | 13  | 11 | CTACAGTACT  |
| CTACAGTACTA                                  |                       |   |         |         |      |     |    |             |
| UNSB01.fasta                                 | Cele-UNSB01_4:4398109 | 4 | 4398109 | 4398181 | 73   | 4   | 18 | TTTTTTGATA  |
| TTTTTTGATAATTCTTGA                           |                       |   |         |         |      |     |    |             |
| UNSB01.fasta                                 | Cele-UNSB01_4:4418485 | 4 | 4418485 | 4418703 | 219  | 5   | 35 | TTCCGGCAAA  |
| TTCAGGCAAAATCGGCAAATTGCCGGAATTGAATAC         |                       |   |         |         |      |     |    |             |
| UNSB01.fasta                                 | Cele-UNSB01_4:4464716 | 4 | 4464716 | 4464793 | 78   | 5   | 15 | CGAAAAGGGG  |
| CGAAAAGGGGATCTG                              |                       |   |         |         |      |     |    |             |
| UNSB01.fasta                                 | Cele-UNSB01_4:4479166 | 4 | 4479166 | 4488089 | 8924 | 327 | 26 | GTCTAACTTT  |
| GTCTAACTTTGGAAATTCATCTAATG                   |                       |   |         |         |      |     |    |             |
| UNSB01.fasta                                 | Cele-UNSB01_4:4525521 | 4 | 4525521 | 4525683 | 163  | 12  | 12 | GCCTAAGCCT  |
| GCCTAAGACTAC                                 |                       |   |         |         |      |     |    |             |
| UNSB01.fasta                                 | Cele-UNSB01_4:4598852 | 4 | 4598852 | 4599551 | 700  | 6   | 11 | GCAGTAGGCA  |
| GCAGTAGGAAG                                  |                       |   |         |         |      |     |    |             |
| UNSB01.fasta                                 | Cele-UNSB01_4:4620647 | 4 | 4620647 | 4621153 | 507  | 13  | 11 | CTACAGTACT  |
| CTACAGTACTA                                  |                       |   |         |         |      |     |    |             |
| UNSB01.fasta                                 | Cele-UNSB01_4:4665165 | 4 | 4665165 | 4665209 | 45   | 4   | 11 | TGACAACTTT  |
| TGACAACTTTG                                  |                       |   |         |         |      |     |    |             |
| UNSB01.fasta                                 | Cele-UNSB01_4:4768182 | 4 | 4768182 | 4768259 | 78   | 5   | 15 | CGAAAAGGGG  |
| CGAAAAGGGGATCTG                              |                       |   |         |         |      |     |    |             |
| UNSB01.fasta                                 | Cele-UNSB01_4:4768434 | 4 | 4768434 | 4768526 | 93   | 6   | 15 | TCCCTTTTTC  |
| TCCCTTTTTCGTATC                              |                       |   |         |         |      |     |    |             |



|                                                                                        |                       |   |         |         |      |     |    |            |
|----------------------------------------------------------------------------------------|-----------------------|---|---------|---------|------|-----|----|------------|
| UNSB01.fasta                                                                           | Cele-UNSB01_4:4858228 | 4 | 4858228 | 4858874 | 647  | 17  | 35 | TTGCCGGAAA |
| TTGCCGGAAATTTTGGTTTCCGGCAAGTTCCGAT                                                     |                       |   |         |         |      |     |    |            |
| UNSB01.fasta                                                                           | Cele-UNSB01_4:4963981 | 4 | 4963981 | 4964546 | 566  | 18  | 15 | GAGACCCATC |
| GAGACCCGTCGTGGT                                                                        |                       |   |         |         |      |     |    |            |
| UNSB01.fasta                                                                           | Cele-UNSB01_4:4986658 | 4 | 4986658 | 4986858 | 201  | 5   | 40 | TTCTAGAAAG |
| TTCTAGAAAGTTCTGGAACATTCTAGAATTTTCTCGATTT                                               |                       |   |         |         |      |     |    |            |
| UNSB01.fasta                                                                           | Cele-UNSB01_4:4986914 | 4 | 4986914 | 4987437 | 524  | 15  | 35 | TTTTCAGAAA |
| TTTTCAGAAAATTAAAAATTCCCTCCAAAATATTT                                                    |                       |   |         |         |      |     |    |            |
| UNSB01.fasta                                                                           | Cele-UNSB01_4:4987504 | 4 | 4987504 | 4988044 | 541  | 32  | 15 | GGGTCTCACC |
| GGGTCTCACCACGAT                                                                        |                       |   |         |         |      |     |    |            |
| UNSB01.fasta                                                                           | Cele-UNSB01_4:4988071 | 4 | 4988071 | 4988281 | 211  | 14  | 15 | ACCCATCGTG |
| ACCCATCGTGGCGAG                                                                        |                       |   |         |         |      |     |    |            |
| UNSB01.fasta                                                                           | Cele-UNSB01_4:4987504 | 4 | 4987504 | 4989222 | 1719 | 80  | 15 | GGGTCTCACC |
| GGGTCTCACCACGAT                                                                        |                       |   |         |         |      |     |    |            |
| UNSB01.fasta                                                                           | Cele-UNSB01_4:4990413 | 4 | 4990413 | 4990623 | 211  | 6   | 35 | AATATTTTTT |
| AATATTTTTTTCAGAAAATTAAATTTCCCTCCAA                                                     |                       |   |         |         |      |     |    |            |
| UNSB01.fasta                                                                           | Cele-UNSB01_4:4990696 | 4 | 4990696 | 4991348 | 653  | 40  | 15 | GGGTCTCACC |
| GGGTCTCACCACGAT                                                                        |                       |   |         |         |      |     |    |            |
| UNSB01.fasta                                                                           | Cele-UNSB01_4:5061085 | 4 | 5061085 | 5061475 | 391  | 8   | 39 | CCAACTGGAG |
| CCAACTGGAGCCAGCCCTATGACGGCCTTGGAGGAGCA                                                 |                       |   |         |         |      |     |    |            |
| UNSB01.fasta                                                                           | Cele-UNSB01_4:5124505 | 4 | 5124505 | 5124705 | 201  | 12  | 16 | CTACGTGCCT |
| CTACGTGTCTACGTGC                                                                       |                       |   |         |         |      |     |    |            |
| UNSB01.fasta                                                                           | Cele-UNSB01_4:5337721 | 4 | 5337721 | 5338093 | 373  | 18  | 12 | AGAAGGAGGA |
| AGAAAGAGGAGA                                                                           |                       |   |         |         |      |     |    |            |
| UNSB01.fasta                                                                           | Cele-UNSB01_4:5363528 | 4 | 5363528 | 5363903 | 376  | 15  | 25 | TTTACTCTCT |
| TTTACTCTCTTGCTTCACAGAATAA                                                              |                       |   |         |         |      |     |    |            |
| UNSB01.fasta                                                                           | Cele-UNSB01_4:5366596 | 4 | 5366596 | 5366788 | 193  | 10  | 12 | TCCTCTTTCT |
| TCCTCTTTCTTC                                                                           |                       |   |         |         |      |     |    |            |
| UNSB01.fasta                                                                           | Cele-UNSB01_4:5521070 | 4 | 5521070 | 5521205 | 136  | 9   | 15 | CCACGATGGG |
| CCACGATGGGTCTCG                                                                        |                       |   |         |         |      |     |    |            |
| UNSB01.fasta                                                                           | Cele-UNSB01_4:5529418 | 4 | 5529418 | 5534698 | 5281 | 110 | 48 | TTGCCCGTAA |
| TTGCCTGTAATTTATATTTTCTGAAGATGAGCAATTCAATTTTGTAT                                        |                       |   |         |         |      |     |    |            |
| UNSB01.fasta                                                                           | Cele-UNSB01_4:5758139 | 4 | 5758139 | 5758194 | 56   | 5   | 11 | TCCACTGACC |
| TCCACTGACCA                                                                            |                       |   |         |         |      |     |    |            |
| UNSB01.fasta                                                                           | Cele-UNSB01_4:5945791 | 4 | 5945791 | 5945941 | 151  | 6   | 25 | CCAGAGAGTA |
| CCAGAGAGTAAAATATACTGGGAAG                                                              |                       |   |         |         |      |     |    |            |
| UNSB01.fasta                                                                           | Cele-UNSB01_4:6076861 | 4 | 6076861 | 6077186 | 326  | 6   | 55 | AAGAGTCCCC |
| AAGAGTCCCCACACACTGAAAGGTTTAAAGGAATTTTGGAGGATTCCTAGGGTT                                 |                       |   |         |         |      |     |    |            |
| UNSB01.fasta                                                                           | Cele-UNSB01_4:6158202 | 4 | 6158202 | 6158352 | 151  | 6   | 25 | TTTACTCTCT |
| TTTACTCTCTGGCTTCACAGTATAT                                                              |                       |   |         |         |      |     |    |            |
| UNSB01.fasta                                                                           | Cele-UNSB01_4:6277867 | 4 | 6277867 | 6278002 | 136  | 7   | 19 | ATTGACAGAC |
| ATTGACAGACGAAAAATAG                                                                    |                       |   |         |         |      |     |    |            |
| UNSB01.fasta                                                                           | Cele-UNSB01_4:6359332 | 4 | 6359332 | 6359386 | 55   | 4   | 13 | TTTCATTGTG |
| TTTCATTGTGAAT                                                                          |                       |   |         |         |      |     |    |            |
| UNSB01.fasta                                                                           | Cele-UNSB01_4:6425603 | 4 | 6425603 | 6430447 | 4845 | 192 | 25 | TTAGAGTAAA |
| TTAGAGTAAATAAATTAGCAGAACA                                                              |                       |   |         |         |      |     |    |            |
| UNSB01.fasta                                                                           | Cele-UNSB01_4:6539759 | 4 | 6539759 | 6539908 | 150  | 10  | 12 | CAGAATATAT |
| CAGAATATATTC                                                                           |                       |   |         |         |      |     |    |            |
| UNSB01.fasta                                                                           | Cele-UNSB01_4:6669007 | 4 | 6669007 | 6669090 | 84   | 4   | 22 | AAGCGGTAAC |
| AAGCGGTAACGTCGTCTATATA                                                                 |                       |   |         |         |      |     |    |            |
| UNSB01.fasta                                                                           | Cele-UNSB01_4:6734929 | 4 | 6734929 | 6735237 | 309  | 9   | 31 | CCCGCCAAAA |
| CCCGCCAAAATTTTGAAGAAATTCGGATT                                                          |                       |   |         |         |      |     |    |            |
| UNSB01.fasta                                                                           | Cele-UNSB01_4:6945378 | 4 | 6945378 | 6946401 | 1024 | 11  | 93 | TGCTTCTCGT |
| TGCTTCTCGTCCACCACCACCACCGAAGGGAACCTGGAACCCACCACCACCACTGGAGAACCACAGGATCTTTCTGCAGAAGGTAA |                       |   |         |         |      |     |    |            |
| UNSB01.fasta                                                                           | Cele-UNSB01_4:7151737 | 4 | 7151737 | 7153750 | 2014 | 178 | 11 | TGACAACTTC |
| TGACAACTTCA                                                                            |                       |   |         |         |      |     |    |            |
| UNSB01.fasta                                                                           | Cele-UNSB01_4:7464716 | 4 | 7464716 | 7464914 | 199  | 5   | 40 | TCCAGAATTT |
| TCCAGAATTTTCCCGATTTTCTAGAAAGTTCTGGAACAC                                                |                       |   |         |         |      |     |    |            |

|                                                                             |                        |   |          |          |       |     |    |            |
|-----------------------------------------------------------------------------|------------------------|---|----------|----------|-------|-----|----|------------|
| UNSB01.fasta                                                                | Cele-UNSB01_4:7464933  | 4 | 7464933  | 7465143  | 211   | 6   | 35 | CAGAAAATTT |
| CAGAAAATTTAAATTTCCCGCCAAAATATTTTCA                                          |                        |   |          |          |       |     |    |            |
| UNSB01.fasta                                                                | Cele-UNSB01_4:7464716  | 4 | 7464716  | 7465331  | 616   | 6   | 40 | TCCAGAATTT |
| TCCAGAATTTTCCCGATTTTCTAGAAAGTTCTGGAACAC                                     |                        |   |          |          |       |     |    |            |
| UNSB01.fasta                                                                | Cele-UNSB01_4:7715733  | 4 | 7715733  | 7715854  | 122   | 6   | 17 | CTCATTGCCT |
| CTCATTGACTACCCTTG                                                           |                        |   |          |          |       |     |    |            |
| UNSB01.fasta                                                                | Cele-UNSB01_4:7767635  | 4 | 7767635  | 7768760  | 1126  | 25  | 45 | AGCACCACCA |
| AGCACCACCATCAGGCGGACCACCAGGACTATTGATCCATCAGG                                |                        |   |          |          |       |     |    |            |
| UNSB01.fasta                                                                | Cele-UNSB01_4:8048486  | 4 | 8048486  | 8048578  | 93    | 6   | 15 | CGAAAAGGGG |
| CGAAAAGGGGATCTG                                                             |                        |   |          |          |       |     |    |            |
| UNSB01.fasta                                                                | Cele-UNSB01_4:8048753  | 4 | 8048753  | 8048845  | 93    | 6   | 15 | TCCCTTTTC  |
| TCCCTTTTCGTATC                                                              |                        |   |          |          |       |     |    |            |
| UNSB01.fasta                                                                | Cele-UNSB01_4:8107145  | 4 | 8107145  | 8107415  | 271   | 18  | 15 | CTCACCACGA |
| CTCACCACGATGGGT                                                             |                        |   |          |          |       |     |    |            |
| UNSB01.fasta                                                                | Cele-UNSB01_4:8289359  | 4 | 8289359  | 8289627  | 269   | 6   | 45 | TCTGATCCTT |
| TCTGATCCTTCAGCTCCGAAGGATCACATGGGCACCTTCTGATGA                               |                        |   |          |          |       |     |    |            |
| UNSB01.fasta                                                                | Cele-UNSB01_4:8500583  | 4 | 8500583  | 8501255  | 673   | 21  | 32 | TTTTACAGA  |
| TTTTACAGAAAATTTGAATTTCCCGCCAAAAT                                            |                        |   |          |          |       |     |    |            |
| UNSB01.fasta                                                                | Cele-UNSB01_4:8501471  | 4 | 8501471  | 8501871  | 401   | 10  | 40 | AGAAGGTTCT |
| AGAAGGTTCTGGAACATTCAGAAATTTCTCAAATTTTCC                                     |                        |   |          |          |       |     |    |            |
| UNSB01.fasta                                                                | Cele-UNSB01_4:8501476  | 4 | 8501476  | 8504168  | 2693  | 54  | 40 | GTTCTGGAAC |
| GTTCTGGAACATTCAGAAATTTCTCAAATTTTCCAGAAG                                     |                        |   |          |          |       |     |    |            |
| UNSB01.fasta                                                                | Cele-UNSB01_4:8504239  | 4 | 8504239  | 8504449  | 211   | 6   | 35 | GAAAATTTAA |
| GAAAATTTAAATTTCCACCAAATATTTTTC                                              |                        |   |          |          |       |     |    |            |
| UNSB01.fasta                                                                | Cele-UNSB01_4:8504495  | 4 | 8504495  | 8505035  | 541   | 35  | 15 | TCTCACCACG |
| TCTCACCACGATGGG                                                             |                        |   |          |          |       |     |    |            |
| UNSB01.fasta                                                                | Cele-UNSB01_4:8600392  | 4 | 8600392  | 8600896  | 505   | 13  | 11 | CTACAGTACT |
| CTACAGTACTA                                                                 |                        |   |          |          |       |     |    |            |
| UNSB01.fasta                                                                | Cele-UNSB01_4:8607400  | 4 | 8607400  | 8623699  | 16300 | 831 | 20 | ATACGATATA |
| ATACGATATAGCTATAAACA                                                        |                        |   |          |          |       |     |    |            |
| UNSB01.fasta                                                                | Cele-UNSB01_4:8831351  | 4 | 8831351  | 8831453  | 103   | 6   | 17 | TTCATTCCTG |
| TTCATTCCTGATTATT                                                            |                        |   |          |          |       |     |    |            |
| UNSB01.fasta                                                                | Cele-UNSB01_4:9041393  | 4 | 9041393  | 9041548  | 156   | 8   | 17 | AGGCAATGAG |
| AGGCAATGAGAAAGAGT                                                           |                        |   |          |          |       |     |    |            |
| UNSB01.fasta                                                                | Cele-UNSB01_4:9095021  | 4 | 9095021  | 9107795  | 12775 | 451 | 27 | ATAGTGGGAA |
| ATAGTGGGAAGCCACAGAGAGTAAATA                                                 |                        |   |          |          |       |     |    |            |
| UNSB01.fasta                                                                | Cele-UNSB01_4:9125039  | 4 | 9125039  | 9126314  | 1276  | 76  | 15 | CTCACCACGA |
| CTCACCACGAAGGGT                                                             |                        |   |          |          |       |     |    |            |
| UNSB01.fasta                                                                | Cele-UNSB01_4:9469814  | 4 | 9469814  | 9470654  | 841   | 56  | 15 | ACGATGGGTC |
| ACGATGGGTCTCACC                                                             |                        |   |          |          |       |     |    |            |
| UNSB01.fasta                                                                | Cele-UNSB01_4:9470711  | 4 | 9470711  | 9470851  | 141   | 5   | 30 | AATTTTCCAG |
| AATTTTCCAGAAGGTTCTGGAACATTCCAG                                              |                        |   |          |          |       |     |    |            |
| UNSB01.fasta                                                                | Cele-UNSB01_4:9470964  | 4 | 9470964  | 9471243  | 280   | 10  | 11 | GTACTCCTAC |
| GTACTCCTACA                                                                 |                        |   |          |          |       |     |    |            |
| UNSB01.fasta                                                                | Cele-UNSB01_4:9493015  | 4 | 9493015  | 9493149  | 135   | 4   | 11 | CCCTACAGTA |
| CCCTACAGTAA                                                                 |                        |   |          |          |       |     |    |            |
| UNSB01.fasta                                                                | Cele-UNSB01_4:9825630  | 4 | 9825630  | 9825857  | 228   | 5   | 45 | GGGTACCTCC |
| GGGTACCTCCTGGTGATCTGATCCTTCAGCTCCGAAAGATCAGAA                               |                        |   |          |          |       |     |    |            |
| UNSB01.fasta                                                                | Cele-UNSB01_4:10086561 | 4 | 10086561 | 10087053 | 493   | 10  | 11 | TACTGTAGGG |
| TACTGTAGGGG                                                                 |                        |   |          |          |       |     |    |            |
| UNSB01.fasta                                                                | Cele-UNSB01_4:10323949 | 4 | 10323949 | 10324337 | 389   | 26  | 15 | GACCCATCGT |
| GACCCATCGTGGTGA                                                             |                        |   |          |          |       |     |    |            |
| UNSB01.fasta                                                                | Cele-UNSB01_4:10324370 | 4 | 10324370 | 10326780 | 2411  | 67  | 35 | GAAATTCAAA |
| GAAATTCAAAATTTTCAGTGAAAAAATTTTAGCGG                                         |                        |   |          |          |       |     |    |            |
| UNSB01.fasta                                                                | Cele-UNSB01_4:10610325 | 4 | 10610325 | 10610863 | 539   | 7   | 77 | GGAAGCTTCA |
| GGAAGCTTCATCTTTGAATTATAAAAAATAAATTTTCAATTCAAATCAGTGTGTGCACTATCAAAAGTGTCCACT |                        |   |          |          |       |     |    |            |
| UNSB01.fasta                                                                | Cele-UNSB01_4:10751931 | 4 | 10751931 | 10752311 | 381   | 20  | 19 | ATTGTTACAC |
| ATTGTTACACGAAAAATAG                                                         |                        |   |          |          |       |     |    |            |

|                                                                                                                                                         |                        |   |          |          |       |     |     |             |
|---------------------------------------------------------------------------------------------------------------------------------------------------------|------------------------|---|----------|----------|-------|-----|-----|-------------|
| UNSB01.fasta                                                                                                                                            | Cele-UNSB01_4:11013752 | 4 | 11013752 | 11031328 | 17577 | 392 | 45  | TCCTGGTGTAT |
| TCCTGGTGTATGTGATCCTTAAGCTCCGAAGGATCACAGGGGTACC                                                                                                          |                        |   |          |          |       |     |     |             |
| UNSB01.fasta                                                                                                                                            | Cele-UNSB01_4:11032975 | 4 | 11032975 | 11034460 | 1486  | 33  | 45  | TCACCAGGAG  |
| TCACCAGGAGGTACCCTTGTGATCCTTTCGAGCTGAAGGATCAGA                                                                                                           |                        |   |          |          |       |     |     |             |
| UNSB01.fasta                                                                                                                                            | Cele-UNSB01_4:11073363 | 4 | 11073363 | 11083545 | 10183 | 395 | 26  | GTTCAACCAAA |
| GTTCAACCAAAATTTAGTGACTCTGGCC                                                                                                                            |                        |   |          |          |       |     |     |             |
| UNSB01.fasta                                                                                                                                            | Cele-UNSB01_4:11083607 | 4 | 11083607 | 11084360 | 754   | 4   | 11  | TTTGAAATAT  |
| TTTGAAATATA                                                                                                                                             |                        |   |          |          |       |     |     |             |
| UNSB01.fasta                                                                                                                                            | Cele-UNSB01_4:11084695 | 4 | 11084695 | 11084799 | 105   | 4   | 26  | CCAGAGTCAC  |
| CCAGAGTCACAATTTTGGTGAACAA                                                                                                                               |                        |   |          |          |       |     |     |             |
| UNSB01.fasta                                                                                                                                            | Cele-UNSB01_4:11101964 | 4 | 11101964 | 11102048 | 85    | 4   | 21  | AAATCTAATC  |
| AAATCTAATCCAATATGGCCG                                                                                                                                   |                        |   |          |          |       |     |     |             |
| UNSB01.fasta                                                                                                                                            | Cele-UNSB01_4:11132963 | 4 | 11132963 | 11135728 | 2766  | 35  | 79  | GAAACTAAAA  |
| GAAACTAAAAACCTAATGAGACCCCAGAATACTGCCGTATTCTGTGTCAGGACTCATTAGGTAGAGAGGAGATTTCACAGAA                                                                      |                        |   |          |          |       |     |     |             |
| UNSB01.fasta                                                                                                                                            | Cele-UNSB01_4:11180885 | 4 | 11180885 | 11199179 | 18295 | 470 | 39  | TTTATGGAAA  |
| TTTATGGAAAAGTGGCTCTAGAGCCACTAGAAAATACCAAG                                                                                                               |                        |   |          |          |       |     |     |             |
| UNSB01.fasta                                                                                                                                            | Cele-UNSB01_4:11302758 | 4 | 11302758 | 11302850 | 93    | 6   | 15  | CGAAAAGGGG  |
| CGAAAAGGGGATCTG                                                                                                                                         |                        |   |          |          |       |     |     |             |
| UNSB01.fasta                                                                                                                                            | Cele-UNSB01_4:11303025 | 4 | 11303025 | 11303087 | 63    | 4   | 15  | TCCCCTTTTTC |
| TCCCCTTTTTCGAGA                                                                                                                                         |                        |   |          |          |       |     |     |             |
| UNSB01.fasta                                                                                                                                            | Cele-UNSB01_4:11734646 | 4 | 11734646 | 11742696 | 8051  | 322 | 25  | ATTACGGCAG  |
| ATTACGGCAGATTCTATAAATTTGC                                                                                                                               |                        |   |          |          |       |     |     |             |
| UNSB01.fasta                                                                                                                                            | Cele-UNSB01_4:11742877 | 4 | 11742877 | 11743140 | 264   | 13  | 17  | AAAATCAAAC  |
| AAAATCAAACCGGAGAC                                                                                                                                       |                        |   |          |          |       |     |     |             |
| UNSB01.fasta                                                                                                                                            | Cele-UNSB01_4:12149712 | 4 | 12149712 | 12149981 | 270   | 10  | 11  | GTACTGTAGG  |
| GTACTGTAGTA                                                                                                                                             |                        |   |          |          |       |     |     |             |
| UNSB01.fasta                                                                                                                                            | Cele-UNSB01_4:12150067 | 4 | 12150067 | 12150386 | 320   | 8   | 40  | TCCAGAACCT  |
| TCCAGAACCTTCTGGAAAATTCGAGAAAATTCTGGAATGT                                                                                                                |                        |   |          |          |       |     |     |             |
| UNSB01.fasta                                                                                                                                            | Cele-UNSB01_4:12150586 | 4 | 12150586 | 12159522 | 8937  | 274 | 32  | CGGGAATTCA  |
| CGGGAATTCAAATAATTCTGTGAAAAATTTTGG                                                                                                                       |                        |   |          |          |       |     |     |             |
| UNSB01.fasta                                                                                                                                            | Cele-UNSB01_4:12289740 | 4 | 12289740 | 12290350 | 611   | 8   | 35  | AAATTTGAAT  |
| AAATTTGAATTTCCTCCAAAAATTTTTTACTGA                                                                                                                       |                        |   |          |          |       |     |     |             |
| UNSB01.fasta                                                                                                                                            | Cele-UNSB01_4:12303349 | 4 | 12303349 | 12310067 | 6719  | 128 | 59  | TCCATAATTC  |
| TCCATAATTCCTCATAATTCTCGGTTTTAAAAATTTTGAAAACCAAGTGAAGTCTTGATAT                                                                                           |                        |   |          |          |       |     |     |             |
| UNSB01.fasta                                                                                                                                            | Cele-UNSB01_4:12453898 | 4 | 12453898 | 12454471 | 574   | 6   | 96  | GGTTGATTTG  |
| GGTTGATTTGCGGCACTCTACAGATAGTGGATCTGCTTCTTACCAATCTTCCCGTTACCGCCACGCACTAAAGCTCCAAACTATTTTATTTTTTTG                                                        |                        |   |          |          |       |     |     |             |
| UNSB01.fasta                                                                                                                                            | Cele-UNSB01_4:12476016 | 4 | 12476016 | 12476336 | 321   | 18  | 16  | GTGCCTACGT  |
| GTGCCTACGTGCCTAC                                                                                                                                        |                        |   |          |          |       |     |     |             |
| UNSB01.fasta                                                                                                                                            | Cele-UNSB01_4:12649750 | 4 | 12649750 | 12649885 | 136   | 5   | 27  | ACAATAAAGT  |
| ACAATAAAGTACTATGTATTACCGTAT                                                                                                                             |                        |   |          |          |       |     |     |             |
| UNSB01.fasta                                                                                                                                            | Cele-UNSB01_4:12734217 | 4 | 12734217 | 12734312 | 96    | 5   | 19  | AAAAATAGAT  |
| AAAAATAGATTGACAGACG                                                                                                                                     |                        |   |          |          |       |     |     |             |
| UNSB01.fasta                                                                                                                                            | Cele-UNSB01_4:12770724 | 4 | 12770724 | 12770816 | 93    | 6   | 15  | CGAAAAGGGG  |
| CGAAAAGGGGATCTG                                                                                                                                         |                        |   |          |          |       |     |     |             |
| UNSB01.fasta                                                                                                                                            | Cele-UNSB01_4:12770991 | 4 | 12770991 | 12771083 | 93    | 5   | 15  | TCCCCTTTTTC |
| TCCCCTTTTTCGTATC                                                                                                                                        |                        |   |          |          |       |     |     |             |
| UNSB01.fasta                                                                                                                                            | Cele-UNSB01_4:12787287 | 4 | 12787287 | 12803219 | 15933 | 166 | 96  | GTTCCCATAA  |
| GTTCCCATAAATGGGTTAAATACCACTCATAAGTAAC TAGTATGGGACTGAAAAGATACTAAATGAGCTTATTCTAAGGGTGAAGCTTCTGGTAAT                                                       |                        |   |          |          |       |     |     |             |
| UNSB01.fasta                                                                                                                                            | Cele-UNSB01_4:12842983 | 4 | 12842983 | 12843155 | 173   | 5   | 35  | AAACCGGCAA  |
| AAACCGGCAATTGCCGAAATTGCCGAAAATTCTCG                                                                                                                     |                        |   |          |          |       |     |     |             |
| UNSB01.fasta                                                                                                                                            | Cele-UNSB01_4:12895275 | 4 | 12895275 | 12902336 | 7062  | 272 | 26  | CATTGCGGCG  |
| CATTGCGGCGGATTTTGGAAAAATGA                                                                                                                              |                        |   |          |          |       |     |     |             |
| UNSB01.fasta                                                                                                                                            | Cele-UNSB01_4:13061036 | 4 | 13061036 | 13070540 | 9505  | 198 | 48  | ACGGGCAAAAT |
| ACGGGCAAAATCAAAAATTAAATTGCTCATCTTCAGAAAAATATAAAAT                                                                                                       |                        |   |          |          |       |     |     |             |
| UNSB01.fasta                                                                                                                                            | Cele-UNSB01_4:13110533 | 4 | 13110533 | 13113073 | 2541  | 14  | 168 | TTTTTAAAAA  |
| TTTTTTAAAAAATCTAGAATCCAAATCTATCAAACATTTCCGGAATTCGATAATTTTTATTTTTGTTTTTTTGAGCCTACTAGTACCTGTGAAAATTGGAAC TCGACACAAAAACCTCTCTAGCGCGGCTTAAATTTACTTTCTCTGGCC |                        |   |          |          |       |     |     |             |
| CACAAACTTACCAATAATA                                                                                                                                     |                        |   |          |          |       |     |     |             |
| UNSB01.fasta                                                                                                                                            | Cele-UNSB01_4:13187743 | 4 | 13187743 | 13188346 | 604   | 12  | 12  | GCTTGGGTTT  |
| GCTTGGGGTTAG                                                                                                                                            |                        |   |          |          |       |     |     |             |

|                                                                                                                                                       |                        |   |          |          |      |     |     |            |
|-------------------------------------------------------------------------------------------------------------------------------------------------------|------------------------|---|----------|----------|------|-----|-----|------------|
| UNSB01.fasta                                                                                                                                          | Cele-UNSB01_4:13187743 | 4 | 13187743 | 13188478 | 736  | 17  | 12  | GCTTGGGTTT |
| GCTTGGGGTTAG                                                                                                                                          |                        |   |          |          |      |     |     |            |
| UNSB01.fasta                                                                                                                                          | Cele-UNSB01_4:13295662 | 4 | 13295662 | 13296286 | 625  | 24  | 26  | ATTAGATGAA |
| ATTAGATGAATTTCCAAAGTTAGACC                                                                                                                            |                        |   |          |          |      |     |     |            |
| UNSB01.fasta                                                                                                                                          | Cele-UNSB01_4:13402475 | 4 | 13402475 | 13402619 | 145  | 12  | 12  | TATACCTATA |
| TATACCCATAACC                                                                                                                                         |                        |   |          |          |      |     |     |            |
| UNSB01.fasta                                                                                                                                          | Cele-UNSB01_4:13540735 | 4 | 13540735 | 13544977 | 4243 | 166 | 25  | TTTACTCTCT |
| TTTACTCTCTGCTTCACAGAATAA                                                                                                                              |                        |   |          |          |      |     |     |            |
| UNSB01.fasta                                                                                                                                          | Cele-UNSB01_4:13614335 | 4 | 13614335 | 13614410 | 76   | 5   | 15  | CACAGGAGGC |
| CACAGGAGGCTGGGA                                                                                                                                       |                        |   |          |          |      |     |     |            |
| UNSB01.fasta                                                                                                                                          | Cele-UNSB01_4:13645449 | 4 | 13645449 | 13645792 | 344  | 22  | 15  | ACCCATCGTG |
| ACCCACCGTGGTGAG                                                                                                                                       |                        |   |          |          |      |     |     |            |
| UNSB01.fasta                                                                                                                                          | Cele-UNSB01_4:13645884 | 4 | 13645884 | 13646555 | 672  | 18  | 35  | GAAATTTAAA |
| GAAATTTAAATTTTCTGTGAAAAATATTGGCGG                                                                                                                     |                        |   |          |          |      |     |     |            |
| UNSB01.fasta                                                                                                                                          | Cele-UNSB01_4:13646609 | 4 | 13646609 | 13646697 | 89   | 4   | 23  | AATATTTATT |
| AATATTTATTTATTTATTTAATA                                                                                                                               |                        |   |          |          |      |     |     |            |
| UNSB01.fasta                                                                                                                                          | Cele-UNSB01_4:13645885 | 4 | 13645885 | 13647427 | 1543 | 25  | 35  | AAATTTAAAT |
| AAATTTAAATTTTCTGTGAAAAATATTGGCGGG                                                                                                                     |                        |   |          |          |      |     |     |            |
| UNSB01.fasta                                                                                                                                          | Cele-UNSB01_4:13647491 | 4 | 13647491 | 13647701 | 211  | 14  | 15  | CCACGATGGG |
| CCACGATGGGTCTCG                                                                                                                                       |                        |   |          |          |      |     |     |            |
| UNSB01.fasta                                                                                                                                          | Cele-UNSB01_4:13646820 | 4 | 13646820 | 13647869 | 1050 | 12  | 40  | GTTCTGGAAC |
| GTTCTGGAACATTCAGTATTTTCTCGATTTTCTAGAAA                                                                                                                |                        |   |          |          |      |     |     |            |
| UNSB01.fasta                                                                                                                                          | Cele-UNSB01_4:13647739 | 4 | 13647739 | 13648797 | 1059 | 13  | 27  | TTTTTAAAT  |
| TTTTTAAATTCATATACCGTTCTAAC                                                                                                                            |                        |   |          |          |      |     |     |            |
| UNSB01.fasta                                                                                                                                          | Cele-UNSB01_4:13661650 | 4 | 13661650 | 13661868 | 219  | 6   | 31  | AATTCAAATT |
| AATTCAAATTTTCTCAAAAAATTTGGCGGG                                                                                                                        |                        |   |          |          |      |     |     |            |
| UNSB01.fasta                                                                                                                                          | Cele-UNSB01_4:13730774 | 4 | 13730774 | 13730818 | 45   | 4   | 11  | CACATTTTTT |
| CACATTTTTTC                                                                                                                                           |                        |   |          |          |      |     |     |            |
| UNSB01.fasta                                                                                                                                          | Cele-UNSB01_4:13731432 | 4 | 13731432 | 13732897 | 1466 | 8   | 164 | AAAATTCAAA |
| AAAATTCAAAAGTATGGGAAAATCATATGGAGTCATTCTTTTATTATTCATAAACTCTTCAGCATAGTCAAAAATACCAGAAAATGCCAATCAAAGTATAATAGCTTGTACGGAAGTATTTTTTTAAAAATTGATAAAAAATATATAAA |                        |   |          |          |      |     |     |            |
| AGCTGATTTTTTTTCA                                                                                                                                      |                        |   |          |          |      |     |     |            |
| UNSB01.fasta                                                                                                                                          | Cele-UNSB01_4:13759189 | 4 | 13759189 | 13759529 | 341  | 30  | 11  | GCACATTTTT |
| GCACATTTTCT                                                                                                                                           |                        |   |          |          |      |     |     |            |
| UNSB01.fasta                                                                                                                                          | Cele-UNSB01_4:13851511 | 4 | 13851511 | 13852113 | 603  | 12  | 40  | AAAATCTGG  |
| AAAATCTGGAATGTTCTAGAACCTTCTGGAAAGTTCGAG                                                                                                               |                        |   |          |          |      |     |     |            |
| UNSB01.fasta                                                                                                                                          | Cele-UNSB01_4:13917663 | 4 | 13917663 | 13921092 | 3430 | 37  | 93  | AGGGCCGCAG |
| AGGGCCGCAGGCCGAACACTCTTGGAAGCTGGGCTGGCTTTAATCCTATTCCAAGCAGATTGTTATTCACTCAAGCCTATCAACCAAGTTTG                                                          |                        |   |          |          |      |     |     |            |
| UNSB01.fasta                                                                                                                                          | Cele-UNSB01_4:14030114 | 4 | 14030114 | 14030248 | 135  | 6   | 11  | AGTACTGTAG |
| AGTACTGTAGG                                                                                                                                           |                        |   |          |          |      |     |     |            |
| UNSB01.fasta                                                                                                                                          | Cele-UNSB01_4:14030460 | 4 | 14030460 | 14031210 | 751  | 45  | 15  | CCCATCGTGG |
| CCCATCGTGGCGAGA                                                                                                                                       |                        |   |          |          |      |     |     |            |
| UNSB01.fasta                                                                                                                                          | Cele-UNSB01_4:14031556 | 4 | 14031556 | 14031756 | 201  | 5   | 40  | AATGTTCCAG |
| AATGTTCCAGAACTTTCTAGAAAAATCGAGAAAATTCTGG                                                                                                              |                        |   |          |          |      |     |     |            |
| UNSB01.fasta                                                                                                                                          | Cele-UNSB01_4:14046078 | 4 | 14046078 | 14046558 | 481  | 12  | 40  | CAGAACCTTC |
| CAAAACCTTCTGGAAAATTTGAGAAAATGCTGGAATGTTC                                                                                                              |                        |   |          |          |      |     |     |            |
| UNSB01.fasta                                                                                                                                          | Cele-UNSB01_4:14046107 | 4 | 14046107 | 14046777 | 671  | 11  | 40  | CTGGAATGTT |
| CTGGAATGTTCCAGAACCTTCTTGAAAAATTTGAGAAAATT                                                                                                             |                        |   |          |          |      |     |     |            |
| UNSB01.fasta                                                                                                                                          | Cele-UNSB01_4:14068578 | 4 | 14068578 | 14068998 | 421  | 24  | 15  | ACGATGGGTC |
| ACGATGGGTCTCGCC                                                                                                                                       |                        |   |          |          |      |     |     |            |
| UNSB01.fasta                                                                                                                                          | Cele-UNSB01_4:14093954 | 4 | 14093954 | 14094851 | 898  | 32  | 32  | CGACCTGCGA |
| CGACCTGCGACCTAGCGACCTGGGTCTGCTTTG                                                                                                                     |                        |   |          |          |      |     |     |            |
| UNSB01.fasta                                                                                                                                          | Cele-UNSB01_4:14106561 | 4 | 14106561 | 14106695 | 135  | 6   | 11  | AGTACTGTAG |
| AGTACTGTAGG                                                                                                                                           |                        |   |          |          |      |     |     |            |
| UNSB01.fasta                                                                                                                                          | Cele-UNSB01_4:14106973 | 4 | 14106973 | 14107062 | 90   | 6   | 15  | ACCCATCGTG |
| ACCCATCGTGGTGAG                                                                                                                                       |                        |   |          |          |      |     |     |            |
| UNSB01.fasta                                                                                                                                          | Cele-UNSB01_4:14107092 | 4 | 14107092 | 14108860 | 1769 | 51  | 35  | GGGAAATTTA |
| GGGAAATTTAAATTTTCTGTGAAAAATATTTTGA                                                                                                                    |                        |   |          |          |      |     |     |            |
| UNSB01.fasta                                                                                                                                          | Cele-UNSB01_4:14107092 | 4 | 14107092 | 14111107 | 4016 | 106 | 35  | GGGAAATTTA |
| GGGAAATTTAAATTTTCTGTGAAAAATATTTTGA                                                                                                                    |                        |   |          |          |      |     |     |            |

|                                                                                                                                                         |                        |   |          |          |      |     |     |            |
|---------------------------------------------------------------------------------------------------------------------------------------------------------|------------------------|---|----------|----------|------|-----|-----|------------|
| UNSB01.fasta                                                                                                                                            | Cele-UNSB01_4:14107093 | 4 | 14107093 | 14113320 | 6228 | 160 | 35  | GGAAATTTAA |
| GGAAATTTAAATTTTCTGTGAAAAATATTTTGGAG                                                                                                                     |                        |   |          |          |      |     |     |            |
| UNSB01.fasta                                                                                                                                            | Cele-UNSB01_4:14154469 | 4 | 14154469 | 14154585 | 117  | 4   | 29  | TACATTGCAA |
| TACATTGCAAGATTTTCTTACTATGTAGG                                                                                                                           |                        |   |          |          |      |     |     |            |
| UNSB01.fasta                                                                                                                                            | Cele-UNSB01_4:14405343 | 4 | 14405343 | 14406331 | 989  | 13  | 76  | AATGCTAGAG |
| AATGCTAGAGGACACTCCTTTGCACGAAAGGAAGTGGGAGAGACTGTGGAGTTGTGCGGTGCTTTGTGCATGCTCG                                                                            |                        |   |          |          |      |     |     |            |
| UNSB01.fasta                                                                                                                                            | Cele-UNSB01_4:14407623 | 4 | 14407623 | 14408822 | 1200 | 70  | 14  | GCTATGCGCT |
| GCTATGCGCTGTTA                                                                                                                                          |                        |   |          |          |      |     |     |            |
| UNSB01.fasta                                                                                                                                            | Cele-UNSB01_4:14408867 | 4 | 14408867 | 14409192 | 326  | 13  | 25  | TAATGCCAAT |
| TAATGCCAATTATAGAATCTGCCG                                                                                                                                |                        |   |          |          |      |     |     |            |
| UNSB01.fasta                                                                                                                                            | Cele-UNSB01_4:14409220 | 4 | 14409220 | 14409304 | 85   | 6   | 14  | AGCGTATAGC |
| AGCGTATAGCTAT                                                                                                                                           |                        |   |          |          |      |     |     |            |
| UNSB01.fasta                                                                                                                                            | Cele-UNSB01_4:14410457 | 4 | 14410457 | 14414735 | 4279 | 57  | 76  | TCGTGCAAAG |
| TCGTGCAAAGAGAGTGTCTCTAGCATTTCGAGCATGCACAAAGACACCGACAACCTCCACAGTCTCTCCACTTCTTT                                                                           |                        |   |          |          |      |     |     |            |
| UNSB01.fasta                                                                                                                                            | Cele-UNSB01_4:14417295 | 4 | 14417295 | 14419575 | 2281 | 148 | 15  | CTCACCACGA |
| CTCACCACGAAGGGT                                                                                                                                         |                        |   |          |          |      |     |     |            |
| UNSB01.fasta                                                                                                                                            | Cele-UNSB01_4:14618655 | 4 | 14618655 | 14620445 | 1791 | 7   | 200 | GAAAAAGTGA |
| GAAAAAGTGAATTTTCAGTCATACCTTGTAGACCACAAATTTATATGCAAAATTAATAGATTTTCCAAACTTTGAAAATTAATTTCTGGCTTCAAACCTAACTTTTTTAAAAATTCCCGTAGCCATTTGTAGCAAAATTTTATGTTCTATT |                        |   |          |          |      |     |     |            |
| AGAATTTCAAAGAGAGTTTCAAAAAATTTTGAAACCATTAAAGTTCAAGCA                                                                                                     |                        |   |          |          |      |     |     |            |
| UNSB01.fasta                                                                                                                                            | Cele-UNSB01_4:14628221 | 4 | 14628221 | 14628977 | 757  | 36  | 21  | CAACTACCAC |
| CAACTACCACAACCTACCGTAC                                                                                                                                  |                        |   |          |          |      |     |     |            |
| UNSB01.fasta                                                                                                                                            | Cele-UNSB01_4:14648431 | 4 | 14648431 | 14648725 | 295  | 13  | 21  | ACTACCGTAC |
| ACTACCGTACCAACTACCACA                                                                                                                                   |                        |   |          |          |      |     |     |            |
| UNSB01.fasta                                                                                                                                            | Cele-UNSB01_4:14678240 | 4 | 14678240 | 14678405 | 166  | 11  | 15  | GACCCATCGT |
| GACCTATCGTGGCGA                                                                                                                                         |                        |   |          |          |      |     |     |            |
| UNSB01.fasta                                                                                                                                            | Cele-UNSB01_4:14678232 | 4 | 14678232 | 14682258 | 4027 | 80  | 15  | CGTGGTGAGA |
| CGTGGCGAGACCTAT                                                                                                                                         |                        |   |          |          |      |     |     |            |
| UNSB01.fasta                                                                                                                                            | Cele-UNSB01_4:14942266 | 4 | 14942266 | 14942426 | 161  | 5   | 40  | TTTTCTAGAA |
| TTTTCTAGAAAGTTCTAGAACATTGCCGATTTTCCCGAT                                                                                                                 |                        |   |          |          |      |     |     |            |
| UNSB01.fasta                                                                                                                                            | Cele-UNSB01_4:15002663 | 4 | 15002663 | 15002793 | 131  | 5   | 26  | TGGTTAGAGT |
| TGGTTAGAGTCATATTTTTAGGTGAA                                                                                                                              |                        |   |          |          |      |     |     |            |
| UNSB01.fasta                                                                                                                                            | Cele-UNSB01_4:15255716 | 4 | 15255716 | 15255837 | 122  | 9   | 11  | TGTGCAAAAA |
| TGTGCAAAAA                                                                                                                                              |                        |   |          |          |      |     |     |            |
| UNSB01.fasta                                                                                                                                            | Cele-UNSB01_4:15280499 | 4 | 15280499 | 15283896 | 3398 | 88  | 40  | AGAAAGTTCT |
| AGAAAGTTCTGGAACATTCCAGAAATTTCTCGATTTTTCT                                                                                                                |                        |   |          |          |      |     |     |            |
| UNSB01.fasta                                                                                                                                            | Cele-UNSB01_4:15284214 | 4 | 15284214 | 15284904 | 691  | 39  | 15  | GGTCTCACCA |
| GGTCTCACACGATG                                                                                                                                          |                        |   |          |          |      |     |     |            |
| UNSB01.fasta                                                                                                                                            | Cele-UNSB01_4:15313385 | 4 | 15313385 | 15313490 | 106  | 7   | 15  | GGGTCTCACC |
| GGGTCTCACCGAT                                                                                                                                           |                        |   |          |          |      |     |     |            |
| UNSB01.fasta                                                                                                                                            | Cele-UNSB01_4:15313710 | 4 | 15313710 | 15313830 | 121  | 8   | 15  | TCGTGGTGAG |
| TCGTGGTGAGAACCT                                                                                                                                         |                        |   |          |          |      |     |     |            |
| UNSB01.fasta                                                                                                                                            | Cele-UNSB01_4:15399620 | 4 | 15399620 | 15399800 | 181  | 11  | 15  | GAGACCCATC |
| GAGACCCATCGTGGC                                                                                                                                         |                        |   |          |          |      |     |     |            |
| UNSB01.fasta                                                                                                                                            | Cele-UNSB01_4:15399887 | 4 | 15399887 | 15400027 | 141  | 4   | 35  | AAATTTTCTG |
| AAATTTTCTGAGAAACTATTTTGAGGGAAATTT                                                                                                                       |                        |   |          |          |      |     |     |            |
| UNSB01.fasta                                                                                                                                            | Cele-UNSB01_4:15400092 | 4 | 15400092 | 15400412 | 321  | 8   | 40  | GAATGTTCCA |
| GAATGTTCCAGAACTTCTAGAAAAATCGAGAAAATTCG                                                                                                                  |                        |   |          |          |      |     |     |            |
| UNSB01.fasta                                                                                                                                            | Cele-UNSB01_4:15421750 | 4 | 15421750 | 15421870 | 121  | 8   | 15  | GGTGAGACCC |
| GGTGAGACCCATCGT                                                                                                                                         |                        |   |          |          |      |     |     |            |
| UNSB01.fasta                                                                                                                                            | Cele-UNSB01_4:15421887 | 4 | 15421887 | 15425906 | 4020 | 116 | 34  | TGGCGGGAAA |
| TGGCGGGAAATTCAAATTTTCAGTGAAAAATTT                                                                                                                       |                        |   |          |          |      |     |     |            |
| UNSB01.fasta                                                                                                                                            | Cele-UNSB01_4:15434528 | 4 | 15434528 | 15434620 | 93   | 6   | 15  | CGAAAAGGGG |
| CGAAAAGGGGATCTG                                                                                                                                         |                        |   |          |          |      |     |     |            |
| UNSB01.fasta                                                                                                                                            | Cele-UNSB01_4:15434795 | 4 | 15434795 | 15434872 | 78   | 5   | 15  | TCCCCTTTTC |
| TCCCCTTTTCGTATC                                                                                                                                         |                        |   |          |          |      |     |     |            |
| UNSB01.fasta                                                                                                                                            | Cele-UNSB01_4:15436315 | 4 | 15436315 | 15436698 | 384  | 11  | 35  | GGGAAATTCA |
| GGGAAATTCAAATTTTAGTAAAAAATATTTTGGC                                                                                                                      |                        |   |          |          |      |     |     |            |
| UNSB01.fasta                                                                                                                                            | Cele-UNSB01_4:15436367 | 4 | 15436367 | 15437145 | 779  | 9   | 35  | GTAAAAAATA |
| GTAAAAAATATTTTGGGAGGAAATCAAATTTTTA                                                                                                                      |                        |   |          |          |      |     |     |            |

|                                                                                                                                                      |                        |   |          |          |       |     |     |             |
|------------------------------------------------------------------------------------------------------------------------------------------------------|------------------------|---|----------|----------|-------|-----|-----|-------------|
| UNSB01.fasta                                                                                                                                         | Cele-UNSB01_4:15460070 | 4 | 15460070 | 15462017 | 1948  | 10  | 168 | AAAAACAAAA  |
| AAAAACAAAAATAAAAAATTTTGGGAATGTTGGGAGAATTTTATAGATTGGATTCTAGATTTTAAACAAATATTTTGGTAAGTTTCTGGACCTAGATATCAATTTTCAGATGCGCTAGAGGGGTTTTGTCTTGAATTTCCAATTTCAA |                        |   |          |          |       |     |     |             |
| CAGATATATACAGGCACAA                                                                                                                                  |                        |   |          |          |       |     |     |             |
| UNSB01.fasta                                                                                                                                         | Cele-UNSB01_4:15460844 | 4 | 15460844 | 15462434 | 1591  | 9   | 168 | AACAAAAATA  |
| AACAAAAATAAAAAATTTTGGGAATGTTGGGAGAATTTTATAGATTGGATTCTAGATTTTAAACAAATATTTTGGTAAGTTTCTGGACCTAGATATCAATTTTCAGATGCGCTAGAGGGGTTTTGTGTTGAAATTTATTTTTCACAG  |                        |   |          |          |       |     |     |             |
| GTATATACAGGCACAAAAA                                                                                                                                  |                        |   |          |          |       |     |     |             |
| UNSB01.fasta                                                                                                                                         | Cele-UNSB01_4:15529257 | 4 | 15529257 | 15530020 | 764   | 4   | 14  | TTGTAGTTTG  |
| TTGTAATTTGTAGT                                                                                                                                       |                        |   |          |          |       |     |     |             |
| UNSB01.fasta                                                                                                                                         | Cele-UNSB01_4:15554617 | 4 | 15554617 | 15554707 | 91    | 6   | 15  | TCGTGGTGAG  |
| TCGTGGTGGGACCCCT                                                                                                                                     |                        |   |          |          |       |     |     |             |
| UNSB01.fasta                                                                                                                                         | Cele-UNSB01_4:15554734 | 4 | 15554734 | 15555678 | 945   | 27  | 35  | GAAATTCAAA  |
| GAAATTCAAAATTTTCAGTGAAAAAATTTTGGCGG                                                                                                                  |                        |   |          |          |       |     |     |             |
| UNSB01.fasta                                                                                                                                         | Cele-UNSB01_4:15607346 | 4 | 15607346 | 15608026 | 681   | 17  | 40  | GAACATTCCA  |
| GAACATTCAGAATTTTCTCAATTTTCTAGAAAGTTCTT                                                                                                               |                        |   |          |          |       |     |     |             |
| UNSB01.fasta                                                                                                                                         | Cele-UNSB01_4:15608407 | 4 | 15608407 | 15609476 | 1070  | 51  | 15  | CCACGATGGG  |
| CCACGATGGGTCTCA                                                                                                                                      |                        |   |          |          |       |     |     |             |
| UNSB01.fasta                                                                                                                                         | Cele-UNSB01_4:15642758 | 4 | 15642758 | 15643070 | 313   | 12  | 26  | CAGAGTCACT  |
| CAGAGTCACTATTTTGGTGAACGGC                                                                                                                            |                        |   |          |          |       |     |     |             |
| UNSB01.fasta                                                                                                                                         | Cele-UNSB01_4:15644313 | 4 | 15644313 | 15644403 | 91    | 8   | 10  | TGTTATGATA  |
| GTTATGATAG                                                                                                                                           |                        |   |          |          |       |     |     |             |
| UNSB01.fasta                                                                                                                                         | Cele-UNSB01_4:15744856 | 4 | 15744856 | 15746870 | 2015  | 12  | 168 | GAATTCCGGA  |
| GAATTCGGAAATGTTTGATAGATTGGATTCTGGTTTTTTTTAAATATTATTGGAAGTTTGTGGACCAGGAAAGTAAATTTAAGCCGCGCTAAAGAGGTTTTGTGTCGAGTTCCAATTTTACAGGTACTAGTAGCGCAAAAA        |                        |   |          |          |       |     |     |             |
| AACAAAAATAAAAAATTATG                                                                                                                                 |                        |   |          |          |       |     |     |             |
| UNSB01.fasta                                                                                                                                         | Cele-UNSB01_4:15750800 | 4 | 15750800 | 15751080 | 281   | 8   | 35  | TTGCCGGATT  |
| TTGCCGGATTTGAAAATTTATGGTAATTTGCCGTT                                                                                                                  |                        |   |          |          |       |     |     |             |
| UNSB01.fasta                                                                                                                                         | Cele-UNSB01_4:15869737 | 4 | 15869737 | 15871646 | 1910  | 128 | 14  | GGACTAGGGA  |
| GGACTAAGGACTAG                                                                                                                                       |                        |   |          |          |       |     |     |             |
| UNSB01.fasta                                                                                                                                         | Cele-UNSB01_4:15883454 | 4 | 15883454 | 15883531 | 78    | 6   | 11  | TGCACATTTT  |
| TGCACATTTT                                                                                                                                           |                        |   |          |          |       |     |     |             |
| UNSB01.fasta                                                                                                                                         | Cele-UNSB01_4:15943206 | 4 | 15943206 | 15943656 | 451   | 14  | 32  | TTGAATTTCCC |
| TTGAATTTCCGCCAAAAATTTTTCACAGAAAAAT                                                                                                                   |                        |   |          |          |       |     |     |             |
| UNSB01.fasta                                                                                                                                         | Cele-UNSB01_4:15944034 | 4 | 15944034 | 15944234 | 201   | 5   | 40  | ATTTTCCAGA  |
| ATTTTCCAGAAGGTTCTGGAACATTCAGCATTTTCTCAA                                                                                                              |                        |   |          |          |       |     |     |             |
| UNSB01.fasta                                                                                                                                         | Cele-UNSB01_4:16000310 | 4 | 16000310 | 16000589 | 280   | 6   | 40  | GATTTTCTTA  |
| GATTTTCTAGAAAGTTCTGGAACATTCAGAAATTTTCTC                                                                                                              |                        |   |          |          |       |     |     |             |
| UNSB01.fasta                                                                                                                                         | Cele-UNSB01_4:15999976 | 4 | 15999976 | 16000920 | 945   | 8   | 35  | AAAATTTAAA  |
| AAAATTTAAATTTCCCGCCAAAAATTTTCTCAG                                                                                                                    |                        |   |          |          |       |     |     |             |
| UNSB01.fasta                                                                                                                                         | Cele-UNSB01_4:16000962 | 4 | 16000962 | 16001082 | 121   | 8   | 15  | GGGTCTCACC  |
| GGGTCTCACCACGAT                                                                                                                                      |                        |   |          |          |       |     |     |             |
| UNSB01.fasta                                                                                                                                         | Cele-UNSB01_4:16000985 | 4 | 16000985 | 16001240 | 256   | 17  | 15  | CCACGATGGG  |
| CCACGATGGGTCTCA                                                                                                                                      |                        |   |          |          |       |     |     |             |
| UNSB01.fasta                                                                                                                                         | Cele-UNSB01_4:16001468 | 4 | 16001468 | 16002088 | 621   | 19  | 11  | GTACTCCTAC  |
| GTACTCCTACA                                                                                                                                          |                        |   |          |          |       |     |     |             |
| UNSB01.fasta                                                                                                                                         | Cele-UNSB01_4:16010822 | 4 | 16010822 | 16011211 | 390   | 5   | 42  | GCTCGGCAAA  |
| GCTCGGCAAAATATTGAAAAAGAGATTTGCCGAATTTGCCGT                                                                                                           |                        |   |          |          |       |     |     |             |
| UNSB01.fasta                                                                                                                                         | Cele-UNSB01_4:16019565 | 4 | 16019565 | 16019814 | 250   | 6   | 31  | TCGACAGAAG  |
| TCGACAGAAGCTGTGATCATCAGACTTTCC                                                                                                                       |                        |   |          |          |       |     |     |             |
| UNSB01.fasta                                                                                                                                         | Cele-UNSB01_4:16061332 | 4 | 16061332 | 16061647 | 316   | 21  | 15  | CCCATCGTGG  |
| CCCATCGTGGCGAGA                                                                                                                                      |                        |   |          |          |       |     |     |             |
| UNSB01.fasta                                                                                                                                         | Cele-UNSB01_4:16061680 | 4 | 16061680 | 16061959 | 280   | 8   | 35  | AATTTAAATT  |
| AATTTAAATTTCTGTGAAAAATATTTTGGCGGGA                                                                                                                   |                        |   |          |          |       |     |     |             |
| UNSB01.fasta                                                                                                                                         | Cele-UNSB01_4:16061215 | 4 | 16061215 | 16062273 | 1059  | 8   | 40  | GTTCCAGAAC  |
| GTTCCAGAACCTTCTAGAAAAATCGAGAAAAATCTGGAGT                                                                                                             |                        |   |          |          |       |     |     |             |
| UNSB01.fasta                                                                                                                                         | Cele-UNSB01_4:16077133 | 4 | 16077133 | 16078206 | 1074  | 16  | 37  | CGGGAATTCA  |
| CGGGAATTCAATTGTAAATTTTCGAAATCATTTCCG                                                                                                                 |                        |   |          |          |       |     |     |             |
| UNSB01.fasta                                                                                                                                         | Cele-UNSB01_4:16093909 | 4 | 16093909 | 16094066 | 158   | 8   | 20  | TGTTACACGA  |
| TGTTACACGAAAAATAGAT                                                                                                                                  |                        |   |          |          |       |     |     |             |
| UNSB01.fasta                                                                                                                                         | Cele-UNSB01_4:16130574 | 4 | 16130574 | 16144444 | 13871 | 346 | 40  | TTTTTCTAGA  |
| TTTTTCTAGAAAGTTCTGGAACATTCAGAAATTTCCCGA                                                                                                              |                        |   |          |          |       |     |     |             |

|                                                                                                                                                   |                        |   |          |          |       |     |     |             |
|---------------------------------------------------------------------------------------------------------------------------------------------------|------------------------|---|----------|----------|-------|-----|-----|-------------|
| UNSB01.fasta                                                                                                                                      | Cele-UNSB01_4:16144580 | 4 | 16144580 | 16144720 | 141   | 4   | 35  | CCAAAAATATT |
| CCAAAAATATTTTCTCAGAAAATTAAAAATTTCCCT                                                                                                              |                        |   |          |          |       |     |     |             |
| UNSB01.fasta                                                                                                                                      | Cele-UNSB01_4:16130581 | 4 | 16130581 | 16145036 | 14456 | 348 | 40  | AGAAAGTTCT  |
| AGAAAGTTCTGGAACATTCCAGAATTTTCCCGATTTTCT                                                                                                           |                        |   |          |          |       |     |     |             |
| UNSB01.fasta                                                                                                                                      | Cele-UNSB01_4:16219937 | 4 | 16219937 | 16221099 | 1163  | 29  | 35  | TTCCCGCCAA  |
| TTCCCGCCAAAAATTTTCTACTGAAAATTTGAAT                                                                                                                |                        |   |          |          |       |     |     |             |
| UNSB01.fasta                                                                                                                                      | Cele-UNSB01_4:16220033 | 4 | 16220033 | 16221319 | 1287  | 15  | 15  | CACGATGGGT  |
| CACGATGGGTCTCGT                                                                                                                                   |                        |   |          |          |       |     |     |             |
| UNSB01.fasta                                                                                                                                      | Cele-UNSB01_4:16343642 | 4 | 16343642 | 16344390 | 749   | 18  | 11  | GTACTGTAGG  |
| GTACTGTAGTA                                                                                                                                       |                        |   |          |          |       |     |     |             |
| UNSB01.fasta                                                                                                                                      | Cele-UNSB01_4:16376935 | 4 | 16376935 | 16378753 | 1819  | 17  | 15  | GGGTCTCACC  |
| GGGTCTCACC CGAA                                                                                                                                   |                        |   |          |          |       |     |     |             |
| UNSB01.fasta                                                                                                                                      | Cele-UNSB01_4:16402456 | 4 | 16402456 | 16402561 | 106   | 7   | 15  | GTGGTGAGAC  |
| GTGGTGAGACCTTC                                                                                                                                    |                        |   |          |          |       |     |     |             |
| UNSB01.fasta                                                                                                                                      | Cele-UNSB01_4:16472875 | 4 | 16472875 | 16473271 | 397   | 25  | 15  | TCTCACCACG  |
| TCACACCACGAAAGG                                                                                                                                   |                        |   |          |          |       |     |     |             |
| UNSB01.fasta                                                                                                                                      | Cele-UNSB01_4:16493225 | 4 | 16493225 | 16495520 | 2296  | 119 | 19  | AAATAGATTG  |
| AAATAGATTGTTACACGGA                                                                                                                               |                        |   |          |          |       |     |     |             |
| UNSB01.fasta                                                                                                                                      | Cele-UNSB01_4:16653889 | 4 | 16653889 | 16654239 | 351   | 10  | 35  | CAAATCGGCA  |
| CAAATCGGCAATATGCCAAAATTGAAAATTTCCGG                                                                                                               |                        |   |          |          |       |     |     |             |
| UNSB01.fasta                                                                                                                                      | Cele-UNSB01_4:16658516 | 4 | 16658516 | 16659248 | 733   | 21  | 35  | TTTGGCATAT  |
| TTTGGTATATGCCGGTTTGCCAGATATTTCAAT                                                                                                                 |                        |   |          |          |       |     |     |             |
| UNSB01.fasta                                                                                                                                      | Cele-UNSB01_4:16659843 | 4 | 16659843 | 16660088 | 246   | 7   | 35  | GCAAATCGGC  |
| GCAAATCGGCAAAATGGCCGAATTGAAAATTTCCA                                                                                                               |                        |   |          |          |       |     |     |             |
| UNSB01.fasta                                                                                                                                      | Cele-UNSB01_4:16675153 | 4 | 16675153 | 16675373 | 221   | 8   | 20  | TTTTAGTGAA  |
| TTTTAGTGAAAATTTGAGAT                                                                                                                              |                        |   |          |          |       |     |     |             |
| UNSB01.fasta                                                                                                                                      | Cele-UNSB01_4:16678025 | 4 | 16678025 | 16678676 | 652   | 13  | 50  | GGGCGTGT    |
| GGGCGTGTTTTTCACATGCCCGCCACAAAATGATGTTCCACCAAAAT                                                                                                   |                        |   |          |          |       |     |     |             |
| UNSB01.fasta                                                                                                                                      | Cele-UNSB01_4:16708641 | 4 | 16708641 | 16708839 | 199   | 5   | 40  | TTCCAGAATT  |
| TTCCAGAATTTTCTCGATTTTCTAGAAAAGTTCTGGAACG                                                                                                          |                        |   |          |          |       |     |     |             |
| UNSB01.fasta                                                                                                                                      | Cele-UNSB01_4:16709008 | 4 | 16709008 | 16709188 | 181   | 10  | 15  | TGGGTCTCAC  |
| TGGGTCTCACCACGA                                                                                                                                   |                        |   |          |          |       |     |     |             |
| UNSB01.fasta                                                                                                                                      | Cele-UNSB01_4:16721546 | 4 | 16721546 | 16722348 | 803   | 4   | 37  | ATTCAAATTT  |
| ATTCAAATTTTAATTTTTTGAAAATATTTTGACGGGA                                                                                                             |                        |   |          |          |       |     |     |             |
| UNSB01.fasta                                                                                                                                      | Cele-UNSB01_4:16741502 | 4 | 16741502 | 16741626 | 125   | 5   | 21  | TTCAAGCCTT  |
| TTCAAGCCTTTTCAGACCAAT                                                                                                                             |                        |   |          |          |       |     |     |             |
| UNSB01.fasta                                                                                                                                      | Cele-UNSB01_4:16762223 | 4 | 16762223 | 16763229 | 1007  | 39  | 11  | CTACAGTACT  |
| CTACAGTACCT                                                                                                                                       |                        |   |          |          |       |     |     |             |
| UNSB01.fasta                                                                                                                                      | Cele-UNSB01_4:16773369 | 4 | 16773369 | 16773770 | 402   | 28  | 11  | CCCCTACAGT  |
| CCCCTACAGTA                                                                                                                                       |                        |   |          |          |       |     |     |             |
| UNSB01.fasta                                                                                                                                      | Cele-UNSB01_4:16899632 | 4 | 16899632 | 16900079 | 448   | 15  | 30  | AAAATCAAAA  |
| AAAATCAAAAATTAGATGAATTTTCGATTA                                                                                                                    |                        |   |          |          |       |     |     |             |
| UNSB01.fasta                                                                                                                                      | Cele-UNSB01_4:16926190 | 4 | 16926190 | 16926350 | 161   | 4   | 40  | TTCCAGAATT  |
| TTCCAGAATTTTCCCGATTTTCTAGAAAAGTTCTGGAACG                                                                                                          |                        |   |          |          |       |     |     |             |
| UNSB01.fasta                                                                                                                                      | Cele-UNSB01_4:16926416 | 4 | 16926416 | 16926623 | 208   | 6   | 35  | TTGAATTTCC  |
| TTGAATTTCCCGCCAAAATATTTTCTACTGAAAAT                                                                                                               |                        |   |          |          |       |     |     |             |
| UNSB01.fasta                                                                                                                                      | Cele-UNSB01_4:16931676 | 4 | 16931676 | 16932199 | 524   | 4   | 150 | TTGAGGGCCG  |
| TTGAGGGCCGCGTCCCGAATACACGAAGAAGTGTGAGATCCGTCAAGCCTATTCTAAGCATAATAATTCAGTTCGAGTGTGCGAAGCCCAATAGACGCAGAAAGCGTTGGACAACTTTTAGGCTATTCTGAGCCCAATAATTCAT |                        |   |          |          |       |     |     |             |
| G                                                                                                                                                 |                        |   |          |          |       |     |     |             |
| UNSB01.fasta                                                                                                                                      | Cele-UNSB01_4:17138861 | 4 | 17138861 | 17138981 | 121   | 8   | 15  | TCGTGGTGAG  |
| TCGTGGTGAGACCT                                                                                                                                    |                        |   |          |          |       |     |     |             |
| UNSB01.fasta                                                                                                                                      | Cele-UNSB01_4:17168442 | 4 | 17168442 | 17168576 | 135   | 6   | 11  | AGTACTGTAG  |
| AGTACTGTAGG                                                                                                                                       |                        |   |          |          |       |     |     |             |
| UNSB01.fasta                                                                                                                                      | Cele-UNSB01_4:17168764 | 4 | 17168764 | 17168899 | 136   | 9   | 15  | TCGTGGTGAG  |
| TCGTGGTGAGACCCA                                                                                                                                   |                        |   |          |          |       |     |     |             |
| UNSB01.fasta                                                                                                                                      | Cele-UNSB01_4:17168941 | 4 | 17168941 | 17169150 | 210   | 6   | 35  | GAAATTTAAA  |
| GAAATTTAAATTTTCTGTGAAAAATGTTTGGCGG                                                                                                                |                        |   |          |          |       |     |     |             |
| UNSB01.fasta                                                                                                                                      | Cele-UNSB01_4:17169175 | 4 | 17169175 | 17169333 | 159   | 4   | 40  | AAAATTTCTGG |
| AACATTCTGGAATGTTCAGAACTTTCTAGAAAAATCGAG                                                                                                           |                        |   |          |          |       |     |     |             |

|                                                                                                                                                    |                        |   |          |          |      |     |     |            |
|----------------------------------------------------------------------------------------------------------------------------------------------------|------------------------|---|----------|----------|------|-----|-----|------------|
| UNSB01.fasta                                                                                                                                       | Cele-UNSB01_4:17223540 | 4 | 17223540 | 17224619 | 1080 | 56  | 19  | AAAAATAGAT |
| AAAAATAGATTGTTACACG                                                                                                                                |                        |   |          |          |      |     |     |            |
| UNSB01.fasta                                                                                                                                       | Cele-UNSB01_4:17319515 | 4 | 17319515 | 17323871 | 4357 | 66  | 66  | CAAATCAACC |
| CAAATCAACCTATTGAGTTGACAATGGTTTCTTTTATCAAATTTTTTGAAATTTTAAAGAAAACA                                                                                  |                        |   |          |          |      |     |     |            |
| UNSB01.fasta                                                                                                                                       | Cele-UNSB01_4:17337235 | 4 | 17337235 | 17337502 | 268  | 10  | 11  | CCTACAGTAC |
| CTACAGTACTA                                                                                                                                        |                        |   |          |          |      |     |     |            |
| UNSB01.fasta                                                                                                                                       | Cele-UNSB01_4:17389165 | 4 | 17389165 | 17390089 | 925  | 21  | 44  | GATTGATGGC |
| GATTGATGGCCGAAAGGCTGTTTTCTGAGCATTGTAGATTTTTG                                                                                                       |                        |   |          |          |      |     |     |            |
| UNSB01.fasta                                                                                                                                       | Cele-UNSB01_4:17395956 | 4 | 17395956 | 17396303 | 348  | 5   | 18  | GCACTCCCTA |
| GCACTCCCTATTAGTCTT                                                                                                                                 |                        |   |          |          |      |     |     |            |
| UNSB01.fasta                                                                                                                                       | Cele-UNSB01_4:17401416 | 4 | 17401416 | 17402316 | 901  | 60  | 15  | ACCCATCGTG |
| ACCCATCGTGGTGAG                                                                                                                                    |                        |   |          |          |      |     |     |            |
| UNSB01.fasta                                                                                                                                       | Cele-UNSB01_4:17402400 | 4 | 17402400 | 17402610 | 211  | 6   | 35  | AAATTTTCTG |
| AAATTTTCTGTGAAAAATATTTTGGCGGGAATTT                                                                                                                 |                        |   |          |          |      |     |     |            |
| UNSB01.fasta                                                                                                                                       | Cele-UNSB01_4:17408961 | 4 | 17408961 | 17409411 | 451  | 28  | 15  | TCTCACCACG |
| TCTCACCACGAAAGG                                                                                                                                    |                        |   |          |          |      |     |     |            |
| UNSB01.fasta                                                                                                                                       | Cele-UNSB01_4:17408894 | 4 | 17408894 | 17409724 | 831  | 9   | 37  | ATTCGCCCA  |
| ATTCCAGCCAAAATGTTTTCGAAAAATTAAATTTGA                                                                                                               |                        |   |          |          |      |     |     |            |
| UNSB01.fasta                                                                                                                                       | Cele-UNSB01_4:17523613 | 4 | 17523613 | 17523740 | 128  | 4   | 32  | GAAGAAATTT |
| GAAGAAATTTGAATTCCCGCTAAAATTTTCT                                                                                                                    |                        |   |          |          |      |     |     |            |
| UNSB01.fasta                                                                                                                                       | Cele-UNSB01_4:17545983 | 4 | 17545983 | 17546043 | 61   | 4   | 15  | GTAGATCTTG |
| GTAGATCTTGAAAAAT                                                                                                                                   |                        |   |          |          |      |     |     |            |
| UNSB01.fasta                                                                                                                                       | Cele-UNSB01_4:17584126 | 4 | 17584126 | 17584294 | 169  | 7   | 24  | TCAACAACAA |
| TCAACAACAACAGGAGAAGCTTCT                                                                                                                           |                        |   |          |          |      |     |     |            |
| UNSB01.fasta                                                                                                                                       | Cele-UNSB01_4:17606143 | 4 | 17606143 | 17606220 | 78   | 5   | 15  | TTCCCCTTTT |
| TTCCCCTTTTGTAA                                                                                                                                     |                        |   |          |          |      |     |     |            |
| UNSB01.fasta                                                                                                                                       | Cele-UNSB01_4:17753355 | 4 | 17753355 | 17753780 | 426  | 17  | 25  | AGCCAGAGAG |
| AGCCAGAGAGTAAATAAACTGTGA                                                                                                                           |                        |   |          |          |      |     |     |            |
| UNSB01.fasta                                                                                                                                       | Cele-UNSB01_4:17753798 | 4 | 17753798 | 17754998 | 1201 | 48  | 25  | ACTCTCTGGC |
| ACTCTCTGGCTTCACCGTATATTTT                                                                                                                          |                        |   |          |          |      |     |     |            |
| UNSB01.fasta                                                                                                                                       | Cele-UNSB01_4:17755008 | 4 | 17755008 | 17759186 | 4179 | 342 | 12  | TTAGGCTTAG |
| TTAGGCTTAGGC                                                                                                                                       |                        |   |          |          |      |     |     |            |
| UNSB01.fasta                                                                                                                                       | Cele-UNSB01_5:4        | 5 | 4        | 5075     | 5072 | 419 | 12  | AAGCCTAAGC |
| AAGCCTAAGCCT                                                                                                                                       |                        |   |          |          |      |     |     |            |
| UNSB01.fasta                                                                                                                                       | Cele-UNSB01_5:105361   | 5 | 105361   | 105451   | 91   | 6   | 15  | AAAAGGAGAA |
| AAAAGGAGAAATTACG                                                                                                                                   |                        |   |          |          |      |     |     |            |
| UNSB01.fasta                                                                                                                                       | Cele-UNSB01_5:105684   | 5 | 105684   | 105774   | 91   | 6   | 15  | TTCTCCTTTT |
| TTCTCCTTTTGGTTG                                                                                                                                    |                        |   |          |          |      |     |     |            |
| UNSB01.fasta                                                                                                                                       | Cele-UNSB01_5:328030   | 5 | 328030   | 329092   | 1063 | 6   | 175 | AAATTTTGGG |
| AAATTTTGGGTTCACTCTTTTACTAGACAGTGATTGTTGCATTGTAGGATTCGGTGGACTTGTCCAACAATTACTTTGGCATGAGTTTAAATAAAAAGGTTTTACCATGAATGAATCAATTTAAATAAAAACCTCGAGAACGAAAA |                        |   |          |          |      |     |     |            |
| CATCCTCAGTAATTTCAATCCTGTTC                                                                                                                         |                        |   |          |          |      |     |     |            |
| UNSB01.fasta                                                                                                                                       | Cele-UNSB01_5:345871   | 5 | 345871   | 345991   | 121  | 7   | 16  | CATGCCTACA |
| CATACCTACATGCCTA                                                                                                                                   |                        |   |          |          |      |     |     |            |
| UNSB01.fasta                                                                                                                                       | Cele-UNSB01_5:353635   | 5 | 353635   | 353859   | 225  | 14  | 16  | GGCATGTAGG |
| GGCATGTAGGCATGTA                                                                                                                                   |                        |   |          |          |      |     |     |            |
| UNSB01.fasta                                                                                                                                       | Cele-UNSB01_5:376477   | 5 | 376477   | 376531   | 55   | 4   | 12  | AGGCTTAGGC |
| AGGCTTAGGCTA                                                                                                                                       |                        |   |          |          |      |     |     |            |
| UNSB01.fasta                                                                                                                                       | Cele-UNSB01_5:786342   | 5 | 786342   | 786547   | 206  | 6   | 34  | CAATTTGCCG |
| CAATTTGCCGATTTACCCGAAATTTTCGATTCCGG                                                                                                                |                        |   |          |          |      |     |     |            |
| UNSB01.fasta                                                                                                                                       | Cele-UNSB01_5:786696   | 5 | 786696   | 786877   | 182  | 5   | 35  | TTTCCGGCAA |
| TTTCCGGTAAATCGGCCAATTGCCGGAATTGAAGA                                                                                                                |                        |   |          |          |      |     |     |            |
| UNSB01.fasta                                                                                                                                       | Cele-UNSB01_5:788141   | 5 | 788141   | 788221   | 81   | 5   | 16  | CTACATGCCT |
| CTACATGCCTACATGC                                                                                                                                   |                        |   |          |          |      |     |     |            |
| UNSB01.fasta                                                                                                                                       | Cele-UNSB01_5:788660   | 5 | 788660   | 789185   | 526  | 12  | 16  | AGGCATGTAG |
| AGGTATGTAGGCATGT                                                                                                                                   |                        |   |          |          |      |     |     |            |
| UNSB01.fasta                                                                                                                                       | Cele-UNSB01_5:790113   | 5 | 790113   | 790281   | 169  | 10  | 16  | AGGCATGTAG |
| AGGCATGTAGGCATGT                                                                                                                                   |                        |   |          |          |      |     |     |            |
| UNSB01.fasta                                                                                                                                       | Cele-UNSB01_5:853469   | 5 | 853469   | 853759   | 291  | 23  | 10  | GGCGTCAGCG |
| GGCGTCAGCG                                                                                                                                         |                        |   |          |          |      |     |     |            |



|                                                                                                                                                    |                       |   |         |         |       |     |     |            |
|----------------------------------------------------------------------------------------------------------------------------------------------------|-----------------------|---|---------|---------|-------|-----|-----|------------|
| UNSB01.fasta                                                                                                                                       | Cele-UNSB01_5:896085  | 5 | 896085  | 896285  | 201   | 12  | 16  | ATGCCTACAT |
| ATGCCTAGATGCCTAG                                                                                                                                   |                       |   |         |         |       |     |     |            |
| UNSB01.fasta                                                                                                                                       | Cele-UNSB01_5:915117  | 5 | 915117  | 915271  | 155   | 7   | 20  | CCTACCCCAG |
| CCTACCCCAGGCTGACCTAG                                                                                                                               |                       |   |         |         |       |     |     |            |
| UNSB01.fasta                                                                                                                                       | Cele-UNSB01_5:915226  | 5 | 915226  | 915380  | 155   | 8   | 20  | GGCAGACCTA |
| GGCAGGCCTAACCTACCCCA                                                                                                                               |                       |   |         |         |       |     |     |            |
| UNSB01.fasta                                                                                                                                       | Cele-UNSB01_5:978655  | 5 | 978655  | 978943  | 289   | 7   | 35  | TGCCGATTTG |
| TGCCGATTTGCCGAAATGTTCAATTTTCGAGAATT                                                                                                                |                       |   |         |         |       |     |     |            |
| UNSB01.fasta                                                                                                                                       | Cele-UNSB01_5:1026357 | 5 | 1026357 | 1026873 | 517   | 9   | 35  | GCATTTGCCG |
| GCATTTGCCGTTTCGAAATTTTCGGCAATTTTCG                                                                                                                 |                       |   |         |         |       |     |     |            |
| UNSB01.fasta                                                                                                                                       | Cele-UNSB01_5:1035824 | 5 | 1035824 | 1036308 | 485   | 20  | 22  | ACAGTACTCC |
| ACAGTACTCCTACAGTACCACT                                                                                                                             |                       |   |         |         |       |     |     |            |
| UNSB01.fasta                                                                                                                                       | Cele-UNSB01_5:1038307 | 5 | 1038307 | 1038528 | 222   | 11  | 13  | GCCTATGGCC |
| GCCTATGGCAAAC                                                                                                                                      |                       |   |         |         |       |     |     |            |
| UNSB01.fasta                                                                                                                                       | Cele-UNSB01_5:1039029 | 5 | 1039029 | 1039263 | 235   | 18  | 13  | CGTAGGCCAT |
| CGTAGGCCATATA                                                                                                                                      |                       |   |         |         |       |     |     |            |
| UNSB01.fasta                                                                                                                                       | Cele-UNSB01_5:1057921 | 5 | 1057921 | 1058017 | 97    | 6   | 18  | AAGCCTAAGC |
| AAGCCTAAGTCTAAATCT                                                                                                                                 |                       |   |         |         |       |     |     |            |
| UNSB01.fasta                                                                                                                                       | Cele-UNSB01_5:1115366 | 5 | 1115366 | 1136806 | 21441 | 722 | 27  | TCTGTGGCTT |
| TCTGTGGCTTCACAGATTAAGTTACTC                                                                                                                        |                       |   |         |         |       |     |     |            |
| UNSB01.fasta                                                                                                                                       | Cele-UNSB01_5:1161256 | 5 | 1161256 | 1161400 | 145   | 10  | 12  | GGCTTAGGCT |
| GGCTTCGGCTTA                                                                                                                                       |                       |   |         |         |       |     |     |            |
| UNSB01.fasta                                                                                                                                       | Cele-UNSB01_5:1174135 | 5 | 1174135 | 1174237 | 103   | 5   | 12  | CTAAGCCTAA |
| CTGAGCCTAAGC                                                                                                                                       |                       |   |         |         |       |     |     |            |
| UNSB01.fasta                                                                                                                                       | Cele-UNSB01_5:1229040 | 5 | 1229040 | 1229117 | 78    | 5   | 15  | CGAAAAGGGG |
| CGAAAAGGGGATCTG                                                                                                                                    |                       |   |         |         |       |     |     |            |
| UNSB01.fasta                                                                                                                                       | Cele-UNSB01_5:1229292 | 5 | 1229292 | 1229367 | 76    | 5   | 15  | TCCCCTTTTC |
| TCCCCTTTTCGTATC                                                                                                                                    |                       |   |         |         |       |     |     |            |
| UNSB01.fasta                                                                                                                                       | Cele-UNSB01_5:1233778 | 5 | 1233778 | 1237846 | 4069  | 22  | 185 | AATATAAACA |
| AATATAAACATACAGAAATTGTCTGATGTATAAAGATTCCCGAAGACACTTCCAATTACCCAAATTGTTTCATATTCTAAATGAGATTCTCTTACTAGAACTCTTGGCCAATGTACGCAGCCGAACGTATCATAAGTGAATACAGA |                       |   |         |         |       |     |     |            |
| ACACCAAGTTATGTCCGAGCAAAAAGATCCGATTAG                                                                                                               |                       |   |         |         |       |     |     |            |
| UNSB01.fasta                                                                                                                                       | Cele-UNSB01_5:1262246 | 5 | 1262246 | 1262294 | 49    | 4   | 12  | AAGCCTAAGC |
| AAGCCTAAGCCT                                                                                                                                       |                       |   |         |         |       |     |     |            |
| UNSB01.fasta                                                                                                                                       | Cele-UNSB01_5:1265623 | 5 | 1265623 | 1265875 | 253   | 19  | 12  | AAGCCTAAGC |
| AAGCCTAAGCCT                                                                                                                                       |                       |   |         |         |       |     |     |            |
| UNSB01.fasta                                                                                                                                       | Cele-UNSB01_5:1271695 | 5 | 1271695 | 1271973 | 279   | 15  | 12  | CTAAGCCTAA |
| CTAGGCCTAAAC                                                                                                                                       |                       |   |         |         |       |     |     |            |
| UNSB01.fasta                                                                                                                                       | Cele-UNSB01_5:1274939 | 5 | 1274939 | 1275298 | 360   | 10  | 35  | GAAATTTTCA |
| GAAATTTTCAATTTTCGGCAAATTGCCAAATTGCCA                                                                                                               |                       |   |         |         |       |     |     |            |
| UNSB01.fasta                                                                                                                                       | Cele-UNSB01_5:1278621 | 5 | 1278621 | 1278717 | 97    | 7   | 12  | CTTAGGCTTA |
| CTTAGGCTTAGT                                                                                                                                       |                       |   |         |         |       |     |     |            |
| UNSB01.fasta                                                                                                                                       | Cele-UNSB01_5:1284626 | 5 | 1284626 | 1284947 | 322   | 10  | 11  | TACCTACTAG |
| TACCTACTGGA                                                                                                                                        |                       |   |         |         |       |     |     |            |
| UNSB01.fasta                                                                                                                                       | Cele-UNSB01_5:1289399 | 5 | 1289399 | 1289474 | 76    | 5   | 15  | TCGTGGTGAG |
| TCGTGGTGAGACCCT                                                                                                                                    |                       |   |         |         |       |     |     |            |
| UNSB01.fasta                                                                                                                                       | Cele-UNSB01_5:1289402 | 5 | 1289402 | 1291686 | 2285  | 44  | 15  | TGGTGAGACC |
| TGGTGAGACCCTTCG                                                                                                                                    |                       |   |         |         |       |     |     |            |
| UNSB01.fasta                                                                                                                                       | Cele-UNSB01_5:1289520 | 5 | 1289520 | 1292435 | 2916  | 32  | 35  | GCGGGAAATT |
| GCGGGAAATTCAAATTTTCAGTGAAAAAATTTTG                                                                                                                 |                       |   |         |         |       |     |     |            |
| UNSB01.fasta                                                                                                                                       | Cele-UNSB01_5:1308044 | 5 | 1308044 | 1308391 | 348   | 8   | 35  | AATTCTGGCA |
| AATTCTGGCAAATTACCGATTTGCCGGAATTTTC                                                                                                                 |                       |   |         |         |       |     |     |            |
| UNSB01.fasta                                                                                                                                       | Cele-UNSB01_5:1308547 | 5 | 1308547 | 1312321 | 3775  | 192 | 20  | AAAATAGATT |
| AAAATAGATTGTTACACGAA                                                                                                                               |                       |   |         |         |       |     |     |            |
| UNSB01.fasta                                                                                                                                       | Cele-UNSB01_5:1343973 | 5 | 1343973 | 1344069 | 97    | 7   | 12  | AGGCTTAGGC |
| AGGCTTAGGCTC                                                                                                                                       |                       |   |         |         |       |     |     |            |
| UNSB01.fasta                                                                                                                                       | Cele-UNSB01_5:1379498 | 5 | 1379498 | 1379672 | 175   | 13  | 12  | CTAAGCCTAA |
| CTAAGCTTAAGC                                                                                                                                       |                       |   |         |         |       |     |     |            |
| UNSB01.fasta                                                                                                                                       | Cele-UNSB01_5:1390382 | 5 | 1390382 | 1390822 | 441   | 9   | 40  | AATGTTCTAG |
| AATGTTCTAGACCCTTCTGGACAACCTCGTGAAAATTTCTGA                                                                                                         |                       |   |         |         |       |     |     |            |

|                                                                                                                                                  |                       |   |         |         |       |     |     |             |
|--------------------------------------------------------------------------------------------------------------------------------------------------|-----------------------|---|---------|---------|-------|-----|-----|-------------|
| UNSB01.fasta                                                                                                                                     | Cele-UNSB01_5:1393460 | 5 | 1393460 | 1393720 | 261   | 6   | 40  | CTAGAACATT  |
| CTAGAACTTTCCAGAATTTTCTCAAACTTTCTAGAAGGTT                                                                                                         |                       |   |         |         |       |     |     |             |
| UNSB01.fasta                                                                                                                                     | Cele-UNSB01_5:1406535 | 5 | 1406535 | 1406737 | 203   | 6   | 34  | AAATTCAAAT  |
| AAATTCAAATTTTCTGAGAAATAAATTTGACGGA                                                                                                               |                       |   |         |         |       |     |     |             |
| UNSB01.fasta                                                                                                                                     | Cele-UNSB01_5:1415140 | 5 | 1415140 | 1415840 | 701   | 21  | 35  | ATTTTCAATT  |
| ATTTTCAATTCCAGCAATTTGCCGATTTTCTTGAA                                                                                                              |                       |   |         |         |       |     |     |             |
| UNSB01.fasta                                                                                                                                     | Cele-UNSB01_5:1423918 | 5 | 1423918 | 1424416 | 499   | 9   | 35  | TTTGCCGGAA  |
| TTTGCCGGAAATTTCAATTCGGCAAAATGTGGA                                                                                                                |                       |   |         |         |       |     |     |             |
| UNSB01.fasta                                                                                                                                     | Cele-UNSB01_5:1427061 | 5 | 1427061 | 1427411 | 351   | 8   | 35  | TGCCGGAAAT  |
| TGCCGGAAATTTTGATTTTGGTAATTTGCCGATT                                                                                                               |                       |   |         |         |       |     |     |             |
| UNSB01.fasta                                                                                                                                     | Cele-UNSB01_5:1441594 | 5 | 1441594 | 1441873 | 280   | 7   | 40  | ATTTTTCTAG  |
| ATTTTTCTAGAAAGTTCTGGAACATTCCAGACTTTTCCA                                                                                                          |                       |   |         |         |       |     |     |             |
| UNSB01.fasta                                                                                                                                     | Cele-UNSB01_5:1441948 | 5 | 1441948 | 1442263 | 316   | 21  | 15  | CGATGGGTCT  |
| CGATGGGTCTCACCA                                                                                                                                  |                       |   |         |         |       |     |     |             |
| UNSB01.fasta                                                                                                                                     | Cele-UNSB01_5:1442495 | 5 | 1442495 | 1442763 | 269   | 8   | 11  | CTACAGTACC  |
| CTACAGTACTA                                                                                                                                      |                       |   |         |         |       |     |     |             |
| UNSB01.fasta                                                                                                                                     | Cele-UNSB01_5:1461442 | 5 | 1461442 | 1461802 | 361   | 24  | 12  | CCTAAGCCTA  |
| CCTAAGCCTAAG                                                                                                                                     |                       |   |         |         |       |     |     |             |
| UNSB01.fasta                                                                                                                                     | Cele-UNSB01_5:1519749 | 5 | 1519749 | 1519965 | 217   | 10  | 12  | AGCCTAAGCC  |
| AGCCTAAGCCTA                                                                                                                                     |                       |   |         |         |       |     |     |             |
| UNSB01.fasta                                                                                                                                     | Cele-UNSB01_5:1568984 | 5 | 1568984 | 1569144 | 161   | 4   | 40  | GTTCTAGAAC  |
| GTTCTAGAACGTTCCAGAATTTTCTCGAATTTACCAGGAA                                                                                                         |                       |   |         |         |       |     |     |             |
| UNSB01.fasta                                                                                                                                     | Cele-UNSB01_5:1577782 | 5 | 1577782 | 1578190 | 409   | 5   | 89  | GCACTACGTT  |
| GCACAACGTTGTGCACACACTAAGCTACTCGTTTCAGCCAGCTACGGAACCCCTAAACGTGTGCGCCGCTCCAAAAGCTACCTTCTT                                                          |                       |   |         |         |       |     |     |             |
| UNSB01.fasta                                                                                                                                     | Cele-UNSB01_5:1676007 | 5 | 1676007 | 1687585 | 11579 | 242 | 48  | AATTTCTGAA  |
| AATTTCTGAAGATGAGCAATTTAAATTTTGAGTTGCCCGTAATTTATA                                                                                                 |                       |   |         |         |       |     |     |             |
| UNSB01.fasta                                                                                                                                     | Cele-UNSB01_5:1707873 | 5 | 1707873 | 1707951 | 79    | 5   | 18  | GCCTAAGCCT  |
| GCCTAGGCCTACAACCTA                                                                                                                               |                       |   |         |         |       |     |     |             |
| UNSB01.fasta                                                                                                                                     | Cele-UNSB01_5:1765405 | 5 | 1765405 | 1765535 | 131   | 9   | 13  | GCTCAAGCTA  |
| GCTCAAGCTAAGA                                                                                                                                    |                       |   |         |         |       |     |     |             |
| UNSB01.fasta                                                                                                                                     | Cele-UNSB01_5:1860337 | 5 | 1860337 | 1860547 | 211   | 7   | 35  | TCCGGCAATT  |
| TCCGGCAATTTTCCGATTTGCCGTAATTTTAAAT                                                                                                               |                       |   |         |         |       |     |     |             |
| UNSB01.fasta                                                                                                                                     | Cele-UNSB01_5:1872631 | 5 | 1872631 | 1872733 | 103   | 7   | 12  | AGCCTGAGCC  |
| AGCCTGAGCCTG                                                                                                                                     |                       |   |         |         |       |     |     |             |
| UNSB01.fasta                                                                                                                                     | Cele-UNSB01_5:1895975 | 5 | 1895975 | 1896260 | 286   | 14  | 17  | TAAGCCTAAG  |
| TGAGCCTAAGCTTAGCT                                                                                                                                |                       |   |         |         |       |     |     |             |
| UNSB01.fasta                                                                                                                                     | Cele-UNSB01_5:1897354 | 5 | 1897354 | 1897674 | 321   | 23  | 10  | GGGCGTCAGC  |
| GGGCGTCAGC                                                                                                                                       |                       |   |         |         |       |     |     |             |
| UNSB01.fasta                                                                                                                                     | Cele-UNSB01_5:1955153 | 5 | 1955153 | 1955723 | 571   | 7   | 93  | CAGTACCCTC  |
| CAGTACCCCTCAAGGATCATCTGCTCCACGGTATCCTGGTAACATACATGCCTTTGCCAGCACTTCCGATGCTCCACAGTATCCAGGATCCTCC                                                   |                       |   |         |         |       |     |     |             |
| UNSB01.fasta                                                                                                                                     | Cele-UNSB01_5:1958361 | 5 | 1958361 | 1958506 | 146   | 7   | 11  | CTACAGTACT  |
| CTACAGTACTA                                                                                                                                      |                       |   |         |         |       |     |     |             |
| UNSB01.fasta                                                                                                                                     | Cele-UNSB01_5:1987432 | 5 | 1987432 | 1987712 | 281   | 8   | 35  | GGCAAAATCGG |
| GGCAAAATCGGCAATTTCCGAAAATGAAAGTTTCC                                                                                                              |                       |   |         |         |       |     |     |             |
| UNSB01.fasta                                                                                                                                     | Cele-UNSB01_5:2151047 | 5 | 2151047 | 2151352 | 306   | 21  | 13  | GCCTAAGCCT  |
| GCTTAAGCCTCGG                                                                                                                                    |                       |   |         |         |       |     |     |             |
| UNSB01.fasta                                                                                                                                     | Cele-UNSB01_5:2189835 | 5 | 2189835 | 2190349 | 515   | 18  | 11  | CTACAGTACC  |
| CTACAGTACTA                                                                                                                                      |                       |   |         |         |       |     |     |             |
| UNSB01.fasta                                                                                                                                     | Cele-UNSB01_5:2213030 | 5 | 2213030 | 2213142 | 113   | 6   | 16  | ATGCCTACAT  |
| ATGCCTACATGCCTAC                                                                                                                                 |                       |   |         |         |       |     |     |             |
| UNSB01.fasta                                                                                                                                     | Cele-UNSB01_5:2439353 | 5 | 2439353 | 2440062 | 710   | 4   | 177 | GAGTCTCACG  |
| GAGTCTCACGATGTGTCAACGTGTCTCAGTCGGCTTGATCTACGTAGATCTACAAAAATGCGGGAGAAGAGACGCAGACTTATTCTCTGATTTGCATGAGTAAGAGCGTGTGGCGTCACATTTTGTGCGCAAAAAATCCCCGAT |                       |   |         |         |       |     |     |             |
| TTTTTTGTAGATCAAACCGTAATGGGACG                                                                                                                    |                       |   |         |         |       |     |     |             |
| UNSB01.fasta                                                                                                                                     | Cele-UNSB01_5:2441369 | 5 | 2441369 | 2441565 | 197   | 4   | 35  | AAATTTTCAA  |
| AAATTTTCAATTCTCCAGTTTGCCAATTTGCCGG                                                                                                               |                       |   |         |         |       |     |     |             |
| UNSB01.fasta                                                                                                                                     | Cele-UNSB01_5:2444425 | 5 | 2444425 | 2444473 | 49    | 4   | 12  | AGGCTTAGGC  |
| AGGCTTAAGCTC                                                                                                                                     |                       |   |         |         |       |     |     |             |
| UNSB01.fasta                                                                                                                                     | Cele-UNSB01_5:2527844 | 5 | 2527844 | 2527991 | 148   | 6   | 12  | CCTAAGCCTA  |
| CCTAGGCCTAAA                                                                                                                                     |                       |   |         |         |       |     |     |             |

|                                                           |                       |   |         |         |      |     |    |            |
|-----------------------------------------------------------|-----------------------|---|---------|---------|------|-----|----|------------|
| UNSB01.fasta                                              | Cele-UNSB01_5:2582229 | 5 | 2582229 | 2582433 | 205  | 7   | 20 | CCCCGACGCT |
| CCCCGACGCTCGAGCTCAAA                                      |                       |   |         |         |      |     |    |            |
| UNSB01.fasta                                              | Cele-UNSB01_5:2582360 | 5 | 2582360 | 2582560 | 201  | 10  | 20 | GCTCGAGCTC |
| GCTCGAGCTCAAACCCCGAC                                      |                       |   |         |         |      |     |    |            |
| UNSB01.fasta                                              | Cele-UNSB01_5:2584213 | 5 | 2584213 | 2584387 | 175  | 6   | 21 | GATTAGATTT |
| GATTAGATTTCGACCATATTG                                     |                       |   |         |         |      |     |    |            |
| UNSB01.fasta                                              | Cele-UNSB01_5:2587851 | 5 | 2587851 | 2588904 | 1054 | 15  | 35 | TCAATTCCGG |
| TCAATTCCGGCAATTTTCCGATTGCGCGAAATTG                        |                       |   |         |         |      |     |    |            |
| UNSB01.fasta                                              | Cele-UNSB01_5:2602720 | 5 | 2602720 | 2603297 | 578  | 16  | 35 | TTTGCCGGAA |
| TTTGCCGGAAATTTTCAATTCGACAATTTGCCGG                        |                       |   |         |         |      |     |    |            |
| UNSB01.fasta                                              | Cele-UNSB01_5:2608578 | 5 | 2608578 | 2609028 | 451  | 10  | 35 | TTTCCGGCAA |
| TTTCCGGCAAATCGGAAAAGTGTCGAAGTTTAAAA                       |                       |   |         |         |      |     |    |            |
| UNSB01.fasta                                              | Cele-UNSB01_5:2619946 | 5 | 2619946 | 2620165 | 220  | 6   | 35 | GCCGGAAATT |
| GCCGGAAATTTTCAATTCGGCAACTCCCGATT                          |                       |   |         |         |      |     |    |            |
| UNSB01.fasta                                              | Cele-UNSB01_5:2625951 | 5 | 2625951 | 2626161 | 211  | 14  | 15 | CTCACCACGA |
| CTCACCACGAAGGGT                                           |                       |   |         |         |      |     |    |            |
| UNSB01.fasta                                              | Cele-UNSB01_5:2661964 | 5 | 2661964 | 2662120 | 157  | 13  | 12 | CTAAGCCTAA |
| CTAAGCCTAAGC                                              |                       |   |         |         |      |     |    |            |
| UNSB01.fasta                                              | Cele-UNSB01_5:2665615 | 5 | 2665615 | 2665738 | 124  | 4   | 35 | TTTCTCAGAA |
| TTTCTCAGAAATTTGAATTTCCCGCCAAAATGTT                        |                       |   |         |         |      |     |    |            |
| UNSB01.fasta                                              | Cele-UNSB01_5:2726947 | 5 | 2726947 | 2727107 | 161  | 12  | 10 | GCTACCGCCC |
| GCTACCGCCC                                                |                       |   |         |         |      |     |    |            |
| UNSB01.fasta                                              | Cele-UNSB01_5:2726947 | 5 | 2726947 | 2728543 | 1597 | 110 | 10 | GCTACCGCCC |
| GCTACCGCCC                                                |                       |   |         |         |      |     |    |            |
| UNSB01.fasta                                              | Cele-UNSB01_5:2836474 | 5 | 2836474 | 2836692 | 219  | 20  | 11 | GCACATTTTT |
| GCACATTTTT                                                |                       |   |         |         |      |     |    |            |
| UNSB01.fasta                                              | Cele-UNSB01_5:3006278 | 5 | 3006278 | 3006868 | 591  | 10  | 59 | AATTTCAAAT |
| AATTTCAAATGTGCACTGGTTTTCAAAAATTTTAACTGAGAATTATGGAAAATTGGG |                       |   |         |         |      |     |    |            |
| UNSB01.fasta                                              | Cele-UNSB01_5:3035465 | 5 | 3035465 | 3035958 | 494  | 4   | 16 | GCATGTAGGC |
| GCATGTAGGCATGTAG                                          |                       |   |         |         |      |     |    |            |
| UNSB01.fasta                                              | Cele-UNSB01_5:3042873 | 5 | 3042873 | 3042939 | 67   | 5   | 11 | TTTGGCAAGA |
| TTTGGCAAGAA                                               |                       |   |         |         |      |     |    |            |
| UNSB01.fasta                                              | Cele-UNSB01_5:3102518 | 5 | 3102518 | 3102978 | 461  | 41  | 10 | GGTAGCGGGC |
| GATAGCGGGC                                                |                       |   |         |         |      |     |    |            |
| UNSB01.fasta                                              | Cele-UNSB01_5:3289995 | 5 | 3289995 | 3290260 | 266  | 4   | 18 | TGCAAGACTA |
| TGCAAGACTATTAGAGGC                                        |                       |   |         |         |      |     |    |            |
| UNSB01.fasta                                              | Cele-UNSB01_5:3330728 | 5 | 3330728 | 3331463 | 736  | 20  | 21 | CTAACATTTT |
| CTAACATTTTCAATTTTCGT                                      |                       |   |         |         |      |     |    |            |
| UNSB01.fasta                                              | Cele-UNSB01_5:3492580 | 5 | 3492580 | 3492838 | 259  | 7   | 11 | TACTGTAGGA |
| TACTGTAGAGG                                               |                       |   |         |         |      |     |    |            |
| UNSB01.fasta                                              | Cele-UNSB01_5:3492923 | 5 | 3492923 | 3493163 | 241  | 6   | 40 | TCCAGAACCT |
| TCCAGAACCTTCTGGAAAATCCGAGAAAATTCTGGAATGT                  |                       |   |         |         |      |     |    |            |
| UNSB01.fasta                                              | Cele-UNSB01_5:3493344 | 5 | 3493344 | 3494338 | 995  | 31  | 32 | CGGGAATTCA |
| CGGGAATTCAACATTTCTGTGAAAAATTTGG                           |                       |   |         |         |      |     |    |            |
| UNSB01.fasta                                              | Cele-UNSB01_5:3593686 | 5 | 3593686 | 3593761 | 76   | 5   | 15 | CGTGGTGAGA |
| CGTGGCGAGACCCAC                                           |                       |   |         |         |      |     |    |            |
| UNSB01.fasta                                              | Cele-UNSB01_5:3602166 | 5 | 3602166 | 3602210 | 45   | 4   | 11 | CAAAAAATGT |
| CAAAAAATGTG                                               |                       |   |         |         |      |     |    |            |
| UNSB01.fasta                                              | Cele-UNSB01_5:3604514 | 5 | 3604514 | 3604619 | 106  | 5   | 21 | TTTCAGTTTT |
| TTTCAGTTTTCGTCTAACATT                                     |                       |   |         |         |      |     |    |            |
| UNSB01.fasta                                              | Cele-UNSB01_5:3623960 | 5 | 3623960 | 3624037 | 78   | 4   | 21 | AGTTTGTAGT |
| AGTCTGTAGTTTGTCTGTTTGT                                    |                       |   |         |         |      |     |    |            |
| UNSB01.fasta                                              | Cele-UNSB01_5:3651691 | 5 | 3651691 | 3651860 | 170  | 4   | 42 | TTTCCAGCAA |
| TTTCCAGAAATATCGGCAAGTCAGTGATTGCGCGAATTGAGA                |                       |   |         |         |      |     |    |            |
| UNSB01.fasta                                              | Cele-UNSB01_5:3666468 | 5 | 3666468 | 3666780 | 313  | 8   | 39 | GATTTACGGG |
| GATTTACGGGCTTTAATCAGTTTCGAAAAAGCTTGCGTC                   |                       |   |         |         |      |     |    |            |
| UNSB01.fasta                                              | Cele-UNSB01_5:3674779 | 5 | 3674779 | 3675094 | 316  | 9   | 35 | AAAATTTCCG |
| AAAATTTCCGGCAAACAGGCAACTTGCCGGAATTG                       |                       |   |         |         |      |     |    |            |

|                                                                                                                                                  |                       |   |         |         |      |     |     |             |
|--------------------------------------------------------------------------------------------------------------------------------------------------|-----------------------|---|---------|---------|------|-----|-----|-------------|
| UNSB01.fasta                                                                                                                                     | Cele-UNSB01_5:3703054 | 5 | 3703054 | 3703534 | 481  | 23  | 11  | AGGATTACTG  |
| AGGATTACTGT                                                                                                                                      |                       |   |         |         |      |     |     |             |
| UNSB01.fasta                                                                                                                                     | Cele-UNSB01_5:3735730 | 5 | 3735730 | 3736160 | 431  | 4   | 35  | GCCGATTTGC  |
| GCCGATTTGCCGGAATGTTTCAGTTCTGGCAAATT                                                                                                              |                       |   |         |         |      |     |     |             |
| UNSB01.fasta                                                                                                                                     | Cele-UNSB01_5:3737155 | 5 | 3737155 | 3737311 | 157  | 4   | 35  | TTGCCGATTT  |
| TTGCAGATTTGCCGAAAAATTCAATTCGGCAAT                                                                                                                |                       |   |         |         |      |     |     |             |
| UNSB01.fasta                                                                                                                                     | Cele-UNSB01_5:3739928 | 5 | 3739928 | 3740028 | 101  | 6   | 10  | TAGCCATGCC  |
| TAGCCATGCC                                                                                                                                       |                       |   |         |         |      |     |     |             |
| UNSB01.fasta                                                                                                                                     | Cele-UNSB01_5:3789009 | 5 | 3789009 | 3789261 | 253  | 6   | 42  | ACCGGCAATT  |
| ACCGGAAATTGCCGGAATTGTCGATTGCTGAAAATTTCCAAA                                                                                                       |                       |   |         |         |      |     |     |             |
| UNSB01.fasta                                                                                                                                     | Cele-UNSB01_5:4001570 | 5 | 4001570 | 4002151 | 582  | 5   | 42  | CCAGCCGACA  |
| CCAGCCGACAGCCGAAATTTTCACTATTTTCGGCTGGTGCCA                                                                                                       |                       |   |         |         |      |     |     |             |
| UNSB01.fasta                                                                                                                                     | Cele-UNSB01_5:4022711 | 5 | 4022711 | 4023271 | 561  | 14  | 40  | GAACCTTCTG  |
| GAACCTTCTGAAAAATTCGAAAAATCTGAAATGTTCTA                                                                                                           |                       |   |         |         |      |     |     |             |
| UNSB01.fasta                                                                                                                                     | Cele-UNSB01_5:4024546 | 5 | 4024546 | 4025389 | 844  | 21  | 40  | CTAGAAAAGTT |
| CTAGAAATGTTCTGGAACATTTCTAGAATTTCTTGAATTTT                                                                                                        |                       |   |         |         |      |     |     |             |
| UNSB01.fasta                                                                                                                                     | Cele-UNSB01_5:4025406 | 5 | 4025406 | 4025890 | 485  | 15  | 32  | TTTCACAGAA  |
| TTTCACAGAAAATTTGAATTCCTGCCAAAATT                                                                                                                 |                       |   |         |         |      |     |     |             |
| UNSB01.fasta                                                                                                                                     | Cele-UNSB01_5:4118450 | 5 | 4118450 | 4118598 | 149  | 4   | 35  | TTTGCCGGAA  |
| TTTGCCGGAAATTTTCTTTTGGTAAATTGCTGT                                                                                                                |                       |   |         |         |      |     |     |             |
| UNSB01.fasta                                                                                                                                     | Cele-UNSB01_5:4162356 | 5 | 4162356 | 4162767 | 412  | 11  | 35  | TTCCGGCAAA  |
| TTCCGGCAAAACCGCAATTTCCCGAAAAACGAAAAA                                                                                                             |                       |   |         |         |      |     |     |             |
| UNSB01.fasta                                                                                                                                     | Cele-UNSB01_5:4165711 | 5 | 4165711 | 4166017 | 307  | 5   | 35  | AATTTTCAAT  |
| AATTTTAAATTCCTGCAATTTGCCAGTTTGCCAGA                                                                                                              |                       |   |         |         |      |     |     |             |
| UNSB01.fasta                                                                                                                                     | Cele-UNSB01_5:4169850 | 5 | 4169850 | 4170172 | 323  | 8   | 35  | TTTCAATTCC  |
| TTTCAATTCCGGAAGTTTGCCGATTGCGGAAAT                                                                                                                |                       |   |         |         |      |     |     |             |
| UNSB01.fasta                                                                                                                                     | Cele-UNSB01_5:4216093 | 5 | 4216093 | 4219558 | 3466 | 18  | 200 | TGTGGTCCAG  |
| TGTGGTCCAGAAGGTATGACTAAAAATTCACTTTCTGCTTGAACCTGGCAGATTTTAAATTTTGTGAAATGCCGTTTCAAATCTGAAAGAACTTAAATTTGCTACAAAATGGCTACTGGAATTTCTGAAAAAGTTAGTTTCAAG |                       |   |         |         |      |     |     |             |
| CCAGAAATTAATATTCAAAGTTTGAAAAATCTATTAATTTGCATAAATAT                                                                                               |                       |   |         |         |      |     |     |             |
| UNSB01.fasta                                                                                                                                     | Cele-UNSB01_5:4240718 | 5 | 4240718 | 4240800 | 83   | 4   | 18  | AAATATTCTT  |
| AAATATTCTTATTTTTCAG                                                                                                                              |                       |   |         |         |      |     |     |             |
| UNSB01.fasta                                                                                                                                     | Cele-UNSB01_5:4305444 | 5 | 4305444 | 4315394 | 9951 | 398 | 25  | AGTAAAAATAT |
| AGTAAAAATATTCTGTGAAGCCAGAG                                                                                                                       |                       |   |         |         |      |     |     |             |
| UNSB01.fasta                                                                                                                                     | Cele-UNSB01_5:4422681 | 5 | 4422681 | 4422875 | 195  | 5   | 35  | ATTCCGGCAA  |
| ATTCCGGCAATTTGCCGATCTGCCGGACCTATTAA                                                                                                              |                       |   |         |         |      |     |     |             |
| UNSB01.fasta                                                                                                                                     | Cele-UNSB01_5:4531686 | 5 | 4531686 | 4531763 | 78   | 5   | 15  | CCCCTTTTCG  |
| CCCCTTTTCGTATCT                                                                                                                                  |                       |   |         |         |      |     |     |             |
| UNSB01.fasta                                                                                                                                     | Cele-UNSB01_5:4631559 | 5 | 4631559 | 4631760 | 202  | 8   | 18  | CCTGGCTGTC  |
| CCTGGTTGTCCTGGGCCT                                                                                                                               |                       |   |         |         |      |     |     |             |
| UNSB01.fasta                                                                                                                                     | Cele-UNSB01_5:4664068 | 5 | 4664068 | 4664530 | 463  | 10  | 35  | GCAAATCGGC  |
| GCAAATCGGCAAATTGCCGTATTTGAAAATGCCCG                                                                                                              |                       |   |         |         |      |     |     |             |
| UNSB01.fasta                                                                                                                                     | Cele-UNSB01_5:4696924 | 5 | 4696924 | 4697115 | 192  | 5   | 35  | CGGCAAATCG  |
| CGGCAAATTGTCGGAATTGAATATTTCCGACAAAC                                                                                                              |                       |   |         |         |      |     |     |             |
| UNSB01.fasta                                                                                                                                     | Cele-UNSB01_5:4698132 | 5 | 4698132 | 4698369 | 238  | 5   | 35  | CAATTCCGGC  |
| CAATTCGGCAATCTGCCGATTTGCCAGAAAATTA                                                                                                               |                       |   |         |         |      |     |     |             |
| UNSB01.fasta                                                                                                                                     | Cele-UNSB01_5:4751883 | 5 | 4751883 | 4752158 | 276  | 22  | 11  | CACGAAGTTG  |
| CACAAAGTTGT                                                                                                                                      |                       |   |         |         |      |     |     |             |
| UNSB01.fasta                                                                                                                                     | Cele-UNSB01_5:4763134 | 5 | 4763134 | 4763326 | 193  | 11  | 16  | TAGGCATGTA  |
| TAGGCATGTAGGAAAG                                                                                                                                 |                       |   |         |         |      |     |     |             |
| UNSB01.fasta                                                                                                                                     | Cele-UNSB01_5:4844742 | 5 | 4844742 | 4844913 | 172  | 5   | 17  | AAATGCCAAA  |
| AAATGCCAAAACCTGCCA                                                                                                                               |                       |   |         |         |      |     |     |             |
| UNSB01.fasta                                                                                                                                     | Cele-UNSB01_5:4982997 | 5 | 4982997 | 4984483 | 1487 | 35  | 11  | GTACTGTAGG  |
| GTACTGTAGGA                                                                                                                                      |                       |   |         |         |      |     |     |             |
| UNSB01.fasta                                                                                                                                     | Cele-UNSB01_5:4984650 | 5 | 4984650 | 4985356 | 707  | 46  | 15  | TCGTGGTGAG  |
| TCGTGGTGAGATCCT                                                                                                                                  |                       |   |         |         |      |     |     |             |
| UNSB01.fasta                                                                                                                                     | Cele-UNSB01_5:4989154 | 5 | 4989154 | 4989259 | 106  | 7   | 15  | GGGTCTCACC  |
| GGGTCTCACCACGAT                                                                                                                                  |                       |   |         |         |      |     |     |             |
| UNSB01.fasta                                                                                                                                     | Cele-UNSB01_5:5106861 | 5 | 5106861 | 5107246 | 386  | 10  | 35  | TGCCGGAAAT  |
| TGCCGAAAATTTCTTTTCCGGCAACTTGTGCGATT                                                                                                              |                       |   |         |         |      |     |     |             |

|                                                                                                                  |                       |   |         |         |       |     |     |             |
|------------------------------------------------------------------------------------------------------------------|-----------------------|---|---------|---------|-------|-----|-----|-------------|
| UNSB01.fasta                                                                                                     | Cele-UNSB01_5:5114820 | 5 | 5114820 | 5115220 | 401   | 8   | 35  | TTGCCGATTT  |
| TTGCCGATTTGCCGGAACTTTCCAATTTGACAAG                                                                               |                       |   |         |         |       |     |     |             |
| UNSB01.fasta                                                                                                     | Cele-UNSB01_5:5204356 | 5 | 5204356 | 5204779 | 424   | 9   | 35  | CGATTTGCCG  |
| CGATTTGCCGGAATTTTTATTTTGGCAAATTGC                                                                                |                       |   |         |         |       |     |     |             |
| UNSB01.fasta                                                                                                     | Cele-UNSB01_5:5272176 | 5 | 5272176 | 5275211 | 3036  | 112 | 26  | CAGAGTCAC   |
| CAGAGTCACTAATTTTGGTGAACGGT                                                                                       |                       |   |         |         |       |     |     |             |
| UNSB01.fasta                                                                                                     | Cele-UNSB01_5:5413359 | 5 | 5413359 | 5414150 | 792   | 8   | 96  | TCTGCTTAGA  |
| TCTGCTTAGAATAGGATTAAGCCAGCCACAGTTTCAAGAGTATTCGGGCCTGCGGCCCTCAAACCTGGTTATTAGGCTTGAGTGAATAACATA                    |                       |   |         |         |       |     |     |             |
| UNSB01.fasta                                                                                                     | Cele-UNSB01_5:5638035 | 5 | 5638035 | 5638095 | 61    | 4   | 15  | CGTGGTGAGA  |
| CGTGGTGAGACCTT                                                                                                   |                       |   |         |         |       |     |     |             |
| UNSB01.fasta                                                                                                     | Cele-UNSB01_5:5649265 | 5 | 5649265 | 5649420 | 156   | 8   | 19  | AAAAATAGAT  |
| AAAAATAGATTGGCAGACG                                                                                              |                       |   |         |         |       |     |     |             |
| UNSB01.fasta                                                                                                     | Cele-UNSB01_5:5757268 | 5 | 5757268 | 5757343 | 76    | 5   | 15  | CGAAAAGGGG  |
| CAAAAAGGGGATCTG                                                                                                  |                       |   |         |         |       |     |     |             |
| UNSB01.fasta                                                                                                     | Cele-UNSB01_5:5757528 | 5 | 5757528 | 5757620 | 93    | 6   | 15  | TCCCCTTTTC  |
| TCCCCTTTTCGTATC                                                                                                  |                       |   |         |         |       |     |     |             |
| UNSB01.fasta                                                                                                     | Cele-UNSB01_5:5757785 | 5 | 5757785 | 5758298 | 514   | 19  | 27  | TGGAGGCGGC  |
| TGGAGGCGGCTTCTGGCCTGGTGGTGA                                                                                      |                       |   |         |         |       |     |     |             |
| UNSB01.fasta                                                                                                     | Cele-UNSB01_5:6073958 | 5 | 6073958 | 6074258 | 301   | 20  | 15  | ACCCATCGTG  |
| ACCCATCGTGGTGAG                                                                                                  |                       |   |         |         |       |     |     |             |
| UNSB01.fasta                                                                                                     | Cele-UNSB01_5:6074295 | 5 | 6074295 | 6074435 | 141   | 4   | 35  | ATTTTGGCGG  |
| ATTTTGGCGGAAATTTAAATTTTCTGTGAAAAAT                                                                               |                       |   |         |         |       |     |     |             |
| UNSB01.fasta                                                                                                     | Cele-UNSB01_5:6074472 | 5 | 6074472 | 6074951 | 480   | 12  | 40  | TTCCAGAACT  |
| TTCCAGAACTTCTAGAAAAATCGGGAATTTCTGGAATG                                                                           |                       |   |         |         |       |     |     |             |
| UNSB01.fasta                                                                                                     | Cele-UNSB01_5:6179564 | 5 | 6179564 | 6194498 | 14935 | 110 | 117 | TACTTCAGAT  |
| TACTTCAGATGTTTCTTTGATTCCACAGGTGCAAGTTTCTCCTTTGTTGGTTCGACAGTAGTTGCAGTCTCTGGAACTGGAACATCCTTTTGCTCGACGACTGCAGCTTGTG |                       |   |         |         |       |     |     |             |
| UNSB01.fasta                                                                                                     | Cele-UNSB01_5:6199698 | 5 | 6199698 | 6200391 | 694   | 15  | 42  | AGGTGCTGCT  |
| AGGTGCTGCTTCCTTCGGAACATTTTCTTGAGTTGGCTCCGA                                                                       |                       |   |         |         |       |     |     |             |
| UNSB01.fasta                                                                                                     | Cele-UNSB01_5:6230981 | 5 | 6230981 | 6231799 | 819   | 13  | 59  | ATGTGCACTG  |
| ATGTGCACTGGTTTCAAAAAATTTTAACTGAGAATAATGGAGAATATGGAATTTCAA                                                        |                       |   |         |         |       |     |     |             |
| UNSB01.fasta                                                                                                     | Cele-UNSB01_5:6307822 | 5 | 6307822 | 6308103 | 282   | 8   | 35  | AATTTCCCGC  |
| AATTTCCCGCCTTTTACACTGCAAAATTG                                                                                    |                       |   |         |         |       |     |     |             |
| UNSB01.fasta                                                                                                     | Cele-UNSB01_5:6309373 | 5 | 6309373 | 6309654 | 282   | 8   | 35  | AATTTCCCGC  |
| AATTTCCCGCCTTTTACACTGCAAAATTG                                                                                    |                       |   |         |         |       |     |     |             |
| UNSB01.fasta                                                                                                     | Cele-UNSB01_5:6310933 | 5 | 6310933 | 6311214 | 282   | 8   | 35  | AATTTCCCGC  |
| AATTTCCCGCCTTTTACACTGCAAAATTG                                                                                    |                       |   |         |         |       |     |     |             |
| UNSB01.fasta                                                                                                     | Cele-UNSB01_5:6314778 | 5 | 6314778 | 6314883 | 106   | 7   | 15  | GGGTCTCACC  |
| GGGTCTCACCACGAT                                                                                                  |                       |   |         |         |       |     |     |             |
| UNSB01.fasta                                                                                                     | Cele-UNSB01_5:6410601 | 5 | 6410601 | 6410727 | 127   | 6   | 21  | TTGGTGACAA  |
| TTGGTGACAATGTGGAAACAA                                                                                            |                       |   |         |         |       |     |     |             |
| UNSB01.fasta                                                                                                     | Cele-UNSB01_5:6605586 | 5 | 6605586 | 6605676 | 91    | 6   | 15  | GGTGAGACCC  |
| GGTGAGACCCTTCGT                                                                                                  |                       |   |         |         |       |     |     |             |
| UNSB01.fasta                                                                                                     | Cele-UNSB01_5:6928533 | 5 | 6928533 | 6928671 | 139   | 7   | 17  | CTCATTTGCCT |
| CTCATTTGACTACCCTTG                                                                                               |                       |   |         |         |       |     |     |             |
| UNSB01.fasta                                                                                                     | Cele-UNSB01_5:6955453 | 5 | 6955453 | 6955644 | 192   | 10  | 19  | AACAATCTAT  |
| AACAATCTATTTTTTCGTGT                                                                                             |                       |   |         |         |       |     |     |             |
| UNSB01.fasta                                                                                                     | Cele-UNSB01_5:6963271 | 5 | 6963271 | 6963507 | 237   | 4   | 59  | TGGAAATTCA  |
| TGGAAATTCAAGACTTCACTGGTTTTCAAAATTTTAAAACCGAGAATTATGGGGAATA                                                       |                       |   |         |         |       |     |     |             |
| UNSB01.fasta                                                                                                     | Cele-UNSB01_5:6963686 | 5 | 6963686 | 6964031 | 346   | 23  | 15  | AGACCCATCG  |
| AGACCCATCGTGGTG                                                                                                  |                       |   |         |         |       |     |     |             |
| UNSB01.fasta                                                                                                     | Cele-UNSB01_5:6964092 | 5 | 6964092 | 6964484 | 393   | 9   | 35  | CGGGAAATTT  |
| CGGGAAATTTGAATTTTCTGTGAAAAATATTTTGG                                                                              |                       |   |         |         |       |     |     |             |
| UNSB01.fasta                                                                                                     | Cele-UNSB01_5:6964823 | 5 | 6964823 | 6965938 | 1116  | 19  | 59  | ACCAGTGAAG  |
| ACCAGTGAAGTCTTGAATTTCCATATTTCCCAATATTTCTCGGTTTTAAATTTTTTGAAT                                                     |                       |   |         |         |       |     |     |             |
| UNSB01.fasta                                                                                                     | Cele-UNSB01_5:6966002 | 5 | 6966002 | 6966297 | 296   | 5   | 59  | TGGAAATTCA  |
| TGGAAATTCAAGACTTCACTGGTTTTCAGATTTTAAAACCGAGAATTATGGGGAATA                                                        |                       |   |         |         |       |     |     |             |
| UNSB01.fasta                                                                                                     | Cele-UNSB01_5:6966476 | 5 | 6966476 | 6966776 | 301   | 20  | 15  | AGACCCATCG  |
| AGACCCATCGTGGTG                                                                                                  |                       |   |         |         |       |     |     |             |

|                                                                                                                                                     |                       |   |         |         |       |     |     |             |
|-----------------------------------------------------------------------------------------------------------------------------------------------------|-----------------------|---|---------|---------|-------|-----|-----|-------------|
| UNSB01.fasta                                                                                                                                        | Cele-UNSB01_5:6967498 | 5 | 6967498 | 6969084 | 1587  | 27  | 59  | ACCACTGAAG  |
| ACCAGTGAAGCTCTTGAATTGCCATATTCCTCGGTTTTAAATTTTTTGAAA                                                                                                 |                       |   |         |         |       |     |     |             |
| UNSB01.fasta                                                                                                                                        | Cele-UNSB01_5:6969386 | 5 | 6969386 | 6969716 | 331   | 22  | 15  | AGACCCATCG  |
| AGACCCATCGTGGTG                                                                                                                                     |                       |   |         |         |       |     |     |             |
| UNSB01.fasta                                                                                                                                        | Cele-UNSB01_5:6971634 | 5 | 6971634 | 6982576 | 10943 | 186 | 59  | ATGGAAATTC  |
| ATGGAAATTCAGACTTCACTGGTTTTCAAAAAATTTAAACCGAGATATTGGGGAAAT                                                                                           |                       |   |         |         |       |     |     |             |
| UNSB01.fasta                                                                                                                                        | Cele-UNSB01_5:6983222 | 5 | 6983222 | 6984063 | 842   | 56  | 12  | TTTTAATTTT  |
| TTTTAATTTTAA                                                                                                                                        |                       |   |         |         |       |     |     |             |
| UNSB01.fasta                                                                                                                                        | Cele-UNSB01_5:7024350 | 5 | 7024350 | 7024712 | 363   | 11  | 32  | AATTCAAATT  |
| AATTCAAATTTTTTGTGAAAAATTTTGGCGGG                                                                                                                    |                       |   |         |         |       |     |     |             |
| UNSB01.fasta                                                                                                                                        | Cele-UNSB01_5:7301688 | 5 | 7301688 | 7302048 | 361   | 6   | 60  | CTAGCTAGAT  |
| CTAGCTAGATTGAACGCTCTCAAGAGAAAGCATCTGTTGCTGCCACAAGAAGAAGGCT                                                                                          |                       |   |         |         |       |     |     |             |
| UNSB01.fasta                                                                                                                                        | Cele-UNSB01_5:7379892 | 5 | 7379892 | 7380037 | 146   | 8   | 18  | TTTCATAAGA  |
| TTTCATAAGAAGTAAATT                                                                                                                                  |                       |   |         |         |       |     |     |             |
| UNSB01.fasta                                                                                                                                        | Cele-UNSB01_5:7485041 | 5 | 7485041 | 7485201 | 161   | 4   | 40  | GAAGGTTCTA  |
| GAAGGTTCTAGAACATTTTCAGCATTTTCTGAGAATTTCTA                                                                                                           |                       |   |         |         |       |     |     |             |
| UNSB01.fasta                                                                                                                                        | Cele-UNSB01_5:7485330 | 5 | 7485330 | 7487566 | 2237  | 74  | 11  | CTACAGTACC  |
| CTACAGTACTA                                                                                                                                         |                       |   |         |         |       |     |     |             |
| UNSB01.fasta                                                                                                                                        | Cele-UNSB01_5:7745857 | 5 | 7745857 | 7745978 | 122   | 6   | 17  | CTCATTGCCT  |
| CTCATTGACTACCTGTG                                                                                                                                   |                       |   |         |         |       |     |     |             |
| UNSB01.fasta                                                                                                                                        | Cele-UNSB01_5:7764570 | 5 | 7764570 | 7764720 | 151   | 10  | 15  | GGGTCTCACC  |
| GGGTCTCACCACGAT                                                                                                                                     |                       |   |         |         |       |     |     |             |
| UNSB01.fasta                                                                                                                                        | Cele-UNSB01_5:7956964 | 5 | 7956964 | 7957604 | 641   | 16  | 40  | TCTGGAACAT  |
| TCTGGAACATTCCAGAATTTTCTCGATTTTCTAAAAAGT                                                                                                             |                       |   |         |         |       |     |     |             |
| UNSB01.fasta                                                                                                                                        | Cele-UNSB01_5:7957689 | 5 | 7957689 | 7957969 | 281   | 8   | 35  | CAGAAAATTT  |
| CAGAAAATTTAAATTTCCCGCAAAAATATTTTTCA                                                                                                                 |                       |   |         |         |       |     |     |             |
| UNSB01.fasta                                                                                                                                        | Cele-UNSB01_5:7958037 | 5 | 7958037 | 7958202 | 166   | 11  | 15  | CCACGATGGG  |
| CCACGACGGGTCTCA                                                                                                                                     |                       |   |         |         |       |     |     |             |
| UNSB01.fasta                                                                                                                                        | Cele-UNSB01_5:7959905 | 5 | 7959905 | 7960085 | 181   | 11  | 15  | ACCCATCGTG  |
| ACCCATCGTGGTGAG                                                                                                                                     |                       |   |         |         |       |     |     |             |
| UNSB01.fasta                                                                                                                                        | Cele-UNSB01_5:8047889 | 5 | 8047889 | 8048164 | 276   | 11  | 25  | CCAGAGAGTA  |
| CCAGAGAGTAAATTATATTGTGAAG                                                                                                                           |                       |   |         |         |       |     |     |             |
| UNSB01.fasta                                                                                                                                        | Cele-UNSB01_5:8372367 | 5 | 8372367 | 8372880 | 514   | 17  | 15  | GGTGAGACCC  |
| GGTGAGACCCCTTCGT                                                                                                                                    |                       |   |         |         |       |     |     |             |
| UNSB01.fasta                                                                                                                                        | Cele-UNSB01_5:8373901 | 5 | 8373901 | 8376688 | 2788  | 161 | 17  | TCATTGACTA  |
| TCATTGACTACCTTTGC                                                                                                                                   |                       |   |         |         |       |     |     |             |
| UNSB01.fasta                                                                                                                                        | Cele-UNSB01_5:8388026 | 5 | 8388026 | 8392649 | 4624  | 67  | 69  | GTCTGGACTG  |
| GTCTGGACTGGTGTAGTAGAGCTGCTTGGAGGTTCTGTACTGGTGTCTCTGGAGCAGTGGTAGTAGTA                                                                                |                       |   |         |         |       |     |     |             |
| UNSB01.fasta                                                                                                                                        | Cele-UNSB01_5:8761530 | 5 | 8761530 | 8782970 | 21441 | 357 | 60  | ACACAATTGG  |
| ACACAATTGGAGTGGTGCTTGAGGAGCTGGATTGAGTCTCGTTATGTCGGTTGAAG                                                                                            |                       |   |         |         |       |     |     |             |
| UNSB01.fasta                                                                                                                                        | Cele-UNSB01_5:8785418 | 5 | 8785418 | 8789720 | 4303  | 37  | 114 | GTGTTTCAGA  |
| GTGTTTCAGAATTACATGGAGTCTCACTACTTGCAGAATTTGTGGCTGTAGACGATTGACCTGCTGTAGTTGAATCGCTTGAACTGTGCATAGTGGATGTTCCATCAGACGTTT                                  |                       |   |         |         |       |     |     |             |
| UNSB01.fasta                                                                                                                                        | Cele-UNSB01_5:8793961 | 5 | 8793961 | 8799031 | 5071  | 65  | 78  | TGCAAGGCTC  |
| TGCAAGGCTCCGATGATGATACCACTTCCAAGTCGAGGTGTTACAATTTTTGGATGTAATAGAACTTGAATCAGTGA                                                                       |                       |   |         |         |       |     |     |             |
| UNSB01.fasta                                                                                                                                        | Cele-UNSB01_5:8921030 | 5 | 8921030 | 8921237 | 208   | 8   | 26  | TTCGCCCTGA  |
| TTCGCCCTGAGCGATTTACCTCCCGT                                                                                                                          |                       |   |         |         |       |     |     |             |
| UNSB01.fasta                                                                                                                                        | Cele-UNSB01_5:9471886 | 5 | 9471886 | 9475930 | 4045  | 19  | 214 | GTAAGTCTC   |
| GTAAGTCTCAAAGCTTCTGGCACCTATTGGGATGTTGTTGGTAAATTTCTGAAAAAAGTTGGAATTTGCAACAAAGTTTCTGAAAGAATTTTCGAAAAAAGTTGATTGAAGTGATTGGGAATTTTCAAAGTTTCATAAATTTACCTA |                       |   |         |         |       |     |     |             |
| TTTTGCCTATAAATGGTCGTTTTCAATTTAATAATAAAATACGCACAAGGTACTGTAGGTTTTCT                                                                                   |                       |   |         |         |       |     |     |             |
| UNSB01.fasta                                                                                                                                        | Cele-UNSB01_5:9479420 | 5 | 9479420 | 9479630 | 211   | 6   | 35  | AGAAAAATTTA |
| AGAAAAATTTAAATTACCCGCCAAATATTTTCAC                                                                                                                  |                       |   |         |         |       |     |     |             |
| UNSB01.fasta                                                                                                                                        | Cele-UNSB01_5:9479685 | 5 | 9479685 | 947985  |       |     |     |             |

|                                                                                                                                                 |                        |   |          |          |       |     |     |             |
|-------------------------------------------------------------------------------------------------------------------------------------------------|------------------------|---|----------|----------|-------|-----|-----|-------------|
| UNSB01.fasta                                                                                                                                    | Cele-UNSB01_5:9644299  | 5 | 9644299  | 9645659  | 1361  | 40  | 40  | TTTCTAGAAA  |
| TTTCTAGAAAATTCGGGAAAACCTCGGAATATTCCAGAAC                                                                                                        |                        |   |          |          |       |     |     |             |
| UNSB01.fasta                                                                                                                                    | Cele-UNSB01_5:9975370  | 5 | 9975370  | 9975475  | 106   | 5   | 21  | TTCTAATTTCG |
| TTCTAATTCGACGAGCATCCC                                                                                                                           |                        |   |          |          |       |     |     |             |
| UNSB01.fasta                                                                                                                                    | Cele-UNSB01_5:9977175  | 5 | 9977175  | 9978242  | 1068  | 56  | 19  | TGTAACAATC  |
| TGTAACAATCTATTTTTCG                                                                                                                             |                        |   |          |          |       |     |     |             |
| UNSB01.fasta                                                                                                                                    | Cele-UNSB01_5:10311486 | 5 | 10311486 | 10312622 | 1137  | 33  | 34  | TTGGCGGGGAA |
| TTGGCGGGGAAATTCAAATTTTCAGTGAAAAAATT                                                                                                             |                        |   |          |          |       |     |     |             |
| UNSB01.fasta                                                                                                                                    | Cele-UNSB01_5:10490005 | 5 | 10490005 | 10492889 | 2885  | 111 | 26  | CCAGAGTCAC  |
| CCAGAGTCACTATAATTGGTGAACGG                                                                                                                      |                        |   |          |          |       |     |     |             |
| UNSB01.fasta                                                                                                                                    | Cele-UNSB01_5:10495318 | 5 | 10495318 | 10500018 | 4701  | 187 | 25  | TTTACTCTCT  |
| TTTACTCTCTGGCTTCACAGAATAA                                                                                                                       |                        |   |          |          |       |     |     |             |
| UNSB01.fasta                                                                                                                                    | Cele-UNSB01_5:10500053 | 5 | 10500053 | 10500266 | 214   | 19  | 11  | AGATACACTT  |
| AGATACACTTC                                                                                                                                     |                        |   |          |          |       |     |     |             |
| UNSB01.fasta                                                                                                                                    | Cele-UNSB01_5:10655040 | 5 | 10655040 | 10675549 | 20510 | 527 | 39  | CCACCAGAAA  |
| CCACCAGAAATACCAGTTTATGAAAAAGTGGCTCTAGGG                                                                                                         |                        |   |          |          |       |     |     |             |
| UNSB01.fasta                                                                                                                                    | Cele-UNSB01_5:11125880 | 5 | 11125880 | 11126094 | 215   | 10  | 11  | CACATTTTTTT |
| CACATTTTTTG                                                                                                                                     |                        |   |          |          |       |     |     |             |
| UNSB01.fasta                                                                                                                                    | Cele-UNSB01_5:11176286 | 5 | 11176286 | 11176509 | 224   | 5   | 45  | TCTGATCCTT  |
| TCTGATCCTTCAGATAAGAAGAATCGTAAGGGTACCTCCTGATGG                                                                                                   |                        |   |          |          |       |     |     |             |
| UNSB01.fasta                                                                                                                                    | Cele-UNSB01_5:11176622 | 5 | 11176622 | 11177248 | 627   | 14  | 45  | CTGAAGGATC  |
| CTGAAGGATCAGAACATCAGAAGGTACCCATGTGATCCTTCGGAG                                                                                                   |                        |   |          |          |       |     |     |             |
| UNSB01.fasta                                                                                                                                    | Cele-UNSB01_5:11342057 | 5 | 11342057 | 11345882 | 3826  | 85  | 45  | CCAAGCACAT  |
| CCAAGCACATCTACAGAGACACCTACAACCTGAATCAACTGCAGCA                                                                                                  |                        |   |          |          |       |     |     |             |
| UNSB01.fasta                                                                                                                                    | Cele-UNSB01_5:12149471 | 5 | 12149471 | 12149551 | 81    | 5   | 16  | AAAAATTATT  |
| AAAAATTATTGAATAC                                                                                                                                |                        |   |          |          |       |     |     |             |
| UNSB01.fasta                                                                                                                                    | Cele-UNSB01_5:12442637 | 5 | 12442637 | 12442985 | 349   | 5   | 18  | GCACTCCCTA  |
| GCACTCCCTATTAGTCTT                                                                                                                              |                        |   |          |          |       |     |     |             |
| UNSB01.fasta                                                                                                                                    | Cele-UNSB01_5:12601066 | 5 | 12601066 | 12601185 | 120   | 8   | 14  | CTATACGCTA  |
| CTATACGCTATACG                                                                                                                                  |                        |   |          |          |       |     |     |             |
| UNSB01.fasta                                                                                                                                    | Cele-UNSB01_5:12723614 | 5 | 12723614 | 12724001 | 388   | 10  | 39  | TGGTACGGTA  |
| TGGTACGGTAGTTGTAGTGGCAGTAGAGGTTGTTGTTGC                                                                                                         |                        |   |          |          |       |     |     |             |
| UNSB01.fasta                                                                                                                                    | Cele-UNSB01_5:13457267 | 5 | 13457267 | 13457761 | 495   | 26  | 19  | GTTACACGAA  |
| GTTACACGAAAAATAGATT                                                                                                                             |                        |   |          |          |       |     |     |             |
| UNSB01.fasta                                                                                                                                    | Cele-UNSB01_5:13461673 | 5 | 13461673 | 13462167 | 495   | 26  | 19  | GTTACACGAA  |
| GTTACACGAAAAATAGATT                                                                                                                             |                        |   |          |          |       |     |     |             |
| UNSB01.fasta                                                                                                                                    | Cele-UNSB01_5:13535913 | 5 | 13535913 | 13536380 | 468   | 12  | 40  | TCTGGAATGT  |
| TCTGGAATGTTCCAGAACTTCTAGAAAAATCGAGAAAAAT                                                                                                        |                        |   |          |          |       |     |     |             |
| UNSB01.fasta                                                                                                                                    | Cele-UNSB01_5:13735981 | 5 | 13735981 | 13739186 | 3206  | 193 | 16  | GAAAAATTTT  |
| GAAAAATTTTGCTGCT                                                                                                                                |                        |   |          |          |       |     |     |             |
| UNSB01.fasta                                                                                                                                    | Cele-UNSB01_5:13735981 | 5 | 13735981 | 13740432 | 4452  | 256 | 16  | GAAAAATTTT  |
| GAAAAATTTTGCTGCT                                                                                                                                |                        |   |          |          |       |     |     |             |
| UNSB01.fasta                                                                                                                                    | Cele-UNSB01_5:13735981 | 5 | 13735981 | 13741243 | 5263  | 280 | 16  | GAAAAATTTT  |
| GAAAAATTTTGCTGCT                                                                                                                                |                        |   |          |          |       |     |     |             |
| UNSB01.fasta                                                                                                                                    | Cele-UNSB01_5:13735981 | 5 | 13735981 | 13743674 | 7694  | 334 | 16  | GAAAAATTTT  |
| GAAAAATTTTGCTGCT                                                                                                                                |                        |   |          |          |       |     |     |             |
| UNSB01.fasta                                                                                                                                    | Cele-UNSB01_5:13979410 | 5 | 13979410 | 13979500 | 91    | 6   | 15  | TCGTGGTGAG  |
| TCGTGGTGAGACCCCT                                                                                                                                |                        |   |          |          |       |     |     |             |
| UNSB01.fasta                                                                                                                                    | Cele-UNSB01_5:13979523 | 5 | 13979523 | 13981831 | 2309  | 66  | 35  | GCGGGAAATT  |
| GCGGGAAATTCAAATTTTCAGTGAAAAAATTTTG                                                                                                              |                        |   |          |          |       |     |     |             |
| UNSB01.fasta                                                                                                                                    | Cele-UNSB01_5:13979521 | 5 | 13979521 | 13982440 | 2920  | 68  | 35  | TGGCGGGGAAA |
| TGGCGGGGAAATTCAAATTTTCAGTGAAAAAATTTT                                                                                                            |                        |   |          |          |       |     |     |             |
| UNSB01.fasta                                                                                                                                    | Cele-UNSB01_5:14055771 | 5 | 14055771 | 14055849 | 79    | 6   | 12  | TCTTTCTCCT  |
| TCTTTCTCCTTT                                                                                                                                    |                        |   |          |          |       |     |     |             |
| UNSB01.fasta                                                                                                                                    | Cele-UNSB01_5:14155473 | 5 | 14155473 | 14156076 | 604   | 4   | 151 | CATTTCAGAT  |
| CATTTCAGATATTCATCACCACCAACACCTTCATCCACTTCTTCGCCTGGAACGACGGGATTTTCTACAAAATCGGATTTTCTCTATGTCAGTTTAATTGATGTATAATCCGAAAAGTCAGTCTTTCTAGGTTTTTAAATTGA |                        |   |          |          |       |     |     |             |
| AA                                                                                                                                              |                        |   |          |          |       |     |     |             |
| UNSB01.fasta                                                                                                                                    | Cele-UNSB01_5:14159253 | 5 | 14159253 | 14159397 | 145   | 6   | 11  | CTACAGTACC  |
| CTACAGTACTG                                                                                                                                     |                        |   |          |          |       |     |     |             |

|                                                                         |                        |   |          |          |      |     |    |             |
|-------------------------------------------------------------------------|------------------------|---|----------|----------|------|-----|----|-------------|
| UNSB01.fasta                                                            | Cele-UNSB01_5:14206302 | 5 | 14206302 | 14207970 | 1669 | 22  | 57 | GAACTCAACA  |
| GAACTCAACAAGCTGATCAAGAGCAACACCGTGGATCCCGATCTGCCGGACAGAAGG               |                        |   |          |          |      |     |    |             |
| UNSB01.fasta                                                            | Cele-UNSB01_5:14209723 | 5 | 14209723 | 14211643 | 1921 | 32  | 60 | CTGCTGATTTC |
| CTGCTGATTCCGAGAAGAAGGCCCAACCAAGAGAGAATCTGATAAGCCAAAGACTGAAT             |                        |   |          |          |      |     |    |             |
| UNSB01.fasta                                                            | Cele-UNSB01_5:14226001 | 5 | 14226001 | 14226091 | 91   | 6   | 15 | CGTGGTGAGA  |
| CGTGTTGAGACCCTA                                                         |                        |   |          |          |      |     |    |             |
| UNSB01.fasta                                                            | Cele-UNSB01_5:14226151 | 5 | 14226151 | 14226968 | 818  | 21  | 35 | GGAAATTCAA  |
| GGAAATTCAAATTTTCAGTAAAAAAATTTTGGCG                                      |                        |   |          |          |      |     |    |             |
| UNSB01.fasta                                                            | Cele-UNSB01_5:14260478 | 5 | 14260478 | 14260568 | 91   | 6   | 15 | GGGTCTCACC  |
| GGGTCTCACCACGAT                                                         |                        |   |          |          |      |     |    |             |
| UNSB01.fasta                                                            | Cele-UNSB01_5:14309212 | 5 | 14309212 | 14310008 | 797  | 14  | 64 | GTAGTCAAAA  |
| GTAGTCAAAAAGACAAAAGTGCGAATGTAGCTATTTTTCAGTCAGTAGCGAAAAAGACATTCA         |                        |   |          |          |      |     |    |             |
| UNSB01.fasta                                                            | Cele-UNSB01_5:14425209 | 5 | 14425209 | 14425464 | 256  | 5   | 24 | GCCGCTCCAG  |
| GCCGCTCCAGCACCAGCACCAGAA                                                |                        |   |          |          |      |     |    |             |
| UNSB01.fasta                                                            | Cele-UNSB01_5:14452450 | 5 | 14452450 | 14453298 | 849  | 19  | 45 | TCTGATCCTT  |
| TCTGATCCTTCAGATAAGAAGGATCGTAAGGGTACCTCCTGATGG                           |                        |   |          |          |      |     |    |             |
| UNSB01.fasta                                                            | Cele-UNSB01_5:14454544 | 5 | 14454544 | 14454902 | 359  | 8   | 45 | AAGGATCAGA  |
| AAGGATCAGAACATCAGAAGGTACCCATGTGATCCTTCGGAGCTG                           |                        |   |          |          |      |     |    |             |
| UNSB01.fasta                                                            | Cele-UNSB01_5:14550286 | 5 | 14550286 | 14550378 | 93   | 6   | 15 | TCCCCTTTTC  |
| TCCCCTTTTCGTATC                                                         |                        |   |          |          |      |     |    |             |
| UNSB01.fasta                                                            | Cele-UNSB01_5:14856483 | 5 | 14856483 | 14857645 | 1163 | 45  | 25 | TGTGAAGCCA  |
| TGTGAAGCCAGAGAGTAAATAATAC                                               |                        |   |          |          |      |     |    |             |
| UNSB01.fasta                                                            | Cele-UNSB01_5:14878525 | 5 | 14878525 | 14883699 | 5175 | 182 | 27 | GGAAGCCACA  |
| GGAAGCCACAGAGAGTAGAATATGGTG                                             |                        |   |          |          |      |     |    |             |
| UNSB01.fasta                                                            | Cele-UNSB01_5:15130293 | 5 | 15130293 | 15130341 | 49   | 4   | 12 | TCTAAGTCTA  |
| TCTAAGTCTAAA                                                            |                        |   |          |          |      |     |    |             |
| UNSB01.fasta                                                            | Cele-UNSB01_5:15289065 | 5 | 15289065 | 15289259 | 195  | 6   | 35 | GGAATTGAAA  |
| GGAATTGAAAATTTCCGACAAATCGGCAAATTGGC                                     |                        |   |          |          |      |     |    |             |
| UNSB01.fasta                                                            | Cele-UNSB01_5:15290454 | 5 | 15290454 | 15290610 | 157  | 6   | 26 | TTCACCTAAA  |
| TTCACTTAAATAATGACTCTAACAA                                               |                        |   |          |          |      |     |    |             |
| UNSB01.fasta                                                            | Cele-UNSB01_5:15415879 | 5 | 15415879 | 15416665 | 787  | 8   | 15 | TCTCACCACG  |
| TCTCACCACGAAGGG                                                         |                        |   |          |          |      |     |    |             |
| UNSB01.fasta                                                            | Cele-UNSB01_5:15441112 | 5 | 15441112 | 15445831 | 4720 | 118 | 40 | ATTTTCTAG   |
| ATTTTCTAGAAAATTTCTGGAACACTCCAGAATTTTCCCG                                |                        |   |          |          |      |     |    |             |
| UNSB01.fasta                                                            | Cele-UNSB01_5:15445975 | 5 | 15445975 | 15447055 | 1081 | 72  | 15 | CCACGATGGG  |
| CCACGATGGGTCTCA                                                         |                        |   |          |          |      |     |    |             |
| UNSB01.fasta                                                            | Cele-UNSB01_5:15447313 | 5 | 15447313 | 15447447 | 135  | 5   | 11 | GTACTCCTAC  |
| GTACTCCTACA                                                             |                        |   |          |          |      |     |    |             |
| UNSB01.fasta                                                            | Cele-UNSB01_5:15668468 | 5 | 15668468 | 15668848 | 381  | 5   | 73 | TTAGGCTTAA  |
| TTAGGCTTAAGTGTGCATAAGGATTTCCAATATTTTCTTCAGTTGGGCATCCTAGTATGTTTTTCGGGCCT |                        |   |          |          |      |     |    |             |
| UNSB01.fasta                                                            | Cele-UNSB01_5:15725489 | 5 | 15725489 | 15725564 | 76   | 5   | 15 | AGACCCATCG  |
| AGACCCATCGTAGTG                                                         |                        |   |          |          |      |     |    |             |
| UNSB01.fasta                                                            | Cele-UNSB01_5:15725600 | 5 | 15725600 | 15726976 | 1377 | 36  | 35 | TTCAAATTTT  |
| TTCAAATTTTCTGTGAGAAAAATTTGGGGGGAAA                                      |                        |   |          |          |      |     |    |             |
| UNSB01.fasta                                                            | Cele-UNSB01_5:15757927 | 5 | 15757927 | 15757998 | 72   | 5   | 12 | CTTAGGCTTA  |
| CTTAGACTTAGG                                                            |                        |   |          |          |      |     |    |             |
| UNSB01.fasta                                                            | Cele-UNSB01_5:15913508 | 5 | 15913508 | 15913600 | 93   | 6   | 15 | CGAAAAGGGG  |
| CGAAAAGGGGATCTG                                                         |                        |   |          |          |      |     |    |             |
| UNSB01.fasta                                                            | Cele-UNSB01_5:15966117 | 5 | 15966117 | 15966182 | 66   | 4   | 11 | GTACTGTAGG  |
| GTACTGTAGGG                                                             |                        |   |          |          |      |     |    |             |
| UNSB01.fasta                                                            | Cele-UNSB01_5:16082522 | 5 | 16082522 | 16083430 | 909  | 7   | 37 | GCGGGAATTC  |
| GCGGGAATTCAAATTTTAATTATTTGAAATCATTTTG                                   |                        |   |          |          |      |     |    |             |
| UNSB01.fasta                                                            | Cele-UNSB01_5:16332671 | 5 | 16332671 | 16332882 | 212  | 6   | 42 | TTTCGGCAAC  |
| TTTCGGCAACCGCAATTGCCGATGTTGCCGAACCCGAAAAA                               |                        |   |          |          |      |     |    |             |
| UNSB01.fasta                                                            | Cele-UNSB01_5:16414638 | 5 | 16414638 | 16414819 | 182  | 5   | 36 | GGGAATTCAA  |
| GGGAATTCAAATTTCAATTTTGGAAACATTTTGGC                                     |                        |   |          |          |      |     |    |             |
| UNSB01.fasta                                                            | Cele-UNSB01_5:16414904 | 5 | 16414904 | 16415369 | 466  | 31  | 15 | TGGTGAGACC  |
| TGGTGAGACCTTTTCG                                                        |                        |   |          |          |      |     |    |             |



|                                                                                                                                                                      |                        |   |          |          |       |     |     |            |
|----------------------------------------------------------------------------------------------------------------------------------------------------------------------|------------------------|---|----------|----------|-------|-----|-----|------------|
| UNSB01.fasta                                                                                                                                                         | Cele-UNSB01_5:16471613 | 5 | 16471613 | 16475389 | 3777  | 23  | 164 | CGTACAAGCT |
| CGTACAAGCTATTATACTTTTGATTGGCATATTCCTGGTGTTTTTGACTATGCTGAACATTTTTATGAAATAAAAAAGAATGACTCCATATGATTTTCTAGGACTTTTGAATTTTGAAGAAAAATCAGATTTTATATATTTTATCAATTTTAAAAAAATACTTC |                        |   |          |          |       |     |     |            |
| UNSB01.fasta                                                                                                                                                         | Cele-UNSB01_5:16591935 | 5 | 16591935 | 16597985 | 6051  | 50  | 121 | GTTGCAAACC |
| GTTGCAAACCGCAAGAGCAAACCTTGCCAAATGACAAGCCACCAAGTACTCGTTGCCCTTACCTATCATATAATCGTAGACTATAATTTCTCTAAAAAGATAGTTGCCCTTAATAGCAAAAG                                           |                        |   |          |          |       |     |     |            |
| UNSB01.fasta                                                                                                                                                         | Cele-UNSB01_5:16677048 | 5 | 16677048 | 16677311 | 264   | 16  | 12  | CATTGACTTG |
| CATTGACTTGAG                                                                                                                                                         |                        |   |          |          |       |     |     |            |
| UNSB01.fasta                                                                                                                                                         | Cele-UNSB01_5:16682435 | 5 | 16682435 | 16683237 | 803   | 14  | 22  | GGGTACTGTA |
| GGGTACTGTAGGAATACTGTGG                                                                                                                                               |                        |   |          |          |       |     |     |            |
| UNSB01.fasta                                                                                                                                                         | Cele-UNSB01_5:16693408 | 5 | 16693408 | 16693990 | 583   | 10  | 11  | GTACTGTAGG |
| GTACTGTAGGG                                                                                                                                                          |                        |   |          |          |       |     |     |            |
| UNSB01.fasta                                                                                                                                                         | Cele-UNSB01_5:16694107 | 5 | 16694107 | 16694865 | 759   | 17  | 40  | CTGGAATGTT |
| CTGGAATGTTCCAAAACCTTCTGGAAAATTTGAGAAAATG                                                                                                                             |                        |   |          |          |       |     |     |            |
| UNSB01.fasta                                                                                                                                                         | Cele-UNSB01_5:16694107 | 5 | 16694107 | 16695183 | 1077  | 18  | 40  | CTGGAATGTT |
| CTGGAATGTTCCAAAACCTTCTGGAAAATTTGAGAAAATG                                                                                                                             |                        |   |          |          |       |     |     |            |
| UNSB01.fasta                                                                                                                                                         | Cele-UNSB01_5:16699381 | 5 | 16699381 | 16699441 | 61    | 4   | 15  | CGAAAAGGGG |
| CAAAAAGGGGATCTG                                                                                                                                                      |                        |   |          |          |       |     |     |            |
| UNSB01.fasta                                                                                                                                                         | Cele-UNSB01_5:16699651 | 5 | 16699651 | 16699786 | 136   | 7   | 15  | GCAGATCCCC |
| GCAGATCCCCTTTT                                                                                                                                                       |                        |   |          |          |       |     |     |            |
| UNSB01.fasta                                                                                                                                                         | Cele-UNSB01_5:16730521 | 5 | 16730521 | 16730649 | 129   | 4   | 32  | GCTGATTGGT |
| GCTGATTGGTAAGATAAAACTGGTGGTGAAAC                                                                                                                                     |                        |   |          |          |       |     |     |            |
| UNSB01.fasta                                                                                                                                                         | Cele-UNSB01_5:16772051 | 5 | 16772051 | 16772198 | 148   | 7   | 21  | ATTTTTCAAT |
| ATTTTTCAATTTTCGTCTAAC                                                                                                                                                |                        |   |          |          |       |     |     |            |
| UNSB01.fasta                                                                                                                                                         | Cele-UNSB01_5:16819160 | 5 | 16819160 | 16819347 | 188   | 11  | 17  | TAACCTGACT |
| TAACCTGACTGCTATAT                                                                                                                                                    |                        |   |          |          |       |     |     |            |
| UNSB01.fasta                                                                                                                                                         | Cele-UNSB01_5:16845717 | 5 | 16845717 | 16846129 | 413   | 25  | 16  | ACATACCTAC |
| ACATACCTACATACCT                                                                                                                                                     |                        |   |          |          |       |     |     |            |
| UNSB01.fasta                                                                                                                                                         | Cele-UNSB01_5:17041242 | 5 | 17041242 | 17041488 | 247   | 7   | 11  | CTACAGTACC |
| CTACAGTACCT                                                                                                                                                          |                        |   |          |          |       |     |     |            |
| UNSB01.fasta                                                                                                                                                         | Cele-UNSB01_5:17104481 | 5 | 17104481 | 17104658 | 178   | 5   | 21  | CTAATTAGCG |
| CTAAGTAGCGTCGCTTCCTTT                                                                                                                                                |                        |   |          |          |       |     |     |            |
| UNSB01.fasta                                                                                                                                                         | Cele-UNSB01_5:17108364 | 5 | 17108364 | 17108469 | 106   | 5   | 21  | TGCTAATTAG |
| TGCTAATTAGCGCGGCTGCGT                                                                                                                                                |                        |   |          |          |       |     |     |            |
| UNSB01.fasta                                                                                                                                                         | Cele-UNSB01_5:17207041 | 5 | 17207041 | 17207511 | 471   | 12  | 40  | AAAATTCTGG |
| AATATTCTGGGATGTCTAGAACCTTCTGGAAAATTGAG                                                                                                                               |                        |   |          |          |       |     |     |            |
| UNSB01.fasta                                                                                                                                                         | Cele-UNSB01_5:17249920 | 5 | 17249920 | 17250872 | 953   | 8   | 119 | AACTGTGGGC |
| AACTGTGGGCTGGCTTTAATCCTAACCCAGCAGAGCAGGATGTAGGCCTGAAACGTGGTTGTTATTCAATCAAGCCTAACAACCAGGTTTGAGGGCCGCAGGCCCGAAAACCTCTTGGA                                              |                        |   |          |          |       |     |     |            |
| UNSB01.fasta                                                                                                                                                         | Cele-UNSB01_5:17487338 | 5 | 17487338 | 17487635 | 298   | 8   | 37  | AAAACATTTT |
| AAAACATTTTGGCGGGAATTCAAAATTTAATTTTGG                                                                                                                                 |                        |   |          |          |       |     |     |            |
| UNSB01.fasta                                                                                                                                                         | Cele-UNSB01_5:17569173 | 5 | 17569173 | 17569281 | 109   | 9   | 12  | CGCAACGCGA |
| CGCAACGCGATA                                                                                                                                                         |                        |   |          |          |       |     |     |            |
| UNSB01.fasta                                                                                                                                                         | Cele-UNSB01_5:17588702 | 5 | 17588702 | 17608641 | 19940 | 337 | 59  | TTATGGTGAA |
| TTATGGTGAAATGGAATTCAAATGTGCACTGGTTTTCAAAATTTTAAAAACCGAGAA                                                                                                            |                        |   |          |          |       |     |     |            |
| UNSB01.fasta                                                                                                                                                         | Cele-UNSB01_5:17626210 | 5 | 17626210 | 17626494 | 285   | 15  | 19  | TTTTCGTGTA |
| TTTTCGTGTAACCATCTAT                                                                                                                                                  |                        |   |          |          |       |     |     |            |
| UNSB01.fasta                                                                                                                                                         | Cele-UNSB01_5:17709602 | 5 | 17709602 | 17709736 | 135   | 5   | 11  | CCTACAGTAC |
| CCTACAGTACC                                                                                                                                                          |                        |   |          |          |       |     |     |            |
| UNSB01.fasta                                                                                                                                                         | Cele-UNSB01_5:17737089 | 5 | 17737089 | 17738916 | 1828  | 7   | 255 | AACAAGTCGG |
| AACAAGTCGGGAACGTTTCGGAAAGCTCTGAGGAAAACCTCCGACAGTATTATGCTTAAAGTACGCAATTGAGCTATCTTTATTAGATTGCAAGAGGACGCTTCAAAAATTGAAGCAATAACGAAGAAGCTTAAAGTTGGAAGTGGCGAAGC             |                        |   |          |          |       |     |     |            |
| TTAAATTGAGAAATTACGCAGTCTTTATCAGATTCAAAAGACGACTCTTTGTCCAATGAAGCAAATCTGCAGAACGATCTACCTTCGACTTCGATAGCAAACTCC                                                            |                        |   |          |          |       |     |     |            |
| UNSB01.fasta                                                                                                                                                         | Cele-UNSB01_5:17801402 | 5 | 17801402 | 17801541 | 140   | 10  | 12  | ACGCGACACG |
| ACGCGGCACGCA                                                                                                                                                         |                        |   |          |          |       |     |     |            |
| UNSB01.fasta                                                                                                                                                         | Cele-UNSB01_5:17834079 | 5 | 17834079 | 17834336 | 258   | 8   | 11  | CCTACAGTAC |
| CCTACAGTACC                                                                                                                                                          |                        |   |          |          |       |     |     |            |
| UNSB01.fasta                                                                                                                                                         | Cele-UNSB01_5:17844176 | 5 | 17844176 | 17844688 | 513   | 32  | 16  | CCAGGGTTCC |
| CCAGGGTTCCAGGGTT                                                                                                                                                     |                        |   |          |          |       |     |     |            |
| UNSB01.fasta                                                                                                                                                         | Cele-UNSB01_5:17844176 | 5 | 17844176 | 17845043 | 868   | 35  | 16  | CCAGGGTTCC |
| CCAGGGTTCCAGGGTT                                                                                                                                                     |                        |   |          |          |       |     |     |            |

|                                                                                                                                               |                        |   |          |          |       |     |     |             |
|-----------------------------------------------------------------------------------------------------------------------------------------------|------------------------|---|----------|----------|-------|-----|-----|-------------|
| UNSB01.fasta                                                                                                                                  | Cele-UNSB01_5:17868232 | 5 | 17868232 | 17868328 | 97    | 6   | 16  | GAATAATATT  |
| GAATAATATTGGAGAT                                                                                                                              |                        |   |          |          |       |     |     |             |
| UNSB01.fasta                                                                                                                                  | Cele-UNSB01_5:17962175 | 5 | 17962175 | 17963525 | 1351  | 6   | 143 | CAGTGGGATT  |
| CAGTGGGATTCTGAATTTATTTCCAATCAAACGTCGGGGTTTCGAGTCCGCACAGGGGTATTTATTTTTTGCAGCTGTGATTACAAGTTTATAGCTGCAAAAAGTGATTTTATCGAATTTTAGAAAAATGTCCGAATGGCA |                        |   |          |          |       |     |     |             |
| UNSB01.fasta                                                                                                                                  | Cele-UNSB01_5:17995705 | 5 | 17995705 | 17996016 | 312   | 5   | 20  | ATTTGACCTA  |
| ATTTGACCTACTTTTTTAAAA                                                                                                                         |                        |   |          |          |       |     |     |             |
| UNSB01.fasta                                                                                                                                  | Cele-UNSB01_5:18032604 | 5 | 18032604 | 18033134 | 531   | 13  | 34  | TCAAATTTTC  |
| TCAGATTTTCTGAAAAAAAAAATTTATTCGGGAAAT                                                                                                          |                        |   |          |          |       |     |     |             |
| UNSB01.fasta                                                                                                                                  | Cele-UNSB01_5:18100660 | 5 | 18100660 | 18102309 | 1650  | 32  | 44  | TTGCCGGAAA  |
| TTGCCGGAAATAGTAATTTTGGCAAATTGCCGGTTTGCTGAAT                                                                                                   |                        |   |          |          |       |     |     |             |
| UNSB01.fasta                                                                                                                                  | Cele-UNSB01_5:18206252 | 5 | 18206252 | 18206609 | 358   | 5   | 35  | AATTCGGGCA  |
| ACTTCCGGCAAGTTGCCGATTTGCCGGAAATCTTC                                                                                                           |                        |   |          |          |       |     |     |             |
| UNSB01.fasta                                                                                                                                  | Cele-UNSB01_5:18261348 | 5 | 18261348 | 18261785 | 438   | 10  | 35  | TTTCCGGCAA  |
| TTTCCGGCAAATCGGCGATTTGCCTGAATTGAAAG                                                                                                           |                        |   |          |          |       |     |     |             |
| UNSB01.fasta                                                                                                                                  | Cele-UNSB01_5:18345564 | 5 | 18345564 | 18345809 | 246   | 7   | 35  | AAATTTTCGG  |
| AAATTTTCGGCAAATTCGATAATTGCCGGTTTTGT                                                                                                           |                        |   |          |          |       |     |     |             |
| UNSB01.fasta                                                                                                                                  | Cele-UNSB01_5:18406789 | 5 | 18406789 | 18410349 | 3561  | 114 | 31  | GTCAATTTTTT |
| GTCAATTTTTGGCGGGAAATTCAAATTTTCA                                                                                                               |                        |   |          |          |       |     |     |             |
| UNSB01.fasta                                                                                                                                  | Cele-UNSB01_5:18412081 | 5 | 18412081 | 18412792 | 712   | 10  | 78  | GAGCTTTGGG  |
| GAGCTTTGGGGCTTTTGGCTTGATCTCAGTCGACTTGATGGATTCTGGTTTGGGTTCTGCAGGCTTTTCGGGCTCCTT                                                                |                        |   |          |          |       |     |     |             |
| UNSB01.fasta                                                                                                                                  | Cele-UNSB01_5:18413578 | 5 | 18413578 | 18417093 | 3516  | 121 | 19  | TTGACGCAAT  |
| TTGACGCAATTCTCGTGCC                                                                                                                           |                        |   |          |          |       |     |     |             |
| UNSB01.fasta                                                                                                                                  | Cele-UNSB01_5:18442188 | 5 | 18442188 | 18442272 | 85    | 4   | 21  | GCACTGACCA  |
| GCACTGACCAAATGCAATGTT                                                                                                                         |                        |   |          |          |       |     |     |             |
| UNSB01.fasta                                                                                                                                  | Cele-UNSB01_5:18556604 | 5 | 18556604 | 18557205 | 602   | 6   | 45  | GGGGGACCCT  |
| GGGGGACCCTTATGATCCTTTGGAGCTGAAGATTCAAGTCATAAG                                                                                                 |                        |   |          |          |       |     |     |             |
| UNSB01.fasta                                                                                                                                  | Cele-UNSB01_5:18596071 | 5 | 18596071 | 18596370 | 300   | 14  | 14  | ACAAACTACA  |
| ACAAACTACAAACT                                                                                                                                |                        |   |          |          |       |     |     |             |
| UNSB01.fasta                                                                                                                                  | Cele-UNSB01_5:18630095 | 5 | 18630095 | 18630532 | 438   | 22  | 19  | CAAGGCACTA  |
| CAAGGCACGAGAATTGCGC                                                                                                                           |                        |   |          |          |       |     |     |             |
| UNSB01.fasta                                                                                                                                  | Cele-UNSB01_5:18631640 | 5 | 18631640 | 18632148 | 509   | 18  | 19  | TGACGCAATT  |
| TGACGCAATTCTAGTTCAT                                                                                                                           |                        |   |          |          |       |     |     |             |
| UNSB01.fasta                                                                                                                                  | Cele-UNSB01_5:18642200 | 5 | 18642200 | 18655941 | 13742 | 679 | 20  | ACACGAAAAA  |
| ACACGAAAAAATAGATTGTT                                                                                                                          |                        |   |          |          |       |     |     |             |
| UNSB01.fasta                                                                                                                                  | Cele-UNSB01_5:18664756 | 5 | 18664756 | 18664882 | 127   | 9   | 14  | GTCTGGGGTC  |
| GTCTGGGGTCTGGG                                                                                                                                |                        |   |          |          |       |     |     |             |
| UNSB01.fasta                                                                                                                                  | Cele-UNSB01_5:18669912 | 5 | 18669912 | 18670449 | 538   | 16  | 31  | TTGCCCCAGA  |
| TTGACCCAGAGCTTCTTGACCCAAGCCCCC                                                                                                                |                        |   |          |          |       |     |     |             |
| UNSB01.fasta                                                                                                                                  | Cele-UNSB01_5:18701783 | 5 | 18701783 | 18702035 | 253   | 9   | 28  | CCAAGAGAAT  |
| CCAAGAGAATTTCAACCACCTGGAAATT                                                                                                                  |                        |   |          |          |       |     |     |             |
| UNSB01.fasta                                                                                                                                  | Cele-UNSB01_5:18728400 | 5 | 18728400 | 18728559 | 160   | 4   | 32  | GAATTCAAAT  |
| GAATTCAAATTTCTGAAAAATTTTGGCGT                                                                                                                 |                        |   |          |          |       |     |     |             |
| UNSB01.fasta                                                                                                                                  | Cele-UNSB01_5:18730021 | 5 | 18730021 | 18731423 | 1403  | 114 | 12  | GTATATGTAT  |
| GTATATGTATAT                                                                                                                                  |                        |   |          |          |       |     |     |             |
| UNSB01.fasta                                                                                                                                  | Cele-UNSB01_5:18793643 | 5 | 18793643 | 18794338 | 696   | 5   | 31  | AAAATTTTGA  |
| AAAATTTTGACCCAGAAATCGAAAAATTCGC                                                                                                               |                        |   |          |          |       |     |     |             |
| UNSB01.fasta                                                                                                                                  | Cele-UNSB01_5:18824768 | 5 | 18824768 | 18825020 | 253   | 16  | 12  | AGGCTTAGGC  |
| AGGCCTAGGCTT                                                                                                                                  |                        |   |          |          |       |     |     |             |
| UNSB01.fasta                                                                                                                                  | Cele-UNSB01_5:18831834 | 5 | 18831834 | 18832119 | 286   | 11  | 19  | TTGACGCAAT  |
| TTGACACAATTTTAGTACC                                                                                                                           |                        |   |          |          |       |     |     |             |
| UNSB01.fasta                                                                                                                                  | Cele-UNSB01_5:18833669 | 5 | 18833669 | 18833973 | 305   | 15  | 19  | TAGTGCCTTG  |
| TAGTGCCTTGATGCAATTT                                                                                                                           |                        |   |          |          |       |     |     |             |
| UNSB01.fasta                                                                                                                                  | Cele-UNSB01_5:18836263 | 5 | 18836263 | 18836629 | 367   | 11  | 33  | TGTCGGCTGC  |
| TGTCGGCTGCTAAAACTATAGCCTCCCGTAGG                                                                                                              |                        |   |          |          |       |     |     |             |
| UNSB01.fasta                                                                                                                                  | Cele-UNSB01_5:18839756 | 5 | 18839756 | 18840116 | 361   | 22  | 12  | AGCCTAAGCC  |
| AGCCTAAGCCTA                                                                                                                                  |                        |   |          |          |       |     |     |             |
| UNSB01.fasta                                                                                                                                  | Cele-UNSB01_5:18842565 | 5 | 18842565 | 18843912 | 1348  | 50  | 20  | GTAAATCTAC  |
| GTAAATTTACATTGGCCTCC                                                                                                                          |                        |   |          |          |       |     |     |             |

|                                         |                        |   |          |          |      |     |    |             |
|-----------------------------------------|------------------------|---|----------|----------|------|-----|----|-------------|
| UNSB01.fasta                            | Cele-UNSB01_5:18846370 | 5 | 18846370 | 18846628 | 259  | 18  | 12 | TAAGCCTAAG  |
| TAAACCTAAGCG                            |                        |   |          |          |      |     |    |             |
| UNSB01.fasta                            | Cele-UNSB01_5:18856264 | 5 | 18856264 | 18856396 | 133  | 9   | 12 | AGCCTAAGCC  |
| AGCCTAAGCCTA                            |                        |   |          |          |      |     |    |             |
| UNSB01.fasta                            | Cele-UNSB01_5:18874657 | 5 | 18874657 | 18874753 | 97   | 6   | 12 | CTAAGCCTAA  |
| CTAATCCTAAGC                            |                        |   |          |          |      |     |    |             |
| UNSB01.fasta                            | Cele-UNSB01_5:18877478 | 5 | 18877478 | 18878086 | 609  | 29  | 19 | GTGCTTTGAC  |
| GTGCTTTGACGCAATTCTA                     |                        |   |          |          |      |     |    |             |
| UNSB01.fasta                            | Cele-UNSB01_5:18890478 | 5 | 18890478 | 18890638 | 161  | 8   | 20 | GATTTTTTCTG |
| GATTTTTTTGAAAAATTATT                    |                        |   |          |          |      |     |    |             |
| UNSB01.fasta                            | Cele-UNSB01_5:18891023 | 5 | 18891023 | 18891077 | 55   | 4   | 12 | TAAGCCTAAG  |
| TAAGCCTAGGCC                            |                        |   |          |          |      |     |    |             |
| UNSB01.fasta                            | Cele-UNSB01_5:18895119 | 5 | 18895119 | 18895676 | 558  | 15  | 39 | GTAATTTATA  |
| GTAATTTATAATTTTTTAAATATGAGTTATGTATTGCCC |                        |   |          |          |      |     |    |             |
| UNSB01.fasta                            | Cele-UNSB01_5:18898055 | 5 | 18898055 | 18898199 | 145  | 9   | 12 | GCTTAGGCTT  |
| GCTTCGGCTTAG                            |                        |   |          |          |      |     |    |             |
| UNSB01.fasta                            | Cele-UNSB01_5:18899719 | 5 | 18899719 | 18900018 | 300  | 5   | 11 | TTTCAGGCCT  |
| TTTAGGCCTAC                             |                        |   |          |          |      |     |    |             |
| UNSB01.fasta                            | Cele-UNSB01_5:18902702 | 5 | 18902702 | 18903276 | 575  | 24  | 21 | AAAAATCGAT  |
| AAAAATCGATAAAATATGGAG                   |                        |   |          |          |      |     |    |             |
| UNSB01.fasta                            | Cele-UNSB01_5:18924789 | 5 | 18924789 | 18925018 | 230  | 6   | 35 | GGAAATTCAA  |
| GAAAAATTCAAATTTTCTGAGAAAAATTTTTTTGGC    |                        |   |          |          |      |     |    |             |
| UNSB01.fasta                            | Cele-UNSB01_5:18933758 | 5 | 18933758 | 18934184 | 427  | 12  | 20 | AGAAAAATCA  |
| AGAAAAATCAATAAATTTTT                    |                        |   |          |          |      |     |    |             |
| UNSB01.fasta                            | Cele-UNSB01_5:18934684 | 5 | 18934684 | 18935273 | 590  | 23  | 19 | TGACGCAATT  |
| TGACGCATTTTATAGTGCCT                    |                        |   |          |          |      |     |    |             |
| UNSB01.fasta                            | Cele-UNSB01_5:18935616 | 5 | 18935616 | 18936186 | 571  | 26  | 19 | ACTAGAATTG  |
| ACTAGAAGTGCGCCAATAC                     |                        |   |          |          |      |     |    |             |
| UNSB01.fasta                            | Cele-UNSB01_5:18937116 | 5 | 18937116 | 18937194 | 79   | 6   | 12 | GGCTCAGGCT  |
| GGCTCCGGCTCA                            |                        |   |          |          |      |     |    |             |
| UNSB01.fasta                            | Cele-UNSB01_5:18944459 | 5 | 18944459 | 18944687 | 229  | 8   | 19 | TTCTAGTGCC  |
| TTCTAGTGCTTGCGCTT                       |                        |   |          |          |      |     |    |             |
| UNSB01.fasta                            | Cele-UNSB01_5:18982935 | 5 | 18982935 | 18983047 | 113  | 7   | 12 | AGCCTGAGCC  |
| AGCCTGAGCCTG                            |                        |   |          |          |      |     |    |             |
| UNSB01.fasta                            | Cele-UNSB01_5:19004973 | 5 | 19004973 | 19005085 | 113  | 7   | 12 | AGCCTGAGCC  |
| AGCCTGAGCCTG                            |                        |   |          |          |      |     |    |             |
| UNSB01.fasta                            | Cele-UNSB01_5:19009672 | 5 | 19009672 | 19010877 | 1206 | 61  | 20 | AAAAATAGAT  |
| AAAAATAGATTGTTACACGA                    |                        |   |          |          |      |     |    |             |
| UNSB01.fasta                            | Cele-UNSB01_5:19020255 | 5 | 19020255 | 19020473 | 219  | 6   | 31 | TGTAAAAATG  |
| TGAAAAAATGTCTGAACTTCCAATTTACAA          |                        |   |          |          |      |     |    |             |
| UNSB01.fasta                            | Cele-UNSB01_5:19059372 | 5 | 19059372 | 19059511 | 140  | 4   | 35 | TCAGAAAATT  |
| TCAGAAAATTTAAATTTCCCTCCAAAATTTTTTC      |                        |   |          |          |      |     |    |             |
| UNSB01.fasta                            | Cele-UNSB01_5:19079815 | 5 | 19079815 | 19080004 | 190  | 5   | 24 | GCCTAAGCCT  |
| GCCTAAACCTAACCCGAGTCTAG                 |                        |   |          |          |      |     |    |             |
| UNSB01.fasta                            | Cele-UNSB01_5:19138115 | 5 | 19138115 | 19138319 | 205  | 6   | 31 | TCGTTTTTTTC |
| TCGTTTTTTTCATGAAAAAACTCAATTTTCCG        |                        |   |          |          |      |     |    |             |
| UNSB01.fasta                            | Cele-UNSB01_5:19147729 | 5 | 19147729 | 19148084 | 356  | 7   | 40 | GAATTTTTTTG |
| GAATTTTTTGCAATTTTATGAATTTTCCAAATTTTCAGC |                        |   |          |          |      |     |    |             |
| UNSB01.fasta                            | Cele-UNSB01_5:19162213 | 5 | 19162213 | 19162392 | 180  | 5   | 40 | TTTTGCCGAA  |
| TTTTACCGAAAATTGCAAATTTGTGGAATGTATCACATT |                        |   |          |          |      |     |    |             |
| UNSB01.fasta                            | Cele-UNSB01_5:19164473 | 5 | 19164473 | 19167625 | 3153 | 148 | 17 | ATTAGCAGCG  |
| TTAGCAGCGACCAAAA                        |                        |   |          |          |      |     |    |             |
| UNSB01.fasta                            | Cele-UNSB01_5:19170107 | 5 | 19170107 | 19171106 | 1000 | 12  | 18 | AATTAGCAGC  |
| AATTAGCAGCGACCAAAA                      |                        |   |          |          |      |     |    |             |
| UNSB01.fasta                            | Cele-UNSB01_5:19172684 | 5 | 19172684 | 19173158 | 475  | 14  | 32 | TTGTAGTTTG  |
| TTGTAGTTTGTAGTCTAAGCAGCGCCCAAAAC        |                        |   |          |          |      |     |    |             |
| UNSB01.fasta                            | Cele-UNSB01_5:19225003 | 5 | 19225003 | 19225171 | 169  | 8   | 21 | ATTATTGATT  |
| ATTATCGATTTTTGAAGGGAA                   |                        |   |          |          |      |     |    |             |

|                                   |                        |   |          |          |      |     |    |             |
|-----------------------------------|------------------------|---|----------|----------|------|-----|----|-------------|
| UNSB01.fasta                      | Cele-UNSB01_5:19249579 | 5 | 19249579 | 19249688 | 110  | 6   | 18 | AGCAGCGCCC  |
| AGCAGCGCCCCAAAAAAT                |                        |   |          |          |      |     |    |             |
| UNSB01.fasta                      | Cele-UNSB01_5:19251983 | 5 | 19251983 | 19252110 | 128  | 5   | 18 | GCAGCGCCCA  |
| GCAGCGCCCCAAAAGATTA               |                        |   |          |          |      |     |    |             |
| UNSB01.fasta                      | Cele-UNSB01_5:19255197 | 5 | 19255197 | 19255501 | 305  | 17  | 18 | TGCTAATTTT  |
| TGCTAATTTTTTTGGCGC                |                        |   |          |          |      |     |    |             |
| UNSB01.fasta                      | Cele-UNSB01_5:19270843 | 5 | 19270843 | 19271693 | 851  | 31  | 20 | ATTTATTGAT  |
| ATTTATCGATTTTCTGTAA               |                        |   |          |          |      |     |    |             |
| UNSB01.fasta                      | Cele-UNSB01_5:19272660 | 5 | 19272660 | 19272781 | 122  | 6   | 20 | ATAAATTTTC  |
| ATAAATTTTCAGAAAAATCG              |                        |   |          |          |      |     |    |             |
| UNSB01.fasta                      | Cele-UNSB01_5:19273514 | 5 | 19273514 | 19273585 | 72   | 4   | 18 | TAGCAGCGCC  |
| TAGCAGCGCCAAGAAAT                 |                        |   |          |          |      |     |    |             |
| UNSB01.fasta                      | Cele-UNSB01_5:19275863 | 5 | 19275863 | 19276354 | 492  | 14  | 32 | TGTAGTTTGT  |
| TGTAGTTTGTAGTTTAGCAGCGCCCAAAATTG  |                        |   |          |          |      |     |    |             |
| UNSB01.fasta                      | Cele-UNSB01_5:19279992 | 5 | 19279992 | 19280235 | 244  | 8   | 20 | TATCGATTTT  |
| TATCGATTTTCTGCAAATT               |                        |   |          |          |      |     |    |             |
| UNSB01.fasta                      | Cele-UNSB01_5:19309007 | 5 | 19309007 | 19310074 | 1068 | 10  | 19 | TGGCGCATTT  |
| TGGCGGTTTTCGGTGTGT                |                        |   |          |          |      |     |    |             |
| UNSB01.fasta                      | Cele-UNSB01_5:19313130 | 5 | 19313130 | 19313974 | 845  | 33  | 20 | AAAATCGATA  |
| ATAATCGATAAATCCCAGA               |                        |   |          |          |      |     |    |             |
| UNSB01.fasta                      | Cele-UNSB01_5:19325271 | 5 | 19325271 | 19325379 | 109  | 9   | 12 | ATACATATAC  |
| ATACATATACAT                      |                        |   |          |          |      |     |    |             |
| UNSB01.fasta                      | Cele-UNSB01_5:19329973 | 5 | 19329973 | 19330169 | 197  | 8   | 12 | ATATGTATAT  |
| ATATGTATATGT                      |                        |   |          |          |      |     |    |             |
| UNSB01.fasta                      | Cele-UNSB01_5:19334298 | 5 | 19334298 | 19334625 | 328  | 23  | 14 | TATATGTTAT  |
| TATATGTTATATGT                    |                        |   |          |          |      |     |    |             |
| UNSB01.fasta                      | Cele-UNSB01_5:19338537 | 5 | 19338537 | 19338764 | 228  | 7   | 33 | GGAATTCAAA  |
| GGAATTCAAATTTCTTCAAAAAAATTTGGCG   |                        |   |          |          |      |     |    |             |
| UNSB01.fasta                      | Cele-UNSB01_5:19352170 | 5 | 19352170 | 19352944 | 775  | 29  | 26 | TGAAATTTCA  |
| TGAAATTTCAAAAATATCGATTTTC         |                        |   |          |          |      |     |    |             |
| UNSB01.fasta                      | Cele-UNSB01_5:19385136 | 5 | 19385136 | 19386466 | 1331 | 44  | 20 | AAAAATCAAT  |
| AAAAATCAATCAATTTCCGA              |                        |   |          |          |      |     |    |             |
| UNSB01.fasta                      | Cele-UNSB01_5:19386514 | 5 | 19386514 | 19386960 | 447  | 10  | 20 | ATTGATTTTT  |
| ATTGATTTTTCTGAAAATT               |                        |   |          |          |      |     |    |             |
| UNSB01.fasta                      | Cele-UNSB01_5:19387732 | 5 | 19387732 | 19388133 | 402  | 17  | 20 | CAGAAAAATC  |
| CAGAAAAATCGATAAATTTT              |                        |   |          |          |      |     |    |             |
| UNSB01.fasta                      | Cele-UNSB01_5:19392335 | 5 | 19392335 | 19392460 | 126  | 6   | 18 | ATTAGCAGCG  |
| ATTAGCAGCGACCAAAAA                |                        |   |          |          |      |     |    |             |
| UNSB01.fasta                      | Cele-UNSB01_5:19398669 | 5 | 19398669 | 19400674 | 2006 | 80  | 20 | TATCGATTTT  |
| TATTGATTTTCTGAAAATT               |                        |   |          |          |      |     |    |             |
| UNSB01.fasta                      | Cele-UNSB01_5:19404337 | 5 | 19404337 | 19404490 | 154  | 5   | 33 | TTAGCAGCGC  |
| TTAGCAGCGCCCAAAATCTTGTAGTTTGTAGTC |                        |   |          |          |      |     |    |             |
| UNSB01.fasta                      | Cele-UNSB01_5:19407563 | 5 | 19407563 | 19408121 | 559  | 25  | 20 | AATTTATTGA  |
| AATTTATTGATTTTCCGGA               |                        |   |          |          |      |     |    |             |
| UNSB01.fasta                      | Cele-UNSB01_5:19408877 | 5 | 19408877 | 19410842 | 1966 | 65  | 33 | AGCAGCGCCC  |
| AGCAGCGCCCAAAATCTTGTAGTTTGTAGTCTT |                        |   |          |          |      |     |    |             |
| UNSB01.fasta                      | Cele-UNSB01_5:19416239 | 5 | 19416239 | 19417040 | 802  | 34  | 20 | GATTTTTTCTG |
| GATTTTTTCTGAAAATATATC             |                        |   |          |          |      |     |    |             |
| UNSB01.fasta                      | Cele-UNSB01_5:19434732 | 5 | 19434732 | 19435093 | 362  | 16  | 19 | TGGCGCATTT  |
| TGGCGCATTTCTTGAGCCT               |                        |   |          |          |      |     |    |             |
| UNSB01.fasta                      | Cele-UNSB01_5:19480245 | 5 | 19480245 | 19483641 | 3397 | 189 | 18 | GCTGCTAATT  |
| GCTGCTAATTTTTTGGGC                |                        |   |          |          |      |     |    |             |
| UNSB01.fasta                      | Cele-UNSB01_5:19517858 | 5 | 19517858 | 19518362 | 505  | 37  | 12 | AGGCTCAGGC  |
| AGGCTCAGGCTC                      |                        |   |          |          |      |     |    |             |
| UNSB01.fasta                      | Cele-UNSB01_5:19521326 | 5 | 19521326 | 19521536 | 211  | 15  | 12 | GCCTAAGCCT  |
| GCCTGAGCCTGA                      |                        |   |          |          |      |     |    |             |
| UNSB01.fasta                      | Cele-UNSB01_5:19549755 | 5 | 19549755 | 19549902 | 148  | 7   | 21 | CACACGAGCT  |
| CACACGATCTTCAGATTCCAC             |                        |   |          |          |      |     |    |             |

|                                                                                                                                                    |                        |   |          |          |      |    |     |            |
|----------------------------------------------------------------------------------------------------------------------------------------------------|------------------------|---|----------|----------|------|----|-----|------------|
| UNSB01.fasta                                                                                                                                       | Cele-UNSB01_5:19567297 | 5 | 19567297 | 19567464 | 168  | 5  | 29  | CTCGTCAGTG |
| CTCGTCAGTGGGTGGACGAGGAATGAGCG                                                                                                                      |                        |   |          |          |      |    |     |            |
| UNSB01.fasta                                                                                                                                       | Cele-UNSB01_5:19604230 | 5 | 19604230 | 19604355 | 126  | 4  | 22  | GTGCGCAGAA |
| GTGCGCAGAATCTGCTCAGGGG                                                                                                                             |                        |   |          |          |      |    |     |            |
| UNSB01.fasta                                                                                                                                       | Cele-UNSB01_5:19643678 | 5 | 19643678 | 19643940 | 263  | 11 | 21  | TCTAATTAGA |
| TCAAATTAGATTACCTTTTTT                                                                                                                              |                        |   |          |          |      |    |     |            |
| UNSB01.fasta                                                                                                                                       | Cele-UNSB01_5:19645516 | 5 | 19645516 | 19645794 | 279  | 13 | 21  | TTCTAATTAG |
| TTCTAATTAGATGCGCATTCC                                                                                                                              |                        |   |          |          |      |    |     |            |
| UNSB01.fasta                                                                                                                                       | Cele-UNSB01_5:19666114 | 5 | 19666114 | 19666380 | 267  | 11 | 19  | GATCCTTGGC |
| GATCCTTAGCGCTTTTTTT                                                                                                                                |                        |   |          |          |      |    |     |            |
| UNSB01.fasta                                                                                                                                       | Cele-UNSB01_5:19667001 | 5 | 19667001 | 19667210 | 210  | 9  | 19  | TTGCGCCAAG |
| TTGCGTCAAGACACTAAAA                                                                                                                                |                        |   |          |          |      |    |     |            |
| UNSB01.fasta                                                                                                                                       | Cele-UNSB01_5:19670399 | 5 | 19670399 | 19670678 | 280  | 9  | 31  | CGGGAAATTC |
| CGGGAAATTTGAATTTTCGAATAATTTTGG                                                                                                                     |                        |   |          |          |      |    |     |            |
| UNSB01.fasta                                                                                                                                       | Cele-UNSB01_5:19673680 | 5 | 19673680 | 19673832 | 153  | 5  | 19  | AGAATTGCGC |
| AGAATTGCGCCAAGGCACG                                                                                                                                |                        |   |          |          |      |    |     |            |
| UNSB01.fasta                                                                                                                                       | Cele-UNSB01_5:19673879 | 5 | 19673879 | 19674316 | 438  | 16 | 19  | GCCTTGACGC |
| GCCTTGACGCAATTCTAGC                                                                                                                                |                        |   |          |          |      |    |     |            |
| UNSB01.fasta                                                                                                                                       | Cele-UNSB01_5:19696042 | 5 | 19696042 | 19696279 | 238  | 14 | 17  | GAATTAGAAA |
| GAATTAGAAAACCTTTGA                                                                                                                                 |                        |   |          |          |      |    |     |            |
| UNSB01.fasta                                                                                                                                       | Cele-UNSB01_5:19714208 | 5 | 19714208 | 19714335 | 128  | 5  | 25  | AAAAATCTGT |
| AAAAATCTGTTCTCAGAGGTCCCTG                                                                                                                          |                        |   |          |          |      |    |     |            |
| UNSB01.fasta                                                                                                                                       | Cele-UNSB01_5:19721189 | 5 | 19721189 | 19721423 | 235  | 7  | 22  | ACGTATACAG |
| ACGTATACAGTCATATACACAT                                                                                                                             |                        |   |          |          |      |    |     |            |
| UNSB01.fasta                                                                                                                                       | Cele-UNSB01_5:19721079 | 5 | 19721079 | 19721595 | 517  | 5  | 21  | TATTTTCAAA |
| TATTTTCAAAAAATTAAAA                                                                                                                                |                        |   |          |          |      |    |     |            |
| UNSB01.fasta                                                                                                                                       | Cele-UNSB01_5:19764010 | 5 | 19764010 | 19764338 | 329  | 4  | 82  | CCCCGAACGT |
| CCCCGAACGTGTCGCCGCTTCCAAATAACCACCTCCTTGCACTACGTTGCGCACACACTCATTTACGCCAAGCTGCGGAA                                                                   |                        |   |          |          |      |    |     |            |
| UNSB01.fasta                                                                                                                                       | Cele-UNSB01_5:19784949 | 5 | 19784949 | 19785086 | 138  | 6  | 23  | TTTTCAGAAA |
| TTTTCAGAAATAGACATTTCAGA                                                                                                                            |                        |   |          |          |      |    |     |            |
| UNSB01.fasta                                                                                                                                       | Cele-UNSB01_5:19785568 | 5 | 19785568 | 19787058 | 1491 | 85 | 17  | TTGCAAGAAA |
| TTGCAAGAAAATCTGCA                                                                                                                                  |                        |   |          |          |      |    |     |            |
| UNSB01.fasta                                                                                                                                       | Cele-UNSB01_5:19792773 | 5 | 19792773 | 19792843 | 71   | 5  | 10  | TGGCGAAAGC |
| TGGCGAAAGC                                                                                                                                         |                        |   |          |          |      |    |     |            |
| UNSB01.fasta                                                                                                                                       | Cele-UNSB01_5:19792863 | 5 | 19792863 | 19792928 | 66   | 5  | 13  | TTGGGGTGGG |
| TTGGGGTGGGCCT                                                                                                                                      |                        |   |          |          |      |    |     |            |
| UNSB01.fasta                                                                                                                                       | Cele-UNSB01_5:19795988 | 5 | 19795988 | 19796719 | 732  | 4  | 183 | TTTCTCTGCG |
| TTTCTCTGCGTCTCGCCTTGGCTCACAGTATTTTTCACACCAAACCTTCGAGGCTATGTATCTTTGCAACGGGTGAGATATTGAAAAATTTCCAATAACAAAATGCTCTAAAATTTATTCTGTATCTTGTGAAATAAACTTTAAAC |                        |   |          |          |      |    |     |            |
| CTAGGCAAATCGCAAACAGCGAAATACACCCAAG                                                                                                                 |                        |   |          |          |      |    |     |            |
| UNSB01.fasta                                                                                                                                       | Cele-UNSB01_5:19815492 | 5 | 19815492 | 19815850 | 359  | 22 | 12  | CTTAGGCTTA |
| CTTAGGCTTAGG                                                                                                                                       |                        |   |          |          |      |    |     |            |
| UNSB01.fasta                                                                                                                                       | Cele-UNSB01_5:19826165 | 5 | 19826165 | 19826303 | 139  | 11 | 12  | CTTAGGCTTA |
| CTTAGGCTTAGG                                                                                                                                       |                        |   |          |          |      |    |     |            |
| UNSB01.fasta                                                                                                                                       | Cele-UNSB01_5:19832755 | 5 | 19832755 | 19833004 | 250  | 6  | 31  | AATTTCCCGC |
| AATTTCCCGCTAAAAATTAAGTAAAAATTTG                                                                                                                    |                        |   |          |          |      |    |     |            |
| UNSB01.fasta                                                                                                                                       | Cele-UNSB01_5:19848468 | 5 | 19848468 | 19849404 | 937  | 7  | 14  | TTTGTAGTTT |
| TTTGTACTTTGTAG                                                                                                                                     |                        |   |          |          |      |    |     |            |
| UNSB01.fasta                                                                                                                                       | Cele-UNSB01_5:19849444 | 5 | 19849444 | 19849810 | 367  | 11 | 14  | ACAACTACA  |
| ACAACTACATACT                                                                                                                                      |                        |   |          |          |      |    |     |            |
| UNSB01.fasta                                                                                                                                       | Cele-UNSB01_5:19852888 | 5 | 19852888 | 19853192 | 305  | 8  | 27  | GCAGCCGACA |
| GCAGCCGACACCTCACAGGTCCCTGTA                                                                                                                        |                        |   |          |          |      |    |     |            |
| UNSB01.fasta                                                                                                                                       | Cele-UNSB01_5:19913255 | 5 | 19913255 | 19913615 | 361  | 8  | 31  | TTCAAATTTT |
| TTCAAATTTTCAGTCAATTTTGGCGGGAGT                                                                                                                     |                        |   |          |          |      |    |     |            |
| UNSB01.fasta                                                                                                                                       | Cele-UNSB01_5:19928437 | 5 | 19928437 | 19928836 | 400  | 12 | 31  | GGCGGGAAAT |
| GGCGGGAAATTCAAATTTTCAGTCAATTTT                                                                                                                     |                        |   |          |          |      |    |     |            |
| UNSB01.fasta                                                                                                                                       | Cele-UNSB01_5:19938977 | 5 | 19938977 | 19939376 | 400  | 12 | 31  | GGCGGGAAAT |
| GGCGGGAAATTCAAATTTTCAGTCAATTTT                                                                                                                     |                        |   |          |          |      |    |     |            |
| UNSB01.fasta                                                                                                                                       | Cele-UNSB01_5:19953202 | 5 | 19953202 | 19953370 | 169  | 6  | 21  | ACCCCGATTT |
| ACTCCGATTTTCATCCAAAAA                                                                                                                              |                        |   |          |          |      |    |     |            |

|                                          |                        |   |          |          |      |     |    |             |
|------------------------------------------|------------------------|---|----------|----------|------|-----|----|-------------|
| UNSB01.fasta                             | Cele-UNSB01_5:19987417 | 5 | 19987417 | 19987506 | 90   | 4   | 22 | ATTGGATTTT  |
| ATTGGATTTTTCACCCCAAAAA                   |                        |   |          |          |      |     |    |             |
| UNSB01.fasta                             | Cele-UNSB01_5:19998052 | 5 | 19998052 | 19998541 | 490  | 10  | 31 | AAAATTTGAA  |
| AAAATTTGAATTTCCCGCCAAAAATTGACTG          |                        |   |          |          |      |     |    |             |
| UNSB01.fasta                             | Cele-UNSB01_5:20061429 | 5 | 20061429 | 20063397 | 1969 | 117 | 16 | CTTAGATCTC  |
| CTTAGATCTCAATTCA                         |                        |   |          |          |      |     |    |             |
| UNSB01.fasta                             | Cele-UNSB01_5:20065513 | 5 | 20065513 | 20066023 | 511  | 14  | 34 | TTTCCCGCCA  |
| TTTCCCGCCAAAATAATTTCTCCGAAAAATTTGTA      |                        |   |          |          |      |     |    |             |
| UNSB01.fasta                             | Cele-UNSB01_5:20072393 | 5 | 20072393 | 20073779 | 1387 | 40  | 35 | CCGGCAAATC  |
| CCGGCAAATCGACAAATTGCCGGATTTGTAAATTT      |                        |   |          |          |      |     |    |             |
| UNSB01.fasta                             | Cele-UNSB01_5:20105608 | 5 | 20105608 | 20107135 | 1528 | 40  | 35 | GAAATTTTCA  |
| GAAATTTTCATTTCCGGCAAATTACTGATCTGCCG      |                        |   |          |          |      |     |    |             |
| UNSB01.fasta                             | Cele-UNSB01_5:20109112 | 5 | 20109112 | 20109540 | 429  | 12  | 35 | AATTTCCGGC  |
| AATTTCCGGCAATACGGCAAATTACCAGAATTAAA      |                        |   |          |          |      |     |    |             |
| UNSB01.fasta                             | Cele-UNSB01_5:20111577 | 5 | 20111577 | 20111694 | 118  | 5   | 12 | AAGCCTAAGC  |
| AAGCCTAATCTT                             |                        |   |          |          |      |     |    |             |
| UNSB01.fasta                             | Cele-UNSB01_5:20131328 | 5 | 20131328 | 20132164 | 837  | 37  | 19 | TAGTGCCTTG  |
| TAGTGCATTGGCGCAATTC                      |                        |   |          |          |      |     |    |             |
| UNSB01.fasta                             | Cele-UNSB01_5:20173699 | 5 | 20173699 | 20174897 | 1199 | 28  | 31 | TTCCCGCCTA  |
| TTCCCGCCTAAACTACTCGAAAATTCAAAT           |                        |   |          |          |      |     |    |             |
| UNSB01.fasta                             | Cele-UNSB01_5:20176707 | 5 | 20176707 | 20177444 | 738  | 21  | 33 | TTTGAATTTT  |
| TTTGAATTTTCCACCAATATTTTCTCAAAAAT         |                        |   |          |          |      |     |    |             |
| UNSB01.fasta                             | Cele-UNSB01_5:20212391 | 5 | 20212391 | 20212631 | 241  | 10  | 20 | TTATTGATTT  |
| TTATTGATTTTCTGGGAAT                      |                        |   |          |          |      |     |    |             |
| UNSB01.fasta                             | Cele-UNSB01_5:20217981 | 5 | 20217981 | 20218181 | 201  | 9   | 20 | CAGAAAAATC  |
| CAGAAAAATCAATAAATTTT                     |                        |   |          |          |      |     |    |             |
| UNSB01.fasta                             | Cele-UNSB01_5:20220047 | 5 | 20220047 | 20220618 | 572  | 12  | 20 | TTATTGATTT  |
| TTATCGATTTTATGGAAAT                      |                        |   |          |          |      |     |    |             |
| UNSB01.fasta                             | Cele-UNSB01_5:20243571 | 5 | 20243571 | 20245480 | 1910 | 58  | 32 | ACTACAAACT  |
| ACTACAAACTACAAGTTTTTTGGCGCTGCTAA         |                        |   |          |          |      |     |    |             |
| UNSB01.fasta                             | Cele-UNSB01_5:20247169 | 5 | 20247169 | 20247404 | 236  | 11  | 20 | TTTGAATTTT  |
| TTTGAATTTTGGAGTGAAAA                     |                        |   |          |          |      |     |    |             |
| UNSB01.fasta                             | Cele-UNSB01_5:20269010 | 5 | 20269010 | 20269323 | 314  | 8   | 12 | TATGTATATG  |
| TATGTATATGTA                             |                        |   |          |          |      |     |    |             |
| UNSB01.fasta                             | Cele-UNSB01_5:20275164 | 5 | 20275164 | 20275248 | 85   | 4   | 21 | CTCAATTCAA  |
| CTCAATTCAATCAAGGAAATT                    |                        |   |          |          |      |     |    |             |
| UNSB01.fasta                             | Cele-UNSB01_5:20277753 | 5 | 20277753 | 20277891 | 139  | 11  | 12 | ATATACATAT  |
| ATATACATATAC                             |                        |   |          |          |      |     |    |             |
| UNSB01.fasta                             | Cele-UNSB01_5:20304611 | 5 | 20304611 | 20305126 | 516  | 14  | 32 | AAATTTGAAT  |
| AAATTTGAATTCCTCGCCAAAATTTTTCACCGA        |                        |   |          |          |      |     |    |             |
| UNSB01.fasta                             | Cele-UNSB01_5:20312857 | 5 | 20312857 | 20314295 | 1439 | 50  | 12 | GCTTGGGCTT  |
| GCTTGGGCTTAG                             |                        |   |          |          |      |     |    |             |
| UNSB01.fasta                             | Cele-UNSB01_5:20413138 | 5 | 20413138 | 20414402 | 1265 | 44  | 32 | TTTTGGGCGC  |
| TTTTGGGCGCTGCTTAGACTATAAACTACAAT         |                        |   |          |          |      |     |    |             |
| UNSB01.fasta                             | Cele-UNSB01_5:20465532 | 5 | 20465532 | 20465791 | 260  | 7   | 37 | AATTTGAATT  |
| AATTTGAATTCCTCGCCAAAATATTTTGAATAATTAA    |                        |   |          |          |      |     |    |             |
| UNSB01.fasta                             | Cele-UNSB01_5:20522553 | 5 | 20522553 | 20523111 | 559  | 29  | 18 | CATTGTCACT  |
| CATTGTCACGTTCTTCTC                       |                        |   |          |          |      |     |    |             |
| UNSB01.fasta                             | Cele-UNSB01_5:20548445 | 5 | 20548445 | 20548748 | 304  | 5   | 41 | GCATTTTTCG  |
| GCATTTTTCGCCGATTTTTCACTATTTTTCGTGAAAATTC |                        |   |          |          |      |     |    |             |
| UNSB01.fasta                             | Cele-UNSB01_5:20558603 | 5 | 20558603 | 20558932 | 330  | 11  | 30 | CTCAAAATTTG |
| CTCAAAATTTGCACTAAAAATTCGAATTTT           |                        |   |          |          |      |     |    |             |
| UNSB01.fasta                             | Cele-UNSB01_5:20572226 | 5 | 20572226 | 20572853 | 628  | 16  | 11 | CTACAGTACT  |
| CTACAGTACTA                              |                        |   |          |          |      |     |    |             |
| UNSB01.fasta                             | Cele-UNSB01_5:20575835 | 5 | 20575835 | 20576061 | 227  | 7   | 32 | TTAGCAGCGC  |
| TTAGCAGCGCCCAAACTTGTAGTTTGTAGT           |                        |   |          |          |      |     |    |             |
| UNSB01.fasta                             | Cele-UNSB01_5:20579964 | 5 | 20579964 | 20580501 | 538  | 15  | 31 | CTACAAACTA  |
| CTACAAACTACTAGTTTTGGGCGCTGCTAAG          |                        |   |          |          |      |     |    |             |

|                                                                                                                           |                        |   |          |          |       |     |     |            |
|---------------------------------------------------------------------------------------------------------------------------|------------------------|---|----------|----------|-------|-----|-----|------------|
| UNSB01.fasta                                                                                                              | Cele-UNSB01_5:20584979 | 5 | 20584979 | 20587201 | 2223  | 68  | 31  | GGCGCTGCTA |
| GGCGCTGCTAAACTACAACTACAAGAATTG                                                                                            |                        |   |          |          |       |     |     |            |
| UNSB01.fasta                                                                                                              | Cele-UNSB01_5:20627832 | 5 | 20627832 | 20628586 | 755   | 12  | 42  | ATTGCCGGTT |
| ATTGCCGGTTTGAACATTTTCGGCAATTCGGCAATTTTCGGCA                                                                               |                        |   |          |          |       |     |     |            |
| UNSB01.fasta                                                                                                              | Cele-UNSB01_5:20719213 | 5 | 20719213 | 20719394 | 182   | 9   | 20  | AAAATTCAAA |
| AAAATTCAAATTTTTTGACTG                                                                                                     |                        |   |          |          |       |     |     |            |
| UNSB01.fasta                                                                                                              | Cele-UNSB01_5:20720350 | 5 | 20720350 | 20720568 | 219   | 4   | 31  | GAAAAAGTGC |
| GAAAAAGTGCTGAAAAGCACATTTTCAGAAG                                                                                           |                        |   |          |          |       |     |     |            |
| UNSB01.fasta                                                                                                              | Cele-UNSB01_5:20786599 | 5 | 20786599 | 20786882 | 284   | 9   | 32  | CCGCCAAAAT |
| CCGCCAAAATGTTTCTTTGAAAATTTGAATTC                                                                                          |                        |   |          |          |       |     |     |            |
| UNSB01.fasta                                                                                                              | Cele-UNSB01_5:20839531 | 5 | 20839531 | 20839647 | 117   | 5   | 16  | GTACTAGGGT |
| GTACTGGGGTACTGGG                                                                                                          |                        |   |          |          |       |     |     |            |
| UNSB01.fasta                                                                                                              | Cele-UNSB01_5:20903761 | 5 | 20903761 | 20903966 | 206   | 5   | 11  | CCTACAGTAC |
| CCTACAGTACT                                                                                                               |                        |   |          |          |       |     |     |            |
| UNSB01.fasta                                                                                                              | Cele-UNSB01_5:20920761 | 5 | 20920761 | 20921207 | 447   | 40  | 11  | GTTGCGGTTG |
| GTTGCGATTGC                                                                                                               |                        |   |          |          |       |     |     |            |
| UNSB01.fasta                                                                                                              | Cele-UNSB01_5:21020210 | 5 | 21020210 | 21020336 | 127   | 4   | 32  | GTGCGTCCGG |
| GTGCGTCCGGCGTCCGAAAAAGCGGACGCGT                                                                                           |                        |   |          |          |       |     |     |            |
| UNSB01.fasta                                                                                                              | Cele-UNSB01_5:21154449 | 5 | 21154449 | 21154526 | 78    | 5   | 15  | CGAAAAGGGG |
| CGAAAAGGGGATCTG                                                                                                           |                        |   |          |          |       |     |     |            |
| UNSB01.fasta                                                                                                              | Cele-UNSB01_5:21154702 | 5 | 21154702 | 21154779 | 78    | 5   | 15  | CCCCTTTTCG |
| CCCCTTTTCGTATCT                                                                                                           |                        |   |          |          |       |     |     |            |
| UNSB01.fasta                                                                                                              | Cele-UNSB01_5:21238953 | 5 | 21238953 | 21243221 | 4269  | 353 | 12  | TTAGGCTTAG |
| TTAGGCTTAGGC                                                                                                              |                        |   |          |          |       |     |     |            |
| UNSB01.fasta                                                                                                              | Cele-UNSB01_6:1        | 6 | 1        | 2653     | 2653  | 219 | 12  | AAGCCTAAGC |
| AAGCCTAAGCCT                                                                                                              |                        |   |          |          |       |     |     |            |
| UNSB01.fasta                                                                                                              | Cele-UNSB01_6:40792    | 6 | 40792    | 40926    | 135   | 5   | 11  | GTACTGTAGT |
| GTACTGTAGTA                                                                                                               |                        |   |          |          |       |     |     |            |
| UNSB01.fasta                                                                                                              | Cele-UNSB01_6:122121   | 6 | 122121   | 133095   | 10975 | 405 | 27  | ACAGAGAGTA |
| ACAGAGAGTAAAATAATCGATGAAGCC                                                                                               |                        |   |          |          |       |     |     |            |
| UNSB01.fasta                                                                                                              | Cele-UNSB01_6:161019   | 6 | 161019   | 161648   | 630   | 17  | 35  | GGGAAATTCA |
| GGGAAATTCAAATTTTTTATGAAAATATTTTTGGC                                                                                       |                        |   |          |          |       |     |     |            |
| UNSB01.fasta                                                                                                              | Cele-UNSB01_6:161741   | 6 | 161741   | 162501   | 761   | 19  | 40  | GAAAATTCTG |
| GAAAATTCTGGAATGTTCCACAACCTTTCTAGAAAAATCGG                                                                                 |                        |   |          |          |       |     |     |            |
| UNSB01.fasta                                                                                                              | Cele-UNSB01_6:179889   | 6 | 179889   | 180069   | 181   | 5   | 32  | TTAGCAGCGC |
| TTAGCAGCGCCCAATCTTGTAGTTTGTAGTG                                                                                           |                        |   |          |          |       |     |     |            |
| UNSB01.fasta                                                                                                              | Cele-UNSB01_6:180452   | 6 | 180452   | 180557   | 106   | 7   | 15  | GTCTCACCAC |
| GTCTCACCACGATGG                                                                                                           |                        |   |          |          |       |     |     |            |
| UNSB01.fasta                                                                                                              | Cele-UNSB01_6:187518   | 6 | 187518   | 187756   | 239   | 6   | 40  | TTCCAGAATT |
| TTCCAGAATTTTCTCGATTTTCTAGAAAGTTCTGGAACA                                                                                   |                        |   |          |          |       |     |     |            |
| UNSB01.fasta                                                                                                              | Cele-UNSB01_6:188088   | 6 | 188088   | 188493   | 406   | 27  | 15  | ACGATGGGTC |
| ACGACGGGTCTCACT                                                                                                           |                        |   |          |          |       |     |     |            |
| UNSB01.fasta                                                                                                              | Cele-UNSB01_6:207322   | 6 | 207322   | 209932   | 2611  | 80  | 32  | TTTGGGCGCT |
| TTTGGGCGCTGCTAAGACTACAACTACAATG                                                                                           |                        |   |          |          |       |     |     |            |
| UNSB01.fasta                                                                                                              | Cele-UNSB01_6:210105   | 6 | 210105   | 210613   | 509   | 10  | 20  | AAAAATCAAT |
| AAAAATCAATAAATTCCAA                                                                                                       |                        |   |          |          |       |     |     |            |
| UNSB01.fasta                                                                                                              | Cele-UNSB01_6:229151   | 6 | 229151   | 229455   | 305   | 8   | 36  | ATAAAAAATT |
| ATAAAAAATTTCCGGCAAACCGGCAATTTGTCTAGAAA                                                                                    |                        |   |          |          |       |     |     |            |
| UNSB01.fasta                                                                                                              | Cele-UNSB01_6:276570   | 6 | 276570   | 276632   | 63    | 4   | 15  | CGAAAAGGGG |
| CGAAAAGGGGATCTG                                                                                                           |                        |   |          |          |       |     |     |            |
| UNSB01.fasta                                                                                                              | Cele-UNSB01_6:276806   | 6 | 276806   | 276883   | 78    | 5   | 15  | TCCCCTTTTC |
| TCCCCTTTTCGTAGA                                                                                                           |                        |   |          |          |       |     |     |            |
| UNSB01.fasta                                                                                                              | Cele-UNSB01_6:309569   | 6 | 309569   | 317496   | 7928  | 66  | 119 | GGCCACCGTT |
| GGCCACCGTTCCATATTTTCGCAATAATTTTTACGGGAACGTAATCTCCACATCACCAGCTTTTCAATTTAAGTACCCACACGCGTTGGTTTTAATTTTAAATTTGGTCGCGGATTTTCTC |                        |   |          |          |       |     |     |            |
| UNSB01.fasta                                                                                                              | Cele-UNSB01_6:350789   | 6 | 350      |          |       |     |     |            |

|                                                                                                        |                       |   |         |         |      |     |     |             |
|--------------------------------------------------------------------------------------------------------|-----------------------|---|---------|---------|------|-----|-----|-------------|
| UNSB01.fasta                                                                                           | Cele-UNSB01_6:444285  | 6 | 444285  | 444373  | 89   | 7   | 11  | CATAACTGAG  |
| CATAACTGAGA                                                                                            |                       |   |         |         |      |     |     |             |
| UNSB01.fasta                                                                                           | Cele-UNSB01_6:483296  | 6 | 483296  | 484174  | 879  | 19  | 40  | AAAATTCTGG  |
| AAAATTCTGGAATGTTCTAGAACCTTCTGGAAAGTTTCGAG                                                              |                       |   |         |         |      |     |     |             |
| UNSB01.fasta                                                                                           | Cele-UNSB01_6:556288  | 6 | 556288  | 556934  | 647  | 15  | 15  | CCACGATGGG  |
| CCACGGTGGGTCTCA                                                                                        |                       |   |         |         |      |     |     |             |
| UNSB01.fasta                                                                                           | Cele-UNSB01_6:556993  | 6 | 556993  | 557132  | 140  | 5   | 30  | AATTTTCCAG  |
| AATTTTCCAGAAGGTTCTGGAACATTCCAG                                                                         |                       |   |         |         |      |     |     |             |
| UNSB01.fasta                                                                                           | Cele-UNSB01_6:743518  | 6 | 743518  | 743644  | 127  | 5   | 21  | GGTCAGTGCA  |
| GGTCAGTGCATTACCAATGTT                                                                                  |                       |   |         |         |      |     |     |             |
| UNSB01.fasta                                                                                           | Cele-UNSB01_6:763886  | 6 | 763886  | 764130  | 245  | 5   | 22  | TGGTCAGTGC  |
| TGGTCAGAGCTGGCGGCCAATC                                                                                 |                       |   |         |         |      |     |     |             |
| UNSB01.fasta                                                                                           | Cele-UNSB01_6:903956  | 6 | 903956  | 904040  | 85   | 4   | 21  | ACTGACCAAA  |
| ACTGACCAAAAATAGACATGC                                                                                  |                       |   |         |         |      |     |     |             |
| UNSB01.fasta                                                                                           | Cele-UNSB01_6:960884  | 6 | 960884  | 960987  | 104  | 5   | 20  | ATGCACTGAC  |
| ATGCACTGACCGAAAAATATG                                                                                  |                       |   |         |         |      |     |     |             |
| UNSB01.fasta                                                                                           | Cele-UNSB01_6:983566  | 6 | 983566  | 988244  | 4679 | 290 | 15  | CACGATGGGT  |
| CACGATGGGTCTCGT                                                                                        |                       |   |         |         |      |     |     |             |
| UNSB01.fasta                                                                                           | Cele-UNSB01_6:988331  | 6 | 988331  | 988610  | 280  | 13  | 11  | CTACAGTACT  |
| CTACAGTACCT                                                                                            |                       |   |         |         |      |     |     |             |
| UNSB01.fasta                                                                                           | Cele-UNSB01_6:998781  | 6 | 998781  | 998865  | 85   | 4   | 21  | CAGTGCATTC  |
| CAGTGCATTCCGAACTTTCGT                                                                                  |                       |   |         |         |      |     |     |             |
| UNSB01.fasta                                                                                           | Cele-UNSB01_6:998801  | 6 | 998801  | 998992  | 192  | 6   | 21  | TCAGTGCATT  |
| TCAGTTCATTAGAAGTTTGG                                                                                   |                       |   |         |         |      |     |     |             |
| UNSB01.fasta                                                                                           | Cele-UNSB01_6:1033071 | 6 | 1033071 | 1033155 | 85   | 4   | 21  | TGGTCAGTGC  |
| TGGTCAGTGCAAGAAACAATT                                                                                  |                       |   |         |         |      |     |     |             |
| UNSB01.fasta                                                                                           | Cele-UNSB01_6:1052300 | 6 | 1052300 | 1052972 | 673  | 4   | 21  | TGACAAAACA  |
| TGACAAAACATAACTTTGCAC                                                                                  |                       |   |         |         |      |     |     |             |
| UNSB01.fasta                                                                                           | Cele-UNSB01_6:1060978 | 6 | 1060978 | 1061104 | 127  | 6   | 21  | GTCAGTGCAT  |
| GTCAGTGCATTGATAGTTTCT                                                                                  |                       |   |         |         |      |     |     |             |
| UNSB01.fasta                                                                                           | Cele-UNSB01_6:1066955 | 6 | 1066955 | 1067057 | 103  | 5   | 20  | TTGGTCAGTG  |
| TTGGTCAGTGCATTTTAGTC                                                                                   |                       |   |         |         |      |     |     |             |
| UNSB01.fasta                                                                                           | Cele-UNSB01_6:1102792 | 6 | 1102792 | 1102897 | 106  | 4   | 21  | GTCAGTGCAA  |
| GTCAGTGTAATTAGAATAATG                                                                                  |                       |   |         |         |      |     |     |             |
| UNSB01.fasta                                                                                           | Cele-UNSB01_6:1106813 | 6 | 1106813 | 1106897 | 85   | 4   | 21  | GTCAGTGCAA  |
| GTCAGTGCAAATTCAAATATT                                                                                  |                       |   |         |         |      |     |     |             |
| UNSB01.fasta                                                                                           | Cele-UNSB01_6:1138488 | 6 | 1138488 | 1138593 | 106  | 5   | 21  | TTGGTCAGTG  |
| TTGGTCAGTGCATTTTTTAA                                                                                   |                       |   |         |         |      |     |     |             |
| UNSB01.fasta                                                                                           | Cele-UNSB01_6:1180467 | 6 | 1180467 | 1185764 | 5298 | 52  | 102 | TGTACACTTC  |
| TGTACACTTCTCCCAAAATGACTGTAAGAATGGACTCCTTATATGATTTTAAACCGACTCTGGACATACAAACTTCTCTCAAAAAGAAAAATAGACTTCACA |                       |   |         |         |      |     |     |             |
| UNSB01.fasta                                                                                           | Cele-UNSB01_6:1259650 | 6 | 1259650 | 1260300 | 651  | 6   | 21  | GTCAGTGCAA  |
| GTCAGTGCAAATGCATTGTTG                                                                                  |                       |   |         |         |      |     |     |             |
| UNSB01.fasta                                                                                           | Cele-UNSB01_6:1324054 | 6 | 1324054 | 1324372 | 319  | 7   | 22  | GTCAGTGCAA  |
| GTCAGTGCAAATTGTGCACATG                                                                                 |                       |   |         |         |      |     |     |             |
| UNSB01.fasta                                                                                           | Cele-UNSB01_6:1338339 | 6 | 1338339 | 1338633 | 295  | 14  | 21  | TTTGCACTGA  |
| TTTGCACTGACCAACACGAGT                                                                                  |                       |   |         |         |      |     |     |             |
| UNSB01.fasta                                                                                           | Cele-UNSB01_6:1342228 | 6 | 1342228 | 1342338 | 111  | 5   | 22  | TCGCACTGAC  |
| TCGCACTGACCAAACTTAGAAA                                                                                 |                       |   |         |         |      |     |     |             |
| UNSB01.fasta                                                                                           | Cele-UNSB01_6:1365926 | 6 | 1365926 | 1366333 | 408  | 5   | 21  | TTGCACTGAC  |
| TTGCACTGACAAAATTTTCGTT                                                                                 |                       |   |         |         |      |     |     |             |
| UNSB01.fasta                                                                                           | Cele-UNSB01_6:1371051 | 6 | 1371051 | 1371242 | 192  | 7   | 21  | TTGCACTGAC  |
| TTGAACTGACAAAGTGCAAAT                                                                                  |                       |   |         |         |      |     |     |             |
| UNSB01.fasta                                                                                           | Cele-UNSB01_6:1379546 | 6 | 1379546 | 1379614 | 69   | 4   | 17  | TGGTCAGTGC  |
| TGGTCAGTGCAAAAAGT                                                                                      |                       |   |         |         |      |     |     |             |
| UNSB01.fasta                                                                                           | Cele-UNSB01_6:1420400 | 6 | 1420400 | 1420757 | 358  | 9   | 40  | ATTTTCTCTAG |
| ATTTTCTAGAAAGTTCTGGAACATTCCAGAGTTTCTCG                                                                 |                       |   |         |         |      |     |     |             |
| UNSB01.fasta                                                                                           | Cele-UNSB01_6:1420856 | 6 | 1420856 | 1421521 | 666  | 19  | 35  | CCCGCCAAAA  |
| CCCGCCAAAAATTTTTTTTTCAGAAAATTTAAATTT                                                                   |                       |   |         |         |      |     |     |             |



|                                                                                                                                                       |                       |   |         |         |       |     |     |            |
|-------------------------------------------------------------------------------------------------------------------------------------------------------|-----------------------|---|---------|---------|-------|-----|-----|------------|
| UNSB01.fasta                                                                                                                                          | Cele-UNSB01_6:1421556 | 6 | 1421556 | 1421900 | 345   | 23  | 15  | CGATGGGTCT |
| CGATGGGTCTCACCA                                                                                                                                       |                       |   |         |         |       |     |     |            |
| UNSB01.fasta                                                                                                                                          | Cele-UNSB01_6:1421957 | 6 | 1421957 | 1422097 | 141   | 5   | 30  | AATTTTCCAG |
| AATTTTCCAGAAAGTTCTGGAACATTCCAG                                                                                                                        |                       |   |         |         |       |     |     |            |
| UNSB01.fasta                                                                                                                                          | Cele-UNSB01_6:1422210 | 6 | 1422210 | 1422590 | 381   | 13  | 11  | GTACTCCTAC |
| GTACTCCTACA                                                                                                                                           |                       |   |         |         |       |     |     |            |
| UNSB01.fasta                                                                                                                                          | Cele-UNSB01_6:1553970 | 6 | 1553970 | 1554390 | 421   | 18  | 20  | AGGCAGACCT |
| AGGCAGACCTAGCCTACCCT                                                                                                                                  |                       |   |         |         |       |     |     |            |
| UNSB01.fasta                                                                                                                                          | Cele-UNSB01_6:1555230 | 6 | 1555230 | 1555302 | 73    | 5   | 12  | CTAAGCCTAA |
| CTAAGCCAAAGA                                                                                                                                          |                       |   |         |         |       |     |     |            |
| UNSB01.fasta                                                                                                                                          | Cele-UNSB01_6:1569817 | 6 | 1569817 | 1569931 | 115   | 5   | 23  | AAAAAATTTG |
| AAAAAATTTGTTTCGCACTGACC                                                                                                                               |                       |   |         |         |       |     |     |            |
| UNSB01.fasta                                                                                                                                          | Cele-UNSB01_6:1590254 | 6 | 1590254 | 1590338 | 85    | 4   | 21  | TCTGAGCACT |
| TCTGAGCACTGACAAAAATTA                                                                                                                                 |                       |   |         |         |       |     |     |            |
| UNSB01.fasta                                                                                                                                          | Cele-UNSB01_6:1594210 | 6 | 1594210 | 1594900 | 691   | 19  | 30  | ACTACCCAAC |
| ACTACTCAACCGGCTCCGGCAACTAGTCCG                                                                                                                        |                       |   |         |         |       |     |     |            |
| UNSB01.fasta                                                                                                                                          | Cele-UNSB01_6:1595379 | 6 | 1595379 | 1595859 | 481   | 5   | 108 | ATCCTCAACA |
| ATCCTCAACACCATCAGCGTCATCTAGTTCTCTCCGGA                                                                                                                |                       |   |         |         |       |     |     |            |
| CTATGTCCACAAATTCGGGATCAACTGGTTCTACAGTTACTGTTGCACCAGTATCGTCTAGTACATTTGG                                                                                |                       |   |         |         |       |     |     |            |
| UNSB01.fasta                                                                                                                                          | Cele-UNSB01_6:1598138 | 6 | 1598138 | 1600934 | 2797  | 10  | 249 | CTGGAAGCAC |
| CTGGAAGCACTGTAACCATGGGATCATCAAGCACTTCCGGTGTTTCCACATCTTCAGCATCCAGTACTCAGCCTCAGATGAGCACTTCACAAGGAAGTTCAGCAGGATCCACAGTTGCTTCTTCAACAGCTAGCCCTGCTGCGAGTTCC |                       |   |         |         |       |     |     |            |
| ACAGCTCCATCTTCAACTGGA                                                                                                                                 |                       |   |         |         |       |     |     |            |
| ACTATGAGTCCACTTCTAGTGGAAACAGTTGGATCTACAATTTCTGAATCATCGACAACAGCATCTGCAAGTTCTCAGA                                                                       |                       |   |         |         |       |     |     |            |
| UNSB01.fasta                                                                                                                                          | Cele-UNSB01_6:1657466 | 6 | 1657466 | 1657754 | 289   | 10  | 11  | GTACTGTAGG |
| GTACTGTAGTA                                                                                                                                           |                       |   |         |         |       |     |     |            |
| UNSB01.fasta                                                                                                                                          | Cele-UNSB01_6:1682621 | 6 | 1682621 | 1693139 | 10519 | 404 | 26  | AACGGTCAGA |
| AACGGTCAGAGTCACTATTTTGGTG                                                                                                                             |                       |   |         |         |       |     |     |            |
| UNSB01.fasta                                                                                                                                          | Cele-UNSB01_6:1697161 | 6 | 1697161 | 1700255 | 3095  | 119 | 26  | GACTCTAACC |
| GACTCTAACCATTCACCTAAAAATAT                                                                                                                            |                       |   |         |         |       |     |     |            |
| UNSB01.fasta                                                                                                                                          | Cele-UNSB01_6:1700308 | 6 | 1700308 | 1706287 | 5980  | 323 | 11  | GGAGCGGTTT |
| GGAGCGGTTTG                                                                                                                                           |                       |   |         |         |       |     |     |            |
| UNSB01.fasta                                                                                                                                          | Cele-UNSB01_6:1706298 | 6 | 1706298 | 1706662 | 365   | 14  | 26  | GCCGCAATGC |
| GCCGCAATGCCATTTTTCTGAAATCC                                                                                                                            |                       |   |         |         |       |     |     |            |
| UNSB01.fasta                                                                                                                                          | Cele-UNSB01_6:1780465 | 6 | 1780465 | 1781641 | 1177  | 4   | 165 | CTTTTCCAAA |
| CTTTTCCAAATGGCAATTTTTGATGAAAAAATCCGAATTTTCACAAATTTCAAAAAATTTTTAAACTTTATAATTTTAGCTTTGAATATATCCAAATGGAAGTGCATAACCTATCAATTTGATATATAAACTCGTGCCTACCTTCA    |                       |   |         |         |       |     |     |            |
| GGCATTCAGTTTTTCA                                                                                                                                      |                       |   |         |         |       |     |     |            |
| UNSB01.fasta                                                                                                                                          | Cele-UNSB01_6:1814276 | 6 | 1814276 | 1830201 | 15926 | 595 | 27  | TTACTCTCTG |
| TTACTCTCTGTGGCTTCCCACCATATT                                                                                                                           |                       |   |         |         |       |     |     |            |
| UNSB01.fasta                                                                                                                                          | Cele-UNSB01_6:1911366 | 6 | 1911366 | 1912554 | 1189  | 59  | 18  | AAGCCTATGC |
| AAGCCTATGCCGAAGCCG                                                                                                                                    |                       |   |         |         |       |     |     |            |
| UNSB01.fasta                                                                                                                                          | Cele-UNSB01_6:1926117 | 6 | 1926117 | 1926284 | 168   | 11  | 14  | TAGGCCCTCA |
| TAGGCCCTCAAGCG                                                                                                                                        |                       |   |         |         |       |     |     |            |
| UNSB01.fasta                                                                                                                                          | Cele-UNSB01_6:1991346 | 6 | 1991346 | 1991764 | 419   | 14  | 22  | CCGGCGTGGT |
| CCGGCGTGGTTGAAGCCGACA                                                                                                                                 |                       |   |         |         |       |     |     |            |
| UNSB01.fasta                                                                                                                                          | Cele-UNSB01_6:2020674 | 6 | 2020674 | 2021510 | 837   | 42  | 20  | GTTACACGAA |
| GTTACACGAAAAATAGATT                                                                                                                                   |                       |   |         |         |       |     |     |            |
| UNSB01.fasta                                                                                                                                          | Cele-UNSB01_6:2029404 | 6 | 2029404 | 2030161 | 758   | 38  | 20  | ACACGAAAAA |
| ACACGAAAAAATAGATTGTT                                                                                                                                  |                       |   |         |         |       |     |     |            |
| UNSB01.fasta                                                                                                                                          | Cele-UNSB01_6:2038051 | 6 | 2038051 | 2039066 | 1016  | 51  | 20  | GTTACACGAA |
| GTTACACGAAAAATAGATT                                                                                                                                   |                       |   |         |         |       |     |     |            |
| UNSB01.fasta                                                                                                                                          | Cele-UNSB01_6:2065387 | 6 | 2065387 | 2065569 | 183   | 4   | 46  | TGGTAAATTG |
| TGGTAAATTGCTTCCCGGATCACGCACTTTCTTATTTCTTA                                                                                                             |                       |   |         |         |       |     |     |            |
| CTAACTA                                                                                                                                               |                       |   |         |         |       |     |     |            |
| UNSB01.fasta                                                                                                                                          | Cele-UNSB01_6:2087511 | 6 | 2087511 | 2088871 | 1361  | 34  | 40  | GAATTTTCTC |
| GAATTTTCTCGATTTTCTAGAAAGTTCTGGAA                                                                                                                      |                       |   |         |         |       |     |     |            |
| CATTCCA                                                                                                                                               |                       |   |         |         |       |     |     |            |
| UNSB01.fasta                                                                                                                                          | Cele-UNSB01_6:2088902 | 6 | 2088902 | 2090459 | 1558  | 79  | 15  | CCACGATGGG |
| CCACGATGGGTCTCA                                                                                                                                       |                       |   |         |         |       |     |     |            |
| UNSB01.fasta                                                                                                                                          | Cele-UNSB01_6:2088902 | 6 | 2088902 | 2090835 | 1934  | 85  | 15  | CCACGATGGG |
| CCACGATGGGTCTCA                                                                                                                                       |                       |   |         |         |       |     |     |            |
| UNSB01.fasta                                                                                                                                          | Cele-UNSB01_6:2091376 | 6 | 2091376 | 2093692 | 2317  | 86  | 25  | TTAGAGTAAA |
| TTAGAGTAAATATTTGGCAGA                                                                                                                                 |                       |   |         |         |       |     |     |            |
| ACG                                                                                                                                                   |                       |   |         |         |       |     |     |            |

|                                                 |                       |   |         |         |      |     |    |            |
|-------------------------------------------------|-----------------------|---|---------|---------|------|-----|----|------------|
| UNSB01.fasta                                    | Cele-UNSB01_6:2093711 | 6 | 2093711 | 2093945 | 235  | 9   | 26 | ATAGTGACTC |
| ATAGTGACTCTGGCCGTTCTCCAAAA                      |                       |   |         |         |      |     |    |            |
| UNSB01.fasta                                    | Cele-UNSB01_6:2093985 | 6 | 2093985 | 2094613 | 629  | 30  | 19 | TAATATTTAT |
| TAATATTTATTTATTTAAC                             |                       |   |         |         |      |     |    |            |
| UNSB01.fasta                                    | Cele-UNSB01_6:2094704 | 6 | 2094704 | 2095024 | 321  | 8   | 40 | TTCCAGAATT |
| TTCCAGAATTTTCTCGATTTTCTAGAAAGTTCTGGAACA         |                       |   |         |         |      |     |    |            |
| UNSB01.fasta                                    | Cele-UNSB01_6:2095079 | 6 | 2095079 | 2095359 | 281  | 7   | 35 | CAGAAAATTT |
| CAGAAAATTTAAATTTCCCGCCAAAATATTTTCT              |                       |   |         |         |      |     |    |            |
| UNSB01.fasta                                    | Cele-UNSB01_6:2094705 | 6 | 2094705 | 2095572 | 868  | 10  | 40 | TCCAGAATTT |
| TCCAGAATTTTCTCGATTTTCTAGAAAGTTCTGGAACAT         |                       |   |         |         |      |     |    |            |
| UNSB01.fasta                                    | Cele-UNSB01_6:2095085 | 6 | 2095085 | 2096434 | 1350 | 17  | 35 | ATTTAAATTT |
| ATTTAAATTTCCCGCCAAAATATTTTCTCAGAAA              |                       |   |         |         |      |     |    |            |
| UNSB01.fasta                                    | Cele-UNSB01_6:2097795 | 6 | 2097795 | 2102366 | 4572 | 207 | 19 | AATTAATATT |
| AATTAATATTTATTTATTT                             |                       |   |         |         |      |     |    |            |
| UNSB01.fasta                                    | Cele-UNSB01_6:2097795 | 6 | 2097795 | 2102461 | 4667 | 212 | 19 | AATTAATATT |
| AATTAATATTTATTTATTT                             |                       |   |         |         |      |     |    |            |
| UNSB01.fasta                                    | Cele-UNSB01_6:2109492 | 6 | 2109492 | 2110453 | 962  | 78  | 12 | AATAAATAAT |
| AATAAATAAATA                                    |                       |   |         |         |      |     |    |            |
| UNSB01.fasta                                    | Cele-UNSB01_6:2154760 | 6 | 2154760 | 2154935 | 176  | 7   | 25 | TATATTTTAC |
| TATATTTTACTCTCTGGCATCACAC                       |                       |   |         |         |      |     |    |            |
| UNSB01.fasta                                    | Cele-UNSB01_6:2156238 | 6 | 2156238 | 2156563 | 326  | 12  | 25 | TCTGGCTTCA |
| TCTGGCTTCACAGTAAATTTACTA                        |                       |   |         |         |      |     |    |            |
| UNSB01.fasta                                    | Cele-UNSB01_6:2157154 | 6 | 2157154 | 2162472 | 5319 | 133 | 40 | AAGTTCTGGA |
| AAGTTCTGGAACATTCCAGAATTTTCTCGATTTTCTAGA         |                       |   |         |         |      |     |    |            |
| UNSB01.fasta                                    | Cele-UNSB01_6:2157131 | 6 | 2157131 | 2163386 | 6256 | 140 | 40 | AGAATTTTCT |
| AGAATTTTCTCGATATTTCTAGAAAGTTCTGGAACATTCC        |                       |   |         |         |      |     |    |            |
| UNSB01.fasta                                    | Cele-UNSB01_6:2369427 | 6 | 2369427 | 2369729 | 303  | 24  | 11 | CCATACCTAT |
| CCATACCTATA                                     |                       |   |         |         |      |     |    |            |
| UNSB01.fasta                                    | Cele-UNSB01_6:2413161 | 6 | 2413161 | 2413272 | 112  | 4   | 32 | CGACCTGCGA |
| CGACCTGCGACCTAGCGACCTAGGTCGCTTTG                |                       |   |         |         |      |     |    |            |
| UNSB01.fasta                                    | Cele-UNSB01_6:2485227 | 6 | 2485227 | 2486657 | 1431 | 55  | 26 | TTTTAGTGAA |
| TTTTAGTGAAGTCCAGAGTCACTAA                       |                       |   |         |         |      |     |    |            |
| UNSB01.fasta                                    | Cele-UNSB01_6:2669709 | 6 | 2669709 | 2669769 | 61   | 5   | 12 | AGGCTTAGGC |
| AGGCTTAGGCTT                                    |                       |   |         |         |      |     |    |            |
| UNSB01.fasta                                    | Cele-UNSB01_6:3096507 | 6 | 3096507 | 3096571 | 65   | 4   | 16 | AGAGAGTATA |
| AGAGAGTATAGATTAG                                |                       |   |         |         |      |     |    |            |
| UNSB01.fasta                                    | Cele-UNSB01_6:3098438 | 6 | 3098438 | 3098774 | 337  | 7   | 48 | AAGATGAGGA |
| AAGATGAGGAATTTATTTTGTGATTGCCCCGTAATTTATATTTTCTG |                       |   |         |         |      |     |    |            |
| UNSB01.fasta                                    | Cele-UNSB01_6:3115311 | 6 | 3115311 | 3123060 | 7750 | 398 | 19 | AATCTATTTT |
| AATCTATTTTTCGTGTAAC                             |                       |   |         |         |      |     |    |            |
| UNSB01.fasta                                    | Cele-UNSB01_6:3190243 | 6 | 3190243 | 3190348 | 106  | 7   | 15 | TCACCACGAT |
| TCACCACGATTGGTC                                 |                       |   |         |         |      |     |    |            |
| UNSB01.fasta                                    | Cele-UNSB01_6:3377659 | 6 | 3377659 | 3377780 | 122  | 11  | 11 | AAAATGTGCT |
| AAAATGTGCTA                                     |                       |   |         |         |      |     |    |            |
| UNSB01.fasta                                    | Cele-UNSB01_6:3455223 | 6 | 3455223 | 3455778 | 556  | 27  | 18 | TTTTGTCAGT |
| TTTTGTCAGTTCAATAGT                              |                       |   |         |         |      |     |    |            |
| UNSB01.fasta                                    | Cele-UNSB01_6:3463610 | 6 | 3463610 | 3463814 | 205  | 10  | 17 | TTTTAACGTG |
| TTTTAACGTGACCTAGG                               |                       |   |         |         |      |     |    |            |
| UNSB01.fasta                                    | Cele-UNSB01_6:3482169 | 6 | 3482169 | 3482345 | 177  | 12  | 11 | TAGCTCAGCT |
| TAGCTCAGCTT                                     |                       |   |         |         |      |     |    |            |
| UNSB01.fasta                                    | Cele-UNSB01_6:3508288 | 6 | 3508288 | 3508508 | 221  | 10  | 18 | TTGTCAGTGC |
| TTGTCAGTGCATATTTT                               |                       |   |         |         |      |     |    |            |
| UNSB01.fasta                                    | Cele-UNSB01_6:3747622 | 6 | 3747622 | 3752392 | 4771 | 406 | 11 | CAGTTGTCAC |
| CAGTTGTCACT                                     |                       |   |         |         |      |     |    |            |
| UNSB01.fasta                                    | Cele-UNSB01_6:3814487 | 6 | 3814487 | 3814588 | 102  | 5   | 20 | TTTGGTCAGT |
| TTTGGTCAGTGCTTTTCGAC                            |                       |   |         |         |      |     |    |            |
| UNSB01.fasta                                    | Cele-UNSB01_6:3834410 | 6 | 3834410 | 3834530 | 121  | 5   | 20 | CCATGTAGCT |
| CAATGTAGCTACATAGTTTC                            |                       |   |         |         |      |     |    |            |

|                                                                                                                                                      |                       |   |         |         |       |      |     |             |
|------------------------------------------------------------------------------------------------------------------------------------------------------|-----------------------|---|---------|---------|-------|------|-----|-------------|
| UNSB01.fasta                                                                                                                                         | Cele-UNSB01_6:4047987 | 6 | 4047987 | 4048126 | 140   | 7    | 20  | AAAATAGATT  |
| AAAATAGATTGACATACCAG                                                                                                                                 |                       |   |         |         |       |      |     |             |
| UNSB01.fasta                                                                                                                                         | Cele-UNSB01_6:4149433 | 6 | 4149433 | 4175058 | 25626 | 1025 | 25  | AATGTTCTGCG |
| AATGTTCTGCGCAATTTATTTACTCC                                                                                                                           |                       |   |         |         |       |      |     |             |
| UNSB01.fasta                                                                                                                                         | Cele-UNSB01_6:4175079 | 6 | 4175079 | 4227144 | 52066 | 2000 | 20  | CTATATCGTA  |
| CTATATCGTATCGTAAATAG                                                                                                                                 |                       |   |         |         |       |      |     |             |
| UNSB01.fasta                                                                                                                                         | Cele-UNSB01_6:4456017 | 6 | 4456017 | 4456156 | 140   | 7    | 20  | ACAGACGAAA  |
| ACAGACGAAAAATAGATTA                                                                                                                                  |                       |   |         |         |       |      |     |             |
| UNSB01.fasta                                                                                                                                         | Cele-UNSB01_6:5238384 | 6 | 5238384 | 5284176 | 45793 | 1482 | 27  | TGTGGCTTCC  |
| TGTGGCTTCCCACTATATTTTACTCTC                                                                                                                          |                       |   |         |         |       |      |     |             |
| UNSB01.fasta                                                                                                                                         | Cele-UNSB01_6:5352204 | 6 | 5352204 | 5352282 | 79    | 6    | 13  | GCCATAGGCG  |
| GCCATAGGCGTAA                                                                                                                                        |                       |   |         |         |       |      |     |             |
| UNSB01.fasta                                                                                                                                         | Cele-UNSB01_6:5454734 | 6 | 5454734 | 5454854 | 121   | 8    | 15  | TGGTGAGACC  |
| TGGTGAGACCCATCC                                                                                                                                      |                       |   |         |         |       |      |     |             |
| UNSB01.fasta                                                                                                                                         | Cele-UNSB01_6:5456252 | 6 | 5456252 | 5456359 | 108   | 5    | 23  | AATAAATATT  |
| AATAAATATTAATTAATTAATG                                                                                                                               |                       |   |         |         |       |      |     |             |
| UNSB01.fasta                                                                                                                                         | Cele-UNSB01_6:5456777 | 6 | 5456777 | 5457242 | 466   | 31   | 15  | CCACGATGGG  |
| CCACGATGGTCTCA                                                                                                                                       |                       |   |         |         |       |      |     |             |
| UNSB01.fasta                                                                                                                                         | Cele-UNSB01_6:5457466 | 6 | 5457466 | 5457723 | 258   | 10   | 11  | CTACAGTACT  |
| CTACAGTACTA                                                                                                                                          |                       |   |         |         |       |      |     |             |
| UNSB01.fasta                                                                                                                                         | Cele-UNSB01_6:5769379 | 6 | 5769379 | 5769561 | 183   | 7    | 26  | TAGTGACTCT  |
| TAGTGACTCTGGCCGTTACCATAAA                                                                                                                            |                       |   |         |         |       |      |     |             |
| UNSB01.fasta                                                                                                                                         | Cele-UNSB01_6:6133294 | 6 | 6133294 | 6134199 | 906   | 4    | 226 | CAAGAAGCTT  |
| CAAGAAGCTTCACGTAGTTACAGAAATAGTACATTTTCAGAGCTACCTTTTAGCGCGTATTTTATTATTTAATGAAACTACCATTATAGGCAAAAATAGATAAATTTTCGAAACTTTGAAAATTCTATAATCTCTTCAATGTAACCTT |                       |   |         |         |       |      |     |             |
| TTTTTGAAATGTCTTTCAGAACTTTGTAGTAAATTTAAGCTCTTTTAGAATATACCAACAATACTCCAGTAGGTG                                                                          |                       |   |         |         |       |      |     |             |
| UNSB01.fasta                                                                                                                                         | Cele-UNSB01_6:6135861 | 6 | 6135861 | 6144415 | 8555  | 329  | 26  | TTCTAAATTT  |
| TTCTAAATTTGAAAATTCATCTACCG                                                                                                                           |                       |   |         |         |       |      |     |             |
| UNSB01.fasta                                                                                                                                         | Cele-UNSB01_6:6343035 | 6 | 6343035 | 6343121 | 87    | 5    | 17  | TAATTACTGG  |
| TAATTACTGGAATAAAA                                                                                                                                    |                       |   |         |         |       |      |     |             |
| UNSB01.fasta                                                                                                                                         | Cele-UNSB01_6:6441827 | 6 | 6441827 | 6441956 | 130   | 8    | 16  | GCACTGACAA  |
| GCACTGACAATTTTTTA                                                                                                                                    |                       |   |         |         |       |      |     |             |
| UNSB01.fasta                                                                                                                                         | Cele-UNSB01_6:6516089 | 6 | 6516089 | 6517558 | 1470  | 50   | 19  | GTCAGTGCAA  |
| GTCAGTGCAACTGCAACTG                                                                                                                                  |                       |   |         |         |       |      |     |             |
| UNSB01.fasta                                                                                                                                         | Cele-UNSB01_6:7055357 | 6 | 7055357 | 7058647 | 3291  | 35   | 94  | TGCCTTCAGA  |
| TGCCTTCAGAAATTGACAATTTTCCATTGATTGTCTACAAAGGGCATCGAAAAGCACCCAATATTTAGAGAACAGAAGATTTTGAGAATTAC                                                         |                       |   |         |         |       |      |     |             |
| UNSB01.fasta                                                                                                                                         | Cele-UNSB01_6:7306204 | 6 | 7306204 | 7313772 | 7569  | 373  | 20  | ATAGCTATGT  |
| ATAGCTATGTCTGATCATAA                                                                                                                                 |                       |   |         |         |       |      |     |             |
| UNSB01.fasta                                                                                                                                         | Cele-UNSB01_6:7315610 | 6 | 7315610 | 7315788 | 179   | 9    | 20  | TTTTTCGTCT  |
| TTTTTCGTCTGTCAATCTAT                                                                                                                                 |                       |   |         |         |       |      |     |             |
| UNSB01.fasta                                                                                                                                         | Cele-UNSB01_6:7586233 | 6 | 7586233 | 7592821 | 6589  | 165  | 40  | TTACCCTTAA  |
| TTACCCTTAAATGGGCGCCGGTTTCGCTTTGAGCGATTCC                                                                                                             |                       |   |         |         |       |      |     |             |
| UNSB01.fasta                                                                                                                                         | Cele-UNSB01_6:7806159 | 6 | 7806159 | 7806450 | 292   | 5    | 18  | TAGTCTTGCA  |
| TAGTCTTGCACTCTCTAA                                                                                                                                   |                       |   |         |         |       |      |     |             |
| UNSB01.fasta                                                                                                                                         | Cele-UNSB01_6:7918402 | 6 | 7918402 | 7918617 | 216   | 6    | 12  | TCTTCCTCCT  |
| TCTTCTCCTCC                                                                                                                                          |                       |   |         |         |       |      |     |             |
| UNSB01.fasta                                                                                                                                         | Cele-UNSB01_6:8111999 | 6 | 8111999 | 8112167 | 169   | 7    | 24  | GGTGGCTGGT  |
| GGTGGCTGGTCACAAAAGTAAGTT                                                                                                                             |                       |   |         |         |       |      |     |             |
| UNSB01.fasta                                                                                                                                         | Cele-UNSB01_6:8127661 | 6 | 8127661 | 8127776 | 116   | 6    | 19  | CAGACGAAAA  |
| CAGACGAAAAATATATTGG                                                                                                                                  |                       |   |         |         |       |      |     |             |
| UNSB01.fasta                                                                                                                                         | Cele-UNSB01_6:8150139 | 6 | 8150139 | 8150195 | 57    | 4    | 14  | TTACCAAAAT  |
| TTACCAAAATCTAG                                                                                                                                       |                       |   |         |         |       |      |     |             |
| UNSB01.fasta                                                                                                                                         | Cele-UNSB01_6:8414337 | 6 | 8414337 | 8415392 | 1056  | 85   | 11  | GAGCGGTTTT  |
| GAGCGGTCTTG                                                                                                                                          |                       |   |         |         |       |      |     |             |
| UNSB01.fasta                                                                                                                                         | Cele-UNSB01_6:8836090 | 6 | 8836090 | 8836155 | 66    | 5    | 11  | GCAAAAAATG  |
| GCAAAAAATGT                                                                                                                                          |                       |   |         |         |       |      |     |             |
| UNSB01.fasta                                                                                                                                         | Cele-UNSB01_6:8885720 | 6 | 8885720 | 8885804 | 85    | 5    | 17  | AGGGGGCATC  |
| AGGGGGCATTAGGTCAA                                                                                                                                    |                       |   |         |         |       |      |     |             |
| UNSB01.fasta                                                                                                                                         | Cele-UNSB01_6:8886112 | 6 | 8886112 | 8886213 | 102   | 6    | 17  | GATGCCCCCT  |
| GATGCCCCCTCTGAACG                                                                                                                                    |                       |   |         |         |       |      |     |             |

|                                                                                                                                                       |                        |   |          |          |       |     |     |             |
|-------------------------------------------------------------------------------------------------------------------------------------------------------|------------------------|---|----------|----------|-------|-----|-----|-------------|
| UNSB01.fasta                                                                                                                                          | Cele-UNSB01_6:9243247  | 6 | 9243247  | 9243516  | 270   | 10  | 11  | GTACTGTAGG  |
| GTACTGTAGTA                                                                                                                                           |                        |   |          |          |       |     |     |             |
| UNSB01.fasta                                                                                                                                          | Cele-UNSB01_6:9243610  | 6 | 9243610  | 9244090  | 481   | 12  | 40  | CTTCTGGAAA  |
| CTTCTGGAAAAATCCGAGAAAATTCTGGAATGTTCCAGAAC                                                                                                             |                        |   |          |          |       |     |     |             |
| UNSB01.fasta                                                                                                                                          | Cele-UNSB01_6:9244298  | 6 | 9244298  | 9244938  | 641   | 20  | 32  | CGGGAATTCA  |
| CGGGAATTCAAATTTCTGTGAAAAATTTTAG                                                                                                                       |                        |   |          |          |       |     |     |             |
| UNSB01.fasta                                                                                                                                          | Cele-UNSB01_6:9421607  | 6 | 9421607  | 9443178  | 21572 | 857 | 25  | AGAGAGTAAA  |
| AGAGAGTAACTATACTGTGAAGCC                                                                                                                              |                        |   |          |          |       |     |     |             |
| UNSB01.fasta                                                                                                                                          | Cele-UNSB01_6:9443244  | 6 | 9443244  | 9443487  | 244   | 7   | 35  | AAAAATTTGAA |
| AAAAATTTGAATTTCCCGCCAAAATTTTTTCACGTG                                                                                                                  |                        |   |          |          |       |     |     |             |
| UNSB01.fasta                                                                                                                                          | Cele-UNSB01_6:9866116  | 6 | 9866116  | 9867908  | 1793  | 48  | 32  | TCCCGCCAAA  |
| TCACGCCAAAAATTTTCAAAGAAAAATTTGAAT                                                                                                                     |                        |   |          |          |       |     |     |             |
| UNSB01.fasta                                                                                                                                          | Cele-UNSB01_6:9867922  | 6 | 9867922  | 9867997  | 76    | 5   | 15  | ATGGGTCTCG  |
| ATGGGTCTCGCCACG                                                                                                                                       |                        |   |          |          |       |     |     |             |
| UNSB01.fasta                                                                                                                                          | Cele-UNSB01_6:10621309 | 6 | 10621309 | 10621525 | 217   | 4   | 25  | ATTGGCAGAA  |
| ATTGGCAGAACATTAGAGTAAATAT                                                                                                                             |                        |   |          |          |       |     |     |             |
| UNSB01.fasta                                                                                                                                          | Cele-UNSB01_6:10621572 | 6 | 10621572 | 10641051 | 19480 | 772 | 25  | CAGAGAGTAA  |
| CAGAGAGTAAAAATATATGGTGAAGC                                                                                                                            |                        |   |          |          |       |     |     |             |
| UNSB01.fasta                                                                                                                                          | Cele-UNSB01_6:10641130 | 6 | 10641130 | 10642329 | 1200  | 107 | 11  | TGGAGCGGTT  |
| TGGAGCGGTAT                                                                                                                                           |                        |   |          |          |       |     |     |             |
| UNSB01.fasta                                                                                                                                          | Cele-UNSB01_6:11021354 | 6 | 11021354 | 11026794 | 5441  | 27  | 214 | AAAACCTACA  |
| AAAACCTACAGTAACTTTGTGCGTATTTTATTATTAAATGAAAACGACCATTATAGGCAAAATAGGTAAATTTATGAAACTTTGAAAACTCCCAATCACTTCAAACCAACTTTTTTTGAAAATCTTTTCAGAACTTTGTTGCAAAT    |                        |   |          |          |       |     |     |             |
| TCCAAGCTTTTTTCAGAAGTTACCAACAACATCCCGAGTAGGTGCCAGAAGCTCCGAGCAGTTACAG                                                                                   |                        |   |          |          |       |     |     |             |
| UNSB01.fasta                                                                                                                                          | Cele-UNSB01_6:11249167 | 6 | 11249167 | 11249852 | 686   | 21  | 27  | CACTGACCAA  |
| CACTGGCCAAAGAAAAAATTACACGTG                                                                                                                           |                        |   |          |          |       |     |     |             |
| UNSB01.fasta                                                                                                                                          | Cele-UNSB01_6:11535780 | 6 | 11535780 | 11535884 | 105   | 4   | 26  | AAATTAATCT  |
| AAATTAATCTGTCGTCTCTAACTTGTT                                                                                                                           |                        |   |          |          |       |     |     |             |
| UNSB01.fasta                                                                                                                                          | Cele-UNSB01_6:11722389 | 6 | 11722389 | 11722452 | 64    | 4   | 14  | CTATACGCTA  |
| CTATACGCTACACG                                                                                                                                        |                        |   |          |          |       |     |     |             |
| UNSB01.fasta                                                                                                                                          | Cele-UNSB01_6:11722486 | 6 | 11722486 | 11725761 | 3276  | 130 | 25  | CTGCCGTAAT  |
| CTGCCGTAATGCCAATTTATAGAAT                                                                                                                             |                        |   |          |          |       |     |     |             |
| UNSB01.fasta                                                                                                                                          | Cele-UNSB01_6:11725790 | 6 | 11725790 | 11730325 | 4536  | 175 | 26  | CGGCGGATTT  |
| CGGCGGATTTTAGAAAAATGGCATTG                                                                                                                            |                        |   |          |          |       |     |     |             |
| UNSB01.fasta                                                                                                                                          | Cele-UNSB01_6:11775904 | 6 | 11775904 | 11776150 | 247   | 7   | 11  | TCCTACAGTA  |
| TCCTACCGTAA                                                                                                                                           |                        |   |          |          |       |     |     |             |
| UNSB01.fasta                                                                                                                                          | Cele-UNSB01_6:11975065 | 6 | 11975065 | 11975494 | 430   | 4   | 108 | TTTCACGTTT  |
| TTTCACGTTTTTCAGGTGATTATATAGGTCACGAACTAATTTATTTTGAAAATTGACCTGTGGACCTATAACTTTGGAGATATGGTAAATTGAGTATGGGCTTTTAGAT                                         |                        |   |          |          |       |     |     |             |
| UNSB01.fasta                                                                                                                                          | Cele-UNSB01_6:12031687 | 6 | 12031687 | 12031907 | 221   | 10  | 22  | TCAGTGCAAA  |
| TCAGTGCAAAAGTGACAATTATG                                                                                                                               |                        |   |          |          |       |     |     |             |
| UNSB01.fasta                                                                                                                                          | Cele-UNSB01_6:12072301 | 6 | 12072301 | 12080487 | 8187  | 312 | 26  | ATGACTCTAA  |
| ATGACTCTAACCATTACCTAAAAATA                                                                                                                            |                        |   |          |          |       |     |     |             |
| UNSB01.fasta                                                                                                                                          | Cele-UNSB01_6:12080509 | 6 | 12080509 | 12089472 | 8964  | 344 | 26  | AAGTTAGACC  |
| AAGTTAGACCATTAGATGAATTTCTA                                                                                                                            |                        |   |          |          |       |     |     |             |
| UNSB01.fasta                                                                                                                                          | Cele-UNSB01_6:12089493 | 6 | 12089493 | 12089669 | 177   | 16  | 11  | CGAAGTTGTC  |
| CAAAGTTGTCA                                                                                                                                           |                        |   |          |          |       |     |     |             |
| UNSB01.fasta                                                                                                                                          | Cele-UNSB01_6:12159416 | 6 | 12159416 | 12159737 | 322   | 5   | 18  | TGCAATACTA  |
| TGCAATACTAATAGGGAG                                                                                                                                    |                        |   |          |          |       |     |     |             |
| UNSB01.fasta                                                                                                                                          | Cele-UNSB01_6:12186349 | 6 | 12186349 | 12201499 | 15151 | 591 | 25  | CTCTCTGGCT  |
| CTCTCTGGCTTCCCACTATATTTTA                                                                                                                             |                        |   |          |          |       |     |     |             |
| UNSB01.fasta                                                                                                                                          | Cele-UNSB01_6:12201539 | 6 | 12201539 | 12202895 | 1357  | 6   | 226 | TGTACTATTT  |
| TGTACTATTTCTGTAACACGTGAAGCTTCTTGTAACCTACTGAAATATTGTTGGTATATTCTAAAAGAGCTTGAAATTTACTACAAAGTTTCTGAAAGACATTTCAAAAAAGTTACTTTGAAGAGATTTATGAATTTTCAAACCTTACG |                        |   |          |          |       |     |     |             |
| AAAATTCGTCATTTTTTGCCTATAAATGGTAGTTTTTCATTAAATAATAAAATACGCATTATAAGGTAGGGCTGAAAA                                                                        |                        |   |          |          | </    |     |     |             |

|                                                                                                                                                   |                        |   |          |          |       |     |     |             |
|---------------------------------------------------------------------------------------------------------------------------------------------------|------------------------|---|----------|----------|-------|-----|-----|-------------|
| UNSB01.fasta                                                                                                                                      | Cele-UNSB01_6:12591003 | 6 | 12591003 | 12604866 | 13864 | 415 | 32  | GGTGTCTATTT |
| GGTGTCTATTTGGTGTCCATCGGTGTTAAAGT                                                                                                                  |                        |   |          |          |       |     |     |             |
| UNSB01.fasta                                                                                                                                      | Cele-UNSB01_6:12827464 | 6 | 12827464 | 12828819 | 1356  | 70  | 19  | AAAAATAGAT  |
| AAAAATAGATTGTTACACG                                                                                                                               |                        |   |          |          |       |     |     |             |
| UNSB01.fasta                                                                                                                                      | Cele-UNSB01_6:12847168 | 6 | 12847168 | 12848031 | 864   | 10  | 15  | GGGTCTCACC  |
| GGGTCTCACCGCGAA                                                                                                                                   |                        |   |          |          |       |     |     |             |
| UNSB01.fasta                                                                                                                                      | Cele-UNSB01_6:12904034 | 6 | 12904034 | 12904836 | 803   | 12  | 32  | CGACCTAGGT  |
| CGACCTAGGTCGCATTGCGACCTGCGACCTAG                                                                                                                  |                        |   |          |          |       |     |     |             |
| UNSB01.fasta                                                                                                                                      | Cele-UNSB01_6:12932636 | 6 | 12932636 | 12932914 | 279   | 9   | 31  | TCGACAGAAG  |
| TCGACAGAAGCTGTGCGATCTATTATCTTCC                                                                                                                   |                        |   |          |          |       |     |     |             |
| UNSB01.fasta                                                                                                                                      | Cele-UNSB01_6:12933662 | 6 | 12933662 | 12933969 | 308   | 5   | 26  | AAAAATGGCA  |
| AAAAATGGCATTGCGGCGGATTTTCTAG                                                                                                                      |                        |   |          |          |       |     |     |             |
| UNSB01.fasta                                                                                                                                      | Cele-UNSB01_6:13568461 | 6 | 13568461 | 13570473 | 2013  | 18  | 108 | TTTCAGATTT  |
| TTTCAGATTTTCAGATTTTCACTTGATTATATAGGTCACGACCCAAGTTATTTTGAAATTGAGCTACACGGCTGTAACCTTTGGAGCTATGGGTAATCAAGTATGAGC                                      |                        |   |          |          |       |     |     |             |
| UNSB01.fasta                                                                                                                                      | Cele-UNSB01_6:13750177 | 6 | 13750177 | 13750509 | 333   | 8   | 18  | TGCAAGACTA  |
| TGCAAGACTATTAAAGGC                                                                                                                                |                        |   |          |          |       |     |     |             |
| UNSB01.fasta                                                                                                                                      | Cele-UNSB01_6:13887397 | 6 | 13887397 | 13887577 | 181   | 11  | 15  | TCGTGGTGAG  |
| TCGTGGTGAGACCCCT                                                                                                                                  |                        |   |          |          |       |     |     |             |
| UNSB01.fasta                                                                                                                                      | Cele-UNSB01_6:14010915 | 6 | 14010915 | 14011665 | 751   | 7   | 108 | TGGGTAATCA  |
| TGGGTAATCAGGTGCGAGCTTTTACGATTTTACGTTTTCACGTGAATATCTAGGTCACGAACCAATTTCTTTTCGGAATGGGACTAGGGACATGAACTTTTGGTTTA                                       |                        |   |          |          |       |     |     |             |
| UNSB01.fasta                                                                                                                                      | Cele-UNSB01_6:14101701 | 6 | 14101701 | 14101756 | 56    | 5   | 11  | GTGCTTGGTC  |
| GTGCTTGGTCA                                                                                                                                       |                        |   |          |          |       |     |     |             |
| UNSB01.fasta                                                                                                                                      | Cele-UNSB01_6:14121790 | 6 | 14121790 | 14122309 | 520   | 13  | 40  | GAACATTCCA  |
| GAACATTCCAGAAATTTCCCGATTTTCTAGAAAGTTCTG                                                                                                           |                        |   |          |          |       |     |     |             |
| UNSB01.fasta                                                                                                                                      | Cele-UNSB01_6:14122412 | 6 | 14122412 | 14122622 | 211   | 6   | 35  | CAGAAAATTT  |
| CAGAAAATTTAAATTTCCCGCCAAAATATTTTCA                                                                                                                |                        |   |          |          |       |     |     |             |
| UNSB01.fasta                                                                                                                                      | Cele-UNSB01_6:14122652 | 6 | 14122652 | 14123413 | 762   | 19  | 15  | GGGTCTCACC  |
| GGGTCTCACCACGAC                                                                                                                                   |                        |   |          |          |       |     |     |             |
| UNSB01.fasta                                                                                                                                      | Cele-UNSB01_6:14123669 | 6 | 14123669 | 14124172 | 504   | 19  | 11  | CTACAGTACT  |
| CTACAGTACTA                                                                                                                                       |                        |   |          |          |       |     |     |             |
| UNSB01.fasta                                                                                                                                      | Cele-UNSB01_6:14250466 | 6 | 14250466 | 14251066 | 601   | 4   | 153 | TGAGGTGCAG  |
| TGAGGTGCAGGGCGTGATGAGCTGTGCCATTTCGGAAGTGTGATTCCCGAGCCGTGATTCATAGATGAGTTGGAGGGAGCTGCTGTGGAAGTTGTTTGAATTGAGAGAGTCCATGAGCCATCAAGAAGCTTTCCGGCAGATTGGG |                        |   |          |          |       |     |     |             |
| CAAC                                                                                                                                              |                        |   |          |          |       |     |     |             |
| UNSB01.fasta                                                                                                                                      | Cele-UNSB01_6:14307881 | 6 | 14307881 | 14308131 | 251   | 10  | 25  | TCTCTGGCTT  |
| TCTCTGGCTTCACCGTATATTTTAC                                                                                                                         |                        |   |          |          |       |     |     |             |
| UNSB01.fasta                                                                                                                                      | Cele-UNSB01_6:14447847 | 6 | 14447847 | 14448957 | 1111  | 73  | 15  | TCGTGGTGAG  |
| TCGTGGTGAGAACTT                                                                                                                                   |                        |   |          |          |       |     |     |             |
| UNSB01.fasta                                                                                                                                      | Cele-UNSB01_6:14452976 | 6 | 14452976 | 14453126 | 151   | 12  | 12  | ATAGGCATAG  |
| ATAGGCATAGGC                                                                                                                                      |                        |   |          |          |       |     |     |             |
| UNSB01.fasta                                                                                                                                      | Cele-UNSB01_6:14480301 | 6 | 14480301 | 14480556 | 256   | 13  | 20  | TAACAATCTA  |
| TAACAATCTATTTTTCGTG                                                                                                                               |                        |   |          |          |       |     |     |             |
| UNSB01.fasta                                                                                                                                      | Cele-UNSB01_6:14589132 | 6 | 14589132 | 14589372 | 241   | 5   | 48  | GGAGGTGGAG  |
| GGAGGTGGAGAAAGTGTAGTTCCCGGTGGTCGCGGTTCTTTAGAGGGT                                                                                                  |                        |   |          |          |       |     |     |             |
| UNSB01.fasta                                                                                                                                      | Cele-UNSB01_6:14650166 | 6 | 14650166 | 14651272 | 1107  | 10  | 18  | TGCAAGACTA  |
| TGCAAGACTATTAGAGGC                                                                                                                                |                        |   |          |          |       |     |     |             |
| UNSB01.fasta                                                                                                                                      | Cele-UNSB01_6:14688507 | 6 | 14688507 | 14688582 | 76    | 5   | 15  | TCGTGGCGAG  |
| TCGTGGCGAGACCCCT                                                                                                                                  |                        |   |          |          |       |     |     |             |
| UNSB01.fasta                                                                                                                                      | Cele-UNSB01_6:14688602 | 6 | 14688602 | 14689240 | 639   | 20  | 32  | TTTGGCGGGA  |
| TTCCGGCGGAATTCAAATTTCTGTGAAAATT                                                                                                                   |                        |   |          |          |       |     |     |             |
| UNSB01.fasta                                                                                                                                      | Cele-UNSB01_6:14711854 | 6 | 14711854 | 14734555 | 22702 | 477 | 48  | GGCAAAATCAA |
| GGCAAAATCAAATGAATTCCTCATCTTCAAAAAATATAAATTACG                                                                                                     |                        |   |          |          |       |     |     |             |
| UNSB01.fasta                                                                                                                                      | Cele-UNSB01_6:14983794 | 6 | 14983794 | 14983948 | 155   | 5   | 22  | TTTGTGGGAG  |
| TTTGTGGGAGTGAAGTTACT                                                                                                                              |                        |   |          |          |       |     |     |             |
| UNSB01.fasta                                                                                                                                      | Cele-UNSB01_6:15068529 | 6 | 15068529 | 15068945 | 417   | 13  | 32  | TTGAATTCCC  |
| TTGAATTCCCGCCAAAATTTTTCACAGAAAAAT                                                                                                                 |                        |   |          |          |       |     |     |             |
| UNSB01.fasta                                                                                                                                      | Cele-UNSB01_6:15068534 | 6 | 15068534 | 15069086 | 553   | 16  | 32  | TTCCCGCCAA  |
| TTCCCGCCAAAATTTTTCACAGAAAAATTGAA                                                                                                                  |                        |   |          |          |       |     |     |             |
| UNSB01.fasta                                                                                                                                      | Cele-UNSB01_6:15068455 | 6 | 15068455 | 15069305 | 851   | 5   | 40  | TTCTGGAACA  |
| TTCTGGAACATTCCAGCATTTTCTCAAGTTTTCAGAAGG                                                                                                           |                        |   |          |          |       |     |     |             |

|                                                                                                                                                       |                        |   |          |          |       |     |     |              |
|-------------------------------------------------------------------------------------------------------------------------------------------------------|------------------------|---|----------|----------|-------|-----|-----|--------------|
| UNSB01.fasta                                                                                                                                          | Cele-UNSB01_6:15069428 | 6 | 15069428 | 15069697 | 270   | 10  | 11  | CCTACAGTAC   |
| CTACAGTACAA                                                                                                                                           |                        |   |          |          |       |     |     |              |
| UNSB01.fasta                                                                                                                                          | Cele-UNSB01_6:15253053 | 6 | 15253053 | 15270737 | 17685 | 696 | 25  | TGGCTTCACACA |
| TGGCTTCACACTATATTTTACTCTG                                                                                                                             |                        |   |          |          |       |     |     |              |
| UNSB01.fasta                                                                                                                                          | Cele-UNSB01_6:15298701 | 6 | 15298701 | 15298945 | 245   | 7   | 35  | CAGAAAAATTT  |
| CAGAAAAATTTAAATTTCCCGCCAAAAGGTTTTTTT                                                                                                                  |                        |   |          |          |       |     |     |              |
| UNSB01.fasta                                                                                                                                          | Cele-UNSB01_6:15412985 | 6 | 15412985 | 15413295 | 311   | 5   | 72  | TGGTTGTGTT   |
| TGGTTGTGTTCCCAAAAGTGAGAAAAGAGGGTACAGACCTCTGTACGAATATGTCTTATCAGCTTCAAAAGA                                                                              |                        |   |          |          |       |     |     |              |
| UNSB01.fasta                                                                                                                                          | Cele-UNSB01_6:15588433 | 6 | 15588433 | 15598390 | 9958  | 92  | 108 | AAGTCTTCTT   |
| AAGTCTTCTTGGTTCTGTGTCTTTGCTTCGAAATGTTGACCATCTCCTTGCAGGATCTTGTTGTCAGATGGAACCTTCTTGGCATAACCGTTCTCCACTGATGTGAGTG                                         |                        |   |          |          |       |     |     |              |
| UNSB01.fasta                                                                                                                                          | Cele-UNSB01_6:15665052 | 6 | 15665052 | 15665283 | 232   | 11  | 21  | TGAAAGATTG   |
| TGAAAGATTGGTCAGTGCCTA                                                                                                                                 |                        |   |          |          |       |     |     |              |
| UNSB01.fasta                                                                                                                                          | Cele-UNSB01_6:15839450 | 6 | 15839450 | 15840189 | 740   | 22  | 10  | TATCTAGATC   |
| TATCTATATC                                                                                                                                            |                        |   |          |          |       |     |     |              |
| UNSB01.fasta                                                                                                                                          | Cele-UNSB01_6:15851631 | 6 | 15851631 | 15851806 | 176   | 5   | 35  | ATTTAAATTT   |
| ATTTAAATTTCCCGCCAAAATATTTTTCACAGAAA                                                                                                                   |                        |   |          |          |       |     |     |              |
| UNSB01.fasta                                                                                                                                          | Cele-UNSB01_6:15851847 | 6 | 15851847 | 15853377 | 1531  | 97  | 15  | GTCTCACCAC   |
| GTCTCACCGCAAGG                                                                                                                                        |                        |   |          |          |       |     |     |              |
| UNSB01.fasta                                                                                                                                          | Cele-UNSB01_6:15876707 | 6 | 15876707 | 15876856 | 150   | 4   | 21  | TGTCCGTGAT   |
| TGTCCGTGATGATCGTGAGCA                                                                                                                                 |                        |   |          |          |       |     |     |              |
| UNSB01.fasta                                                                                                                                          | Cele-UNSB01_6:15966442 | 6 | 15966442 | 15966650 | 209   | 8   | 26  | GGTCTAACTT   |
| GGTCTAACTTTATAAATGGATCTGAT                                                                                                                            |                        |   |          |          |       |     |     |              |
| UNSB01.fasta                                                                                                                                          | Cele-UNSB01_6:16004509 | 6 | 16004509 | 16004749 | 241   | 6   | 40  | AAAGTTCTGG   |
| AAAGTTCTGGAACATTCCAGAATTTTCCCGATTTTCTAA                                                                                                               |                        |   |          |          |       |     |     |              |
| UNSB01.fasta                                                                                                                                          | Cele-UNSB01_6:16004822 | 6 | 16004822 | 16005172 | 351   | 10  | 35  | CAGAAAAATTT  |
| CAGAAAAATTTAAATTACCCGCCAAAATATCTTTCA                                                                                                                  |                        |   |          |          |       |     |     |              |
| UNSB01.fasta                                                                                                                                          | Cele-UNSB01_6:16005217 | 6 | 16005217 | 16005457 | 241   | 15  | 15  | GGGTCTCACC   |
| GGGTCTCACCACGAT                                                                                                                                       |                        |   |          |          |       |     |     |              |
| UNSB01.fasta                                                                                                                                          | Cele-UNSB01_6:16057246 | 6 | 16057246 | 16058243 | 998   | 38  | 26  | AATTCATCTA   |
| AATTCATCTAGTGGTCTAACTCTGGA                                                                                                                            |                        |   |          |          |       |     |     |              |
| UNSB01.fasta                                                                                                                                          | Cele-UNSB01_6:16108332 | 6 | 16108332 | 16108500 | 169   | 8   | 21  | GGCTGCCGAG   |
| GGCTGCCGAGGGTAGGCTAGG                                                                                                                                 |                        |   |          |          |       |     |     |              |
| UNSB01.fasta                                                                                                                                          | Cele-UNSB01_6:16177777 | 6 | 16177777 | 16179557 | 1781  | 89  | 20  | CATACCAAAA   |
| CATACCAAAAATAGATTGG                                                                                                                                   |                        |   |          |          |       |     |     |              |
| UNSB01.fasta                                                                                                                                          | Cele-UNSB01_6:16179578 | 6 | 16179578 | 16182464 | 2887  | 111 | 26  | GTGAACGGCC   |
| GTGAAGGGCCAGAGTCACTATTTTGG                                                                                                                            |                        |   |          |          |       |     |     |              |
| UNSB01.fasta                                                                                                                                          | Cele-UNSB01_6:16182513 | 6 | 16182513 | 16182592 | 80    | 4   | 20  | TAACAATCTA   |
| TAACAATCTATTTTTCGTG                                                                                                                                   |                        |   |          |          |       |     |     |              |
| UNSB01.fasta                                                                                                                                          | Cele-UNSB01_6:16300389 | 6 | 16300389 | 16301032 | 644   | 4   | 158 | TATCAATTTT   |
| TATCAATTTTCAGACGCGCTACGGGGGTTTTTGTCTTGAATTTCAATTTCAACAGGCGCAAAAAACAAAAATAAAATTTTTGGATTTTTGGAAAAGTTTTTATAGATTGTATTCTAGATTGTTTAAAAATATTATTGGTACGTTTTT   |                        |   |          |          |       |     |     |              |
| GGACCTATA                                                                                                                                             |                        |   |          |          |       |     |     |              |
| UNSB01.fasta                                                                                                                                          | Cele-UNSB01_6:16300466 | 6 | 16300466 | 16301134 | 669   | 4   | 158 | CAAAAAATAAA  |
| CAAAAAATAAAATTTTGGATTTTTTGGAAAAGTTTTTATAGATTGTATTCTAGATTGTTTAAAAATATTATTGGTACGTTTTTGGACCTATATATCAATTTTCAGACGCGCTACGGGGGTTTTTGTCTTGAATTTCAATTTCAACAGGC |                        |   |          |          |       |     |     |              |
| GCAAAAAAA                                                                                                                                             |                        |   |          |          |       |     |     |              |
| UNSB01.fasta                                                                                                                                          | Cele-UNSB01_6:16421783 | 6 | 16421783 | 16421902 | 120   | 6   | 20  | CCACCCTGTA   |
| CCACCCTGTAATATCATGGA                                                                                                                                  |                        |   |          |          |       |     |     |              |
| UNSB01.fasta                                                                                                                                          | Cele-UNSB01_6:16471702 | 6 | 16471702 | 16471949 | 248   | 8   | 11  | GTACTGTAGG   |
| GTACTGTAGTA                                                                                                                                           |                        |   |          |          |       |     |     |              |
| UNSB01.fasta                                                                                                                                          | Cele-UNSB01_6:16472035 | 6 | 16472035 | 16472475 | 441   | 11  | 40  | TCCAGAACCT   |
| TCCAGAACCTTCTGGAAAATCCGAGAAAATTCTGGAATGT                                                                                                              |                        |   |          |          |       |     |     |              |
| UNSB01.fasta                                                                                                                                          | Cele-UNSB01_6:16472071 | 6 | 16472071 | 16473145 | 1075  | 13  | 40  | ATGTTCCAGA   |
| ATGTTCCAGAACCTTCTGGAAAATTTGAGAAAATGCTGGA                                                                                                              |                        |   |          |          |       |     |     |              |
| UNSB01.fasta                                                                                                                                          | Cele-UNSB01_6:16506358 | 6 | 16506358 | 16506686 | 329   | 5   | 18  | ATTAGTTTTG   |
| ATTAGTTTTGCACTCTCT                                                                                                                                    |                        |   |          |          |       |     |     |              |
| UNSB01.fasta                                                                                                                                          | Cele-UNSB01_6:16529882 | 6 | 16529882 | 16530026 | 145   | 9   | 14  | TACCATATAC   |
| TACCAATACCATA                                                                                                                                         |                        |   |          |          |       |     |     |              |
| UNSB01.fasta                                                                                                                                          | Cele-UNSB01_6:16570815 | 6 | 16570815 | 16570983 | 169   | 12  | 14  | CTTAGGGCTT   |
| CTTAGGGCTTCAGG                                                                                                                                        |                        |   |          |          |       |     |     |              |

|                                                                             |                        |   |          |          |       |     |    |            |
|-----------------------------------------------------------------------------|------------------------|---|----------|----------|-------|-----|----|------------|
| UNSB01.fasta                                                                | Cele-UNSB01_6:16657827 | 6 | 16657827 | 16657967 | 141   | 7   | 20 | TACAGGGTGG |
| TACAGGGTGGCCATAATTA                                                         |                        |   |          |          |       |     |    |            |
| UNSB01.fasta                                                                | Cele-UNSB01_6:16744464 | 6 | 16744464 | 16744698 | 235   | 10  | 16 | TTCCGGCAAT |
| TTCCGGCAATCGGCTA                                                            |                        |   |          |          |       |     |    |            |
| UNSB01.fasta                                                                | Cele-UNSB01_6:16876782 | 6 | 16876782 | 16877097 | 316   | 18  | 15 | TCACCACGAA |
| TCACCACGAAGGGTC                                                             |                        |   |          |          |       |     |    |            |
| UNSB01.fasta                                                                | Cele-UNSB01_6:17130007 | 6 | 17130007 | 17135013 | 5007  | 66  | 76 | AGCATTAGAG |
| AGCATTAGAGCATGTACACAGACACCGACAAACCACAGTCTCTCCCACTTTCCTTCGTGCAAAGGAGTGTCTTCT |                        |   |          |          |       |     |    |            |
| UNSB01.fasta                                                                | Cele-UNSB01_6:17211035 | 6 | 17211035 | 17211529 | 495   | 4   | 52 | GCATGTCTTC |
| GCATGTCTTCCAAGCGTTTTTGAGCCACGCATGGGATTCTCTATACACGGCTG                       |                        |   |          |          |       |     |    |            |
| UNSB01.fasta                                                                | Cele-UNSB01_6:17224721 | 6 | 17224721 | 17225161 | 441   | 13  | 40 | TTTCTAGAAA |
| TTTCTAGAAAATTCTGGACCATTCCAGAACTTTCTCGGAT                                    |                        |   |          |          |       |     |    |            |
| UNSB01.fasta                                                                | Cele-UNSB01_6:17225477 | 6 | 17225477 | 17225567 | 91    | 6   | 15 | GGGTCTCACC |
| GGGTCTCACCACGAT                                                             |                        |   |          |          |       |     |    |            |
| UNSB01.fasta                                                                | Cele-UNSB01_6:17257914 | 6 | 17257914 | 17259280 | 1367  | 37  | 10 | TGGATCGGGA |
| TGGATCGGAA                                                                  |                        |   |          |          |       |     |    |            |
| UNSB01.fasta                                                                | Cele-UNSB01_6:17259878 | 6 | 17259878 | 17260337 | 460   | 20  | 14 | ATAGCGCATA |
| ATAGCGTATAGCGT                                                              |                        |   |          |          |       |     |    |            |
| UNSB01.fasta                                                                | Cele-UNSB01_6:17463543 | 6 | 17463543 | 17463648 | 106   | 5   | 21 | GGTGGACCCA |
| GGTGGATCCAGGGGTTCTCTAG                                                      |                        |   |          |          |       |     |    |            |
| UNSB01.fasta                                                                | Cele-UNSB01_6:17501177 | 6 | 17501177 | 17501366 | 190   | 5   | 38 | CCGTTTCGCC |
| CCGTTTCGCCTTGAGCGATGCACCTTTAAATGGGCCTC                                      |                        |   |          |          |       |     |    |            |
| UNSB01.fasta                                                                | Cele-UNSB01_6:17555071 | 6 | 17555071 | 17555695 | 625   | 16  | 39 | ATTGATACTT |
| ATTGATACTTTGTACAGGTTTAGACCATCGGCCGAGCTTT                                    |                        |   |          |          |       |     |    |            |
| UNSB01.fasta                                                                | Cele-UNSB01_6:17663802 | 6 | 17663802 | 17664403 | 602   | 6   | 40 | TTTCTCGAAT |
| TTTCTCGAATTTTCCAGAAGGTTCTAGAACATTCCAGAAA                                    |                        |   |          |          |       |     |    |            |
| UNSB01.fasta                                                                | Cele-UNSB01_6:17686729 | 6 | 17686729 | 17686834 | 106   | 7   | 15 | GAGACCCATC |
| GAGACCCATCATGGC                                                             |                        |   |          |          |       |     |    |            |
| UNSB01.fasta                                                                | Cele-UNSB01_6:17686891 | 6 | 17686891 | 17687206 | 316   | 9   | 35 | AAATTTTCTG |
| AAATTTTCTGTGAAAAATATTTTGGCGGGAAATTT                                         |                        |   |          |          |       |     |    |            |
| UNSB01.fasta                                                                | Cele-UNSB01_6:17686552 | 6 | 17686552 | 17689936 | 3385  | 70  | 40 | AATGTTCCAG |
| AATGTTCCAGAACCTTCTGAAAAATTCTAGAAAAATCTGG                                    |                        |   |          |          |       |     |    |            |
| UNSB01.fasta                                                                | Cele-UNSB01_6:17722232 | 6 | 17722232 | 17722379 | 148   | 8   | 15 | GGGGGCAACA |
| GGGGGCAACAAATTA                                                             |                        |   |          |          |       |     |    |            |
| UNSB01.fasta                                                                | Cele-UNSB01_6:17820421 | 6 | 17820421 | 17836619 | 16199 | 357 | 45 | CTCCATCCAC |
| CTCCATCCACCAGCACTGCTTCGAGTACGACAGAAAGCACTTCGA                               |                        |   |          |          |       |     |    |            |
| UNSB01.fasta                                                                | Cele-UNSB01_6:18063681 | 6 | 18063681 | 18064057 | 377   | 7   | 36 | CCACCAACTC |
| CCACCAACACCAAAATCAGCTGCTCCATCAGAGGTT                                        |                        |   |          |          |       |     |    |            |
| UNSB01.fasta                                                                | Cele-UNSB01_6:18106897 | 6 | 18106897 | 18110840 | 3944  | 258 | 12 | TTAGGCTTAG |
| TCAGGCTTAGGC                                                                |                        |   |          |          |       |     |    |            |
