# Supplementary material for: DNA Satellites Are Transcribed as Part of the Non-Coding Genome in Eukaryotes and Bacteria
Source: MDPI journal article supplement (doi:10.3390/genes12111651), 2021-10-20
Supplement: s1 [file s1]

**Table S4. Satellite families in *C.elegans***

| Genome                                                                                                               | Family name               | Number of sequences | Alignment length | Score       | Consensus without gaps      |
|----------------------------------------------------------------------------------------------------------------------|---------------------------|---------------------|------------------|-------------|-----------------------------|
| Cele-UNSB01                                                                                                          | Cele-UNSB01_Fam_1_12_169  | 169                 | 14               | 0.769097    | AGGCTTAGGCTT                |
| Cele-UNSB01                                                                                                          | Cele-UNSB01_Fam_2_35_166  | 166                 | 46               | 0.624350    |                             |
| AAAtgAAAATTTCCGGCAAATCGGCAAaTTGCCGg                                                                                  |                           |                     |                  |             |                             |
| Cele-UNSB01                                                                                                          | Cele-UNSB01_Fam_3_15_146  | 146                 | 15               | 0.943142    | AGACCCaTCGTGGTG             |
| Cele-UNSB01                                                                                                          | Cele-UNSB01_Fam_4_35_122  | 122                 | 43               | 0.628454    |                             |
| ATTtcCCGCCAAAAtntTTTTCaCaGAAAATTTgA                                                                                  |                           |                     |                  |             |                             |
| Cele-UNSB01                                                                                                          | Cele-UNSB01_Fam_5_40_94   | 94                  | 41               | 0.668259    | GTACTcCTACA                 |
| AantTTCTnGAAnaTTCcAGAAttTTCcAGAaTTTTTCcAG                                                                            |                           |                     |                  |             |                             |
| Cele-UNSB01                                                                                                          | Cele-UNSB01_Fam_6_11_76   | 76                  | 12               | 0.808392    |                             |
| Cele-UNSB01                                                                                                          | Cele-UNSB01_Fam_7_15_70   | 70                  | 15               | 0.830265    | cTCCCCTTTTCGtAG             |
| Cele-UNSB01                                                                                                          | Cele-UNSB01_Fam_8_16_50   | 50                  | 16               | 0.867364    | CTACaTGCCTACaTGC            |
| Cele-UNSB01                                                                                                          | Cele-UNSB01_Fam_9_20_48   | 48                  | 20               | 0.805585    | tAcACGaAAAAATAGATTGt        |
| Cele-UNSB01                                                                                                          | Cele-UNSB01_Fam_10_25_41  | 41                  | 27               | 0.791177    | TTTACTCTCTGGCTTCaCantATAT   |
| Cele-UNSB01                                                                                                          | Cele-UNSB01_Fam_11_45_30  | 30                  | 46               | 0.806030    | tATtGATTTTTTcTGnAAATT       |
| AAGGATCAGAnCatCAGgAGGTACCctTgtGATCCTTCGgAgCTG                                                                        |                           |                     |                  |             |                             |
| Cele-UNSB01                                                                                                          | Cele-UNSB01_Fam_12_20_29  | 29                  | 25               | 0.605057    |                             |
| Cele-UNSB01                                                                                                          | Cele-UNSB01_Fam_13_31_27  | 27                  | 32               | 0.817159    | cAGAGTCAcTAtTTTTtGGTGAAcGGc |
| TAAATAtTTAGCAGACCAaAgtTgGGTaTGC                                                                                      |                           |                     |                  |             |                             |
| Cele-UNSB01                                                                                                          | Cele-UNSB01_Fam_14_43_26  | 26                  | 46               | 0.721271    |                             |
| TTTGCCGGAAATTTTcAaTTcCGGCAaTTGCCGgTTTGCCGA                                                                           |                           |                     |                  | TTTTGCACATT |                             |
| Cele-UNSB01                                                                                                          | Cele-UNSB01_Fam_15_26_22  | 22                  | 26               |             | 0.774226                    |
| Cele-UNSB01                                                                                                          | Cele-UNSB01_Fam_16_11_21  | 21                  | 11               |             | 0.924964                    |
| Cele-UNSB01                                                                                                          | Cele-UNSB01_Fam_17_37_19  | 19                  | 44               | 0.712431    | CAAGGCActAGAAtTGCGc         |
| GGGAATTCAAAtTTTAATTTTTtGAAAAtATTTTGGC                                                                                |                           |                     |                  |             |                             |
| Cele-UNSB01                                                                                                          | Cele-UNSB01_Fam_18_19_18  | 18                  | 19               | 0.859420    |                             |
| Cele-UNSB01                                                                                                          | Cele-UNSB01_Fam_19_14_17  | 17                  | 14               | 0.892682    | ACTACAaACTACAA              |
| Cele-UNSB01                                                                                                          | Cele-UNSB01_Fam_20_12_15  | 15                  | 14               | 0.745805    | TGTATATGTATA                |
| Cele-UNSB01                                                                                                          | Cele-UNSB01_Fam_21_18_14  | 14                  | 18               | 0.786121    | TGCAAgACTAaTAGaGac          |
| Cele-UNSB01                                                                                                          | Cele-UNSB01_Fam_22_59_13  | 13                  | 60               | 0.818661    | CtAGGCAGACCTAGCCTACC        |
| AAAACcAGTGcAcattTTGAAtTTCCATATTctCCATAATTCTCgGTTTTtAAAAaTTTTG                                                        |                           |                     |                  |             |                             |
| Cele-UNSB01                                                                                                          | Cele-UNSB01_Fam_23_20_12  | 12                  | 21               | 0.831890    |                             |
| Cele-UNSB01                                                                                                          | Cele-UNSB01_Fam_24_32_11  | 11                  | 34               | 0.834759    | ACgCGacACGCA                |
| CTACAAACTACAAGTTTTGGGCGCTGCTaAgA                                                                                     |                           |                     |                  |             |                             |
| Cele-UNSB01                                                                                                          | Cele-UNSB01_Fam_25_12_11  | 11                  | 12               | 0.746970    |                             |
| Cele-UNSB01                                                                                                          | Cele-UNSB01_Fam_26_163_10 | 10                  | 172              | 0.762446    | TAGAcCattAGATgAATTtccAAAGT  |
| ATCATATggAGTcATTCTTTTTTaTTtcATAAAACTgTTCAGcATAGTCAAAaATACCAGAAaATgCcAAaCAAAGTATanTAGCTTGTTACGGAAGTatTTTTTTtaAAAATtga |                           |                     |                  |             |                             |
| taAAAATatATAAAAGCTGaTtTTTTCAAAAATTCAAAAGTatgggAAA                                                                    |                           |                     |                  |             |                             |
| Cele-UNSB01                                                                                                          | Cele-UNSB01_Fam_27_31_10  | 10                  | 37               | 0.720120    | TAGAcCattAGATgAATTtccAAAGT  |
| ATTTCCCGCCAAAAtTgaCTGAAAATTTGA                                                                                       |                           |                     |                  |             |                             |
| Cele-UNSB01                                                                                                          | Cele-UNSB01_Fam_28_26_10  | 10                  | 27               | 0.716324    |                             |

|                                                                                                                    |                          |    |     |          |                            |
|--------------------------------------------------------------------------------------------------------------------|--------------------------|----|-----|----------|----------------------------|
| Cele-UNSB01                                                                                                        | Cele-UNSB01_Fam_29_21_10 | 10 | 23  | 0.611433 | ATGCACTGACCAAanTatga       |
| Cele-UNSB01                                                                                                        | Cele-UNSB01_Fam_30_12_10 | 10 | 14  | 0.713757 | tTTTTATTTT                 |
| Cele-UNSB01                                                                                                        | Cele-UNSB01_Fam_31_42_9  | 9  | 42  | 0.733686 |                            |
| CngaAAATTTcgaaAACCGGCAATTGCCgAAaTTGCCGAntg                                                                         |                          |    |     |          |                            |
| Cele-UNSB01                                                                                                        | Cele-UNSB01_Fam_32_26_9  | 9  | 26  | 0.800214 | ATTgCGGCgGATTtTagaAAAaTGGC |
| Cele-UNSB01                                                                                                        | Cele-UNSB01_Fam_33_18_9  | 9  | 23  | 0.628019 | cAAAAATCaATAATTTCa         |
| Cele-UNSB01                                                                                                        | Cele-UNSB01_Fam_34_12_9  | 9  | 15  | 0.680247 | CTATACCTATAc               |
| Cele-UNSB01                                                                                                        | Cele-UNSB01_Fam_35_12_9  | 9  | 12  | 0.876543 | TCTAaGTCTAaG               |
| Cele-UNSB01                                                                                                        | Cele-UNSB01_Fam_36_10_9  | 9  | 11  | 0.771465 | GCGgtAGCGG                 |
| Cele-UNSB01                                                                                                        | Cele-UNSB01_Fam_37_18_8  | 8  | 19  | 0.681391 | TAAGCCTAAGcCTaAgCc         |
| Cele-UNSB01                                                                                                        | Cele-UNSB01_Fam_38_18_8  | 8  | 19  | 0.829261 | ATTAGCAGCGcCCAAAAa         |
| Cele-UNSB01                                                                                                        | Cele-UNSB01_Fam_39_14_8  | 8  | 14  | 0.894558 | GCTATaCGCTATaC             |
| Cele-UNSB01                                                                                                        | Cele-UNSB01_Fam_40_166_7 | 7  | 173 | 0.740343 |                            |
| tAtcAaTTTcAGacGCGCTAgagGGTTTTTGTcTtGaaTTCCAATTTcaACagntatannAGGCnCAAAAAACAAAAATAAAAAaTTtTGGAAaTTtnGGAnAATTTTTTATAG |                          |    |     |          |                            |
| ATTTGgATTCTAGATTnTTTAAAAATATTaTTGGTAaGTTTtTGgaCCaagA                                                               |                          |    |     |          |                            |
| Cele-UNSB01                                                                                                        | Cele-UNSB01_Fam_41_95_7  | 7  | 96  | 0.868386 |                            |
| AGGGCCGCAGGCCGAaTACTctTGGAACTatGGGctgGCTTTaATCCTATTCCaAGCAGATTGTTATTCaCTCAAGCCTAnnAACCAGGTTtG                      |                          |    |     |          |                            |
| Cele-UNSB01                                                                                                        | Cele-UNSB01_Fam_42_19_7  | 7  | 23  | 0.619048 | TAATtaaTattTATTTAtT        |
| Cele-UNSB01                                                                                                        | Cele-UNSB01_Fam_43_19_7  | 7  | 21  | 0.666667 | CTCAACCAaaAttcTnAGC        |
| Cele-UNSB01                                                                                                        | Cele-UNSB01_Fam_44_21_7  | 7  | 21  | 0.628118 | cAATTTTtggccTAAAAAttn      |
| Cele-UNSB01                                                                                                        | Cele-UNSB01_Fam_45_16_7  | 7  | 16  | 0.732143 | TCTaAGGATCTaAGGA           |
| Cele-UNSB01                                                                                                        | Cele-UNSB01_Fam_46_226_6 | 6  | 228 | 0.781092 |                            |
| GTAACtaCgtGAAGCTTCTtGcACCTACTGGaATaTTGTTggTAtATTCTaAAAgAGCTTaaAATTTaCtACAAAGTTTCTGAAAGAcATTTCAAAAAAGTTacTTTGAAGaG  |                          |    |     |          |                            |
| ATTTatGAATTTTCAAAGTTTcGaAAATtcatCTAtTTTTGCCTATAAAATGGTaGTTTTTCATTaAATAATAAAATACGCACtaAAAGGTAgggCTGaaaAtGTactaTTTCT |                          |    |     |          |                            |
| Cele-UNSB01                                                                                                        | Cele-UNSB01_Fam_47_94_6  | 6  | 94  | 0.946099 |                            |
| TCAAAATCTTCTGTTCTCTAAATATTGGGTGCTTTTCGATGCCCTaTGTAGACAAATCAATGGGAAAATcaTCAATTTCTGAAGGCAGTAATTC                     |                          |    |     |          |                            |
| Cele-UNSB01                                                                                                        | Cele-UNSB01_Fam_48_33_6  | 6  | 33  | 0.649832 |                            |
| GCTGATTGGtTcAgAAAgTGGGCGgaGCTaAtC                                                                                  |                          |    |     |          |                            |
| Cele-UNSB01                                                                                                        | Cele-UNSB01_Fam_49_21_6  | 6  | 25  | 0.624889 | CTGACcAAATTTtGTTcCaGCA     |
| Cele-UNSB01                                                                                                        | Cele-UNSB01_Fam_50_21_6  | 6  | 22  | 0.621212 | TGACaAAAtnTnaaTTTGCAC      |
| Cele-UNSB01                                                                                                        | Cele-UNSB01_Fam_51_19_6  | 6  | 21  | 0.706878 | gaAATTATCGATTTTTtCga       |
| Cele-UNSB01                                                                                                        | Cele-UNSB01_Fam_52_18_6  | 6  | 19  | 0.691228 | ngGTAGgCAATGAGCAAg         |
| Cele-UNSB01                                                                                                        | Cele-UNSB01_Fam_53_17_6  | 6  | 18  | 0.858025 | GATGCCCCCTcTGAACG          |
| Cele-UNSB01                                                                                                        | Cele-UNSB01_Fam_54_16_6  | 6  | 16  | 0.865278 | AATTTTTCCgCaGCaA           |
| Cele-UNSB01                                                                                                        | Cele-UNSB01_Fam_55_15_6  | 6  | 15  | 0.952593 | GGGGCAACAAAAaA             |
| Cele-UNSB01                                                                                                        | Cele-UNSB01_Fam_56_11_6  | 6  | 11  | 0.838384 | aAGTTGTCACg                |
| Cele-UNSB01                                                                                                        | Cele-UNSB01_Fam_57_200_5 | 5  | 228 | 0.666228 |                            |
| AACgGcATTtCAAaAaTTtcaaAaccgCCaAgTTCaagCAGaaaaagtGAATTTTcAgtcATacctTgTagACcacaAtTTATaTgCAAAATTAaTAGAtTTTCCAAacTTTg  |                          |    |     |          |                            |
| AAAATTAATtTCTGGCTTCAAaCTAACTTTTTtTaaAAATtCCCGTaGCCATTTTGTaGCAAATTTTatGtTCTtTCAGAATTTaAA                            |                          |    |     |          |                            |
| Cele-UNSB01                                                                                                        | Cele-UNSB01_Fam_58_48_5  | 5  | 48  | 0.900000 |                            |
| TTGCCCGTAATTTATAtTTTCTGAAGATGAGcAATTTaAtTtTTGAt                                                                    |                          |    |     |          |                            |
| Cele-UNSB01                                                                                                        | Cele-UNSB01_Fam_59_31_5  | 5  | 32  | 0.826042 |                            |
| TGTCTAGCGAGatagCAGAAaAGAGCTGAGT                                                                                    |                          |    |     |          |                            |
| Cele-UNSB01                                                                                                        | Cele-UNSB01_Fam_60_25_5  | 5  | 25  | 0.904000 | TTACTCTAATGTTCTGCcAAtttAT  |
| Cele-UNSB01                                                                                                        | Cele-UNSB01_Fam_61_19_5  | 5  | 22  | 0.775758 | TGGTTGAGGCTCTcgATTT        |

|                                                                                                                      |                          |   |     |          |                             |
|----------------------------------------------------------------------------------------------------------------------|--------------------------|---|-----|----------|-----------------------------|
| Cele-UNSB01                                                                                                          | Cele-UNSB01_Fam_62_21_5  | 5 | 22  | 0.863636 | AATCCAATATGGacgAAATCT       |
| Cele-UNSB01                                                                                                          | Cele-UNSB01_Fam_63_19_5  | 5 | 21  | 0.695238 | AAAtTTacCAATTTAcCAAa        |
| Cele-UNSB01                                                                                                          | Cele-UNSB01_Fam_64_17_5  | 5 | 18  | 0.848148 | TcATTCCGTgATTATTT           |
| Cele-UNSB01                                                                                                          | Cele-UNSB01_Fam_65_11_5  | 5 | 14  | 0.697619 | TGCTTgCCTAC                 |
| Cele-UNSB01                                                                                                          | Cele-UNSB01_Fam_66_11_5  | 5 | 11  | 0.951515 | TTTGAGCGGt                  |
| Cele-UNSB01                                                                                                          | Cele-UNSB01_Fam_67_184_4 | 4 | 189 | 0.862140 |                             |
| GAATACAGAACACCAaTTATGtCCGAGAAAAAGATCCTAcTCAGAATATAaACATATtCGAATttatCGGATGTATAaAGATTCCCGAAGAcACTTTCCAATTAcCCAAAttGT   |                          |   |     |          |                             |
| TCAtATTCTAAAtgAaATTCTCTTACTaGAACACTCTTGGCCAATGTACGCAGCCGAACGTATCATAAGT                                               |                          |   |     |          |                             |
| Cele-UNSB01                                                                                                          | Cele-UNSB01_Fam_68_64_4  | 4 | 67  | 0.721393 |                             |
| gGTCTGCTAaATCaAAacTTGTAGTTTGTAGtCTAGCAGACCaaAtTTcTtcAAaACCaCaTtG                                                     |                          |   |     |          |                             |
| Cele-UNSB01                                                                                                          | Cele-UNSB01_Fam_69_39_4  | 4 | 40  | 0.856944 |                             |
| TAtTTTTAAAttTgaCCTaCTTAAAAAGTAGGTCATGACC                                                                             |                          |   |     |          |                             |
| Cele-UNSB01                                                                                                          | Cele-UNSB01_Fam_70_36_4  | 4 | 36  | 0.754630 |                             |
| tTTCGGCAAtTTcGacAATTGCCGGTTTtggaAAtt                                                                                 |                          |   |     |          |                             |
| Cele-UNSB01                                                                                                          | Cele-UNSB01_Fam_71_30_4  | 4 | 30  | 0.777778 |                             |
| TTTCTAGAAAAaTcTGGAAagTTCTAGAAAt                                                                                      |                          |   |     |          |                             |
| Cele-UNSB01                                                                                                          | Cele-UNSB01_Fam_72_30_4  | 4 | 30  | 0.983333 |                             |
| AATTTTCCAGAAGGTTCTGGAACaTTCCAG                                                                                       |                          |   |     |          |                             |
| Cele-UNSB01                                                                                                          | Cele-UNSB01_Fam_73_20_4  | 4 | 23  | 0.677536 | tTtACTAAAAATCTcAAAa         |
| Cele-UNSB01                                                                                                          | Cele-UNSB01_Fam_74_21_4  | 4 | 22  | 0.651515 | GTcAGTGCAActtTgcAatTG       |
| Cele-UNSB01                                                                                                          | Cele-UNSB01_Fam_75_20_4  | 4 | 20  | 0.744444 | gTgAAAAATtTaAATTTtTgA       |
| Cele-UNSB01                                                                                                          | Cele-UNSB01_Fam_76_14_4  | 4 | 15  | 0.727778 | TTaGGGCcTtgGGC              |
| Cele-UNSB01                                                                                                          | Cele-UNSB01_Fam_77_15_4  | 4 | 15  | 0.955556 | TTTCCGGATCTACGt             |
| Cele-UNSB01                                                                                                          | Cele-UNSB01_Fam_78_13_4  | 4 | 13  | 0.897436 | GCCTATGGCcTAc               |
| Cele-UNSB01                                                                                                          | Cele-UNSB01_Fam_79_12_4  | 4 | 12  | 0.840278 | TTTTtCCGAAAt                |
| Cele-UNSB01                                                                                                          | Cele-UNSB01_Fam_80_12_4  | 4 | 12  | 0.662037 | AgaAgGAGGgAaa               |
| Cele-UNSB01                                                                                                          | Cele-UNSB01_Fam_81_10_4  | 4 | 10  | 0.800000 | TCccGATCcA                  |
| Cele-UNSB01                                                                                                          | Cele-UNSB01_Fam_82_167_3 | 3 | 172 | 0.651809 |                             |
| nTATAATGcTCGTAATTATTTATAAGTgTGTGTTGTCTCAGAgcCAngTCTgAAAAaACAGATTTTTTtTcGAAAAATTTtAAaAacttcGtAaAAATTCgATTTTTtGACanaTc |                          |   |     |          |                             |
| tATgnTctCTnTTTTTtTntgAcATgTAtTTCAGTGAcAtAnaganTcAaAAa                                                                |                          |   |     |          |                             |
| Cele-UNSB01                                                                                                          | Cele-UNSB01_Fam_83_90_3  | 3 | 95  | 0.673684 |                             |
| ccccGAACGTGTGCGCCGCTTCCAAAtAACcACCTccTngCACTaCgTTGCGCACACAcnaanctaCTcgTTTCACGcCAAgCTgCGGAA                           |                          |   |     |          |                             |
| Cele-UNSB01                                                                                                          | Cele-UNSB01_Fam_84_79_3  | 3 | 79  | 0.909986 |                             |
| gTGAATCTCCTcTCTaCCTAATGAgtCCTGACAGAATACCGGCAGTATTcTGGGGTCTCATTAGGTTTTaGTTTCTTcT                                      |                          |   |     |          |                             |
| Cele-UNSB01                                                                                                          | Cele-UNSB01_Fam_85_76_3  | 3 | 76  | 0.906433 |                             |
| AATGCTAGAgGACAcTCCTTTGCACGAAaGgAAGTGGGAGAGACTGTGGaGTTGTGCGGTGTCTtTGTgCATGCTCg                                        |                          |   |     |          |                             |
| Cele-UNSB01                                                                                                          | Cele-UNSB01_Fam_86_64_3  | 3 | 64  | 0.954861 |                             |
| TTTTTGACTAcTGAATGTCTTTTTCGCTACTGACTGaAAAAATAGCTACATTTCGCACTTTTgtC                                                    |                          |   |     |          |                             |
| Cele-UNSB01                                                                                                          | Cele-UNSB01_Fam_87_34_3  | 3 | 34  | 0.980392 |                             |
| ATGCACCATGTCAAAAAATATATCCAAAAGTACG                                                                                   |                          |   |     |          |                             |
| Cele-UNSB01                                                                                                          | Cele-UNSB01_Fam_88_32_3  | 3 | 32  | 0.972222 |                             |
| GCACCAATAGCACCAATgTAGCACCGATGGA                                                                                      |                          |   |     |          |                             |
| Cele-UNSB01                                                                                                          | Cele-UNSB01_Fam_89_32_3  | 3 | 32  | 0.972222 |                             |
| CGACCTGCGACCTAGCGACCTaGGTCGCTTTG                                                                                     |                          |   |     |          |                             |
| Cele-UNSB01                                                                                                          | Cele-UNSB01_Fam_90_27_3  | 3 | 27  | 0.658436 | aGCaGCCCACACCTtaCnGGTtgcttA |

|                                                                                                                     |                           |   |     |          |                        |
|---------------------------------------------------------------------------------------------------------------------|---------------------------|---|-----|----------|------------------------|
| Cele-UNSB01                                                                                                         | Cele-UNSB01_Fam_91_21_3   | 3 | 23  | 0.801932 | CTAgAAAACTCGGCCAtCAA   |
| Cele-UNSB01                                                                                                         | Cele-UNSB01_Fam_92_21_3   | 3 | 23  | 0.748792 | TAGTTTaTAGTTTGtaGTTTG  |
| Cele-UNSB01                                                                                                         | Cele-UNSB01_Fam_93_20_3   | 3 | 22  | 0.656566 | GTCGATTTACGgGAgTTcnT   |
| Cele-UNSB01                                                                                                         | Cele-UNSB01_Fam_94_21_3   | 3 | 22  | 0.843434 | CCATTTTAAGCCAATTTTggA  |
| Cele-UNSB01                                                                                                         | Cele-UNSB01_Fam_95_22_3   | 3 | 22  | 0.777778 | AcTACAGTAccCcTACAgTACc |
| Cele-UNSB01                                                                                                         | Cele-UNSB01_Fam_96_19_3   | 3 | 21  | 0.608466 | GCCTAGaAATCtnAtgATG    |
| Cele-UNSB01                                                                                                         | Cele-UNSB01_Fam_97_18_3   | 3 | 21  | 0.761905 | TTTTGTCAGTGCTATAgT     |
| Cele-UNSB01                                                                                                         | Cele-UNSB01_Fam_98_20_3   | 3 | 21  | 0.719577 | GTAAATCTACActaGCTncC   |
| Cele-UNSB01                                                                                                         | Cele-UNSB01_Fam_99_21_3   | 3 | 21  | 0.767196 | ACTACcGTACCaaCtACcACa  |
| Cele-UNSB01                                                                                                         | Cele-UNSB01_Fam_100_21_3  | 3 | 21  | 0.957672 | CTAACATTTTTCAaTTTTTCGT |
| Cele-UNSB01                                                                                                         | Cele-UNSB01_Fam_101_21_3  | 3 | 21  | 0.682540 | GTgcaaatgnAtnnnttGgTca |
| Cele-UNSB01                                                                                                         | Cele-UNSB01_Fam_102_20_3  | 3 | 20  | 0.688889 | GTAAATCtACAtAgaaCntC   |
| Cele-UNSB01                                                                                                         | Cele-UNSB01_Fam_103_20_3  | 3 | 20  | 0.822222 | AtACGAtATAGCTATttACG   |
| Cele-UNSB01                                                                                                         | Cele-UNSB01_Fam_104_16_3  | 3 | 16  | 0.777778 | TTcCAGGgTTcCAGGg       |
| Cele-UNSB01                                                                                                         | Cele-UNSB01_Fam_105_11_3  | 3 | 12  | 0.787037 | ATTTGgAATAT            |
| Cele-UNSB01                                                                                                         | Cele-UNSB01_Fam_106_11_3  | 3 | 12  | 0.722222 | ncCACTGACCA            |
| Cele-UNSB01                                                                                                         | Cele-UNSB01_Fam_107_151_2 | 2 | 151 | 0.924945 |                        |
| TTTAAAGGCGCATAGGTAGtTCAAANTTCAAANTTGACGGATTCTAGTCAATATGGGGCTTATTTTAAAGCTCTCAGTAAGCTNAAATNTANTTNAGCTACTaAaAATTGAANAT |                           |   |     |          |                        |
| TTTNAAATTTTTTGGGTCTCGCAGCGAAAAATTCGAA                                                                               |                           |   |     |          |                        |
| Cele-UNSB01                                                                                                         | Cele-UNSB01_Fam_108_119_2 | 2 | 119 | 0.607843 |                        |
| GCCacCcTTAAcCCTAAcCCAaGCAGAGCAGGacGTAGGCCTGaaAcGcGGTaGcgAcaCaaTCAaGCCcAAcAacCaGGgaTGAGGGCCGAGGCCCGaaaaACTCTTaGAAAC  |                           |   |     |          |                        |
| TgTaG                                                                                                               |                           |   |     |          |                        |
| Cele-UNSB01                                                                                                         | Cele-UNSB01_Fam_109_110_2 | 2 | 110 | 0.745455 |                        |
| TTTCACaTTTTTCacgTGATTATaTAGGTCACGAaCcAAaTTATTTGAAAATTGAcCTacacGGacCTaTAACTTTGGAGaTATGGGgAATcaAGTATGaGCTTTCAGAT      |                           |   |     |          |                        |
| Cele-UNSB01                                                                                                         | Cele-UNSB01_Fam_110_86_2  | 2 | 86  | 0.689922 |                        |
| CAATAggGAAAAGATGGAAGAcTaCgaAGttAAcgAgAAgCTATTGacAGACCCCCGAAATACTGGCTGTATTTTGAAAGGTCaTcg                             |                           |   |     |          |                        |
| Cele-UNSB01                                                                                                         | Cele-UNSB01_Fam_111_73_2  | 2 | 73  | 0.945205 |                        |
| AATAAAATATTGGAAATCCcTATGACACACTTAAGCCTAAAGGCCCGAAAAaAaACTAGGATGCCCAACTGG                                            |                           |   |     |          |                        |
| Cele-UNSB01                                                                                                         | Cele-UNSB01_Fam_112_71_2  | 2 | 71  | 0.626761 |                        |
| aAGACACTAATAAAAAATaTTaaATTTTTATTTCGTCTcTAAaTTTgAaAAtAtATTTTcttaATaAAAAATag                                          |                           |   |     |          |                        |
| Cele-UNSB01                                                                                                         | Cele-UNSB01_Fam_113_68_2  | 2 | 68  | 0.838235 |                        |
| CAAATCAACCTATTTCAGTTGACAATGGTTTTCTTTTAcCAAAaTTcTTaaAATTTcagAAAGAAAACA                                               |                           |   |     |          |                        |
| Cele-UNSB01                                                                                                         | Cele-UNSB01_Fam_114_44_2  | 2 | 44  | 0.681818 |                        |
| cCAGCCGACAGCCGAAAAaTTcacGaATTTTCGGCTGGTaGCac                                                                        |                           |   |     |          |                        |
| Cele-UNSB01                                                                                                         | Cele-UNSB01_Fam_115_44_2  | 2 | 44  | 0.704545 |                        |
| aCGGCAAAtTCGGCAAaTnCTgcTTTTTTcAAaATTTGCCGAGC                                                                        |                           |   |     |          |                        |
| Cele-UNSB01                                                                                                         | Cele-UNSB01_Fam_116_44_2  | 2 | 44  | 0.969697 |                        |
| CTGTTTTCTGAGCATTgTAGATTTTCGGATTGATGGCCGAAAGG                                                                        |                           |   |     |          |                        |
| Cele-UNSB01                                                                                                         | Cele-UNSB01_Fam_117_41_2  | 2 | 41  | 0.711382 |                        |
| ccGTTTTCGCcTTGAGCGATTcCttACCCTTAAATGGGCccC                                                                          |                           |   |     |          |                        |
| Cele-UNSB01                                                                                                         | Cele-UNSB01_Fam_118_41_2  | 2 | 41  | 1.000000 |                        |
| AAAACGGGAAAACGGGAATTCCCGTTCCCGTGAAAAATTTTA                                                                          |                           |   |     |          |                        |
| Cele-UNSB01                                                                                                         | Cele-UNSB01_Fam_119_40_2  | 2 | 40  | 0.975000 |                        |
| AAAATCCACGTAGATTATTGATTTTTTCATgGAATTTTGCA                                                                           |                           |   |     |          |                        |

|                                         |                          |   |    |          |                             |
|-----------------------------------------|--------------------------|---|----|----------|-----------------------------|
| Cele-UNSB01                             | Cele-UNSB01_Fam_120_39_2 | 2 | 39 | 0.897436 |                             |
| TTTATGaAAAAGTGGCTCTAGaGCCACaAGAAATACCAG |                          |   |    |          |                             |
| Cele-UNSB01                             | Cele-UNSB01_Fam_121_36_2 | 2 | 36 | 0.601852 |                             |
| cGGCAaAtTaCCaTaAATTTTaAAATcCGGCAaAAc    |                          |   |    |          |                             |
| Cele-UNSB01                             | Cele-UNSB01_Fam_122_35_2 | 2 | 35 | 0.666667 |                             |
| AAAATCGaaaAATTcTCGaTTTTTCAATTTTTaga     |                          |   |    |          |                             |
| Cele-UNSB01                             | Cele-UNSB01_Fam_123_34_2 | 2 | 34 | 0.612745 |                             |
| cCaCCCGGcAGGTGTCGGCTGCTaaaaCTAtAaC      |                          |   |    |          |                             |
| Cele-UNSB01                             | Cele-UNSB01_Fam_124_32_2 | 2 | 32 | 0.671875 |                             |
| tTTTTTGAGCcaAAAATTCTaAAAAATgCTCa        |                          |   |    |          |                             |
| Cele-UNSB01                             | Cele-UNSB01_Fam_125_31_2 | 2 | 31 | 0.752688 |                             |
| GGTTACTGTAAAATCaATcaTAGGATACTTtG        |                          |   |    |          |                             |
| Cele-UNSB01                             | Cele-UNSB01_Fam_126_31_2 | 2 | 31 | 0.784946 |                             |
| CTGAAATTacaAaTTTCCAaTGTA AAAATGT        |                          |   |    |          |                             |
| Cele-UNSB01                             | Cele-UNSB01_Fam_127_31_2 | 2 | 31 | 0.956989 |                             |
| TCGACAGAAGCTGTCTGGAAATCACACTTTCC        |                          |   |    |          |                             |
| Cele-UNSB01                             | Cele-UNSB01_Fam_128_27_2 | 2 | 27 | 0.901235 | GCTGCTGGAGGATCaACTGCATCAACc |
| Cele-UNSB01                             | Cele-UNSB01_Fam_129_26_2 | 2 | 26 | 1.000000 | CAAAACCGCAATTGCCGAAAATTCC   |
| Cele-UNSB01                             | Cele-UNSB01_Fam_130_26_2 | 2 | 26 | 0.948718 | TCAaGGCGAAACGGGAGGTGAATCGC  |
| Cele-UNSB01                             | Cele-UNSB01_Fam_131_24_2 | 2 | 24 | 0.722222 | gGCATCTGccGCCcGGAGCTGGaGC   |
| Cele-UNSB01                             | Cele-UNSB01_Fam_132_24_2 | 2 | 24 | 0.680556 | GCcTAGaCTcaGGCTTAGGCTtAa    |
| Cele-UNSB01                             | Cele-UNSB01_Fam_133_23_2 | 2 | 23 | 0.630435 | aATTTCTAGGCCACcAcgTTcAg     |
| Cele-UNSB01                             | Cele-UNSB01_Fam_134_23_2 | 2 | 23 | 0.673913 | tCTAATTAGATnCaCCTtCtTTTT    |
| Cele-UNSB01                             | Cele-UNSB01_Fam_135_23_2 | 2 | 23 | 0.659420 | ATTaaATTTTTCAaCaaAAAAAa     |
| Cele-UNSB01                             | Cele-UNSB01_Fam_136_22_2 | 2 | 22 | 0.643939 | aATAAAAAATgTCACAAAAAtATg    |
| Cele-UNSB01                             | Cele-UNSB01_Fam_137_22_2 | 2 | 22 | 0.681818 | GTAAATCTACaCaaATagCCCC      |
| Cele-UNSB01                             | Cele-UNSB01_Fam_138_22_2 | 2 | 22 | 0.621212 | TTcaAGCcaTTTTTCaGACcAAT     |
| Cele-UNSB01                             | Cele-UNSB01_Fam_139_22_2 | 2 | 22 | 0.765152 | TTTGCACTGACCAAcAaaAATg      |
| Cele-UNSB01                             | Cele-UNSB01_Fam_140_22_2 | 2 | 22 | 1.000000 | TCGAGAAAAAATCTGAAAAAAT      |
| Cele-UNSB01                             | Cele-UNSB01_Fam_141_22_2 | 2 | 22 | 0.954545 | ATTCTGCGCACCCCCCTGCGCaG     |
| Cele-UNSB01                             | Cele-UNSB01_Fam_142_20_2 | 2 | 20 | 0.933333 | CCACCAAAAAgGTTTTCTAGG       |
| Cele-UNSB01                             | Cele-UNSB01_Fam_143_20_2 | 2 | 20 | 0.950000 | GGACTAGTTTTcGAGTAGAG        |
| Cele-UNSB01                             | Cele-UNSB01_Fam_144_20_2 | 2 | 20 | 0.750000 | TGTAGATTTACaaAGGaCaA        |
| Cele-UNSB01                             | Cele-UNSB01_Fam_145_20_2 | 2 | 20 | 0.866667 | CCCCGAaGCTCGAGCTCAAA        |
| Cele-UNSB01                             | Cele-UNSB01_Fam_146_20_2 | 2 | 20 | 0.800000 | CCACCTGTAAaATcATGGA         |
| Cele-UNSB01                             | Cele-UNSB01_Fam_147_19_2 | 2 | 19 | 0.684211 | CTAGGTGCCTAcTccATgC         |
| Cele-UNSB01                             | Cele-UNSB01_Fam_148_19_2 | 2 | 19 | 0.929825 | CGCCAAGgATCGAGAAAAG         |
| Cele-UNSB01                             | Cele-UNSB01_Fam_149_17_2 | 2 | 17 | 0.656863 | gCaGaTTGCCgGAATTG           |
| Cele-UNSB01                             | Cele-UNSB01_Fam_150_17_2 | 2 | 17 | 0.803922 | GCACTGAcCAAcTTTTT           |
| Cele-UNSB01                             | Cele-UNSB01_Fam_151_16_2 | 2 | 16 | 0.750000 | GTaCTGGGGTAcTGGG            |
| Cele-UNSB01                             | Cele-UNSB01_Fam_152_15_2 | 2 | 15 | 0.622222 | CGATgCTCCACCaga             |
| Cele-UNSB01                             | Cele-UNSB01_Fam_153_14_2 | 2 | 14 | 0.761905 | TaTACAAAAAnGTA              |
| Cele-UNSB01                             | Cele-UNSB01_Fam_154_14_2 | 2 | 14 | 0.666667 | cCTCAAGCgTAGGa              |
| Cele-UNSB01                             | Cele-UNSB01_Fam_155_14_2 | 2 | 14 | 1.000000 | GAAGGATCGGGCCG              |
| Cele-UNSB01                             | Cele-UNSB01_Fam_156_14_2 | 2 | 14 | 0.619048 | gATAATTgAaAATc              |

|                                                                                                                        |                           |   |     |          |              |
|------------------------------------------------------------------------------------------------------------------------|---------------------------|---|-----|----------|--------------|
| Cele-UNSB01                                                                                                            | Cele-UNSB01_Fam_157_12_2  | 2 | 12  | 0.680556 | TTggGCAAGAAa |
| Cele-UNSB01                                                                                                            | Cele-UNSB01_Fam_158_11_2  | 2 | 11  | 0.878788 | AAACTTGGGCa  |
| Cele-UNSB01                                                                                                            | Cele-UNSB01_Fam_159_11_2  | 2 | 11  | 0.636364 | cGGAAATTaA   |
| Cele-UNSB01                                                                                                            | Cele-UNSB01_Fam_160_11_2  | 2 | 11  | 0.636364 | cATAaCTGAGa  |
| Cele-UNSB01                                                                                                            | Cele-UNSB01_Fam_161_255_1 | 1 | 255 | 0.000000 |              |
| AACAAAGTCGGGAACGTTTCGGAAAGCTCTGAGGAAAACCTCCGACAATATCATGCTTAAGTACGCAATTGAGCTATCTTTATTAGATTTCGAAAAAGGACTCTTCAAAAATTGAAGC |                           |   |     |          |              |
| AATAACGAAGAAGCTTAAGTTGGAAGCTGGCGAAGCTTAAATTTGGGANTTATGCAGTCTTTATCAGATTCAAAGACGATTCTTCGACCAATGAAGCAAGTCCGGAGNACGATCT    |                           |   |     |          |              |
| ACCTTCGACTTCTGATGGCAGAACTCC                                                                                            |                           |   |     |          |              |
| Cele-UNSB01                                                                                                            | Cele-UNSB01_Fam_162_249_1 | 1 | 249 | 0.000000 |              |
| CTGGAAGCACTGTAACCATGGGATCATCAAGCACTTCCGGTGTTTCCACATCTTCAGCATCCAGTACTCAGCCTCAGATGAGCACTTCACAAGGAAGTTCAGCAGGATCCACAG     |                           |   |     |          |              |
| TTGCTTCATCAACCGCTGGCCTTGTTTCAACTTCCACAGTTCATCCTCGACAGGAACAATGGGCTCCACTTCTAGTGGAACAGTTGGATCTACAATTTCTGAATCATCGACAA      |                           |   |     |          |              |
| CAGCATCTGCAAGTTCTCAGA                                                                                                  |                           |   |     |          |              |
| Cele-UNSB01                                                                                                            | Cele-UNSB01_Fam_163_231_1 | 1 | 231 | 0.000000 |              |
| GCTGAATTGAGTTGGATATGAATGCACTTCCGTTGTGAGTGGAATATCATGAATGTTNGATGCTCGTGAAGTAGANTCNAGTGGTCCATCATAAGATTGAGACTGGATAATC       |                           |   |     |          |              |
| AAGATGAGATGGTGATTTCTTGAACAATCCAGTGATCTTAGATTTTCAAGTGATGGCTCGTCTTCTTCTGTCTCCTCGATCACAAGTGAATGACATGCTCTGGCAGCTTCTC       |                           |   |     |          |              |
| ATA                                                                                                                    |                           |   |     |          |              |
| Cele-UNSB01                                                                                                            | Cele-UNSB01_Fam_164_228_1 | 1 | 228 | 0.000000 |              |
| CCACCAGATCAGCAACGTCTCATCTTCGCCGGAAGCAACTCGAGGACGGCCGCACCCTTTCGGACTACAACATCCAGAAGGAATCAACTCTTCATTTGGTTCTCCGTCTGAGA      |                           |   |     |          |              |
| GGAGGTATGCAGATCTTCGTCAAGACATTGACCGGAAAGACCATCACCCTCGAAGTCGAAGCCTCCGACACCATCGAAAATGTCAAGGCCAAGATCCAAGACAAGGAAGGAATC     |                           |   |     |          |              |
| Cele-UNSB01                                                                                                            | Cele-UNSB01_Fam_165_189_1 | 1 | 189 | 0.000000 |              |
| TTTTTTTTTGACTATGGAATTATAAAGAAAATCGAATTTCAAAAAAGCATGTATTAGCCAATGTAAACGCGCTCCAATGATGATGTAGCCACGTGGTATCAGAGTGTCTCTTTA     |                           |   |     |          |              |
| CGGCTTGATTTAAATACGTAGATCTACAAATTCATTCTGTTTTCTCACGGGTTTAGGATATTTTTTCTGTTA                                               |                           |   |     |          |              |
| Cele-UNSB01                                                                                                            | Cele-UNSB01_Fam_166_184_1 | 1 | 184 | 0.000000 |              |
| GTTCAAAAGATACAAAATTTATCTACACATCTACAAGTTAACTTGCAACTTAGTTAACCATAATTCAAAGTTATGAGCCGGGGAACTATAATAACCAACGTTTCACACTAAAA      |                           |   |     |          |              |
| AAGCCCCAAAAAATTCGAAAATCATTTTTATCTCATGACGCGGACAAGCTACAAATGTCTAGTTAGGCTT                                                 |                           |   |     |          |              |
| Cele-UNSB01                                                                                                            | Cele-UNSB01_Fam_167_183_1 | 1 | 183 | 0.000000 |              |
| TTTCTCTGCGTCTCGCCTCGCTCACACTATTTTNCACACCAAACCTTTGAGNCTATGTATCTCTGTAAACGGGTTGCGCTTTCTGAAAAATTCCAACTGACGGGATATATAAAAT    |                           |   |     |          |              |
| TTNGAATTTCTTTCTCACCGTTAAAAAACTAAACACCTAGGCAAGACGCAGACAGCGAGANACCCCAAT                                                  |                           |   |     |          |              |
| Cele-UNSB01                                                                                                            | Cele-UNSB01_Fam_168_181_1 | 1 | 181 | 0.000000 |              |
| TTTTTAACTTTTAAATCCACTAAAACTCGGAATGGTACAGAACATGCAAATTTGTAATTTCAAGAACTGAATGTGGTTTTCGAATATTTATGGATTGCTTTATTTCTAAACTGACT   |                           |   |     |          |              |
| CTGAAATATTTTGCATCCATTTGACTACTAATTGTCATATTATACCGAACACTACTAACTTTAGTGG                                                    |                           |   |     |          |              |
| Cele-UNSB01                                                                                                            | Cele-UNSB01_Fam_169_180_1 | 1 | 180 | 0.000000 |              |
| TGTCGGCCGCTGTATCTTTTTGCCTCAATTTTTTTTNAATTTTNAACATNCATATTCCAGTAGATAACATTATGAGCTACAGTTTGTAGTTAAATTTTATTTCTAAATTTAC       |                           |   |     |          |              |
| TAGTTTCTGAGTTTATACTCATTCCAACCCACCCCAAGAGAAATTTCTTAAAAATGAACCTCGCGAGG                                                   |                           |   |     |          |              |
| Cele-UNSB01                                                                                                            | Cele-UNSB01_Fam_170_179_1 | 1 | 179 | 0.000000 |              |
| CTACCCAAATTTTGAATTTTGAAATTTTTCAAAAATTTCTCAAATTTTCAAATCCCATAATTGAGCAATTTTGGAGATTTTTCAGATATTTTAAATTGAAAATTTCTGTTTG       |                           |   |     |          |              |
| TCTTATCCATTAACTATATCGCTGCATCTACATTTTTCACAGTACCCCATGACTTTTCCCGATT                                                       |                           |   |     |          |              |
| Cele-UNSB01                                                                                                            | Cele-UNSB01_Fam_171_177_1 | 1 | 177 | 0.000000 |              |
| CTAACAAAATAATCAGCGTAAAATTTCTACATTTTACTAGTTAAACAATATTTTGATAACATCAGTGTTTTTGGAGATACGCAAGTTTAAAGGTGGACGCCCAAAAATAGTTGT     |                           |   |     |          |              |
| GAGCAGCTTTAATCAAAAACCGACATAACTTTTACTCACTAACGGTATCAAAAATGTTTTAA                                                         |                           |   |     |          |              |
| Cele-UNSB01                                                                                                            | Cele-UNSB01_Fam_172_177_1 | 1 | 177 | 0.000000 |              |
| GAGTCTCACGATGTGTCAACGTGTCTCAGTCGGCTTGATCTACGTAGATCTACAAAAATGCGGGAGAAGAGACGCAGACTTATTCTCTGATTTTGCATGAGTAAGAGCGTGCT      |                           |   |     |          |              |
| GGCGTCACATTTTTGTGCGCAAAAAATTTCCCGCATTTTTTGTAGATCAAACCGTAATGGGACG                                                       |                           |   |     |          |              |

|                                                                                                                        |                           |   |     |          |
|------------------------------------------------------------------------------------------------------------------------|---------------------------|---|-----|----------|
| Cele-UNSB01                                                                                                            | Cele-UNSB01_Fam_173_175_1 | 1 | 175 | 0.000000 |
| GATGCACCATGTCTTTGACAGTCAATATCTCGGTTTATTTTGTAGCTATCAAAAAATTTTCAACTACAAATCTATAGAAAATTAAATGTTCAACATTTTCTCAGTTGACAGTTT     |                           |   |     |          |
| TTTGATAACTGCAATGACATCCGAGATATGAGCTTTCAAAGTTGAGAGACCTCACTCGGTT                                                          |                           |   |     |          |
| Cele-UNSB01                                                                                                            | Cele-UNSB01_Fam_174_175_1 | 1 | 175 | 0.000000 |
| AACTTGTGACGGTGGGTATGGATTTTATGCACATAATTTGTTTCGAAATAGTCTACCNAGTAACTGGTGAAGTTTCAAAAACTTTGTGGATCTAGTTTTTGAAAAAGTTCAAA      |                           |   |     |          |
| ATTGTGCCAATTTTGACCAATTTTGGTGGTTTTCTGAGCTAAAATTGAAAAGTTGGGAATG                                                          |                           |   |     |          |
| Cele-UNSB01                                                                                                            | Cele-UNSB01_Fam_175_175_1 | 1 | 175 | 0.000000 |
| AAATTTTGGGTTCACTCTTTTTACTAGACAGTGATTGTTGCATTGTAGGATTCGGTGGACTTGTCCAACAACCTTACTTTGGCATGAGTTTAATAAAAAAGGTTTTTACCATGAACT  |                           |   |     |          |
| GAATCAATTCAAAATAAAAAACCTCGAGAATGAAAAACATCCTCAGTAATTTCAATCCTGTTC                                                        |                           |   |     |          |
| Cele-UNSB01                                                                                                            | Cele-UNSB01_Fam_176_174_1 | 1 | 174 | 0.000000 |
| CTTCAAGAGCTCAGTGTTATTTATGACATGCCAACCTCGACAAATTGACCTGAACATGCTCCAAGGAATCGAAGACAACCTTGAACAGCCTTCCAGCTGAAGAATCTGATAAGATC   |                           |   |     |          |
| CGAGAGAAGATTAACGATCTGAGAAGAAGGAAACAAGAAAGCGATCAAGCTGAAGCTCTT                                                           |                           |   |     |          |
| Cele-UNSB01                                                                                                            | Cele-UNSB01_Fam_177_165_1 | 1 | 165 | 0.000000 |
| CTTTTCCAAAATGGCAATTTTGTATGAAAAAATCCGAATTTTCACAAATTTCAAAAAATTTTAACTTTTATAATTTTAGCTTTGAATATTCCAAATGGAAGTGTGATAACC        |                           |   |     |          |
| TATCAATTTGATATATAAACTCGTGCCTACCTTCAGGCATTCAAGTTTTCAC                                                                   |                           |   |     |          |
| Cele-UNSB01                                                                                                            | Cele-UNSB01_Fam_178_155_1 | 1 | 155 | 0.000000 |
| TCCCGCTGTGGTTAAAAGTTTTTTCGCGTGCTCAGTTCTGTACGGTAAATGTGTTAAAACTTCTGGAACTTGAAATTCCAAGTTATTTCAGAAAAATTGTTCAAATGGCGCAGTG    |                           |   |     |          |
| GGAAATTCGATTTCTCAGACCCAAGAGGCCACGGGTTCAT                                                                               |                           |   |     |          |
| Cele-UNSB01                                                                                                            | Cele-UNSB01_Fam_179_153_1 | 1 | 153 | 0.000000 |
| TGAGGTGCAGGGCGTGATGAGCTTTGTTGAACTGGGAAGTGTGATTCCCGGAGCCGTGATTTCATAGATGAGTTGGAGGGACCTGCTGTGGAAGTGTGTTCAACTTGAGCAATT     |                           |   |     |          |
| CCATGAGCCATCAAGAAGCTTTCCGGCAGATTGGGCAAC                                                                                |                           |   |     |          |
| Cele-UNSB01                                                                                                            | Cele-UNSB01_Fam_180_151_1 | 1 | 151 | 0.000000 |
| CATTTTCAGATATTCCATCACCACCAACACCTTCATCCACTTCTTCGCCTGGAACGACGGGATTTTCTACAAAAATCGGATTTTTTCTCTATGTGAGTTTAATTGATGTATAATT    |                           |   |     |          |
| CCGAAAAGTCAGTCTTTTCTAGGTTTTTAAATTGAAA                                                                                  |                           |   |     |          |
| Cele-UNSB01                                                                                                            | Cele-UNSB01_Fam_181_150_1 | 1 | 150 | 0.000000 |
| TTGCAACATGCGGTGCGCGGAAAATTCGAATTTTTTCAGTCCAAAACAGGTTTTTTCGACCAATTTTTTCATATTTTCAAGCGAAAATTATGATAGAAAATTCAAATTTTCACTAAAA |                           |   |     |          |
| ATCGCCAATTTTCCACATTTTCTCATTGGAGCGCAC                                                                                   |                           |   |     |          |
| Cele-UNSB01                                                                                                            | Cele-UNSB01_Fam_182_150_1 | 1 | 150 | 0.000000 |
| TTGAGGGCCGCGAGTCCCGAATACACGAAGAAGTGTGAGATCCGTCAAGCCTATTCTAAGCATAATAATTTCAGTTTCGAGTGTGCAAGCCCCAAATAGACGCAGAAGCGTTGGA    |                           |   |     |          |
| CAACTTTTAGGCCTATTCTGAGCCCAATAATTCATG                                                                                   |                           |   |     |          |
| Cele-UNSB01                                                                                                            | Cele-UNSB01_Fam_183_146_1 | 1 | 146 | 0.000000 |
| TGGCCTAGAAATCNCAAGTTTGAAAAGTTAGGCCACCAACTTCAAATGCCTATAACTCAGCGGAAAATCAATATTTTCCATTGATTTTAACTGCTAAGATGTAGCCAATTACG      |                           |   |     |          |
| TAGCGCAACTTTTTTGGCCTACTTAACAATTGG                                                                                      |                           |   |     |          |
| Cele-UNSB01                                                                                                            | Cele-UNSB01_Fam_184_144_1 | 1 | 144 | 0.000000 |
| TTCTAGGCCACCAATTGGAAATCATCATAACTTGGCTTAAAAATCCAGATTTTTTGGAGTCTGGTAACTGCAACATGTTGCCCTGTAGTTTTTCTACAAGTTAGGATATATTAATT   |                           |   |     |          |
| TTTGGTGGCCTAAAAGTCCAAATTATGGAT                                                                                         |                           |   |     |          |
| Cele-UNSB01                                                                                                            | Cele-UNSB01_Fam_185_143_1 | 1 | 143 | 0.000000 |
| CAGTGGGATTTTCAATGTCTTCCAATCAAACGTCCGGGGTTCGAGTCCGCACAGGGGTATTTATTTTTTGAAGCTGTGATTAACAAGTTTATAGCTGCAAAAGTCATTTTAAT      |                           |   |     |          |
| CGAACTTTTCAGGAAAATGTCCGAATGGCG                                                                                         |                           |   |     |          |
| Cele-UNSB01                                                                                                            | Cele-UNSB01_Fam_186_124_1 | 1 | 124 | 0.000000 |
| AATTTTCAAAGTTTGAAAATCTATTAATTTTGCATATAATTTTTATAAATCTGAAAGAACATAAAATTTGCTACAAAATGGCTACGGGAATTTCTAAAAAATTTAGTTTGAA       |                           |   |     |          |
| GNCAGAAATT                                                                                                             |                           |   |     |          |
| Cele-UNSB01                                                                                                            | Cele-UNSB01_Fam_187_122_1 | 1 | 122 | 0.000000 |
| GATCTACAAAATGCGGGAAAAGTGACACAGAGTTCTCAACTGATTTTGCATAAAAAATCCCGCATTTTTTGGAGATCAAACCGTGATGGGACAGCCTGGCACCCTTGCTTGA       |                           |   |     |          |
| TCTACGTA                                                                                                               |                           |   |     |          |

|                                                                                                                      |                           |   |     |          |
|----------------------------------------------------------------------------------------------------------------------|---------------------------|---|-----|----------|
| Cele-UNSB01                                                                                                          | Cele-UNSB01_Fam_188_121_1 | 1 | 121 | 0.000000 |
| GTTGCAAACCGCAAGAGCAAACCTTGCCAAATGAAAAGCCACCCAAGTACTCGTTGCACCTACCTATCATAAGCTCGTAGACTATAATTTCTCTGAAAAGATAGTTGCCCTAATA  |                           |   |     |          |
| GCAGAAG                                                                                                              |                           |   |     |          |
| Cele-UNSB01                                                                                                          | Cele-UNSB01_Fam_189_119_1 | 1 | 119 | 0.000000 |
| GGCCACCGTTGCATATTTTCGCAATAATTTTTACGGGAACGTAATCTCCACGTCACCAGCTTTCATTTAAGTACCCACACGGCAAGGTTTAATTTTTGAAATTTGGTCGCGGATT  |                           |   |     |          |
| TTCTC                                                                                                                |                           |   |     |          |
| Cele-UNSB01                                                                                                          | Cele-UNSB01_Fam_190_117_1 | 1 | 117 | 0.000000 |
| TACTTCAGATGTTTCCTTTGATTCCACAGGTGCAAGTTTCTCAACTGTTGGTTCGACAGTAGGTGCACTAGTCTCTGGCACTGGAACATCCTTTTGCTCAACAATTTTCTAGCTGG |                           |   |     |          |
| TTG                                                                                                                  |                           |   |     |          |
| Cele-UNSB01                                                                                                          | Cele-UNSB01_Fam_191_114_1 | 1 | 114 | 0.000000 |
| GTGTTTCAGAATTACATGGAGTCTCACTACTTGCAGAAATTTGTGGCTGTAGACGATGGGCCTGCTGTAGTTGAATCGTTTGAACTGTCATAGTGGATGTTCCATCAGACGTTT   |                           |   |     |          |
| Cele-UNSB01                                                                                                          | Cele-UNSB01_Fam_192_108_1 | 1 | 108 | 0.000000 |
| ATCCTCAACACCATCNGCGTCATCTAGTTCCTCCGGAACATATGTCGACAATTTTCTAGGATCAACTGGTTCNACAGTTACAGTTGTACCAGGATCNTCTAGCACATTTGG      |                           |   |     |          |
| Cele-UNSB01                                                                                                          | Cele-UNSB01_Fam_193_108_1 | 1 | 108 | 0.000000 |
| TGGGTAATCAGGTACGGGCTTTTCAAGTTTTCACGTGAATATCTAGGTCACGAGCCAATTTTCTAGCCAGGAGTGGGACTAGAGATATGAACTCTTGGGTTA               |                           |   |     |          |
| Cele-UNSB01                                                                                                          | Cele-UNSB01_Fam_194_108_1 | 1 | 108 | 0.000000 |
| AAGTCTTCTTGATTCTGAGTTCTTGCTTCGAACTGTTGACCATCTCCTTGCAGGATCTTATTGTGAGATGGAACCTTCTTGGCATAACCGTTCTCCACTGATGTGAGTG        |                           |   |     |          |
| Cele-UNSB01                                                                                                          | Cele-UNSB01_Fam_195_104_1 | 1 | 104 | 0.000000 |
| CCTGCGAAAGCGAATCTCTGGCCTGGCGGAGGGCCAACTAACTCTCTCCCTCAAGCCTTCGGGTGCTTCTTGGGTATCGGTGAATTTTTGGGTCTGTGAGGT               |                           |   |     |          |
| Cele-UNSB01                                                                                                          | Cele-UNSB01_Fam_196_102_1 | 1 | 102 | 0.000000 |
| TGATATGTGCAACGATTGATGTTTGAAGAATCAAGAGAATCTGTTGGACGATCAATTCATCTTTGGGTCTTGCTGCAGCATATCTTTCTCCAGTACCACCT                |                           |   |     |          |
| Cele-UNSB01                                                                                                          | Cele-UNSB01_Fam_197_102_1 | 1 | 102 | 0.000000 |
| TGTACACTTCTCCCAAATTGACTGTAAGAATGGACTCCTTATATGATTTTAAACCCGACTCTGGACATACAAACTTCTCTCAAAAAGAAAAATAGACTTCACA              |                           |   |     |          |
| Cele-UNSB01                                                                                                          | Cele-UNSB01_Fam_198_101_1 | 1 | 101 | 0.000000 |
| GCATTTGCATATNGAGATCAGATAAAAAGTTAGAATTTTCCAGCCGTTGCAAGTGCGCTCTATTGAGAACATTTTGAAAATTGAATGTTTTTACATTAGAGC               |                           |   |     |          |
| Cele-UNSB01                                                                                                          | Cele-UNSB01_Fam_199_101_1 | 1 | 101 | 0.000000 |
| GGTTACTGTAGCTCCAGAAATACGCAAAACCCGACTACGGTTCCCTAATACATCAGATATTACGACAAAGTGCAGAAAATCGCTAAAAATGACTTTTACTGG               |                           |   |     |          |
| Cele-UNSB01                                                                                                          | Cele-UNSB01_Fam_200_101_1 | 1 | 101 | 0.000000 |
| TTGATTTTTTCGTCTTATGAAGGAATATTGGTTTCGGGGTAGTGGGCGGATATGGTCGGGGTACTGTAGGTATACGGTAGGGTTACTGTAGTTTTTGGAATTT              |                           |   |     |          |
| Cele-UNSB01                                                                                                          | Cele-UNSB01_Fam_201_96_1  | 1 | 96  | 0.000000 |
| GGTTGATTTGCGGCACTCTACAGATAGTGGATCTGCTTCTTACCAATCTTCCCCTTACCGCCACGCACTTAAGCTCCAACTATTTTATTTTTTTG                      |                           |   |     |          |
| Cele-UNSB01                                                                                                          | Cele-UNSB01_Fam_202_96_1  | 1 | 96  | 0.000000 |
| GTTCCCATAAATTGGGTAAATACCACTCATAAGTAAGTAGTATGGGACTGAAAAGATACTAAATGAGCTTATTCTAAGGGTGAAGCTTCTGGTAAT                     |                           |   |     |          |
| Cele-UNSB01                                                                                                          | Cele-UNSB01_Fam_203_93_1  | 1 | 93  | 0.000000 |
| TGCTTCTCGTCGTCCACCACCACCACCGAAGGGAAGTGGAAAGCCACCACCACCACCAACTGGAGAACCACAGGATCTTCTGGAGAAGGTAA                         |                           |   |     |          |
| Cele-UNSB01                                                                                                          | Cele-UNSB01_Fam_204_93_1  | 1 | 93  | 0.000000 |
| CAGTACCCTCAAGGATCATCTGCTCCACGGTATCCCGTAACTACAATGCCTTTGCCAGCACTTCCGATGCTCCACAGTATCCAGGATCCTCC                         |                           |   |     |          |
| Cele-UNSB01                                                                                                          | Cele-UNSB01_Fam_205_87_1  | 1 | 87  | 0.000000 |
| TGAAGTCGTAGGATTCTGTGTGGTGACTGGTGTGCTGTANTCTGTGAAGGGGACGTGGCTTCTTCCGTTGTGTGTCATGCTTCTNNGG                             |                           |   |     |          |
| Cele-UNSB01                                                                                                          | Cele-UNSB01_Fam_206_81_1  | 1 | 81  | 0.000000 |
| TGTCGGCCGCTACCAAATATTTAGCANACACACCAAGCACTACGTTGCGCACACACACCAAACCTGCGGAACCCCGAACAG                                    |                           |   |     |          |
| Cele-UNSB01                                                                                                          | Cele-UNSB01_Fam_207_80_1  | 1 | 80  | 0.000000 |
| AATTTCTCAATAGGGCGCGCTTGCAACATCTGAACGGCGCGAAATTTGAATTTTTGGCCATAAAATAACGAAAATAACT                                      |                           |   |     |          |
| Cele-UNSB01                                                                                                          | Cele-UNSB01_Fam_208_78_1  | 1 | 78  | 0.000000 |
| CGAAGTTGCTGGACCAAAGATCACAACAGGCGGATTTGGCGGCATAACCGGAGCAACAGTAGTGTCATTTGGTTCTTC                                       |                           |   |     |          |



|                                                                                |                          |   |    |          |
|--------------------------------------------------------------------------------|--------------------------|---|----|----------|
| Cele-UNSB01                                                                    | Cele-UNSB01_Fam_209_78_1 | 1 | 78 | 0.000000 |
| TGCAAGGCTCCGATGATGATACCACTTCTAAAGTCGAGGTGTCACAATTTTCGGGTGTCGTAGAACTTGAATCAGTGA |                          |   |    |          |
| Cele-UNSB01                                                                    | Cele-UNSB01_Fam_210_78_1 | 1 | 78 | 0.000000 |
| GAGCTTTGGGGCTTTTGGCTTGATCTCAGTCGACTTGATGGATTCTGGCTTGGGTCTGCAGGCTTTTCGGGCTCCTT  |                          |   |    |          |
| Cele-UNSB01                                                                    | Cele-UNSB01_Fam_211_77_1 | 1 | 77 | 0.000000 |
| GGAAGCTTCATCTTTTGAATTATAAAAAATAAATTTTCATTTCAAAATCAGTGTGTGCACTATCAAAAGTGTCCTACT |                          |   |    |          |
| Cele-UNSB01                                                                    | Cele-UNSB01_Fam_212_73_1 | 1 | 73 | 0.000000 |
| ANTTTGTAGTTTGTAGTCTAGCAGACCAAAATTTATTAAAAACTGCAGAAAATTGATGGGTCTGCTAATTAAG      |                          |   |    |          |
| Cele-UNSB01                                                                    | Cele-UNSB01_Fam_213_72_1 | 1 | 72 | 0.000000 |
| TCCATCCAGCTGTGGTTGGTCTCTGGGTGAATCCTCGAGAAGTATCACTAGTAGTACCATTGGCTCCGTTTCG      |                          |   |    |          |
| Cele-UNSB01                                                                    | Cele-UNSB01_Fam_214_72_1 | 1 | 72 | 0.000000 |
| ATGAATTTTAATACAATTTTCTGACGATGAAGTCATAAAAAATTCATTTTTTGACCTTTCAACTTTAGTTTT       |                          |   |    |          |
| Cele-UNSB01                                                                    | Cele-UNSB01_Fam_215_72_1 | 1 | 72 | 0.000000 |
| TG GTTGTGTTCCCAAAGTGAGAAAAGAGGGTACAGACCTCTGTACGAATATGTCTTATCAGCTTCAAAGA        |                          |   |    |          |
| Cele-UNSB01                                                                    | Cele-UNSB01_Fam_216_71_1 | 1 | 71 | 0.000000 |
| ATTTATGTGAAAATTCAGGTTTTTAGGGCATTTTTTGAGGGAAATCTGAATTTTTCCGATTTTTCTGACGA        |                          |   |    |          |
| Cele-UNSB01                                                                    | Cele-UNSB01_Fam_217_70_1 | 1 | 70 | 0.000000 |
| AAAAATCGATTTTTTGAAGTTTTTCTCAATAGAGCGCATTTTCAACAGCGAAAAAATTGAATTTTTCCGCC        |                          |   |    |          |
| Cele-UNSB01                                                                    | Cele-UNSB01_Fam_218_69_1 | 1 | 69 | 0.000000 |
| AGGTAGGCCTGTAGGCATTGACTGNCAGAAAAGCGTAGACAGGCAAGCAGGTAAAAAGATACATGAGGC          |                          |   |    |          |
| Cele-UNSB01                                                                    | Cele-UNSB01_Fam_219_69_1 | 1 | 69 | 0.000000 |
| GTCTGGACTGGTGTAGTAGAACTGCTTGAGGTTCTGTACTGGTTGTCTCTGGAGCCGTGGTAGTAGTA           |                          |   |    |          |
| Cele-UNSB01                                                                    | Cele-UNSB01_Fam_220_68_1 | 1 | 68 | 0.000000 |
| TTGGTTGAGGCTAGAAAATGTTGTAGTTTGTAGTGTGTTAGCCTCAACCAAAATTAATTTTTTTTTTAA          |                          |   |    |          |
| Cele-UNSB01                                                                    | Cele-UNSB01_Fam_221_65_1 | 1 | 65 | 0.000000 |
| TATCGAGAGAATNTTCCACATTCACTTTGAATTCCNTTTCCAATTTCAATAAGACTCTCAGTAAG              |                          |   |    |          |
| Cele-UNSB01                                                                    | Cele-UNSB01_Fam_222_62_1 | 1 | 62 | 0.000000 |
| GTAGTTTGTAGCTTTAGCCTCAACCAATTAGCTAAAGCTTGAGTGAGGCTATGGTGATTTT                  |                          |   |    |          |
| Cele-UNSB01                                                                    | Cele-UNSB01_Fam_223_62_1 | 1 | 62 | 0.000000 |
| TGCTAACTAGCTACGGCCAGCTTAGGTGCCGGCTGCACGAGCAGTCCTGGTTTAATGTCGGC                 |                          |   |    |          |
| Cele-UNSB01                                                                    | Cele-UNSB01_Fam_224_60_1 | 1 | 60 | 0.000000 |
| CTAGCTAGATTAAACGCTCTCAAGAGACAGCATGTTGTTGTTGCCCAACAAGAAGAAGGCT                  |                          |   |    |          |
| Cele-UNSB01                                                                    | Cele-UNSB01_Fam_225_60_1 | 1 | 60 | 0.000000 |
| ACACAATTGGAGTGGTGTGCTTGAGGAGCTGGATTGAGTTGAGCTCGTTATGTCGGTTGAAG                 |                          |   |    |          |
| Cele-UNSB01                                                                    | Cele-UNSB01_Fam_226_60_1 | 1 | 60 | 0.000000 |
| CTGCTGATTCCGAGAAGAAGGCCCCAGCCAAGAGAGAAGCTGATAAGCCAAAGACTGAAT                   |                          |   |    |          |
| Cele-UNSB01                                                                    | Cele-UNSB01_Fam_227_59_1 | 1 | 59 | 0.000000 |
| CTACAAACTACAAAAGCCTATTTAGCAGACCCACGCCAATTCTGATGGGTCTGCTAGA                     |                          |   |    |          |
| Cele-UNSB01                                                                    | Cele-UNSB01_Fam_228_57_1 | 1 | 57 | 0.000000 |
| GAACTCAACAAGCTGATCAAGAGCAACACCGTGGATCCCAGCTGCCGGACAGAAGG                       |                          |   |    |          |
| Cele-UNSB01                                                                    | Cele-UNSB01_Fam_229_55_1 | 1 | 55 | 0.000000 |
| GGGATTATTGGAGTTTCTTTTTTCTAGAATTTTTTGAAAATTTTGGACAGTTTTTTT                      |                          |   |    |          |
| Cele-UNSB01                                                                    | Cele-UNSB01_Fam_230_55_1 | 1 | 55 | 0.000000 |
| AAGAGTCCCCACACACTGAAAGGTTTTTAAGGAATTTTTTGAGGATTCTAGGGTT                        |                          |   |    |          |

|                                                      |                          |   |    |          |
|------------------------------------------------------|--------------------------|---|----|----------|
| Cele-UNSB01                                          | Cele-UNSB01_Fam_231_52_1 | 1 | 52 | 0.000000 |
| GCATGTCTTCCAAGCGTTTTGAGCCACGCNTGGGATTTCTTATACACGGCTG |                          |   |    |          |
| Cele-UNSB01                                          | Cele-UNSB01_Fam_232_50_1 | 1 | 50 | 0.000000 |
| ACACATGCTATAACATTGTCTCCTTCCCCTAGTGCACGAGAGCGGCCGTT   |                          |   |    |          |
| Cele-UNSB01                                          | Cele-UNSB01_Fam_233_50_1 | 1 | 50 | 0.000000 |
| GGGCGTGTTTTACATGCCCGCCCAAAAATTGATGTTTCCACCAAAAT      |                          |   |    |          |
| Cele-UNSB01                                          | Cele-UNSB01_Fam_234_49_1 | 1 | 49 | 0.000000 |
| CAATAATTTTAAATTAAATTATCGATTTTTTCTAAATTTTTCCGAAAAAT   |                          |   |    |          |
| Cele-UNSB01                                          | Cele-UNSB01_Fam_235_48_1 | 1 | 48 | 0.000000 |
| TGCCTACGTGCCTACAAAACAGGCGTAGGCAGCTTTAAAGGTGATGCA     |                          |   |    |          |
| Cele-UNSB01                                          | Cele-UNSB01_Fam_236_48_1 | 1 | 48 | 0.000000 |
| GGAGGTGGAGAAAGTGTAGTTCCCGGTGGTCGNGGCTCTTCNGAGGGT     |                          |   |    |          |
| Cele-UNSB01                                          | Cele-UNSB01_Fam_237_46_1 | 1 | 46 | 0.000000 |
| TGGTAAATTGCCTCCCGGANCACTTTTCTTATTTCCCAACTA           |                          |   |    |          |
| Cele-UNSB01                                          | Cele-UNSB01_Fam_238_45_1 | 1 | 45 | 0.000000 |
| AGCACCACCATCAGGCGGACCACCAGGACCATTTGATCCATCAGG        |                          |   |    |          |
| Cele-UNSB01                                          | Cele-UNSB01_Fam_239_45_1 | 1 | 45 | 0.000000 |
| CCAAGCACATCTACAGAGACACCTACAACCTGAATCAACTGCAGCA       |                          |   |    |          |
| Cele-UNSB01                                          | Cele-UNSB01_Fam_240_45_1 | 1 | 45 | 0.000000 |
| CTCCATCCACCAGCACTGCTTCGAGTACGACAGAAAGCACTTCGA        |                          |   |    |          |
| Cele-UNSB01                                          | Cele-UNSB01_Fam_241_43_1 | 1 | 43 | 0.000000 |
| CGAGTTTGGCCTACANCAAATTTGGCAAATTCGGCAAATTTGC          |                          |   |    |          |
| Cele-UNSB01                                          | Cele-UNSB01_Fam_242_43_1 | 1 | 43 | 0.000000 |
| GAAAACTAGGCCACAGAGTTCAAATTGATGGCCTAGAAATCTA          |                          |   |    |          |
| Cele-UNSB01                                          | Cele-UNSB01_Fam_243_43_1 | 1 | 43 | 0.000000 |
| GGCTCTCGGCTCGCGCCGAGAGCCGAGNTCTACTNAAAAGTTTC         |                          |   |    |          |
| Cele-UNSB01                                          | Cele-UNSB01_Fam_244_43_1 | 1 | 43 | 0.000000 |
| AGCAGCCGACAGTTGCCGTTGCCGAAAAATTGCAGTAATTTTC          |                          |   |    |          |
| Cele-UNSB01                                          | Cele-UNSB01_Fam_245_42_1 | 1 | 42 | 0.000000 |
| TTTGATCTACAAAAAATGCGGGAATTTTCCAGCATTGCTCA            |                          |   |    |          |
| Cele-UNSB01                                          | Cele-UNSB01_Fam_246_42_1 | 1 | 42 | 0.000000 |
| AGGTGCTGCTTCTTTGGAACATCTGCTTGGGTGGCTCCGA             |                          |   |    |          |
| Cele-UNSB01                                          | Cele-UNSB01_Fam_247_41_1 | 1 | 41 | 0.000000 |
| AAATTTTTTAACGAGAAGTGGGCGAAAAATCATTCAAAAATTC          |                          |   |    |          |
| Cele-UNSB01                                          | Cele-UNSB01_Fam_248_41_1 | 1 | 41 | 0.000000 |
| GCATTTTTTCGCCGATTTTTTNATTAATTTTCAGTGAAAAATTC         |                          |   |    |          |
| Cele-UNSB01                                          | Cele-UNSB01_Fam_249_40_1 | 1 | 40 | 0.000000 |
| TCCACGTGGAATTTTCAGAATTTTCNCAGAAAAATTTGAAA            |                          |   |    |          |
| Cele-UNSB01                                          | Cele-UNSB01_Fam_250_40_1 | 1 | 40 | 0.000000 |
| GAATTTTTTGCATTTCTACTGAATTTTCCAAATTTTCAGC             |                          |   |    |          |
| Cele-UNSB01                                          | Cele-UNSB01_Fam_251_40_1 | 1 | 40 | 0.000000 |
| TTTTGCCAAAAATNTGTCAATTTTGTGGAATTTCTNTCAT             |                          |   |    |          |
| Cele-UNSB01                                          | Cele-UNSB01_Fam_252_39_1 | 1 | 39 | 0.000000 |
| AATTTCCCGCCAAAATTGAATTTTTTTTAAAGAAAAATTTA            |                          |   |    |          |

|                                          |                          |   |    |          |
|------------------------------------------|--------------------------|---|----|----------|
| Cele-UNSB01                              | Cele-UNSB01_Fam_253_39_1 | 1 | 39 | 0.000000 |
| CCAACCTGGAGCCAGCACNATGACCGCTGTTGGAGGAGCA |                          |   |    |          |
| Cele-UNSB01                              | Cele-UNSB01_Fam_254_39_1 | 1 | 39 | 0.000000 |
| GATTTACGGGCTTTAATCAGTTTCGAAAAAGCTTGTGTC  |                          |   |    |          |
| Cele-UNSB01                              | Cele-UNSB01_Fam_255_39_1 | 1 | 39 | 0.000000 |
| TGGTACGGTAGTTGTAGTGGTAGTGGAGGTTGTTGTTGG  |                          |   |    |          |
| Cele-UNSB01                              | Cele-UNSB01_Fam_256_39_1 | 1 | 39 | 0.000000 |
| GTAATTTATAATTTTTTAAAGATGAGTAATATATTGCCC  |                          |   |    |          |
| Cele-UNSB01                              | Cele-UNSB01_Fam_257_39_1 | 1 | 39 | 0.000000 |
| ATTGATACTTTGTCTGGGTTTAGACCATCGGCCGAGCTTC |                          |   |    |          |
| Cele-UNSB01                              | Cele-UNSB01_Fam_258_38_1 | 1 | 38 | 0.000000 |
| AAAATCGATAATTTTCAGTATGCAGTGAAATCTTTGGA   |                          |   |    |          |
| Cele-UNSB01                              | Cele-UNSB01_Fam_259_37_1 | 1 | 37 | 0.000000 |
| ATAATTTTTCTTGAGTAATGAGAGACTTTTTCATAAT    |                          |   |    |          |
| Cele-UNSB01                              | Cele-UNSB01_Fam_260_36_1 | 1 | 36 | 0.000000 |
| GATATTTTCATGTTCTGGCAAAAGTACCGATTGCCA     |                          |   |    |          |
| Cele-UNSB01                              | Cele-UNSB01_Fam_261_36_1 | 1 | 36 | 0.000000 |
| CCACCAACTCCAAAATCAGCTGCTCCATCAGAAGTC     |                          |   |    |          |
| Cele-UNSB01                              | Cele-UNSB01_Fam_262_35_1 | 1 | 35 | 0.000000 |
| AATTGCCGAATTTCTCGTTTTTGGCAATTTACCAA      |                          |   |    |          |
| Cele-UNSB01                              | Cele-UNSB01_Fam_263_35_1 | 1 | 35 | 0.000000 |
| TGTGTAATAAGAAAATTTCAAATTTTTTTCACGAA      |                          |   |    |          |
| Cele-UNSB01                              | Cele-UNSB01_Fam_264_35_1 | 1 | 35 | 0.000000 |
| GCATTTGCCGATTTTTTAAATTTCTGGCAATTCCA      |                          |   |    |          |
| Cele-UNSB01                              | Cele-UNSB01_Fam_265_34_1 | 1 | 34 | 0.000000 |
| CCGTGCCTACTAACCTACCGACCTTGCTGCCTT        |                          |   |    |          |
| Cele-UNSB01                              | Cele-UNSB01_Fam_266_34_1 | 1 | 34 | 0.000000 |
| TTGCCGAATTTGCCGTTTGCCGAGCTCGTCAAAT       |                          |   |    |          |
| Cele-UNSB01                              | Cele-UNSB01_Fam_267_34_1 | 1 | 34 | 0.000000 |
| AAGTATTTTTTGCCGTTTTTTTTTGCCGAAATTTCC     |                          |   |    |          |
| Cele-UNSB01                              | Cele-UNSB01_Fam_268_33_1 | 1 | 33 | 0.000000 |
| TAAGAAAAGTTAGGCCACCAAATTTGGTGAAC         |                          |   |    |          |
| Cele-UNSB01                              | Cele-UNSB01_Fam_269_32_1 | 1 | 32 | 0.000000 |
| GCAATTTTTTAGGCTAAAAATCACTAAAAAACT        |                          |   |    |          |
| Cele-UNSB01                              | Cele-UNSB01_Fam_270_32_1 | 1 | 32 | 0.000000 |
| AAATTTGTGAAAATTTAGGCCCATTTTGCTCA         |                          |   |    |          |
| Cele-UNSB01                              | Cele-UNSB01_Fam_271_32_1 | 1 | 32 | 0.000000 |
| GTGCGTCCGGCGTCCGGAAAAAGCGGACGCGT         |                          |   |    |          |
| Cele-UNSB01                              | Cele-UNSB01_Fam_272_31_1 | 1 | 31 | 0.000000 |
| ATCGATTTTTTCGTTAAAAAATCAATAAAAT          |                          |   |    |          |
| Cele-UNSB01                              | Cele-UNSB01_Fam_273_31_1 | 1 | 31 | 0.000000 |
| GCTGATTGGTCGGCGNGGTTGCGCCATCNTT          |                          |   |    |          |
| Cele-UNSB01                              | Cele-UNSB01_Fam_274_31_1 | 1 | 31 | 0.000000 |
| GACATCTCGCAGGACATTATAAGAAGCGACC          |                          |   |    |          |

|                                   |                          |   |    |          |
|-----------------------------------|--------------------------|---|----|----------|
| Cele-UNSB01                       | Cele-UNSB01_Fam_275_31_1 | 1 | 31 | 0.000000 |
| CACGCCTATTTTATGGGCGGAGTCTACAAGC   |                          |   |    |          |
| Cele-UNSB01                       | Cele-UNSB01_Fam_276_31_1 | 1 | 31 | 0.000000 |
| TGCGTCGGAAATTNATTCCGATCATCGCCGG   |                          |   |    |          |
| Cele-UNSB01                       | Cele-UNSB01_Fam_277_31_1 | 1 | 31 | 0.000000 |
| TCCGATGCATTGCCGATAATCGGAACCTGGT   |                          |   |    |          |
| Cele-UNSB01                       | Cele-UNSB01_Fam_278_31_1 | 1 | 31 | 0.000000 |
| GCAGCCGACGCTATACGGGTCTGATGGAGTA   |                          |   |    |          |
| Cele-UNSB01                       | Cele-UNSB01_Fam_279_31_1 | 1 | 31 | 0.000000 |
| TCTGAGCTACAGTACTCCTGTCAAGAACAAT   |                          |   |    |          |
| Cele-UNSB01                       | Cele-UNSB01_Fam_280_31_1 | 1 | 31 | 0.000000 |
| GATTTTTTTCAGNGAAAAANCNAAAAATTTTCG |                          |   |    |          |
| Cele-UNSB01                       | Cele-UNSB01_Fam_281_31_1 | 1 | 31 | 0.000000 |
| CCAAAAATGACTGAAAATAGTCAAAAATTAG   |                          |   |    |          |
| Cele-UNSB01                       | Cele-UNSB01_Fam_282_31_1 | 1 | 31 | 0.000000 |
| CAAAAATCGGGAAATTTTCACAAAAAATGC    |                          |   |    |          |
| Cele-UNSB01                       | Cele-UNSB01_Fam_283_31_1 | 1 | 31 | 0.000000 |
| TTGGCCCAGAGCTCTCTTGACCCAAGCCCC    |                          |   |    |          |
| Cele-UNSB01                       | Cele-UNSB01_Fam_284_31_1 | 1 | 31 | 0.000000 |
| AAAATTTTGACCCAGAAATCGAAAAATTCGC   |                          |   |    |          |
| Cele-UNSB01                       | Cele-UNSB01_Fam_285_31_1 | 1 | 31 | 0.000000 |
| TCGTTTTTTTCATGAAAAAATCAATTTTCGG   |                          |   |    |          |
| Cele-UNSB01                       | Cele-UNSB01_Fam_286_31_1 | 1 | 31 | 0.000000 |
| GAAAAAGTGCTGAAAATCACATTTTGAAC     |                          |   |    |          |
| Cele-UNSB01                       | Cele-UNSB01_Fam_287_30_1 | 1 | 30 | 0.000000 |
| AATTTGAATTTTCCCGAATTTTNAACGAA     |                          |   |    |          |
| Cele-UNSB01                       | Cele-UNSB01_Fam_288_30_1 | 1 | 30 | 0.000000 |
| TGGTGGAAGTGGATTGCGCAGTGGAAATGC    |                          |   |    |          |
| Cele-UNSB01                       | Cele-UNSB01_Fam_289_30_1 | 1 | 30 | 0.000000 |
| CCTTGGGCTCCCTGAGCTCCAAATTGTGCT    |                          |   |    |          |
| Cele-UNSB01                       | Cele-UNSB01_Fam_290_30_1 | 1 | 30 | 0.000000 |
| GTCATTATCAGCTTCTGGTGTCTTAGAAGA    |                          |   |    |          |
| Cele-UNSB01                       | Cele-UNSB01_Fam_291_30_1 | 1 | 30 | 0.000000 |
| CAAACCTACAGTAGTACTGTAGTACCATAAC   |                          |   |    |          |
| Cele-UNSB01                       | Cele-UNSB01_Fam_292_30_1 | 1 | 30 | 0.000000 |
| TTCAGGCAGGCATAGGTTACTTTGAAAATT    |                          |   |    |          |
| Cele-UNSB01                       | Cele-UNSB01_Fam_293_30_1 | 1 | 30 | 0.000000 |
| CCTTGTTAGGCAAGGAGGTAGGCGTAGGTCA   |                          |   |    |          |
| Cele-UNSB01                       | Cele-UNSB01_Fam_294_30_1 | 1 | 30 | 0.000000 |
| TTTCAGGCCAATTTTCNGTCATTTTGGACA    |                          |   |    |          |
| Cele-UNSB01                       | Cele-UNSB01_Fam_295_30_1 | 1 | 30 | 0.000000 |
| AAAATCAAAAATTAGATGAATTTTCGATTA    |                          |   |    |          |
| Cele-UNSB01                       | Cele-UNSB01_Fam_296_30_1 | 1 | 30 | 0.000000 |
| CTCAAATTTGCACTAAAAATTCCAATTTT     |                          |   |    |          |

|                                |                          |   |    |          |                              |
|--------------------------------|--------------------------|---|----|----------|------------------------------|
| Cele-UNSB01                    | Cele-UNSB01_Fam_297_30_1 | 1 | 30 | 0.000000 |                              |
| ACTACCCAACCGGCTCCGGCAACCAGTCCA |                          |   |    |          |                              |
| Cele-UNSB01                    | Cele-UNSB01_Fam_298_29_1 | 1 | 29 | 0.000000 |                              |
| TTGTAAGGATTTCCCACTATGTCAATACA  |                          |   |    |          |                              |
| Cele-UNSB01                    | Cele-UNSB01_Fam_299_29_1 | 1 | 29 | 0.000000 |                              |
| GGCCTAGAAANTTCTATTTGAAAGTTGAT  |                          |   |    |          |                              |
| Cele-UNSB01                    | Cele-UNSB01_Fam_300_29_1 | 1 | 29 | 0.000000 |                              |
| TACATTGCAAGATCTTCTTACTATGTAGG  |                          |   |    |          |                              |
| Cele-UNSB01                    | Cele-UNSB01_Fam_301_29_1 | 1 | 29 | 0.000000 |                              |
| CTCGTCAGTGGGTGGACGAGGAATGAGCG  |                          |   |    |          |                              |
| Cele-UNSB01                    | Cele-UNSB01_Fam_302_28_1 | 1 | 28 | 0.000000 |                              |
| AATGTCCGGCTGCTTCTAGAAACCAGGCA  |                          |   |    |          |                              |
| Cele-UNSB01                    | Cele-UNSB01_Fam_303_28_1 | 1 | 28 | 0.000000 |                              |
| TGCCTCGCCTACGTGCTTATTTTCAGGCA  |                          |   |    |          |                              |
| Cele-UNSB01                    | Cele-UNSB01_Fam_304_28_1 | 1 | 28 | 0.000000 |                              |
| CCAAGAGAATTTCAACCACCTGGAAATT   |                          |   |    |          |                              |
| Cele-UNSB01                    | Cele-UNSB01_Fam_305_27_1 | 1 | 27 | 0.000000 | TTCCGGCAAATCGGCAAATTGCAAAAT  |
| Cele-UNSB01                    | Cele-UNSB01_Fam_306_27_1 | 1 | 27 | 0.000000 | ACAATAAAGTACTATGTATTACCGTAT  |
| Cele-UNSB01                    | Cele-UNSB01_Fam_307_27_1 | 1 | 27 | 0.000000 | TGGAGGCGGCTTCTGGCCTGGTGGTGG  |
| Cele-UNSB01                    | Cele-UNSB01_Fam_308_27_1 | 1 | 27 | 0.000000 | CACTGACCAAAGAAAAATATTANACGTG |
| Cele-UNSB01                    | Cele-UNSB01_Fam_309_26_1 | 1 | 26 | 0.000000 | GGCAGGCGTCAAGCAGGCAGGTTTCA   |
| Cele-UNSB01                    | Cele-UNSB01_Fam_310_26_1 | 1 | 26 | 0.000000 | ACCTACAGTACCCCTGTCCTAGAATG   |
| Cele-UNSB01                    | Cele-UNSB01_Fam_311_26_1 | 1 | 26 | 0.000000 | TACTGTAGTTTGACCTACTTANGGAT   |
| Cele-UNSB01                    | Cele-UNSB01_Fam_312_26_1 | 1 | 26 | 0.000000 | ATTTACGGAGCTTCAAGCTTGTGTCG   |
| Cele-UNSB01                    | Cele-UNSB01_Fam_313_26_1 | 1 | 26 | 0.000000 | TGAAATTTTCAAAAATATCGATTTTC   |
| Cele-UNSB01                    | Cele-UNSB01_Fam_314_25_1 | 1 | 25 | 0.000000 | GTCGGCTGCTTNCAAACCCCTGAGTT   |
| Cele-UNSB01                    | Cele-UNSB01_Fam_315_25_1 | 1 | 25 | 0.000000 | AAAAATCTGTTCTNNGAGGTCCCTG    |
| Cele-UNSB01                    | Cele-UNSB01_Fam_316_24_1 | 1 | 24 | 0.000000 | GTGAGGTACGAGGTGAGGTANGAG     |
| Cele-UNSB01                    | Cele-UNSB01_Fam_317_24_1 | 1 | 24 | 0.000000 | AAGCACCACCTCCTCCAACCTACAA    |
| Cele-UNSB01                    | Cele-UNSB01_Fam_318_24_1 | 1 | 24 | 0.000000 | AAGAAGGATGCTGAAGAGAAGAAG     |
| Cele-UNSB01                    | Cele-UNSB01_Fam_319_24_1 | 1 | 24 | 0.000000 | GCTTCTGGAGCTACAGGTTATCCA     |
| Cele-UNSB01                    | Cele-UNSB01_Fam_320_24_1 | 1 | 24 | 0.000000 | TCAACAACAACAGGAGAAGCTTCT     |
| Cele-UNSB01                    | Cele-UNSB01_Fam_321_24_1 | 1 | 24 | 0.000000 | GGTGGCTGGTCACAAAAGTAAGTT     |
| Cele-UNSB01                    | Cele-UNSB01_Fam_322_23_1 | 1 | 23 | 0.000000 | GCATCATAAGGATCATAGTTGAT      |
| Cele-UNSB01                    | Cele-UNSB01_Fam_323_23_1 | 1 | 23 | 0.000000 | CGCTGTAAGACCCCTTCGCTGTAC     |
| Cele-UNSB01                    | Cele-UNSB01_Fam_324_23_1 | 1 | 23 | 0.000000 | GCTACAGTACCCCAGCTTGACTT      |
| Cele-UNSB01                    | Cele-UNSB01_Fam_325_23_1 | 1 | 23 | 0.000000 | TTTTCAGAAATAGGTATTTTCAGA     |
| Cele-UNSB01                    | Cele-UNSB01_Fam_326_22_1 | 1 | 22 | 0.000000 | TTAAATTTTGTGAGTTTGACC        |
| Cele-UNSB01                    | Cele-UNSB01_Fam_327_22_1 | 1 | 22 | 0.000000 | TTTTAGCCAAAAAATCCGTTAA       |
| Cele-UNSB01                    | Cele-UNSB01_Fam_328_22_1 | 1 | 22 | 0.000000 | GCACGGCCTGGCGGTCCCTGAGG      |
| Cele-UNSB01                    | Cele-UNSB01_Fam_329_22_1 | 1 | 22 | 0.000000 | CTACAGTAACCCTAGTATTGAA       |
| Cele-UNSB01                    | Cele-UNSB01_Fam_330_22_1 | 1 | 22 | 0.000000 | CAAAACCCCAAGTAGATCCCCT       |
| Cele-UNSB01                    | Cele-UNSB01_Fam_331_22_1 | 1 | 22 | 0.000000 | AAGCGGTAACGTCGTCTATATA       |
| Cele-UNSB01                    | Cele-UNSB01_Fam_332_22_1 | 1 | 22 | 0.000000 | TGCTAATTAGCGCGGNTGCGTN       |
| Cele-UNSB01                    | Cele-UNSB01_Fam_333_22_1 | 1 | 22 | 0.000000 | ACGTATACAGGCATATACACAT       |

|             |                          |   |    |          |                        |
|-------------|--------------------------|---|----|----------|------------------------|
| Cele-UNSB01 | Cele-UNSB01_Fam_334_22_1 | 1 | 22 | 0.000000 | CCGGCGTGGTNTTGAAGCGGTC |
| Cele-UNSB01 | Cele-UNSB01_Fam_335_22_1 | 1 | 22 | 0.000000 | TTTGTGGGAGGCGACATATACC |
| Cele-UNSB01 | Cele-UNSB01_Fam_336_21_1 | 1 | 21 | 0.000000 | TGGCCTAGATTNTTTACAGGG  |
| Cele-UNSB01 | Cele-UNSB01_Fam_337_21_1 | 1 | 21 | 0.000000 | TCTCCTGGTAAATTTAAAAAT  |
| Cele-UNSB01 | Cele-UNSB01_Fam_338_21_1 | 1 | 21 | 0.000000 | ACCACCCCTACAACNACCACC  |
| Cele-UNSB01 | Cele-UNSB01_Fam_339_21_1 | 1 | 21 | 0.000000 | AACTTTTTTGGCAATTTTCCAA |
| Cele-UNSB01 | Cele-UNSB01_Fam_340_21_1 | 1 | 21 | 0.000000 | TGTGCCCTGGAAAGCTGGCAG  |
| Cele-UNSB01 | Cele-UNSB01_Fam_341_21_1 | 1 | 21 | 0.000000 | CTACGTAAGAGTAGCGCAGGA  |
| Cele-UNSB01 | Cele-UNSB01_Fam_342_21_1 | 1 | 21 | 0.000000 | AATCTAGCCAGACGCACACCT  |
| Cele-UNSB01 | Cele-UNSB01_Fam_343_21_1 | 1 | 21 | 0.000000 | CAATTTTCTGTTNAACTTTGA  |
| Cele-UNSB01 | Cele-UNSB01_Fam_344_21_1 | 1 | 21 | 0.000000 | AAGTTTTACTTTGATTTTTTTT |
| Cele-UNSB01 | Cele-UNSB01_Fam_345_21_1 | 1 | 21 | 0.000000 | GGCAATTTTCCAGTGCAATTC  |
| Cele-UNSB01 | Cele-UNSB01_Fam_346_21_1 | 1 | 21 | 0.000000 | CCATAGGTGGAAGATCTNATA  |
| Cele-UNSB01 | Cele-UNSB01_Fam_347_21_1 | 1 | 21 | 0.000000 | GATTTACGGGGTGAACATGTG  |
| Cele-UNSB01 | Cele-UNSB01_Fam_348_21_1 | 1 | 21 | 0.000000 | TTGGTGACAAATGTGGAAACAA |
| Cele-UNSB01 | Cele-UNSB01_Fam_349_21_1 | 1 | 21 | 0.000000 | TTCTAATTCGACGCGCATNGT  |
| Cele-UNSB01 | Cele-UNSB01_Fam_350_21_1 | 1 | 21 | 0.000000 | CTAATTAGCGTCGCTTCCNNT  |
| Cele-UNSB01 | Cele-UNSB01_Fam_351_21_1 | 1 | 21 | 0.000000 | AAAAATCGATAAAATTTGGAN  |
| Cele-UNSB01 | Cele-UNSB01_Fam_352_21_1 | 1 | 21 | 0.000000 | CACACGAGCTTGAGAGCCCGG  |
| Cele-UNSB01 | Cele-UNSB01_Fam_353_21_1 | 1 | 21 | 0.000000 | TATTTTCAAAAAATTTAAAAA  |
| Cele-UNSB01 | Cele-UNSB01_Fam_354_21_1 | 1 | 21 | 0.000000 | ACCCCGATTTTCACCCAAAAA  |
| Cele-UNSB01 | Cele-UNSB01_Fam_355_21_1 | 1 | 21 | 0.000000 | CTCAATTCAATCAAGGAAATC  |
| Cele-UNSB01 | Cele-UNSB01_Fam_356_21_1 | 1 | 21 | 0.000000 | CCATGTAGCTTCAAAATTNCT  |
| Cele-UNSB01 | Cele-UNSB01_Fam_357_21_1 | 1 | 21 | 0.000000 | TGTCCGTGATGATCATGNGCA  |
| Cele-UNSB01 | Cele-UNSB01_Fam_358_21_1 | 1 | 21 | 0.000000 | GGTGGACCCANGGGTTCCTAG  |
| Cele-UNSB01 | Cele-UNSB01_Fam_359_20_1 | 1 | 20 | 0.000000 | CTATCGCCTGCTATCGCCTA   |
| Cele-UNSB01 | Cele-UNSB01_Fam_360_20_1 | 1 | 20 | 0.000000 | ATTTGACCTACTTTTTTAAAA  |
| Cele-UNSB01 | Cele-UNSB01_Fam_361_19_1 | 1 | 19 | 0.000000 | GTACTACCTTTTAAATGTAT   |
| Cele-UNSB01 | Cele-UNSB01_Fam_362_19_1 | 1 | 19 | 0.000000 | CCCTGATACCCCTAGTCC     |
| Cele-UNSB01 | Cele-UNSB01_Fam_363_19_1 | 1 | 19 | 0.000000 | TATGGTGCATCTAACTAGT    |
| Cele-UNSB01 | Cele-UNSB01_Fam_364_18_1 | 1 | 18 | 0.000000 | AAAAGTTACAGTGTCTCTT    |
| Cele-UNSB01 | Cele-UNSB01_Fam_365_18_1 | 1 | 18 | 0.000000 | TTGTAGATCAACGGGGTC     |
| Cele-UNSB01 | Cele-UNSB01_Fam_366_18_1 | 1 | 18 | 0.000000 | GGAGGTCCAGGTACCCCG     |
| Cele-UNSB01 | Cele-UNSB01_Fam_367_18_1 | 1 | 18 | 0.000000 | TAAATAAGTGGCTATAAT     |
| Cele-UNSB01 | Cele-UNSB01_Fam_368_18_1 | 1 | 18 | 0.000000 | ACTACTGTATCNCAGGAG     |
| Cele-UNSB01 | Cele-UNSB01_Fam_369_18_1 | 1 | 18 | 0.000000 | CCTTCGCCTACCTACGTG     |
| Cele-UNSB01 | Cele-UNSB01_Fam_370_18_1 | 1 | 18 | 0.000000 | TTTTTTGATAATTCTTGA     |
| Cele-UNSB01 | Cele-UNSB01_Fam_371_18_1 | 1 | 18 | 0.000000 | AAATATTCTTATTTTCAG     |
| Cele-UNSB01 | Cele-UNSB01_Fam_372_18_1 | 1 | 18 | 0.000000 | CCTGGTTGTCCNTCTNNT     |
| Cele-UNSB01 | Cele-UNSB01_Fam_373_18_1 | 1 | 18 | 0.000000 | TTTCATAAGAAGTAAATN     |
| Cele-UNSB01 | Cele-UNSB01_Fam_374_18_1 | 1 | 18 | 0.000000 | CATTGTCACTTTCTTCTC     |
| Cele-UNSB01 | Cele-UNSB01_Fam_375_18_1 | 1 | 18 | 0.000000 | AAGCCTATGCCTTTCCCA     |
| Cele-UNSB01 | Cele-UNSB01_Fam_376_17_1 | 1 | 17 | 0.000000 | ACTTGGTACATAGGCCA      |
| Cele-UNSB01 | Cele-UNSB01_Fam_377_17_1 | 1 | 17 | 0.000000 | ATTTTTTCCGCAAGTAG      |
| Cele-UNSB01 | Cele-UNSB01_Fam_378_17_1 | 1 | 17 | 0.000000 | AAAAATCAAACCGGCGGA     |

|             |                          |   |    |          |                    |
|-------------|--------------------------|---|----|----------|--------------------|
| Cele-UNSB01 | Cele-UNSB01_Fam_379_17_1 | 1 | 17 | 0.000000 | AAATGCCAAAANTGCCA  |
| Cele-UNSB01 | Cele-UNSB01_Fam_380_17_1 | 1 | 17 | 0.000000 | TAACCTGACTGCTACAG  |
| Cele-UNSB01 | Cele-UNSB01_Fam_381_17_1 | 1 | 17 | 0.000000 | GAATTAGAAAAATTTGA  |
| Cele-UNSB01 | Cele-UNSB01_Fam_382_17_1 | 1 | 17 | 0.000000 | TTGCAAGAAAAATCTGCA |
| Cele-UNSB01 | Cele-UNSB01_Fam_383_17_1 | 1 | 17 | 0.000000 | TTTTAACGTGACCTAGT  |
| Cele-UNSB01 | Cele-UNSB01_Fam_384_16_1 | 1 | 16 | 0.000000 | TGATCTGATGATCTGA   |
| Cele-UNSB01 | Cele-UNSB01_Fam_385_16_1 | 1 | 16 | 0.000000 | AATACGGGAATACGGG   |
| Cele-UNSB01 | Cele-UNSB01_Fam_386_16_1 | 1 | 16 | 0.000000 | TTATAGTGTTATAGTG   |
| Cele-UNSB01 | Cele-UNSB01_Fam_387_16_1 | 1 | 16 | 0.000000 | TGTATATATATATATA   |
| Cele-UNSB01 | Cele-UNSB01_Fam_388_16_1 | 1 | 16 | 0.000000 | AAAAATTATTGAATAC   |
| Cele-UNSB01 | Cele-UNSB01_Fam_389_16_1 | 1 | 16 | 0.000000 | GAATAATATTGGAGAA   |
| Cele-UNSB01 | Cele-UNSB01_Fam_390_16_1 | 1 | 16 | 0.000000 | CTTAGATCTCAATTCC   |
| Cele-UNSB01 | Cele-UNSB01_Fam_391_16_1 | 1 | 16 | 0.000000 | AGAGAGTATAGATTAG   |
| Cele-UNSB01 | Cele-UNSB01_Fam_392_15_1 | 1 | 15 | 0.000000 | CGACCTGCGACCTAG    |
| Cele-UNSB01 | Cele-UNSB01_Fam_393_15_1 | 1 | 15 | 0.000000 | CACAGGAGGCTGGGA    |
| Cele-UNSB01 | Cele-UNSB01_Fam_394_14_1 | 1 | 14 | 0.000000 | AGCTTGAAGCTTGG     |
| Cele-UNSB01 | Cele-UNSB01_Fam_395_14_1 | 1 | 14 | 0.000000 | TTACCAAAATCTAA     |
| Cele-UNSB01 | Cele-UNSB01_Fam_396_13_1 | 1 | 13 | 0.000000 | GGCTTCTAGTCCA      |
| Cele-UNSB01 | Cele-UNSB01_Fam_397_13_1 | 1 | 13 | 0.000000 | TTGGGGTGGGCCT      |
| Cele-UNSB01 | Cele-UNSB01_Fam_398_12_1 | 1 | 12 | 0.000000 | AATACCAACCAC       |
| Cele-UNSB01 | Cele-UNSB01_Fam_399_12_1 | 1 | 12 | 0.000000 | AGTTATATAGTA       |
| Cele-UNSB01 | Cele-UNSB01_Fam_400_12_1 | 1 | 12 | 0.000000 | CATTGACTTGAG       |
| Cele-UNSB01 | Cele-UNSB01_Fam_401_11_1 | 1 | 11 | 0.000000 | TTGTTTACAAG        |
| Cele-UNSB01 | Cele-UNSB01_Fam_402_11_1 | 1 | 11 | 0.000000 | TACCTACTAGA        |
| Cele-UNSB01 | Cele-UNSB01_Fam_403_11_1 | 1 | 11 | 0.000000 | AGATACACTTC        |
| Cele-UNSB01 | Cele-UNSB01_Fam_404_11_1 | 1 | 11 | 0.000000 | TTTCAGGCCTA        |
| Cele-UNSB01 | Cele-UNSB01_Fam_405_10_1 | 1 | 10 | 0.000000 | GATTTTTCATA        |
| Cele-UNSB01 | Cele-UNSB01_Fam_406_10_1 | 1 | 10 | 0.000000 | CAGCAGAGTG         |
| Cele-UNSB01 | Cele-UNSB01_Fam_407_10_1 | 1 | 10 | 0.000000 | AACTTTTCGAA        |
| Cele-UNSB01 | Cele-UNSB01_Fam_408_10_1 | 1 | 10 | 0.000000 | TGGCGAAAGC         |
