# Supplementary material for: DNA Satellites Are Transcribed as Part of the Non-Coding Genome in Eukaryotes and Bacteria
Source: Genes (Basel). 2021 Oct 20;12(11):1651. doi: 10.3390/genes12111651 (PMC8625621; doi:10.3390/genes12111651)
Supplement: Supplementary file 1 [file genes-12-01651-s001.zip]

Archive with 6 entries (6 files):
- Table S1. A list of all satellites in C.elegans.pdf
- Table S2. Sequence of all satellites in C.elegans.pdf
- Table S3. Alignment of satellites in families.pdf
- Table S4. Satellite families in C.elegans.pdf
- Table S5. Sequence of main families of B.coagulans satellites.pdf
- Table S6. Example of perfect hits.pdf
